# Supplementary material for: An Active Site Tyr Residue Guides the Regioselectivity of Lysine Hydroxylation by Nonheme Iron Lysine-4-hydroxylase Enzymes through Proton-Coupled Electron Transfer
Source: PubMed Central journal article supplement (PMC11066847; doi:10.1021/jacs.3c14574), 2024-04-18
Supplement: ja3c14574_si_001.pdf [file ja3c14574_si_001.pdf]

## Supporting Information

### **An Active Site Tyr Residue Guides the Regioselectivity of Lysine Hydroxylation by the Nonheme Iron Lysine-4-Hydroxylase enzymes Through Proton-Coupled-Electron-Transfer.**

Yuanxin Cao,<sup>§,&</sup> Sam Hay,<sup>§,&</sup> and Sam P. de Visser<sup>\*§,⊥</sup>

<sup>§</sup> Manchester Institute of Biotechnology, The University of Manchester, 131 Princess Street, Manchester M1 7DN, United Kingdom

<sup>&</sup> Department of Chemistry, The University of Manchester, Oxford Road, Manchester M13 9PL, United Kingdom

<sup>⊥</sup> Department of Chemical Engineering, The University of Manchester, Oxford Road, Manchester M13 9PL, United Kingdom

Email: [sam.devisser@manchester.ac.uk](mailto:sam.devisser@manchester.ac.uk)

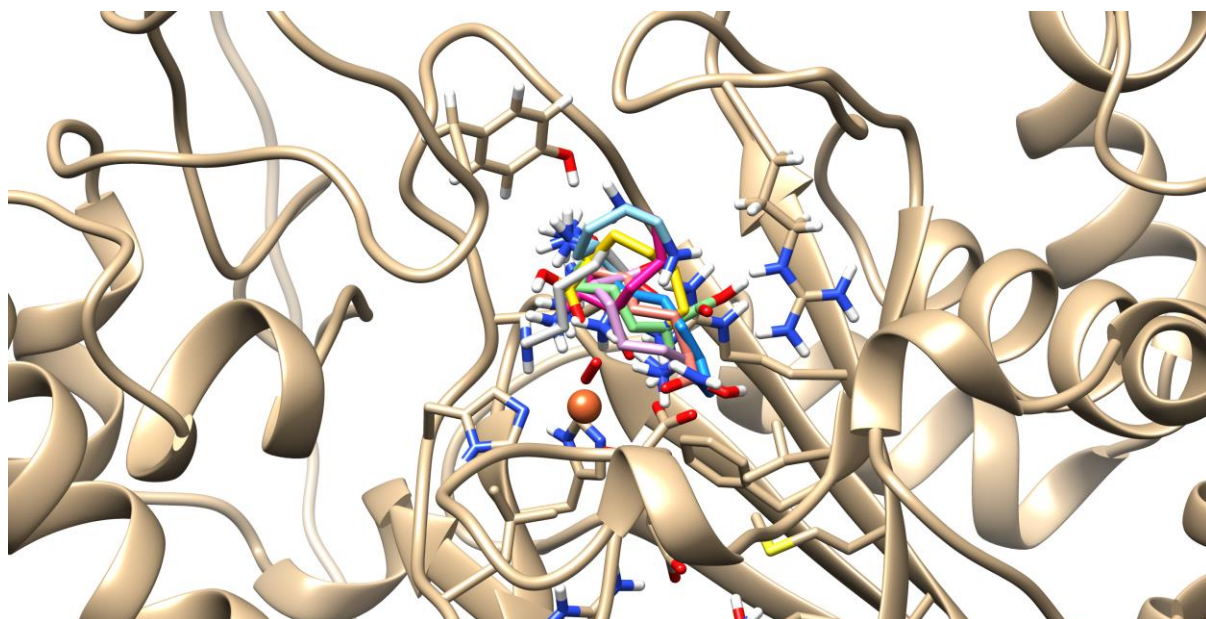

**Figure S1: Overlay of the docked substrate positions in the active site of KDO5. The light-blue structure/position was selected as starting point for the MD simulation.**

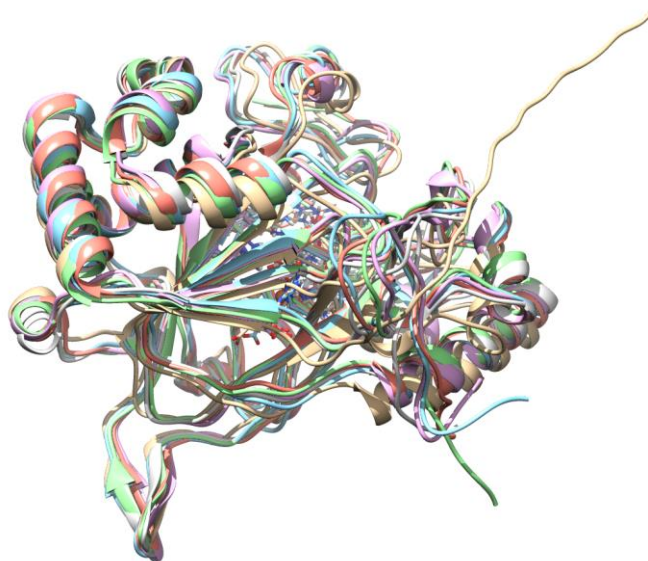

**Figure S2: Overlay of the MD frames after 0 ns (starting point, yellow), 10 ns, 20 ns, 30 ns, 40 ns and 50 ns (other colors).**

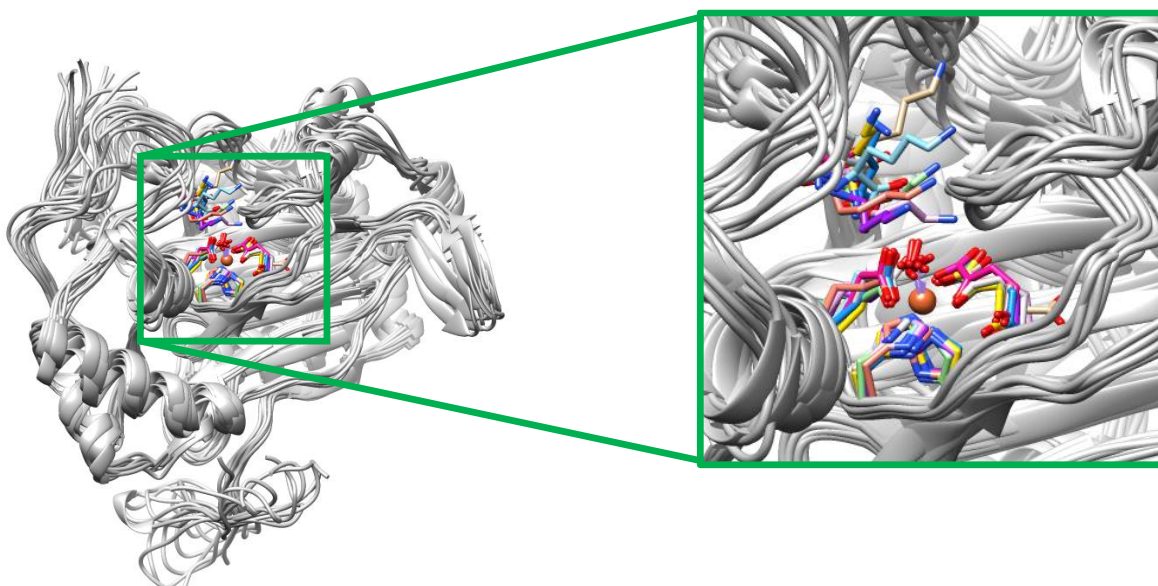

**Figure S3: Overlay of the MD frames after 20, 40, 60, 80, 100, 120, 140, 160, 180, and 200 ns. As can be seen the protein chains are highly similar throughout the MD simulation and also the metal with its first coordination appears rigid during the full MD simulation. Even the  $\alpha$ KG is in similar positions throughout the MD simulation.**

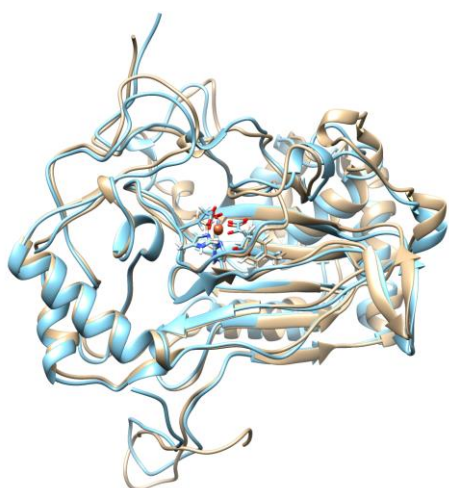

Overlay  $\text{Sn}_{50}$  and  $\text{Sn}_{200}$

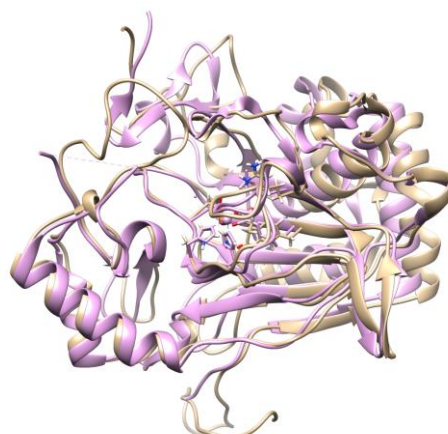

Overlay 6EUR pdb and  $\text{Sn}_{200}$

Figure S4: Overlay of the MD frames after 50 ns and 200 ns (left-hand-side) and an overlay of the MD frame after 200 ns with the original 6EUR pdb file. As can be seen, both MD frames have almost identical fold and metal first-coordination sphere. The overlay of the last frame from the MD with the crystal structure coordinates also shows similar fold.

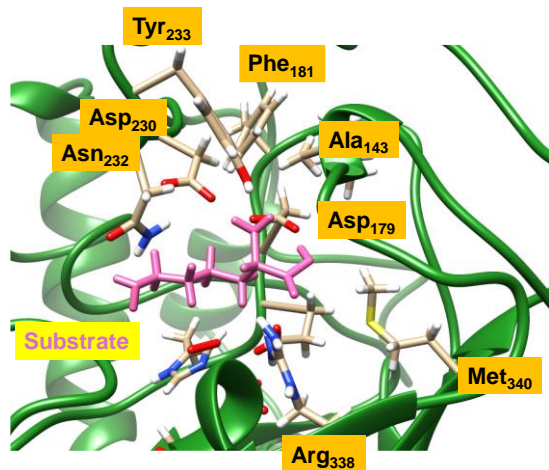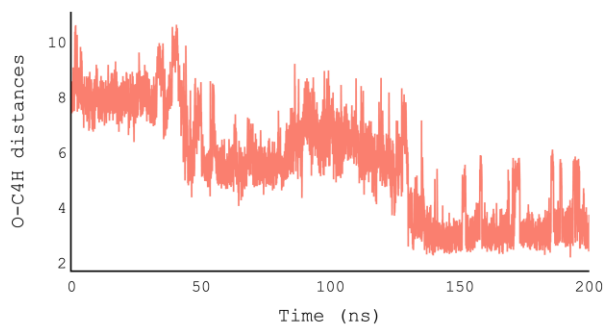

Figure S5: Left: Substrate positioning in the active site in the snapshot after 200 ns from the MD simulation. Right O-HC<sub>4</sub> distance measured along the 200 ns MD simulation.

**Table S1: Docking results given by Autodock vina on L-Lys docking into the 6EUR pdb file (chain A).**

| Position | Score  | RMSD Å | BFE kcal/mol |
|----------|--------|--------|--------------|
| 1        | -4.816 | 0.000  | -6.878       |
| 2        | -4.798 | 3.191  | -6.854       |
| 3        | -4.751 | 3.565  | -6.788       |
| 4        | -4.746 | 1.881  | -6.782       |
| 5        | -4.715 | 2.599  | -6.738       |
| 6        | -4.712 | 2.694  | -6.735       |
| 7        | -4.578 | 2.469  | -6.550       |
| 8        | -4.556 | 3.407  | -6.519       |
| 9        | -4.527 | 4.241  | -6.479       |

**Table S2: Atoms selected in the measurement of residue-substrate distances in the MD structural analysis.**

| atom1  |      | atom2 |     |
|--------|------|-------|-----|
| ALA143 | HB2  | L-LYS | HC  |
| ARG145 | 2HH1 | L-LYS | H22 |
| ASP179 | OD2  | L-LYS | H15 |
| ASP230 | OD1  | L-LYS | HC4 |
| ASN232 | OD1  | L-LYS | HC7 |
| ARG338 | 2HH2 | L-LYS | O1  |

**Table S3: Atomic names and coordinates of L-Lysine used as a substrate in MD simulations.**

|      |       |       |       |
|------|-------|-------|-------|
| C3   | 28.39 | 34.07 | 59.40 |
| HC2  | 28.22 | 34.59 | 60.35 |
| HC3  | 28.95 | 33.16 | 59.63 |
| C1   | 29.13 | 34.93 | 58.34 |
| HC   | 28.45 | 35.64 | 57.88 |
| C2   | 30.15 | 35.94 | 59.04 |
| O1   | 29.83 | 36.53 | 60.02 |
| O2   | 31.30 | 36.28 | 58.42 |
| H15  | 31.27 | 35.93 | 57.52 |
| N1   | 29.75 | 34.08 | 57.22 |
| 2HN1 | 30.15 | 33.28 | 57.73 |
| 3HN1 | 30.42 | 34.53 | 56.58 |
| 1HN1 | 28.96 | 33.73 | 56.66 |
| C4   | 26.95 | 33.62 | 58.89 |
| HC4  | 26.45 | 32.97 | 59.62 |
| HC5  | 27.05 | 33.10 | 57.93 |
| C5   | 25.88 | 34.74 | 58.62 |
| HC6  | 24.96 | 34.19 | 58.38 |
| HC7  | 26.06 | 35.37 | 57.74 |
| C6   | 25.73 | 35.68 | 59.84 |
| HC8  | 24.83 | 36.28 | 59.65 |
| HC9  | 25.59 | 35.22 | 60.82 |
| N2   | 26.76 | 36.71 | 59.86 |
| H21  | 26.44 | 37.39 | 60.55 |
| H22  | 27.57 | 36.27 | 60.30 |

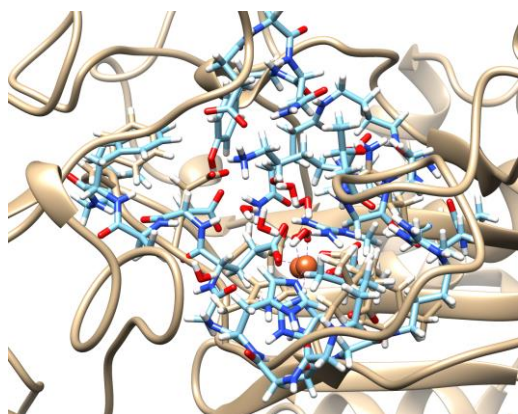

Overlay  $^5\text{Re}_c$  and  $\text{Sn}_{200}$

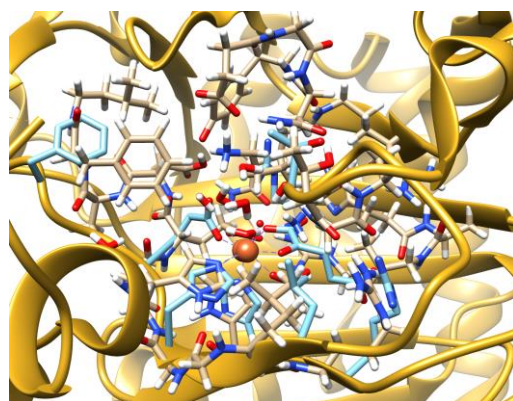

Overlay  $^5\text{Re}_c$  and 6EUR pdb

Figure S6: Overlay of the optimized reactant spin structure ( $^5\text{Re}_c$ ) with the last snapshot of the MD simulation (left-hand-side) and with the crystal structure coordinates of the 6EUR pdb (right-hand-side).

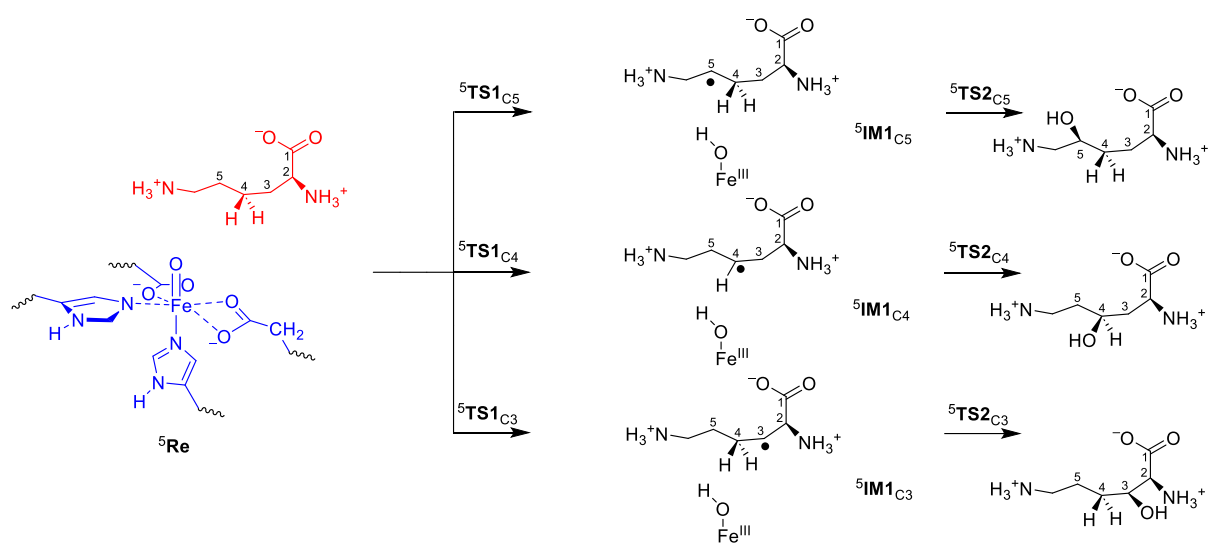

**Scheme S1: Reaction scheme calculated with DFT methods in this work with definition of the nomenclature of the structures of local minima and transition states.**



**Table S4: Absolute (in au) energies and free energies of UB3LYP/BS1 optimized geometries along the reaction mechanisms calculated for KDO5 in Gaussian-09. Gc is the free energy correction at 298 K.**

| Model 1                          | E [BS1, au]   | ZPE [au] | G [au]        | E [BS2, au]   | Gc [au]  |
|----------------------------------|---------------|----------|---------------|---------------|----------|
| <sup>5</sup> Re <sub>A</sub>     | -7650.646028  | 2.507816 | -7648.378123  | -7652.729653  | 2.267905 |
| <sup>5</sup> TS1 <sub>A,C5</sub> | -7650.610004  | 2.498905 | -7648.353059  | -7652.697867  | 2.256945 |
| <sup>5</sup> IM1 <sub>A,C5</sub> | -7650.641737  | 2.504120 | -7648.375615  | -7652.728843  | 2.266114 |
| <sup>5</sup> TS2 <sub>A,C5</sub> | -7650.621548  | 2.503945 | -7648.356197  | -7652.707399  | 2.265456 |
| <sup>5</sup> Pr <sub>A,C5</sub>  | -7650.729836  | 2.509469 | -7648.456352  | -7652.813251  | 2.273280 |
| <sup>5</sup> TS1 <sub>A,C4</sub> | -7650.605494  | 2.499527 | -7648.343429  | -7652.694329  | 2.262057 |
| <sup>5</sup> IM1 <sub>A,C4</sub> | -7650.642883  | 2.503369 | -7648.377702  | -7652.730585  | 2.265126 |
| <sup>5</sup> TS2 <sub>A,C4</sub> | -7650.625957  | 2.501926 | -7648.362692  | -7652.715353  | 2.262899 |
| <sup>5</sup> Pr <sub>A,C4</sub>  | -7650.735192  | 2.508804 | -7648.464784  | -7652.822205  | 2.270259 |
| <sup>5</sup> TS1 <sub>A,C3</sub> | -7650.607613  | 2.498632 | -7648.353178  | -7652.692831  | 2.254407 |
| <sup>5</sup> IM1 <sub>A,C3</sub> | -7650.641982  | 2.503959 | -7648.376087  | -7652.730180  | 2.265909 |
| <sup>5</sup> TS2 <sub>A,C3</sub> | -7650.637967  | 2.502395 | -7648.374000  | -7652.722477  | 2.263792 |
| <sup>5</sup> Pr <sub>A,C3</sub>  | -7650.719555  | 2.508531 | -7648.447306  | -7652.802216  | 2.272007 |
| Model 2                          |               |          |               |               |          |
| <sup>5</sup> Re <sub>B</sub>     | -8063.345994  | 2.635052 | -8060.956658  | -8065.676410  | 2.389239 |
| <sup>5</sup> TS1 <sub>B,C5</sub> | -8063.314679  | 2.628298 | -8060.923727  | -8065.648193  | 2.390679 |
| <sup>5</sup> IM1 <sub>B,C5</sub> | -8063.350480  | 2.631786 | -8060.965946  | -8065.687672  | 2.384390 |
| <sup>5</sup> TS2 <sub>B,C5</sub> | -8063.337647  | 2.631481 | -8060.946380  | -8065.667092  | 2.391106 |
| <sup>5</sup> Pr <sub>B,C5</sub>  | -8063.430289  | 2.636468 | -8061.039137  | -8065.754705  | 2.391144 |
| <sup>5</sup> TS1 <sub>B,C4</sub> | -8063.310985  | 2.630503 | -8060.920033  | -8065.633251  | 2.390936 |
| <sup>5</sup> IM1 <sub>B,C4</sub> | -8063.354446  | 2.633997 | -8060.964838  | -8065.683408  | 2.389364 |
| <sup>5</sup> TS2 <sub>B,C4</sub> | -8063.334099  | 2.633260 | -8060.943995  | -8065.662965  | 2.389808 |
| <sup>5</sup> Pr <sub>B,C4</sub>  | -8063.442634  | 2.640735 | -8061.039116  | -8065.748459  | 2.403373 |
| <sup>5</sup> TS1 <sub>B,C3</sub> | -8063.307444  | 2.628488 | -8060.919484  | -8065.630661  | 2.387755 |
| <sup>5</sup> IM1 <sub>B,C3</sub> | -8063.364949  | 2.631786 | -8060.975699  | -8065.688797  | 2.389035 |
| <sup>5</sup> TS2 <sub>B,C3</sub> | -8063.344781  | 2.633608 | -8060.943012  | -8065.652929  | 2.401419 |
| <sup>5</sup> Pr <sub>B,C3</sub>  | -8063.430289  | 2.637738 | -8061.031498  | -8065.732990  | 2.399506 |
| Model 3                          |               |          |               |               |          |
| <sup>1</sup> Re <sub>C</sub>     | -11045.049473 | 3.468631 | -11041.848519 | -11056.082383 | 3.201001 |
| <sup>3</sup> Re <sub>C</sub>     | -11045.076807 | 3.469389 | -11041.876789 | -11056.110260 | 3.199625 |
| <sup>5</sup> Re <sub>C</sub>     | -11045.085570 | 3.468591 | -11041.888015 | -11056.117861 | 3.197507 |
| <sup>5</sup> TS1 <sub>C,C5</sub> | -11045.040713 | 3.461841 | -11041.848896 | -11056.068558 | 3.191272 |
| <sup>5</sup> IM1 <sub>C,C5</sub> | -11045.046489 | 3.463608 | -11041.846505 | -11056.078657 | 3.199610 |
| <sup>5</sup> Pr <sub>C,C5</sub>  | -11045.134049 | 3.469995 | -11041.930091 | -11056.156385 | 3.203388 |
| <sup>5</sup> TS1 <sub>C,C4</sub> | -11045.043038 | 3.462502 | -11041.851395 | -11056.072437 | 3.191642 |
| <sup>5</sup> IM1 <sub>C,C4</sub> | -11045.047015 | 3.464278 | -11041.849144 | -11056.078397 | 3.197707 |
| <sup>5</sup> Pr <sub>C,C4</sub>  | -11045.132566 | 3.469799 | -11041.927643 | -11056.154066 | 3.204616 |
| <sup>5</sup> TS1 <sub>C,C3</sub> | -11045.041669 | 3.466475 | -11041.842899 | -11056.073214 | 3.198467 |
| <sup>5</sup> IM1 <sub>C,C3</sub> | -11045.046998 | 3.462083 | -11041.859441 | -11056.085439 | 3.187202 |
| <sup>5</sup> TS2 <sub>C,C3</sub> | -11045.043761 | 3.463368 | -11041.853183 | -11056.085486 | 3.190121 |

|                                 |               |          |               |               |          |
|---------------------------------|---------------|----------|---------------|---------------|----------|
| <sup>5</sup> Pr <sub>C,C3</sub> | -11045.085273 | 3.467007 | -11041.891361 | -11056.123567 | 3.193559 |
|---------------------------------|---------------|----------|---------------|---------------|----------|

**Table S5: Relative (in kcal mol<sup>-1</sup>) energies and free energies of UB3LYP/BS1 optimized geometries along the reaction mechanisms calculated for KDO5 in Gaussian-09.**

| Model 1                          | $\Delta E$ [BS1] | $\Delta E+ZPE$ | $\Delta G$ [BS1] | $\Delta E$ [BS2] | $\Delta E+ZPE$ | $\Delta G$ [BS2] |
|----------------------------------|------------------|----------------|------------------|------------------|----------------|------------------|
| <sup>5</sup> Re <sub>A</sub>     | 0.00             | 0.00           | 0.00             | 0.00             | 0.00           | 0.00             |
| <sup>5</sup> TS1 <sub>A,C5</sub> | 22.61            | 17.01          | 15.73            | 19.95            | 14.35          | 13.07            |
| <sup>5</sup> IM1 <sub>A,C5</sub> | 2.69             | 0.37           | 1.57             | 0.51             | -1.81          | -0.62            |
| <sup>5</sup> TS2 <sub>A,C5</sub> | 15.36            | 12.93          | 13.76            | 13.96            | 11.54          | 12.43            |
| <sup>5</sup> Pr <sub>A,C5</sub>  | -52.59           | -51.55         | -49.09           | -52.46           | -51.42         | -49.09           |
| <sup>5</sup> TS1 <sub>A,C4</sub> | 25.44            | 20.23          | 21.77            | 22.17            | 16.96          | 18.50            |
| <sup>5</sup> IM1 <sub>A,C4</sub> | 1.97             | -0.82          | 0.26             | -0.58            | -3.38          | -2.33            |
| <sup>5</sup> TS2 <sub>A,C4</sub> | 12.59            | 8.90           | 9.68             | 8.97             | 5.28           | 5.83             |
| <sup>5</sup> Pr <sub>A,C4</sub>  | -55.95           | -55.33         | -54.38           | -58.08           | -57.46         | -56.60           |
| <sup>5</sup> TS1 <sub>A,C3</sub> | 24.11            | 18.34          | 15.65            | 23.11            | 17.34          | 14.64            |
| <sup>5</sup> IM1 <sub>A,C3</sub> | 2.54             | 0.12           | 1.28             | -0.33            | -2.75          | -1.58            |
| <sup>5</sup> TS2 <sub>A,C3</sub> | 5.06             | 1.66           | 2.59             | 4.50             | 1.10           | 1.92             |
| <sup>5</sup> Pr <sub>A,C3</sub>  | -46.14           | -45.69         | -43.41           | -45.53           | -45.09         | -42.96           |
| Model 2                          |                  |                |                  |                  |                |                  |
| <sup>5</sup> Re <sub>B</sub>     | 0.00             | 0.00           | 0.00             | 0.00             | 0.00           | 0.00             |
| <sup>5</sup> TS1 <sub>B,C5</sub> | 19.65            | 15.41          | 20.66            | 17.71            | 13.47          | 18.61            |
| <sup>5</sup> IM1 <sub>B,C5</sub> | -2.82            | -4.86          | -5.83            | -7.07            | -9.12          | -10.11           |
| <sup>5</sup> TS2 <sub>B,C5</sub> | 5.24             | 3.00           | 6.45             | 5.85             | 3.61           | 7.02             |
| <sup>5</sup> Pr <sub>B,C5</sub>  | -52.90           | -52.01         | -51.76           | -49.13           | -48.24         | -47.94           |
| <sup>5</sup> TS1 <sub>B,C4</sub> | 21.97            | 19.11          | 22.98            | 27.08            | 24.23          | 28.15            |
| <sup>5</sup> IM1 <sub>B,C4</sub> | -5.30            | -5.97          | -5.13            | -4.39            | -5.05          | -4.31            |
| <sup>5</sup> TS2 <sub>B,C4</sub> | 7.46             | 6.34           | 7.95             | 8.44             | 7.31           | 8.79             |
| <sup>5</sup> Pr <sub>B,C4</sub>  | -60.64           | -57.08         | -51.74           | -45.21           | -41.65         | -36.34           |
| <sup>5</sup> TS1 <sub>B,C3</sub> | 24.19            | 20.07          | 23.33            | 28.71            | 24.59          | 27.78            |
| <sup>5</sup> IM1 <sub>B,C3</sub> | -11.89           | -13.94         | -11.95           | -7.77            | -9.82          | -7.90            |
| <sup>5</sup> TS2 <sub>B,C3</sub> | 0.76             | -0.14          | 8.56             | 14.73            | 13.83          | 22.38            |
| <sup>5</sup> Pr <sub>B,C3</sub>  | -52.90           | -51.21         | -46.96           | -35.50           | -33.82         | -29.06           |
| Model 3                          |                  |                |                  |                  |                |                  |
| <sup>1</sup> Re <sub>C</sub>     | 22.65            | 22.68          | 24.78            | 22.26            | 22.29          | 24.46            |
| <sup>3</sup> Re <sub>C</sub>     | 5.50             | 6.00           | 7.04             | 4.77             | 5.27           | 6.10             |
| <sup>5</sup> Re <sub>C</sub>     | 0.00             | 0.00           | 0.00             | 0.00             | 0.00           | 0.00             |
| <sup>5</sup> TS1 <sub>C,C5</sub> | 28.15            | 23.91          | 24.55            | 30.94            | 26.70          | 27.03            |
| <sup>5</sup> IM1 <sub>C,C5</sub> | 24.52            | 21.40          | 26.05            | 24.60            | 21.47          | 25.92            |
| <sup>5</sup> Pr <sub>C,C5</sub>  | -30.42           | -29.54         | -26.40           | -24.17           | -23.29         | -20.48           |
| <sup>5</sup> TS1 <sub>C,C4</sub> | 26.69            | 22.87          | 22.98            | 28.50            | 24.68          | 24.82            |
| <sup>5</sup> IM1 <sub>C,C4</sub> | 24.19            | 21.49          | 24.39            | 24.76            | 22.06          | 24.89            |
| <sup>5</sup> Pr <sub>C,C4</sub>  | -29.49           | -28.73         | -24.87           | -22.72           | -21.96         | -18.26           |
| <sup>5</sup> TS1 <sub>C,C3</sub> | 27.55            | 26.22          | 28.31            | 28.02            | 26.69          | 28.62            |
| <sup>5</sup> IM1 <sub>C,C3</sub> | 24.20            | 20.12          | 17.93            | 20.35            | 16.26          | 13.88            |

|                                 |       |       |       |       |       |       |
|---------------------------------|-------|-------|-------|-------|-------|-------|
| <sup>5</sup> TS <sub>C,C3</sub> | 26.23 | 22.96 | 21.86 | 20.32 | 17.04 | 15.68 |
| <sup>5</sup> Pr <sub>C,C3</sub> | 0.19  | -0.81 | -2.10 | -3.58 | -4.58 | -6.06 |

**Table S6: Group charges and group spin densities of UB3LYP/BS1 optimized geometries along the reaction mechanisms calculated for KDO5 in Gaussian-09.**

| Charge                            | Fe   | O     | Succ  | SubH | Prot  | Wat   | Total |
|-----------------------------------|------|-------|-------|------|-------|-------|-------|
| <b>Model 1</b>                    |      |       |       |      |       |       |       |
| <sup>5</sup> Re <sub>A</sub>      | 0.71 | -0.40 | -0.34 | 0.71 | -1.68 | 0.00  | -1.00 |
| <sup>5</sup> TS <sub>1,A,C5</sub> | 0.80 | -0.61 | -0.38 | 0.95 | -1.77 | 0.00  | -1.00 |
| <sup>5</sup> IM <sub>1,A,C5</sub> | 0.81 | -0.81 | -0.41 | 1.20 | -1.80 | 0.00  | -1.00 |
| <sup>5</sup> TS <sub>2,A,C5</sub> | 0.61 | -0.77 | -0.48 | 1.49 | -1.85 | 0.00  | -1.00 |
| <sup>5</sup> Pr <sub>A,C5</sub>   | 0.58 | -0.69 | -0.49 | 1.50 | -1.90 | 0.00  | -1.00 |
| <sup>5</sup> TS <sub>1,A,C4</sub> | 0.80 | -0.60 | -0.36 | 0.91 | -1.75 | 0.00  | -1.00 |
| <sup>5</sup> IM <sub>1,A,C4</sub> | 0.81 | -0.81 | -0.40 | 1.19 | -1.80 | 0.00  | -1.00 |
| <sup>5</sup> TS <sub>2,A,C4</sub> | 0.81 | -0.78 | -0.36 | 1.17 | -1.83 | 0.00  | -1.00 |
| <sup>5</sup> Pr <sub>A,C4</sub>   | 0.56 | -0.67 | -0.55 | 1.47 | -1.81 | 0.00  | -1.00 |
| <sup>5</sup> TS <sub>1,A,C3</sub> | 0.80 | -0.63 | -0.36 | 0.97 | -1.79 | 0.00  | -1.00 |
| <sup>5</sup> IM <sub>1,A,C3</sub> | 0.81 | -0.81 | -0.40 | 1.18 | -1.79 | 0.00  | -1.00 |
| <sup>5</sup> TS <sub>2,A,C3</sub> | 0.63 | -0.74 | -0.47 | 1.51 | -1.94 | 0.00  | -1.00 |
| <sup>5</sup> Pr <sub>A,C3</sub>   | 0.62 | -0.68 | -0.47 | 1.49 | -1.96 | 0.00  | -1.00 |
| <b>Model 2</b>                    |      |       |       |      |       |       |       |
| <sup>5</sup> Re <sub>B</sub>      | 0.83 | -0.50 | -0.42 | 0.72 | -0.64 | 0.00  | 0.00  |
| <sup>5</sup> TS <sub>1,B,C5</sub> | 0.84 | -0.62 | -0.35 | 0.91 | -0.78 | 0.00  | 0.00  |
| <sup>5</sup> IM <sub>1,B,C5</sub> | 0.87 | -0.81 | -0.36 | 1.12 | -0.82 | 0.00  | 0.00  |
| <sup>5</sup> TS <sub>2,B,C5</sub> | 0.61 | -0.77 | -0.49 | 1.62 | -0.97 | 0.00  | 0.00  |
| <sup>5</sup> Pr <sub>B,C5</sub>   | 0.80 | -0.72 | -0.54 | 1.39 | -0.94 | 0.00  | 0.00  |
| <sup>5</sup> TS <sub>1,B,C4</sub> | 0.70 | -0.70 | -0.36 | 1.09 | -0.73 | 0.00  | 0.00  |
| <sup>5</sup> IM <sub>1,B,C4</sub> | 0.79 | -0.80 | -0.47 | 1.13 | -0.66 | 0.00  | 0.00  |
| <sup>5</sup> TS <sub>2,B,C4</sub> | 0.83 | -0.78 | -0.51 | 1.32 | -0.86 | 0.00  | 0.00  |
| <sup>5</sup> Pr <sub>B,C4</sub>   | 0.72 | -0.69 | -0.52 | 1.40 | -0.91 | 0.00  | 0.00  |
| <sup>5</sup> TS <sub>1,B,C3</sub> | 0.80 | -0.65 | -0.37 | 1.03 | -0.81 | 0.00  | 0.00  |
| <sup>5</sup> IM <sub>1,B,C3</sub> | 0.85 | -0.81 | -0.37 | 1.12 | -0.79 | 0.00  | 0.00  |
| <sup>5</sup> TS <sub>2,B,C3</sub> | 0.74 | -0.73 | -0.42 | 1.30 | -0.89 | 0.00  | 0.00  |
| <sup>5</sup> Pr <sub>B,C3</sub>   | 0.65 | -0.66 | -0.46 | 1.44 | -0.98 | 0.00  | 0.00  |
| <b>Model 3</b>                    |      |       |       |      |       |       |       |
| <sup>5</sup> Re <sub>C</sub>      | 0.89 | -0.72 | -0.48 | 0.06 | 1.94  | 0.30  | 2.00  |
| <sup>1</sup> Re <sub>C</sub>      | 0.76 | -1.06 | -0.55 | 0.12 | 2.76  | -0.02 | 2.00  |
| <sup>3</sup> Re <sub>C</sub>      | 0.96 | -1.05 | -0.54 | 0.11 | 2.51  | 0.01  | 2.00  |
| <sup>7</sup> Re <sub>C</sub>      | 1.08 | -1.06 | -0.59 | 0.10 | 2.47  | 0.00  | 2.00  |
| <sup>5</sup> TS <sub>1,C,C5</sub> | 0.75 | -0.62 | -0.52 | 0.20 | 1.84  | 0.35  | 2.00  |
| <sup>5</sup> IM <sub>1,C,C5</sub> | 0.89 | -0.53 | -0.44 | 0.27 | 1.21  | 0.59  | 2.00  |
| <sup>5</sup> Pr <sub>C,C5</sub>   | 0.81 | -0.43 | -0.48 | 0.56 | 1.22  | 0.32  | 2.00  |
| <sup>5</sup> TS <sub>1,C,C4</sub> | 0.75 | -0.65 | -0.49 | 0.01 | 2.00  | 0.38  | 2.00  |
| <sup>5</sup> IM <sub>1,C,C4</sub> | 0.89 | -0.54 | -0.44 | 0.19 | 1.57  | 0.34  | 2.00  |

|                                       |      |       |       |       |      |      |       |
|---------------------------------------|------|-------|-------|-------|------|------|-------|
| <sup>5</sup> Pr <sub>C,C4</sub>       | 0.85 | -0.44 | -0.52 | 0.48  | 1.27 | 0.36 | 2.00  |
| <sup>5</sup> TS1 <sub>C,C3</sub>      | 0.74 | -0.63 | -0.50 | -0.03 | 2.06 | 0.36 | 2.00  |
| <sup>5</sup> IM1 <sub>C,C3</sub>      | 0.81 | -0.58 | -0.53 | 0.13  | 1.96 | 0.21 | 2.00  |
| <sup>5</sup> Pr <sub>C,C3</sub>       | 0.75 | -0.49 | -0.54 | 0.59  | 1.37 | 0.33 | 2.00  |
| <sup>5</sup> Re <sub>C,PBE0</sub>     | 0.99 | -1.05 | -0.57 | 0.04  | 2.58 | 0.01 | 2.00  |
| <sup>3</sup> Re <sub>C,PBE0</sub>     | 0.82 | -1.02 | -0.50 | 0.05  | 2.63 | 0.02 | 2.00  |
| <sup>5</sup> TS1 <sub>C,C3,PBE0</sub> | 0.73 | -0.93 | -0.56 | 0.05  | 2.69 | 0.03 | 2.00  |
| <sup>5</sup> TS1 <sub>C,C4,PBE0</sub> | 0.93 | -1.04 | -0.63 | -0.05 | 2.72 | 0.07 | 2.00  |
| <sup>5</sup> TS1 <sub>C,C5,PBE0</sub> | 0.88 | -0.98 | -0.65 | 0.25  | 2.43 | 0.07 | 2.00  |
| <sup>5</sup> Re <sub>C,Solv</sub>     | 1.13 | -1.07 | -0.59 | 0.11  | 2.43 | 0.00 | 2.00  |
| <sup>5</sup> TS1 <sub>C,C3,Solv</sub> | 0.87 | -0.97 | -0.58 | 0.12  | 2.55 | 0.01 | 2.00  |
| <sup>5</sup> TS1 <sub>C,C4,Solv</sub> | 1.10 | -1.07 | -0.65 | 0.02  | 2.56 | 0.05 | 2.00  |
| <sup>5</sup> TS1 <sub>C,C5,Solv</sub> | 1.05 | -1.02 | -0.67 | 0.31  | 2.28 | 0.05 | 2.00  |
|                                       |      |       |       |       |      |      |       |
| Spin density                          | Fe   | O     | Succ  | SubH  | Prot | Wat  | Total |
| Model 1                               |      |       |       |       |      |      |       |
| <sup>5</sup> Re <sub>A</sub>          | 3.00 | 0.67  | 0.14  | 0.00  | 0.19 | 0.00 | 4.00  |
| <sup>5</sup> TS1 <sub>A,C5</sub>      | 3.89 | 0.01  | 0.20  | -0.36 | 0.26 | 0.00 | 4.00  |
| <sup>5</sup> IM1 <sub>A,C5</sub>      | 4.05 | 0.44  | 0.19  | -0.99 | 0.31 | 0.00 | 4.00  |
| <sup>5</sup> TS2 <sub>A,C5</sub>      | 3.73 | -0.06 | 0.08  | 0.14  | 0.12 | 0.00 | 4.00  |
| <sup>5</sup> Pr <sub>A,C5</sub>       | 3.75 | 0.02  | 0.08  | 0.00  | 0.14 | 0.00 | 4.00  |
| <sup>5</sup> TS1 <sub>A,C4</sub>      | 3.81 | 0.06  | 0.19  | -0.31 | 0.25 | 0.00 | 4.00  |
| <sup>5</sup> IM1 <sub>A,C4</sub>      | 4.05 | 0.44  | 0.19  | -0.99 | 0.31 | 0.00 | 4.00  |
| <sup>5</sup> TS2 <sub>A,C4</sub>      | 4.06 | 0.42  | 0.21  | -0.99 | 0.31 | 0.00 | 4.00  |
| <sup>5</sup> Pr <sub>A,C4</sub>       | 3.76 | 0.02  | 0.07  | 0.00  | 0.15 | 0.00 | 4.00  |
| <sup>5</sup> TS1 <sub>A,C3</sub>      | 3.82 | 0.13  | 0.17  | -0.39 | 0.26 | 0.00 | 4.00  |
| <sup>5</sup> IM1 <sub>A,C3</sub>      | 4.05 | 0.43  | 0.19  | -0.99 | 0.31 | 0.00 | 4.00  |
| <sup>5</sup> TS2 <sub>A,C3</sub>      | 3.71 | -0.15 | 0.07  | 0.26  | 0.12 | 0.00 | 4.00  |
| <sup>5</sup> Pr <sub>A,C3</sub>       | 3.77 | 0.01  | 0.08  | 0.01  | 0.14 | 0.00 | 4.00  |
| Model 2                               |      |       |       |       |      |      |       |
| <sup>5</sup> Re <sub>B</sub>          | 2.98 | 0.68  | 0.14  | 0.00  | 0.19 | 0.00 | 4.00  |
| <sup>5</sup> TS1 <sub>B,C5</sub>      | 3.77 | 0.02  | 0.18  | -0.25 | 0.28 | 0.00 | 4.00  |
| <sup>5</sup> IM1 <sub>B,C5</sub>      | 4.07 | 0.31  | 0.23  | -0.99 | 0.38 | 0.00 | 4.00  |
| <sup>5</sup> TS2 <sub>B,C5</sub>      | 3.74 | 0.00  | 0.07  | 0.04  | 0.15 | 0.00 | 4.00  |
| <sup>5</sup> Pr <sub>B,C5</sub>       | 3.69 | 0.00  | 0.11  | 0.00  | 0.20 | 0.00 | 4.00  |
| <sup>5</sup> TS1 <sub>B,C4</sub>      | 2.83 | 0.37  | 0.07  | 0.64  | 0.10 | 0.00 | 4.00  |
| <sup>5</sup> IM1 <sub>B,C4</sub>      | 2.75 | 0.07  | 0.02  | 0.99  | 0.16 | 0.00 | 4.00  |
| <sup>5</sup> TS2 <sub>B,C4</sub>      | 3.94 | 0.38  | 0.14  | -0.72 | 0.25 | 0.00 | 4.00  |
| <sup>5</sup> Pr <sub>B,C4</sub>       | 3.74 | 0.00  | 0.09  | 0.00  | 0.16 | 0.00 | 4.00  |
| <sup>5</sup> TS1 <sub>B,C3</sub>      | 3.95 | 0.09  | 0.16  | -0.49 | 0.29 | 0.00 | 4.00  |
| <sup>5</sup> IM1 <sub>B,C3</sub>      | 4.08 | 0.35  | 0.18  | -0.99 | 0.39 | 0.00 | 4.00  |
| <sup>5</sup> TS2 <sub>B,C3</sub>      | 3.93 | 0.36  | 0.11  | -0.63 | 0.22 | 0.00 | 4.00  |
| <sup>5</sup> Pr <sub>B,C3</sub>       | 3.76 | 0.01  | 0.07  | 0.00  | 0.15 | 0.00 | 4.00  |
| Model 3                               |      |       |       |       |      |      |       |

|                                       |      |       |       |       |       |       |      |
|---------------------------------------|------|-------|-------|-------|-------|-------|------|
| <sup>5</sup> Re <sub>C</sub>          | 4.14 | 0.51  | 0.11  | 0.00  | -0.78 | 0.01  | 4.00 |
| <sup>1</sup> Re <sub>C</sub>          | 0.93 | 0.11  | -0.01 | 0.00  | -1.03 | 0.00  | 0.00 |
| <sup>3</sup> Re <sub>C</sub>          | 2.75 | 0.23  | -0.03 | 0.00  | -0.96 | 0.01  | 2.00 |
| <sup>7</sup> Re <sub>C</sub>          | 4.14 | 0.51  | 0.11  | 0.00  | 1.22  | 0.02  | 6.00 |
| <sup>5</sup> TS1 <sub>C,C5</sub>      | 3.61 | -0.40 | 0.00  | -0.32 | 1.10  | 0.01  | 4.00 |
| <sup>5</sup> IM1 <sub>C,C5</sub>      | 4.25 | 0.21  | 0.15  | -0.95 | 0.36  | -0.03 | 4.00 |
| <sup>5</sup> Pr <sub>C,C5</sub>       | 3.78 | 0.00  | 0.06  | 0.00  | 0.16  | 0.00  | 4.00 |
| <sup>5</sup> TS1 <sub>C,C4</sub>      | 4.11 | 0.44  | 0.09  | 0.14  | -0.79 | 0.01  | 4.00 |
| <sup>5</sup> IM1 <sub>C,C4</sub>      | 4.26 | 0.19  | 0.14  | -0.96 | 0.38  | 0.00  | 4.00 |
| <sup>5</sup> Pr <sub>C,C4</sub>       | 3.80 | 0.00  | 0.05  | 0.00  | 0.12  | 0.02  | 4.00 |
| <sup>5</sup> TS1 <sub>C,C3</sub>      | 2.87 | 0.13  | -0.03 | -0.02 | 1.04  | 0.01  | 4.00 |
| <sup>5</sup> IM1 <sub>C,C3</sub>      | 3.81 | 0.03  | 0.05  | -1.04 | 1.15  | 0.00  | 4.00 |
| <sup>5</sup> Pr <sub>C,C3</sub>       | 3.80 | 0.02  | 0.05  | 0.01  | 0.12  | 0.00  | 4.00 |
| <sup>5</sup> Re <sub>C,PBE0</sub>     | 4.23 | 0.47  | 0.09  | 0.00  | -0.82 | 0.02  | 4.00 |
| <sup>3</sup> Re <sub>C,PBE0</sub>     | 2.85 | 0.17  | -0.04 | 0.00  | -0.98 | 0.01  | 2.00 |
| <sup>5</sup> TS1 <sub>C,C3,PBE0</sub> | 2.99 | 0.04  | -0.03 | -0.04 | 1.01  | 0.02  | 4.00 |
| <sup>5</sup> TS1 <sub>C,C4,PBE0</sub> | 4.20 | 0.41  | 0.07  | 0.13  | -0.83 | 0.01  | 4.00 |
| <sup>5</sup> TS1 <sub>C,C5,PBE0</sub> | 3.71 | -0.45 | 0.00  | -0.35 | 1.08  | 0.01  | 4.00 |
| <sup>5</sup> Re <sub>C,Solv</sub>     | 4.15 | 0.50  | 0.11  | 0.00  | -0.78 | 0.02  | 4.00 |
| <sup>5</sup> TS1 <sub>C,C3,Solv</sub> | 2.85 | 0.14  | -0.02 | -0.01 | 1.04  | 0.02  | 4.00 |
| <sup>5</sup> TS1 <sub>C,C4,Solv</sub> | 4.12 | 0.43  | 0.09  | 0.13  | -0.79 | 0.01  | 4.00 |
| <sup>5</sup> TS1 <sub>C,C5,Solv</sub> | 3.58 | -0.38 | 0.00  | -0.32 | 1.10  | 0.01  | 4.00 |

**Table S7: UPBE0/BS2 single-point calculations on the optimized UB3LYP/BS1 geometries for model C. ZPE, thermal and entropic corrections taken from the UB3LYP/BS1 frequency calculations.**

|                                       | E [BS2, au]   | $\Delta E + ZPE$<br>[kcal mol <sup>-1</sup> ] | $\Delta G$<br>[kcal mol <sup>-1</sup> ] |
|---------------------------------------|---------------|-----------------------------------------------|-----------------------------------------|
| <sup>3</sup> Re <sub>C,PBE0</sub>     | -11044.291712 | 8.93                                          | 9.76                                    |
| <sup>5</sup> Re <sub>C,PBE0</sub>     | -11044.305142 | 0.00                                          | 0.00                                    |
| <sup>5</sup> TS1 <sub>C,C3,PBE0</sub> | -11044.256874 | 28.96                                         | 30.89                                   |
| <sup>5</sup> TS1 <sub>C,C4,PBE0</sub> | -11044.262420 | 22.99                                         | 23.13                                   |
| <sup>5</sup> TS1 <sub>C,C5,PBE0</sub> | -11044.255177 | 27.12                                         | 27.44                                   |

**Table S8: UB3LYP/BS2(solvent) single-point calculations on the optimized UB3LYP/BS1 geometries for model C. Self-consistent reaction field model with dielectric constant for chlorobenzene used. ZPE, thermal and entropic corrections taken from the UB3LYP/BS1 frequency calculations.**

|                                       | E [BS2, au]   | $\Delta E + ZPE$<br>[kcal mol <sup>-1</sup> ] | $\Delta G$<br>[kcal mol <sup>-1</sup> ] |
|---------------------------------------|---------------|-----------------------------------------------|-----------------------------------------|
| <sup>5</sup> Re <sub>C,Solv</sub>     | -11056.298612 | 0.00                                          | 0.00                                    |
| <sup>5</sup> TS1 <sub>C,C3,Solv</sub> | -11056.251448 | 28.27                                         | 30.20                                   |
| <sup>5</sup> TS1 <sub>C,C4,Solv</sub> | -11056.251355 | 25.83                                         | 25.97                                   |
| <sup>5</sup> TS1 <sub>C,C5,Solv</sub> | -11056.248900 | 26.96                                         | 27.28                                   |

**Table S9: UB3LYP/BS2 calculated triplet-quintet energies for model A and B. Triplet and quintet spin geometry optimizations done.**

|                              | E [BS2, au]  | $\Delta E$<br>[kcal mol <sup>-1</sup> ] |
|------------------------------|--------------|-----------------------------------------|
| <sup>5</sup> Re <sub>A</sub> | -7650.646028 | 0.00                                    |
| <sup>3</sup> Re <sub>A</sub> | -7650.639200 | 4.28                                    |
| <sup>5</sup> Re <sub>B</sub> | -9198.999783 | 0.00                                    |
| <sup>3</sup> Re <sub>B</sub> | -9198.984363 | 9.68                                    |

**Table S10: Absolute (in au) energies of UB3LYP/6-311+G\* calculated diabatic BDE values for an isolated lysine molecule for the C-H bond strength for the C<sub>3</sub>, C<sub>4</sub> and C<sub>5</sub> position under an applied electric field ranging from -200 au to 200 au along the X, Y or Z axis.**

| Field direction and strength | E [6-311+G*, au] |                         |                         |                         |
|------------------------------|------------------|-------------------------|-------------------------|-------------------------|
|                              | Reactant         | C <sub>3</sub> -radical | C <sub>4</sub> -radical | C <sub>5</sub> -radical |
| X-200                        | -497.687         | -497.037                | -497.040                | -497.030                |
| X-150                        | -497.636         | -496.987                | -496.989                | -496.982                |
| X-100                        | -497.588         | -496.940                | -496.941                | -496.937                |
| X-50                         | -497.542         | -496.896                | -496.895                | -496.895                |
| X-0                          | -497.500         | -496.854                | -496.853                | -496.855                |
| X+50                         | -497.460         | -496.816                | -496.813                | -496.819                |
| X+100                        | -497.423         | -496.781                | -496.777                | -496.789                |
| X+150                        | -497.395         | -496.764                | -496.754                | -496.771                |
| X+200                        | -497.388         | -496.772                | -496.758                | -496.773                |
| Y-200                        | -497.492         | -496.857                | -496.852                | -496.850                |
| Y-150                        | -497.490         | -496.852                | -496.849                | -496.848                |
| Y-100                        | -497.491         | -496.851                | -496.848                | -496.848                |
| Y-50                         | -497.494         | -496.852                | -496.849                | -496.851                |
| Y-0                          | -497.500         | -496.854                | -496.853                | -496.855                |
| Y+50                         | -497.507         | -496.860                | -496.859                | -496.862                |
| Y+100                        | -497.516         | -496.867                | -496.866                | -496.871                |
| Y+150                        | -497.528         | -496.877                | -496.876                | -496.883                |
| Y+200                        | -497.542         | -496.889                | -496.888                | -496.896                |
| Z-200                        | -497.510         | -496.872                | -496.869                | -496.862                |
| Z-150                        | -497.505         | -496.865                | -496.862                | -496.857                |
| Z-100                        | -497.501         | -496.859                | -496.857                | -496.854                |
| Z-50                         | -497.499         | -496.856                | -496.854                | -496.854                |
| Z-0                          | -497.500         | -496.854                | -496.853                | -496.855                |
| Z+50                         | -497.502         | -496.855                | -496.854                | -496.859                |
| Z+100                        | -497.506         | -496.858                | -496.856                | -496.864                |
| Z+150                        | -497.512         | -496.862                | -496.861                | -496.871                |
| Z+200                        | -497.520         | -496.869                | -496.868                | -496.881                |

**Table S11: Relative (in kcal/mol) energies of UB3LYP/6-311+G\* calculated diabatic BDE values for an isolated lysine molecule for the C-H bond strength for the C<sub>3</sub>, C<sub>4</sub> and C<sub>5</sub> position under an applied electric field ranging from -200 au to 200 au along the X, Y or Z axis.**

| Electric Field Strength<br>[in au] | BDE [6-311+G*, kcal/mol] |                |                |
|------------------------------------|--------------------------|----------------|----------------|
|                                    | C <sub>3</sub>           | C <sub>4</sub> | C <sub>5</sub> |
| X-200                              | 93.15                    | 91.25          | 97.56          |
| X-150                              | 92.63                    | 91.44          | 95.81          |
| X-100                              | 92.04                    | 91.57          | 94.01          |
| X-50                               | 91.37                    | 91.62          | 92.12          |
| X-0                                | 90.60                    | 91.60          | 90.10          |
| X+50                               | 89.71                    | 91.47          | 87.76          |
| X+100                              | 88.24                    | 91.17          | 83.72          |
| X+150                              | 81.99                    | 87.71          | 77.56          |
| X+200                              | 72.49                    | 81.10          | 71.62          |
| Y-200                              | 84.34                    | 87.06          | 88.41          |
| Y-150                              | 86.10                    | 88.24          | 89.04          |
| Y-100                              | 87.70                    | 89.39          | 89.48          |
| Y-50                               | 89.19                    | 90.51          | 89.82          |
| Y-0                                | 90.60                    | 91.60          | 90.10          |
| Y+50                               | 91.93                    | 92.67          | 90.35          |
| Y+100                              | 93.20                    | 93.71          | 90.56          |
| Y+150                              | 94.40                    | 94.74          | 90.76          |
| Y+200                              | 95.54                    | 95.75          | 90.95          |
| Z-200                              | 86.40                    | 88.04          | 92.87          |
| Z-150                              | 87.51                    | 88.96          | 92.22          |
| Z-100                              | 88.58                    | 89.86          | 91.55          |
| Z-50                               | 89.61                    | 90.74          | 90.84          |
| Z-0                                | 90.60                    | 91.60          | 90.10          |
| Z+50                               | 91.55                    | 92.45          | 89.34          |
| Z+100                              | 92.45                    | 93.28          | 88.55          |
| Z+150                              | 93.30                    | 94.10          | 87.72          |
| Z+200                              | 94.11                    | 94.90          | 86.86          |



**Table S12: Absolute (in au) energies and unpaired spin contribution on Tyr<sub>233</sub> of UB3LYP/BS1 geometries for the reactant cluster model C and model C2.**

|                               | E [BS1, au] | spin on Tyr |
|-------------------------------|-------------|-------------|
| <sup>5</sup> Re <sub>C</sub>  | -11045.086  | -0.97       |
| <sup>5</sup> Re <sub>C2</sub> | -11517.444  | -0.97       |

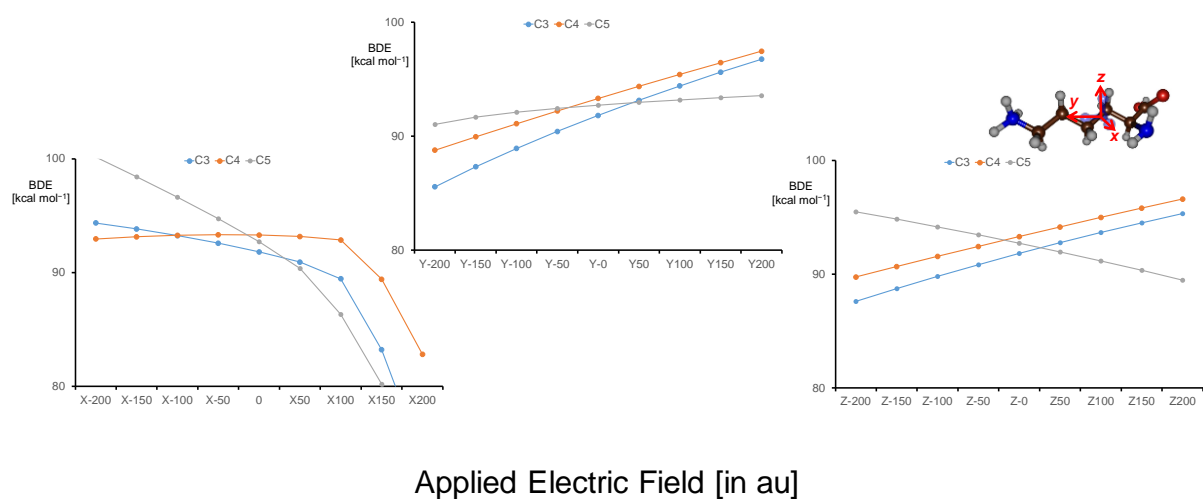

**Figure S7:** Electric field effects on the BDE values for the C<sub>3</sub>-H, C<sub>4</sub>-H and C<sub>5</sub>-H bonds of an isolated substrate molecule with an electric field applied along the x-, y- or z-direction (directions defined as in Gaussian).

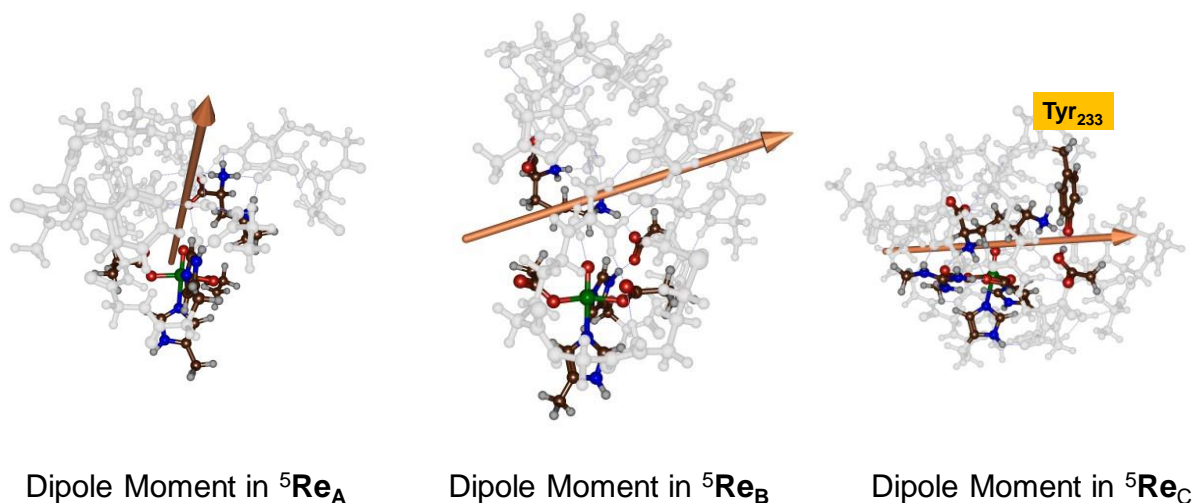

**Figure S8:** Electric dipole moment vectors in <sup>5</sup>Re<sub>A</sub>, <sup>5</sup>Re<sub>B</sub> and <sup>5</sup>Re<sub>C</sub>.

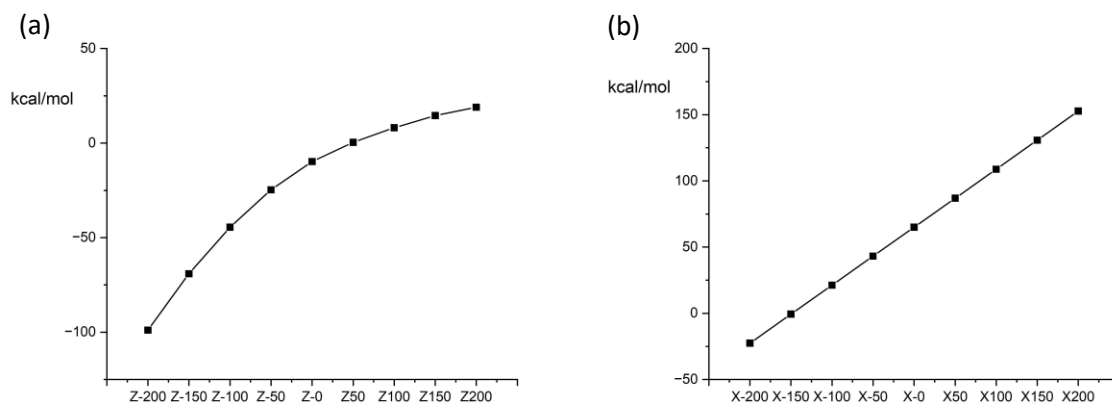

**Figure S9: (a)** Electric field effects on the iron(IV)-oxo reduction potential along the z-coordinate as calculated from the quintet/sextet energy gap. **(b)** Ionization potential of the p-cresol-acetate couple and its ability to perform PCET as calculated from the singlet/doublet energy gap.

**Cartesian coordinates of optimized geometries:****Model 1 structures:**<sup>5</sup>Re<sub>A</sub>

|   |          |          |          |
|---|----------|----------|----------|
| C | -0.29965 | 2.945358 | -4.97702 |
| H | -1.31963 | 2.565371 | -5.12216 |
| C | -0.30546 | 4.267329 | -4.20365 |
| H | 0.712471 | 4.663969 | -4.12657 |
| H | -0.88654 | 5.021322 | -4.75204 |
| C | -0.87812 | 4.112208 | -2.7889  |
| H | -1.89053 | 3.690537 | -2.82541 |
| H | -0.26057 | 3.400856 | -2.22159 |
| C | -0.90951 | 5.422891 | -2.0145  |
| O | -0.07107 | 6.317318 | -2.20906 |
| N | -1.9027  | 5.560338 | -1.10777 |
| H | -2.54684 | 4.796861 | -0.91057 |
| H | -1.91493 | 6.396984 | -0.5306  |
| C | -5.4134  | 8.980307 | -0.31534 |
| H | -6.30099 | 8.866833 | -0.94957 |
| C | -5.20849 | 7.767871 | 0.597373 |
| H | -5.07594 | 6.866644 | -0.01716 |
| H | -4.26448 | 7.891564 | 1.140952 |
| C | -6.33297 | 7.529943 | 1.564422 |
| N | -6.31975 | 6.458347 | 2.45006  |
| C | -7.44764 | 6.5237   | 3.131367 |
| H | -7.7646  | 5.833412 | 3.901334 |
| N | -8.19541 | 7.587566 | 2.740632 |
| H | -9.09994 | 7.84855  | 3.104808 |
| C | -7.49706 | 8.238785 | 1.738838 |
| H | -7.88702 | 9.118777 | 1.252231 |
| C | 3.629824 | -7.30228 | 2.476803 |
| C | 4.66022  | -6.19797 | 2.72417  |
| C | 2.454265 | -7.00273 | 1.524424 |
| O | 5.231311 | -6.12014 | 3.809324 |
| C | 1.674473 | -5.76858 | 1.87772  |
| C | 0.87233  | -5.42938 | 2.943849 |
| N | 1.693771 | -4.65101 | 1.064841 |
| C | 0.92804  | -3.70304 | 1.637685 |
| N | 0.411322 | -4.13887 | 2.785167 |
| H | 4.176381 | -8.17893 | 2.100515 |
| H | 2.814148 | -6.89666 | 0.496316 |
| H | 1.790758 | -7.87685 | 1.530653 |
| H | 0.598488 | -6.01748 | 3.807873 |
| H | 0.750809 | -2.73165 | 1.202335 |
| H | 2.284057 | -4.58459 | 0.188534 |
| N | 4.941173 | -5.3449  | 1.689602 |

|   |          |          |          |
|---|----------|----------|----------|
| H | 4.494878 | -5.43272 | 0.775401 |
| C | 6.007842 | -4.36962 | 1.822577 |
| H | 6.71119  | -4.72445 | 2.579938 |
| C | 5.616934 | -2.93563 | 2.214957 |
| O | 6.498968 | -2.07809 | 2.296655 |
| N | 4.29947  | -2.69926 | 2.413999 |
| C | 3.711188 | -1.3788  | 2.669376 |
| C | 4.401164 | -0.29711 | 1.806851 |
| C | 3.670983 | -0.99436 | 4.157785 |
| O | 4.80185  | 0.762305 | 2.2736   |
| C | 2.682465 | 0.141033 | 4.472788 |
| C | 1.19158  | -0.16326 | 4.270769 |
| O | 0.39644  | 0.805097 | 4.200515 |
| O | 0.850011 | -1.39718 | 4.210476 |
| H | 3.671631 | -3.48603 | 2.310466 |
| H | 2.678265 | -1.45406 | 2.309344 |
| H | 3.404457 | -1.89381 | 4.721668 |
| H | 4.676179 | -0.68897 | 4.46443  |
| H | 2.936217 | 1.031766 | 3.892166 |
| H | 2.79268  | 0.432254 | 5.527782 |
| N | 4.510973 | -0.64211 | 0.489604 |
| H | 3.820181 | -1.30195 | 0.142778 |
| C | 4.820035 | 0.35367  | -0.53117 |
| H | 4.954196 | -0.2247  | -1.45595 |
| C | 3.671728 | 1.340623 | -0.76119 |
| H | 3.477954 | 1.887086 | 0.169228 |
| H | 3.96515  | 2.083909 | -1.5055  |
| C | 2.370547 | 0.657515 | -1.22395 |
| O | 1.533693 | 1.39632  | -1.81498 |
| O | 2.226946 | -0.57817 | -0.96685 |
| C | 6.180079 | 1.025866 | -0.30832 |
| O | 6.446673 | 2.119232 | -0.82022 |
| N | 7.123526 | 0.270089 | 0.319537 |
| H | 6.822805 | -0.53387 | 0.868683 |
| C | 8.468811 | 0.789938 | 0.543149 |
| H | 8.390768 | 1.848845 | 0.815526 |
| C | 9.162789 | 0.02255  | 1.672083 |
| H | 9.203097 | -1.05037 | 1.453667 |
| H | 8.617349 | 0.151904 | 2.611337 |
| H | 10.18245 | 0.398932 | 1.78553  |
| C | 9.341811 | 0.790019 | -0.73398 |
| O | 10.44651 | 1.323216 | -0.73792 |
| N | 8.783718 | 0.179021 | -1.81614 |
| H | 7.877163 | -0.24989 | -1.68442 |
| C | 9.330242 | 0.219167 | -3.15622 |
| H | 10.40286 | 0.415444 | -3.05411 |
| C | 9.13669  | -1.14291 | -3.87325 |

|   |          |          |          |
|---|----------|----------|----------|
| H | 9.771324 | -1.88158 | -3.37035 |
| H | 9.504466 | -1.01568 | -4.895   |
| C | 7.696525 | -1.61806 | -3.87591 |
| C | 7.208947 | -2.43993 | -2.8472  |
| H | 7.894644 | -2.79268 | -2.079   |
| C | 5.860482 | -2.80541 | -2.7906  |
| H | 5.493747 | -3.43081 | -1.98054 |
| C | 4.974032 | -2.36366 | -3.77691 |
| H | 3.924493 | -2.64056 | -3.72482 |
| C | 5.453195 | -1.56699 | -4.82097 |
| H | 4.773411 | -1.22482 | -5.59709 |
| C | 6.798637 | -1.19562 | -4.86899 |
| H | 7.161486 | -0.56066 | -5.67276 |
| C | 8.786553 | 1.378004 | -4.03547 |
| O | 9.120965 | 1.434985 | -5.22245 |
| N | 7.994898 | 2.284182 | -3.41935 |
| H | 7.721222 | 2.144022 | -2.44974 |
| C | 7.504044 | 3.489491 | -4.07597 |
| H | 7.976585 | 3.527144 | -5.05952 |
| C | 5.971429 | 3.555221 | -4.17813 |
| H | 5.556881 | 3.492797 | -3.16309 |
| H | 5.70873  | 4.55273  | -4.56438 |
| C | 5.303363 | 2.48331  | -5.06027 |
| H | 5.562112 | 1.500479 | -4.6432  |
| C | 3.773809 | 2.626466 | -5.00621 |
| H | 3.285302 | 1.860567 | -5.62093 |
| H | 3.383852 | 2.523403 | -3.98673 |
| H | 3.45761  | 3.606801 | -5.38967 |
| C | 5.806901 | 2.523253 | -6.51207 |
| H | 6.877464 | 2.30262  | -6.57706 |
| H | 5.276583 | 1.783906 | -7.12579 |
| H | 5.629692 | 3.510068 | -6.96318 |
| C | -4.66337 | -2.78538 | -6.06582 |
| H | -3.86083 | -3.45713 | -6.38526 |
| C | -4.22927 | -2.00069 | -4.81953 |
| H | -3.36961 | -1.36409 | -5.06601 |
| H | -5.03401 | -1.3288  | -4.50247 |
| C | -3.83889 | -2.86979 | -3.61836 |
| O | -3.89976 | -4.12364 | -3.74049 |
| O | -3.48938 | -2.25312 | -2.5605  |
| C | -5.96352 | -3.55135 | -5.84511 |
| O | -7.0373  | -2.98331 | -5.63709 |
| N | -5.86388 | -4.91441 | -5.91067 |
| H | -4.93426 | -5.29801 | -5.80282 |
| C | -6.99865 | -5.76593 | -5.60556 |
| H | -7.8773  | -5.37353 | -6.12299 |
| C | -7.40203 | -5.90366 | -4.12506 |

|   |          |          |          |
|---|----------|----------|----------|
| O | -8.41143 | -6.53313 | -3.8311  |
| N | -6.5958  | -5.28279 | -3.22074 |
| H | -5.7415  | -4.82281 | -3.53227 |
| C | -6.90208 | -5.28775 | -1.79843 |
| H | -7.381   | -6.24127 | -1.55732 |
| C | -5.6201  | -5.14156 | -0.9566  |
| H | -5.94066 | -5.07355 | 0.086815 |
| H | -5.11135 | -4.20988 | -1.2281  |
| C | -4.68666 | -6.34717 | -1.08074 |
| O | -4.96968 | -7.43701 | -0.60819 |
| N | -3.48581 | -6.09308 | -1.72332 |
| H | -3.50611 | -5.37341 | -2.46095 |
| H | -2.976   | -6.9401  | -1.95501 |
| C | -7.90508 | -4.19612 | -1.35301 |
| O | -8.30751 | -4.18639 | -0.19127 |
| N | -8.27901 | -3.27262 | -2.2748  |
| H | -7.96333 | -3.36312 | -3.23371 |
| C | -9.31785 | -2.30193 | -1.95202 |
| H | -9.11977 | -1.92778 | -0.94277 |
| C | -9.40041 | -1.14992 | -2.96354 |
| H | -9.52855 | -1.56463 | -3.9716  |
| H | -10.33   | -0.60607 | -2.74123 |
| C | -8.23356 | -0.17969 | -2.96617 |
| C | -7.4948  | 0.049154 | -4.13491 |
| H | -7.72737 | -0.5178  | -5.03192 |
| C | -6.4332  | 0.952774 | -4.15835 |
| H | -5.86272 | 1.12262  | -5.06722 |
| C | -6.06993 | 1.642921 | -2.99629 |
| O | -4.97922 | 2.463939 | -3.05573 |
| H | -4.70473 | 2.769517 | -2.14316 |
| C | -6.81087 | 1.443892 | -1.82201 |
| H | -6.54075 | 1.987902 | -0.9206  |
| C | -7.87888 | 0.545187 | -1.81984 |
| H | -8.43942 | 0.40392  | -0.89781 |
| C | 4.577361 | -7.04887 | -2.45185 |
| H | 5.320923 | -6.6368  | -1.76324 |
| C | 3.735053 | -5.93544 | -3.07622 |
| H | 4.379006 | -5.27447 | -3.67235 |
| H | 2.993799 | -6.34007 | -3.7742  |
| C | 2.983007 | -5.03908 | -2.07871 |
| O | 1.976652 | -4.43022 | -2.50791 |
| O | 3.447052 | -4.95998 | -0.88449 |
| C | 0.646894 | -6.54132 | 8.441942 |
| C | 0.656163 | -5.37636 | 7.507636 |
| C | -0.227   | -4.95769 | 6.543699 |
| N | 1.677987 | -4.4395  | 7.474046 |
| C | 1.385635 | -3.52131 | 6.514789 |

|   |          |          |          |
|---|----------|----------|----------|
| N | 0.23784  | -3.80817 | 5.935188 |
| H | 0.64765  | -6.22674 | 9.493857 |
| H | -0.25308 | -7.13986 | 8.276125 |
| H | -1.16615 | -5.39764 | 6.241266 |
| H | 2.015991 | -2.68172 | 6.266735 |
| H | 2.517528 | -4.45477 | 8.035355 |
| C | -1.10978 | 9.402791 | 2.800423 |
| H | -0.31373 | 10.08645 | 3.118116 |
| C | -1.17532 | 8.199712 | 3.770863 |
| H | -0.2373  | 7.631064 | 3.714717 |
| H | -1.23751 | 8.594566 | 4.794436 |
| C | -2.36108 | 7.275335 | 3.48256  |
| H | -3.28952 | 7.865176 | 3.48675  |
| H | -2.25524 | 6.888321 | 2.466265 |
| C | -2.53607 | 6.084107 | 4.434802 |
| H | -1.61052 | 5.518456 | 4.568105 |
| H | -2.85105 | 6.406089 | 5.433676 |
| N | -3.58038 | 5.178249 | 3.918806 |
| H | -4.49242 | 5.62462  | 3.858718 |
| C | -3.32635 | 4.420612 | 2.806316 |
| N | -2.13501 | 3.886697 | 2.600921 |
| H | -1.40817 | 3.819006 | 3.335142 |
| H | -1.9977  | 3.323146 | 1.749224 |
| N | -4.33813 | 4.226326 | 1.942093 |
| H | -5.12197 | 4.878912 | 1.995449 |
| H | -4.1665  | 3.761036 | 1.046306 |
| C | -0.9155  | 9.00085  | 1.336492 |
| O | -1.7844  | 8.378216 | 0.710932 |
| N | 0.258168 | 9.39437  | 0.786116 |
| H | 1.003569 | 9.735529 | 1.384152 |
| C | 0.726125 | 8.95517  | -0.51909 |
| H | 0.025232 | 8.235534 | -0.94367 |
| C | 2.128089 | 8.358905 | -0.32726 |
| O | 2.889327 | 8.849657 | 0.512834 |
| N | 2.417571 | 7.30653  | -1.12161 |
| H | 1.650626 | 6.897076 | -1.65855 |
| C | 3.634327 | 6.517516 | -0.94989 |
| H | 4.345702 | 7.143012 | -0.40487 |
| C | 3.379132 | 5.19461  | -0.20289 |
| H | 2.687118 | 4.581114 | -0.79302 |
| H | 4.319993 | 4.634043 | -0.14385 |
| C | 2.811014 | 5.413631 | 1.203082 |
| H | 3.531034 | 5.94972  | 1.830612 |
| H | 1.900916 | 6.02057  | 1.162007 |
| S | 2.424562 | 3.868733 | 2.115577 |
| C | 1.005805 | 3.233477 | 1.14773  |
| H | 0.586088 | 2.402509 | 1.719394 |



|    |          |          |          |
|----|----------|----------|----------|
| H  | 0.239801 | 4.004771 | 1.031939 |
| H  | 1.302215 | 2.860608 | 0.16562  |
| O  | -2.3548  | -1.86599 | 5.418105 |
| C  | -2.95361 | -2.95849 | 5.20663  |
| O  | -2.42048 | -3.86959 | 4.484832 |
| C  | -4.32012 | -3.23436 | 5.819415 |
| C  | -4.95159 | -2.03733 | 6.529592 |
| H  | -4.97002 | -3.61436 | 5.021184 |
| H  | -4.19204 | -4.07639 | 6.513867 |
| H  | -5.11659 | -1.20796 | 5.833933 |
| H  | -5.91861 | -2.31298 | 6.965832 |
| O  | -1.57747 | -1.91047 | 2.214974 |
| O  | -2.1946  | 0.232737 | 3.598531 |
| Fe | -0.6101  | -2.80094 | 4.129663 |
| C  | -2.50142 | -0.38945 | -0.00734 |
| H  | -1.82747 | 0.135473 | 0.66938  |
| H  | -1.86005 | -0.97397 | -0.66966 |
| C  | -3.25321 | 0.666482 | -0.83136 |
| H  | -4.33592 | 0.53581  | -0.73828 |
| C  | -2.94184 | 2.127051 | -0.3903  |
| O  | -3.79275 | 3.026893 | -0.73777 |
| O  | -1.93312 | 2.327811 | 0.304203 |
| H  | -0.9825  | -3.09623 | -0.68137 |
| N  | -2.9529  | 0.468634 | -2.29011 |
| H  | -1.89119 | 0.419581 | -2.49714 |
| H  | -3.43214 | 1.179606 | -2.86121 |
| H  | -3.2956  | -0.48696 | -2.55185 |
| C  | -3.46615 | -1.2791  | 0.789483 |
| H  | -4.01373 | -0.64044 | 1.493352 |
| C  | -2.77588 | -2.39265 | 1.59674  |
| C  | -2.48884 | -3.67785 | 0.814625 |
| H  | -1.79468 | -4.29634 | 1.384684 |
| H  | -3.42544 | -4.22812 | 0.704443 |
| N  | -1.93904 | -3.54208 | -0.58011 |
| H  | -1.88795 | -4.49047 | -0.97442 |
| H  | -2.58159 | -3.03056 | -1.23909 |
| H  | 1.51442  | -7.19664 | 8.290137 |
| H  | 3.257819 | -7.57301 | 3.469302 |
| H  | 5.105102 | -7.62112 | -3.2245  |
| H  | 3.954497 | -7.75123 | -1.88419 |
| H  | 6.544845 | -4.28606 | 0.872161 |
| H  | 7.856886 | 4.359652 | -3.50565 |
| H  | -4.30159 | -1.66861 | 7.328614 |
| H  | -4.85084 | -2.07689 | -6.88127 |
| H  | -6.80749 | -6.77028 | -5.99543 |
| H  | -10.2931 | -2.80854 | -1.90738 |
| H  | -4.54315 | 9.106184 | -0.9656  |

|   |          |          |          |
|---|----------|----------|----------|
| H | -5.52776 | 9.902581 | 0.267605 |
| H | -2.05445 | 9.958559 | 2.85611  |
| H | 0.798325 | 9.812033 | -1.20362 |
| H | 4.058264 | 6.301046 | -1.93746 |
| H | 0.148442 | 3.074479 | -5.96952 |
| H | 0.266194 | 2.17266  | -4.44635 |
| H | -2.4446  | -0.31105 | 4.375255 |
| H | -1.27213 | 0.525672 | 3.823915 |
| O | -0.42669 | -0.02108 | -2.9026  |
| H | -0.22062 | -0.94435 | -2.64455 |
| H | 0.303049 | 0.525646 | -2.46889 |
| O | 0.026671 | 3.607848 | 4.401375 |
| H | 0.203813 | 2.64166  | 4.464477 |
| H | 0.799222 | 3.945774 | 3.903025 |
| O | 0.393854 | -2.43704 | -1.46374 |
| H | 0.986895 | -3.14264 | -1.84464 |
| H | 1.017141 | -1.69313 | -1.21191 |
| H | -1.80182 | -1.01655 | 2.635769 |
| H | -4.21664 | -1.7307  | 0.125984 |
| H | -3.46555 | -2.72786 | 2.383323 |

<sup>5</sup>TS1<sub>A,C3</sub>

|   |          |          |          |
|---|----------|----------|----------|
| C | -2.05171 | 1.662626 | -5.34794 |
| H | -3.08995 | 1.306121 | -5.3033  |
| C | -1.93689 | 3.085955 | -4.79104 |
| H | -0.91064 | 3.45201  | -4.90833 |
| H | -2.57053 | 3.773115 | -5.36534 |
| C | -2.32651 | 3.160006 | -3.31119 |
| H | -3.32892 | 2.739004 | -3.15707 |
| H | -1.639   | 2.544213 | -2.71533 |
| C | -2.30608 | 4.577241 | -2.74933 |
| O | -1.84712 | 5.531451 | -3.39589 |
| N | -2.82718 | 4.734203 | -1.51013 |
| H | -3.14405 | 3.938744 | -0.96078 |
| H | -2.86021 | 5.671137 | -1.11604 |
| C | -6.83277 | 7.10689  | -1.22541 |
| H | -7.65867 | 6.524374 | -1.65107 |
| C | -6.26063 | 6.443592 | 0.030629 |
| H | -5.87411 | 5.448231 | -0.22772 |
| H | -5.38719 | 7.015068 | 0.366497 |
| C | -7.24653 | 6.302875 | 1.155234 |
| N | -6.90642 | 5.682566 | 2.352396 |
| C | -7.98962 | 5.706704 | 3.105413 |
| H | -8.07729 | 5.297745 | 4.102798 |
| N | -9.01886 | 6.317277 | 2.464261 |
| H | -9.9528  | 6.449417 | 2.823695 |
| C | -8.55991 | 6.701322 | 1.216263 |
| H | -9.19653 | 7.20258  | 0.504469 |
| C | 4.815234 | -5.59394 | 3.286836 |
| C | 5.599028 | -4.40021 | 3.837171 |
| C | 3.971804 | -5.34414 | 2.023416 |
| O | 5.733449 | -4.22033 | 5.043658 |
| C | 3.035967 | -4.17938 | 2.165186 |
| C | 2.47105  | -3.58035 | 3.266502 |
| N | 2.575229 | -3.46674 | 1.076048 |
| C | 1.762836 | -2.49114 | 1.528448 |
| N | 1.672738 | -2.52744 | 2.858131 |
| H | 5.529819 | -6.40391 | 3.087603 |
| H | 4.599298 | -5.19595 | 1.136339 |
| H | 3.407888 | -6.26052 | 1.802269 |
| H | 2.575917 | -3.83546 | 4.308765 |
| H | 1.27577  | -1.77477 | 0.887266 |
| H | 2.77007  | -3.75142 | 0.081525 |
| N | 6.161747 | -3.56834 | 2.904116 |
| H | 5.982858 | -3.73614 | 1.923642 |
| C | 6.963251 | -2.41289 | 3.25891  |
| H | 7.149612 | -2.48008 | 4.3353   |

|   |          |          |          |
|---|----------|----------|----------|
| C | 6.337668 | -1.04252 | 2.94995  |
| O | 7.069551 | -0.08821 | 2.682292 |
| N | 4.987435 | -0.9706  | 3.012619 |
| C | 4.215355 | 0.264174 | 2.816305 |
| C | 4.724472 | 1.048652 | 1.585815 |
| C | 4.152575 | 1.152347 | 4.071259 |
| O | 4.986991 | 2.243632 | 1.631894 |
| C | 2.953356 | 2.111657 | 4.074779 |
| C | 1.553491 | 1.480007 | 4.15966  |
| O | 0.549626 | 2.195928 | 4.101121 |
| O | 1.534604 | 0.187701 | 4.324594 |
| H | 4.470492 | -1.80602 | 3.260664 |
| H | 3.201265 | -0.07502 | 2.58627  |
| H | 4.108481 | 0.494192 | 4.945342 |
| H | 5.077444 | 1.733322 | 4.134416 |
| H | 2.98345  | 2.744857 | 3.181404 |
| H | 3.035104 | 2.802671 | 4.92446  |
| N | 4.853042 | 0.286389 | 0.457172 |
| H | 4.280254 | -0.54919 | 0.406387 |
| C | 5.034945 | 0.892661 | -0.86091 |
| H | 5.137863 | 0.041781 | -1.54666 |
| C | 3.811074 | 1.69787  | -1.31263 |
| H | 3.599676 | 2.491232 | -0.58703 |
| H | 4.025861 | 2.195626 | -2.26235 |
| C | 2.551859 | 0.826311 | -1.48565 |
| O | 1.551877 | 1.400784 | -1.99401 |
| O | 2.621334 | -0.3861  | -1.10267 |
| C | 6.357923 | 1.657668 | -0.99616 |
| O | 6.546655 | 2.424667 | -1.94666 |
| N | 7.352728 | 1.336706 | -0.12249 |
| H | 7.119185 | 0.823506 | 0.724158 |
| C | 8.622656 | 2.058705 | -0.14901 |
| H | 8.414503 | 3.113795 | -0.36019 |
| C | 9.338318 | 1.941363 | 1.200123 |
| H | 9.50876  | 0.892839 | 1.467393 |
| H | 8.734044 | 2.394192 | 1.991475 |
| H | 10.30186 | 2.453089 | 1.137627 |
| C | 9.556744 | 1.622331 | -1.29858 |
| O | 10.58114 | 2.25206  | -1.54166 |
| N | 9.15123  | 0.526425 | -1.99948 |
| H | 8.306143 | 0.064381 | -1.68997 |
| C | 9.784203 | 0.065618 | -3.21783 |
| H | 10.76657 | 0.549563 | -3.25079 |
| C | 9.988487 | -1.47037 | -3.20877 |
| H | 10.77023 | -1.70284 | -2.47705 |
| H | 10.35831 | -1.74326 | -4.20121 |
| C | 8.730525 | -2.24646 | -2.87151 |

|   |          |          |          |
|---|----------|----------|----------|
| C | 8.525453 | -2.74866 | -1.57814 |
| H | 9.303252 | -2.61786 | -0.82834 |
| C | 7.341109 | -3.41083 | -1.24398 |
| H | 7.214158 | -3.80333 | -0.23614 |
| C | 6.329333 | -3.5784  | -2.19151 |
| H | 5.395456 | -4.06799 | -1.92467 |
| C | 6.532008 | -3.09254 | -3.48751 |
| H | 5.757211 | -3.22194 | -4.23885 |
| C | 7.718807 | -2.44022 | -3.82663 |
| H | 7.869219 | -2.0686  | -4.83633 |
| C | 9.061838 | 0.518973 | -4.51536 |
| O | 9.397575 | 0.02408  | -5.59546 |
| N | 8.124015 | 1.483525 | -4.37844 |
| H | 7.864716 | 1.814619 | -3.45218 |
| C | 7.455097 | 2.103242 | -5.51672 |
| H | 7.90243  | 1.6727   | -6.41461 |
| C | 5.928297 | 1.931372 | -5.5017  |
| H | 5.53992  | 2.381987 | -4.57909 |
| H | 5.522286 | 2.524942 | -6.33555 |
| C | 5.403421 | 0.486851 | -5.6123  |
| H | 5.791067 | -0.07582 | -4.75082 |
| C | 3.868687 | 0.474825 | -5.5316  |
| H | 3.479993 | -0.55047 | -5.54722 |
| H | 3.500243 | 0.954046 | -4.61708 |
| H | 3.428134 | 1.008141 | -6.38522 |
| C | 5.886744 | -0.21894 | -6.88957 |
| H | 6.976743 | -0.32102 | -6.9139  |
| H | 5.454992 | -1.22516 | -6.96282 |
| H | 5.575386 | 0.336684 | -7.78556 |
| C | -5.50073 | -3.28919 | -5.28815 |
| H | -4.76073 | -3.88894 | -5.82801 |
| C | -4.84431 | -2.61466 | -4.07279 |
| H | -4.12812 | -1.85777 | -4.41395 |
| H | -5.60468 | -2.0767  | -3.49419 |
| C | -4.10706 | -3.56367 | -3.12149 |
| O | -4.28003 | -4.80459 | -3.2448  |
| O | -3.36232 | -3.01661 | -2.24205 |
| C | -6.72292 | -4.12793 | -4.92862 |
| O | -7.78548 | -3.62288 | -4.56363 |
| N | -6.56911 | -5.48079 | -5.06905 |
| H | -5.61425 | -5.81632 | -5.06963 |
| C | -7.62009 | -6.39664 | -4.6681  |
| H | -8.5725  | -6.01817 | -5.04647 |
| C | -7.82041 | -6.62859 | -3.15933 |
| O | -8.75994 | -7.31463 | -2.7739  |
| N | -6.92307 | -6.02469 | -2.33216 |
| H | -6.12448 | -5.53097 | -2.72734 |

|   |          |          |          |
|---|----------|----------|----------|
| C | -7.00972 | -6.16341 | -0.88531 |
| H | -7.44253 | -7.14486 | -0.66844 |
| C | -5.61383 | -6.08515 | -0.24204 |
| H | -5.76105 | -6.09907 | 0.840745 |
| H | -5.12909 | -5.14045 | -0.51536 |
| C | -4.7478  | -7.28829 | -0.61691 |
| O | -4.96809 | -8.40732 | -0.17182 |
| N | -3.69956 | -7.00781 | -1.45685 |
| H | -3.7457  | -6.18273 | -2.06436 |
| H | -3.21942 | -7.82216 | -1.82138 |
| C | -7.9454  | -5.14336 | -0.19736 |
| O | -8.14435 | -5.22437 | 1.012947 |
| N | -8.50544 | -4.18286 | -0.9767  |
| H | -8.35017 | -4.19665 | -1.9778  |
| C | -9.49592 | -3.27515 | -0.41456 |
| H | -9.14019 | -2.97034 | 0.574509 |
| C | -9.76121 | -2.05599 | -1.30788 |
| H | -10.1029 | -2.39822 | -2.29326 |
| H | -10.6116 | -1.51883 | -0.86321 |
| C | -8.59014 | -1.10888 | -1.48864 |
| C | -8.11883 | -0.7937  | -2.77005 |
| H | -8.56508 | -1.27162 | -3.63712 |
| C | -7.05074 | 0.082307 | -2.95583 |
| H | -6.6856  | 0.318799 | -3.95103 |
| C | -6.41169 | 0.6526   | -1.85076 |
| O | -5.32696 | 1.453231 | -2.08498 |
| H | -4.89458 | 1.740749 | -1.23371 |
| C | -6.87834 | 0.364512 | -0.56059 |
| H | -6.39456 | 0.814942 | 0.30255  |
| C | -7.95858 | -0.50308 | -0.39365 |
| H | -8.30287 | -0.71752 | 0.615815 |
| C | 3.988535 | -7.36511 | -2.02253 |
| H | 4.889026 | -6.74758 | -2.08945 |
| C | 2.779407 | -6.63676 | -2.60823 |
| H | 2.939868 | -6.42512 | -3.67477 |
| H | 1.880724 | -7.26521 | -2.57093 |
| C | 2.431297 | -5.2975  | -1.94026 |
| O | 1.315211 | -4.78601 | -2.25586 |
| O | 3.276393 | -4.78234 | -1.15158 |
| C | 2.291805 | -4.66633 | 8.439018 |
| C | 2.028057 | -3.54282 | 7.491642 |
| C | 1.150071 | -3.40265 | 6.446798 |
| N | 2.722521 | -2.34272 | 7.526348 |
| C | 2.260349 | -1.55015 | 6.525365 |
| N | 1.307528 | -2.16413 | 5.851668 |
| H | 2.127317 | -4.37216 | 9.483862 |
| H | 1.618276 | -5.49928 | 8.21948  |

|   |          |          |          |
|---|----------|----------|----------|
| H | 0.41528  | -4.10022 | 6.074783 |
| H | 2.622083 | -0.55715 | 6.313424 |
| H | 3.476755 | -2.1119  | 8.157072 |
| C | -2.39526 | 9.524374 | 0.993997 |
| H | -1.7015  | 10.37318 | 0.979704 |
| C | -2.10786 | 8.641528 | 2.22981  |
| H | -1.09545 | 8.222233 | 2.156917 |
| H | -2.1094  | 9.293895 | 3.1141   |
| C | -3.12586 | 7.510171 | 2.401825 |
| H | -4.14208 | 7.931087 | 2.383672 |
| H | -3.05933 | 6.851467 | 1.533596 |
| C | -2.97539 | 6.653292 | 3.666018 |
| H | -1.94892 | 6.307353 | 3.811993 |
| H | -3.24723 | 7.213834 | 4.567805 |
| N | -3.87205 | 5.488002 | 3.585538 |
| H | -4.85428 | 5.741657 | 3.495115 |
| C | -3.5594  | 4.418119 | 2.796487 |
| N | -2.30794 | 4.050952 | 2.575284 |
| H | -1.4999  | 4.443311 | 3.089746 |
| H | -2.15096 | 3.158182 | 2.082871 |
| N | -4.57758 | 3.720892 | 2.259286 |
| H | -5.48725 | 4.178781 | 2.23531  |
| H | -4.36066 | 3.037249 | 1.531622 |
| C | -2.34427 | 8.772853 | -0.33732 |
| O | -3.09627 | 7.819081 | -0.57681 |
| N | -1.45381 | 9.256955 | -1.23952 |
| H | -0.71855 | 9.877733 | -0.91926 |
| C | -1.13466 | 8.572917 | -2.48401 |
| H | -1.78723 | 7.707372 | -2.60279 |
| C | 0.350174 | 8.185944 | -2.43979 |
| O | 1.164689 | 8.956141 | -1.92184 |
| N | 0.649578 | 6.987705 | -2.98682 |
| H | -0.12923 | 6.386735 | -3.26216 |
| C | 1.986378 | 6.409096 | -2.88616 |
| H | 2.669794 | 7.238601 | -2.68838 |
| C | 2.106433 | 5.338009 | -1.78341 |
| H | 1.522013 | 4.451027 | -2.05692 |
| H | 3.152858 | 5.012806 | -1.73726 |
| C | 1.669075 | 5.859799 | -0.41067 |
| H | 2.266491 | 6.731795 | -0.12357 |
| H | 0.621952 | 6.178736 | -0.43579 |
| S | 1.862597 | 4.66206  | 0.964944 |
| C | 0.57289  | 3.429284 | 0.547548 |
| H | 0.462402 | 2.776529 | 1.41688  |
| H | -0.38323 | 3.928258 | 0.362453 |
| H | 0.858392 | 2.828323 | -0.31901 |
| O | -1.37117 | -1.01415 | 5.305629 |

|    |          |          |          |
|----|----------|----------|----------|
| C  | -1.76603 | -2.2222  | 5.153572 |
| O  | -1.07593 | -3.01876 | 4.454497 |
| C  | -3.0764  | -2.66278 | 5.774028 |
| C  | -3.30552 | -2.10805 | 7.184688 |
| H  | -3.86521 | -2.29893 | 5.100778 |
| H  | -3.11513 | -3.75647 | 5.756436 |
| H  | -3.26412 | -1.01554 | 7.180432 |
| H  | -4.28514 | -2.41851 | 7.564274 |
| O  | -0.52946 | -0.79411 | 2.556559 |
| O  | -3.342   | 0.127592 | 3.53781  |
| Fe | 0.290886 | -1.28458 | 3.994546 |
| C  | -2.00937 | -1.26685 | 0.60814  |
| H  | -1.37586 | -0.84895 | 1.625742 |
| H  | -1.16648 | -1.38122 | -0.08029 |
| C  | -3.02227 | -0.26363 | 0.055216 |
| H  | -4.02913 | -0.56001 | 0.371707 |
| C  | -2.89215 | 1.229272 | 0.476683 |
| O  | -3.73159 | 2.039733 | -0.05535 |
| O  | -2.05323 | 1.528537 | 1.342186 |
| H  | -0.46617 | -3.24915 | -0.97247 |
| N  | -3.00922 | -0.34996 | -1.45164 |
| H  | -2.03492 | -0.12417 | -1.85331 |
| H  | -3.70249 | 0.295724 | -1.85843 |
| H  | -3.23776 | -1.32177 | -1.77913 |
| C  | -2.65626 | -2.57505 | 1.071011 |
| H  | -3.38901 | -2.89965 | 0.315608 |
| H  | -3.2332  | -2.33325 | 1.972154 |
| C  | -1.67095 | -3.72126 | 1.381002 |
| H  | -2.04318 | -4.30131 | 2.231371 |
| H  | -0.72524 | -3.29736 | 1.723704 |
| C  | -1.41078 | -4.72613 | 0.254333 |
| H  | -0.56024 | -5.3623  | 0.516004 |
| H  | -2.27052 | -5.37618 | 0.072504 |
| N  | -1.08547 | -4.08412 | -1.06184 |
| H  | -0.50809 | -4.70266 | -1.6585  |
| H  | -1.95957 | -3.7874  | -1.5652  |
| H  | 3.320902 | -5.03806 | 8.353024 |
| H  | 4.182944 | -5.93498 | 4.111487 |
| H  | 4.175367 | -8.30569 | -2.55514 |
| H  | 3.832335 | -7.60178 | -0.96378 |
| H  | 7.927804 | -2.43282 | 2.742916 |
| H  | 7.688827 | 3.176822 | -5.51332 |
| H  | -2.54116 | -2.47057 | 7.882013 |
| H  | -5.85689 | -2.50803 | -5.96938 |
| H  | -7.44345 | -7.37102 | -5.13401 |
| H  | -10.4422 | -3.81142 | -0.24996 |
| H  | -6.05153 | 7.196137 | -1.98548 |



|   |          |          |          |
|---|----------|----------|----------|
| H | -7.20406 | 8.116353 | -1.00926 |
| H | -3.40776 | 9.94037  | 1.082018 |
| H | -1.29626 | 9.251246 | -3.33267 |
| H | 2.255602 | 5.969376 | -3.85362 |
| H | -1.73498 | 1.625422 | -6.39723 |
| H | -1.43207 | 0.963689 | -4.77501 |
| H | -2.74394 | -0.089   | 4.275552 |
| H | -2.74158 | 0.595325 | 2.930319 |
| O | -0.61584 | -0.05263 | -2.60314 |
| H | -0.20019 | -0.94297 | -2.52358 |
| H | 0.141842 | 0.55308  | -2.34049 |
| O | 0.061037 | 4.908767 | 3.804947 |
| H | 0.324533 | 3.984421 | 4.035347 |
| H | 0.627736 | 5.12087  | 3.035016 |
| O | 0.782268 | -2.18824 | -1.64541 |
| H | 1.216364 | -3.00571 | -2.00079 |
| H | 1.495054 | -1.50017 | -1.44553 |

<sup>5</sup>IM1<sub>A,C3</sub>

|   |          |          |          |
|---|----------|----------|----------|
| C | -1.88626 | 1.964752 | -4.88818 |
| H | -2.87493 | 1.780951 | -4.44873 |
| C | -1.42104 | 3.394017 | -4.59379 |
| H | -0.49392 | 3.618879 | -5.13208 |
| H | -2.17187 | 4.108186 | -4.95987 |
| C | -1.17381 | 3.644354 | -3.0938  |
| H | -2.04767 | 3.343306 | -2.50216 |
| H | -0.32931 | 3.027276 | -2.75898 |
| C | -0.82286 | 5.102221 | -2.83785 |
| O | 0.070658 | 5.673699 | -3.47864 |
| N | -1.55751 | 5.754386 | -1.90498 |
| H | -2.25125 | 5.27235  | -1.35129 |
| H | -1.38485 | 6.743473 | -1.7236  |
| C | -5.11889 | 8.734729 | -2.17486 |
| H | -6.02062 | 8.339123 | -2.65731 |
| C | -4.72937 | 7.908633 | -0.94545 |
| H | -4.51616 | 6.875435 | -1.25152 |
| H | -3.78466 | 8.293529 | -0.54077 |
| C | -5.77753 | 7.882739 | 0.130958 |
| N | -5.62017 | 7.127663 | 1.287272 |
| C | -6.71157 | 7.314024 | 2.005501 |
| H | -6.92014 | 6.866357 | 2.967681 |
| N | -7.57275 | 8.155153 | 1.378108 |
| H | -8.47827 | 8.445147 | 1.717229 |
| C | -6.99079 | 8.525522 | 0.178294 |
| H | -7.48422 | 9.190239 | -0.51306 |
| C | 2.680773 | -6.09146 | 4.20553  |
| C | 4.017018 | -5.34962 | 4.138263 |
| C | 1.591203 | -5.70655 | 3.18368  |
| O | 4.681883 | -5.17791 | 5.156107 |
| C | 1.296988 | -4.23358 | 3.120265 |
| C | 0.842089 | -3.33298 | 4.053821 |
| N | 1.497604 | -3.49357 | 1.967532 |
| C | 1.167566 | -2.21044 | 2.221719 |
| N | 0.768365 | -2.07866 | 3.48638  |
| H | 2.892901 | -7.16577 | 4.111657 |
| H | 1.874983 | -6.04281 | 2.182655 |
| H | 0.680188 | -6.25918 | 3.44862  |
| H | 0.558615 | -3.50013 | 5.080891 |
| H | 1.234295 | -1.4101  | 1.497992 |
| H | 1.907044 | -3.90596 | 1.0973   |
| N | 4.435247 | -4.90679 | 2.910242 |
| H | 3.90782  | -5.11396 | 2.063956 |
| C | 5.726195 | -4.2568  | 2.766014 |
| H | 6.366454 | -4.58101 | 3.590971 |

|   |          |          |          |
|---|----------|----------|----------|
| C | 5.742048 | -2.71742 | 2.758103 |
| O | 6.783982 | -2.13371 | 2.453242 |
| N | 4.580245 | -2.09907 | 3.073199 |
| C | 4.354423 | -0.64793 | 3.032669 |
| C | 5.028051 | -0.02962 | 1.78784  |
| C | 4.72336  | 0.07848  | 4.33633  |
| O | 5.692868 | 0.998459 | 1.832109 |
| C | 4.085233 | 1.471927 | 4.464041 |
| C | 2.555678 | 1.55211  | 4.598332 |
| O | 2.013624 | 2.657584 | 4.587757 |
| O | 1.933619 | 0.414199 | 4.763556 |
| H | 3.800582 | -2.68802 | 3.333932 |
| H | 3.275224 | -0.53509 | 2.888001 |
| H | 4.403117 | -0.55672 | 5.169664 |
| H | 5.812606 | 0.176418 | 4.388553 |
| H | 4.370985 | 2.095444 | 3.611654 |
| H | 4.494815 | 1.978588 | 5.348667 |
| N | 4.799276 | -0.73691 | 0.641082 |
| H | 3.978461 | -1.33238 | 0.626419 |
| C | 5.06244  | -0.1774  | -0.67903 |
| H | 4.922086 | -1.01875 | -1.37197 |
| C | 4.05411  | 0.908581 | -1.06649 |
| H | 4.052012 | 1.694763 | -0.30165 |
| H | 4.351136 | 1.381093 | -2.0053  |
| C | 2.628701 | 0.34616  | -1.21715 |
| O | 1.815082 | 1.027902 | -1.8953  |
| O | 2.380807 | -0.76331 | -0.63792 |
| C | 6.531125 | 0.217511 | -0.8708  |
| O | 6.869241 | 1.042549 | -1.72557 |
| N | 7.438349 | -0.53229 | -0.18381 |
| H | 7.118344 | -1.07182 | 0.618966 |
| C | 8.868095 | -0.26495 | -0.30017 |
| H | 9.017267 | 0.82049  | -0.33578 |
| C | 9.621586 | -0.84343 | 0.901304 |
| H | 9.447332 | -1.92124 | 0.994317 |
| H | 9.283242 | -0.36827 | 1.826698 |
| H | 10.69222 | -0.66859 | 0.770219 |
| C | 9.481478 | -0.77587 | -1.62317 |
| O | 10.64031 | -0.50339 | -1.91925 |
| N | 8.649093 | -1.51662 | -2.40883 |
| H | 7.720229 | -1.70372 | -2.05508 |
| C | 8.971631 | -1.9369  | -3.75667 |
| H | 10.06208 | -1.88226 | -3.84277 |
| C | 8.528211 | -3.4     | -4.01275 |
| H | 9.117035 | -4.04786 | -3.35317 |
| H | 8.795552 | -3.63366 | -5.04675 |
| C | 7.04774  | -3.6383  | -3.78599 |

|   |          |          |          |
|---|----------|----------|----------|
| C | 6.559795 | -4.01849 | -2.52549 |
| H | 7.263146 | -4.19414 | -1.71349 |
| C | 5.189018 | -4.17721 | -2.29826 |
| H | 4.821707 | -4.46026 | -1.31523 |
| C | 4.280902 | -3.97154 | -3.34007 |
| H | 3.215332 | -4.09245 | -3.16365 |
| C | 4.755019 | -3.61081 | -4.60428 |
| H | 4.056081 | -3.45274 | -5.42177 |
| C | 6.123228 | -3.44162 | -4.82423 |
| H | 6.486879 | -3.14126 | -5.80291 |
| C | 8.423857 | -1.0008  | -4.86651 |
| O | 8.551862 | -1.33499 | -6.04802 |
| N | 7.860962 | 0.158006 | -4.45615 |
| H | 7.763812 | 0.351708 | -3.46222 |
| C | 7.402505 | 1.190605 | -5.37774 |
| H | 7.69047  | 0.868479 | -6.3803  |
| C | 5.894964 | 1.477812 | -5.28312 |
| H | 5.667609 | 1.778099 | -4.25159 |
| H | 5.686693 | 2.354214 | -5.91681 |
| C | 4.953848 | 0.328693 | -5.69269 |
| H | 5.159063 | -0.52434 | -5.03141 |
| C | 3.487611 | 0.742174 | -5.48589 |
| H | 2.807834 | -0.07491 | -5.7571  |
| H | 3.272296 | 1.01313  | -4.44561 |
| H | 3.232015 | 1.605226 | -6.11651 |
| C | 5.191676 | -0.13379 | -7.13947 |
| H | 6.197359 | -0.54491 | -7.27581 |
| H | 4.471716 | -0.91345 | -7.41912 |
| H | 5.061812 | 0.699693 | -7.84457 |
| C | -5.39774 | -3.63787 | -5.26381 |
| H | -4.67826 | -4.38374 | -5.61776 |
| C | -4.79186 | -2.82922 | -4.10571 |
| H | -3.96512 | -2.21463 | -4.48057 |
| H | -5.54021 | -2.12931 | -3.71491 |
| C | -4.26476 | -3.6625  | -2.9317  |
| O | -4.59034 | -4.8773  | -2.85319 |
| O | -3.53187 | -3.04763 | -2.0901  |
| C | -6.73025 | -4.29218 | -4.91521 |
| O | -7.76057 | -3.63881 | -4.7408  |
| N | -6.71156 | -5.65832 | -4.84042 |
| H | -5.80303 | -6.07655 | -4.68667 |
| C | -7.88781 | -6.40028 | -4.427   |
| H | -8.74973 | -6.02959 | -4.98691 |
| C | -8.28351 | -6.32764 | -2.94099 |
| O | -9.33637 | -6.8349  | -2.5719  |
| N | -7.42014 | -5.67057 | -2.11902 |
| H | -6.53169 | -5.32907 | -2.48308 |

|   |          |          |          |
|---|----------|----------|----------|
| C | -7.70761 | -5.48915 | -0.70414 |
| H | -8.27996 | -6.35822 | -0.36513 |
| C | -6.40704 | -5.40428 | 0.114527 |
| H | -6.69318 | -5.18265 | 1.145505 |
| H | -5.78275 | -4.58401 | -0.25944 |
| C | -5.64857 | -6.73159 | 0.106465 |
| O | -6.04193 | -7.70569 | 0.734838 |
| N | -4.491   | -6.73362 | -0.63179 |
| H | -4.37152 | -6.04953 | -1.3873  |
| H | -4.07923 | -7.64921 | -0.76899 |
| C | -8.59826 | -4.26592 | -0.38339 |
| O | -8.94977 | -4.06258 | 0.777087 |
| N | -8.95128 | -3.46345 | -1.42022 |
| H | -8.66768 | -3.70796 | -2.3624  |
| C | -9.91722 | -2.3917  | -1.22469 |
| H | -9.72757 | -1.95966 | -0.23796 |
| C | -9.85381 | -1.32344 | -2.32458 |
| H | -10.0307 | -1.79745 | -3.29839 |
| H | -10.7058 | -0.64768 | -2.15844 |
| C | -8.5665  | -0.52365 | -2.3888  |
| C | -7.84814 | -0.42391 | -3.58803 |
| H | -8.19513 | -0.96688 | -4.46248 |
| C | -6.66942 | 0.315797 | -3.67102 |
| H | -6.11398 | 0.384443 | -4.60191 |
| C | -6.1687  | 0.962923 | -2.5373  |
| O | -4.97658 | 1.626495 | -2.65138 |
| H | -4.66125 | 1.934871 | -1.75912 |
| C | -6.88048 | 0.890832 | -1.33172 |
| H | -6.50036 | 1.403488 | -0.45183 |
| C | -8.0665  | 0.158127 | -1.27113 |
| H | -8.602   | 0.111533 | -0.32539 |
| C | 3.401165 | -7.82741 | -0.31177 |
| H | 4.280929 | -7.27404 | 0.028772 |
| C | 2.571425 | -6.98702 | -1.2831  |
| H | 3.163431 | -6.76654 | -2.18282 |
| H | 1.688403 | -7.53332 | -1.63314 |
| C | 2.097043 | -5.63143 | -0.74147 |
| O | 1.097523 | -5.10761 | -1.31114 |
| O | 2.753915 | -5.10144 | 0.212448 |
| C | -0.37345 | -3.32498 | 9.426318 |
| C | 0.086343 | -2.43637 | 8.317672 |
| C | -0.47997 | -2.08816 | 7.117228 |
| N | 1.29433  | -1.75456 | 8.341591 |
| C | 1.409122 | -1.04477 | 7.188085 |
| N | 0.349373 | -1.22477 | 6.425132 |
| H | -0.48637 | -2.77885 | 10.37207 |
| H | -1.3468  | -3.7551  | 9.174848 |

|   |          |          |          |
|---|----------|----------|----------|
| H | -1.42413 | -2.40018 | 6.696937 |
| H | 2.255064 | -0.42785 | 6.930005 |
| H | 1.98291  | -1.78973 | 9.079583 |
| C | -0.18844 | 9.91362  | 0.597548 |
| H | 0.676941 | 10.56945 | 0.750218 |
| C | -0.27734 | 8.893714 | 1.75957  |
| H | 0.651549 | 8.310953 | 1.813438 |
| H | -0.33968 | 9.462943 | 2.697294 |
| C | -1.47795 | 7.951009 | 1.632339 |
| H | -2.37814 | 8.543833 | 1.417801 |
| H | -1.33316 | 7.301673 | 0.764834 |
| C | -1.7656  | 7.061549 | 2.849223 |
| H | -0.90018 | 6.465966 | 3.149419 |
| H | -2.04875 | 7.663531 | 3.720766 |
| N | -2.89542 | 6.172494 | 2.545866 |
| H | -3.76113 | 6.659952 | 2.313852 |
| C | -2.76837 | 5.007575 | 1.865092 |
| N | -1.64522 | 4.291358 | 1.874266 |
| H | -0.88703 | 4.467574 | 2.558705 |
| H | -1.73251 | 3.324898 | 1.554762 |
| N | -3.81091 | 4.605307 | 1.119235 |
| H | -4.63937 | 5.1911   | 1.103989 |
| H | -3.82004 | 3.681298 | 0.669531 |
| C | -0.13136 | 9.252997 | -0.77831 |
| O | -1.12301 | 8.687221 | -1.26203 |
| N | 1.059494 | 9.32882  | -1.41517 |
| H | 1.878397 | 9.668366 | -0.92143 |
| C | 1.382021 | 8.581934 | -2.62239 |
| H | 0.564606 | 7.904155 | -2.86946 |
| C | 2.699939 | 7.842078 | -2.35649 |
| O | 3.589247 | 8.405663 | -1.71087 |
| N | 2.775971 | 6.593554 | -2.86411 |
| H | 1.918219 | 6.177903 | -3.23004 |
| C | 3.906392 | 5.71476  | -2.57425 |
| H | 4.733747 | 6.36027  | -2.26975 |
| C | 3.601598 | 4.672681 | -1.48087 |
| H | 2.849118 | 3.96366  | -1.84732 |
| H | 4.514096 | 4.091158 | -1.30337 |
| C | 3.131999 | 5.31118  | -0.16929 |
| H | 3.891964 | 5.999838 | 0.21551  |
| H | 2.21975  | 5.89551  | -0.33149 |
| S | 2.818731 | 4.126063 | 1.198036 |
| C | 1.33615  | 3.251577 | 0.573828 |
| H | 1.020989 | 2.563246 | 1.364327 |
| H | 0.529875 | 3.964298 | 0.373691 |
| H | 1.555858 | 2.672167 | -0.32459 |
| O | -1.43781 | 0.898296 | 5.312549 |

|    |          |          |          |
|----|----------|----------|----------|
| C  | -2.26862 | -0.0709  | 5.203892 |
| O  | -1.91478 | -1.11927 | 4.587137 |
| C  | -3.65138 | 0.052717 | 5.809303 |
| C  | -3.62259 | 0.560278 | 7.257908 |
| H  | -4.19238 | 0.773316 | 5.183273 |
| H  | -4.14995 | -0.91856 | 5.731733 |
| H  | -3.13495 | 1.537604 | 7.310485 |
| H  | -4.64115 | 0.6593   | 7.649368 |
| O  | -0.08632 | 0.565323 | 2.680717 |
| O  | -3.38812 | 2.626105 | 3.903241 |
| Fe | 0.12112  | -0.19571 | 4.321196 |
| C  | -2.53565 | -1.25131 | 0.633848 |
| H  | -1.49029 | -1.03612 | 0.8359   |
| C  | -3.30882 | -0.24702 | -0.15095 |
| H  | -4.38189 | -0.46538 | -0.08737 |
| C  | -3.14319 | 1.231466 | 0.330398 |
| O  | -3.76614 | 2.118335 | -0.33024 |
| O  | -2.46208 | 1.454056 | 1.360333 |
| H  | -0.84483 | -3.26697 | -0.44526 |
| N  | -2.9743  | -0.34464 | -1.62522 |
| H  | -1.93031 | -0.19605 | -1.85123 |
| H  | -3.53108 | 0.330967 | -2.17087 |
| H  | -3.21381 | -1.31456 | -1.9471  |
| C  | -3.22125 | -2.3368  | 1.403897 |
| H  | -3.65083 | -1.89554 | 2.32098  |
| C  | -2.2897  | -3.47727 | 1.859154 |
| C  | -1.98651 | -4.57983 | 0.839991 |
| H  | -1.1985  | -5.22837 | 1.233035 |
| H  | -2.86506 | -5.19972 | 0.639535 |
| N  | -1.51076 | -4.07838 | -0.49092 |
| H  | -0.93998 | -4.79178 | -0.96933 |
| H  | -2.31401 | -3.78849 | -1.10655 |
| H  | 0.321634 | -4.15613 | 9.603253 |
| H  | 2.321448 | -5.93825 | 5.227451 |
| H  | 3.74097  | -8.75441 | -0.78847 |
| H  | 2.819277 | -8.10417 | 0.576084 |
| H  | 6.19416  | -4.56999 | 1.82821  |
| H  | 7.95155  | 2.116248 | -5.15738 |
| H  | -3.0717  | -0.1262  | 7.911825 |
| H  | -5.60196 | -2.95407 | -6.09567 |
| H  | -7.75397 | -7.45444 | -4.68823 |
| H  | -10.9355 | -2.80734 | -1.19057 |
| H  | -4.30717 | 8.72091  | -2.90782 |
| H  | -5.30732 | 9.781613 | -1.90747 |
| H  | -1.08516 | 10.54485 | 0.607902 |
| H  | 1.529793 | 9.270068 | -3.46622 |
| H  | 4.197951 | 5.199847 | -3.49696 |

|   |          |          |          |
|---|----------|----------|----------|
| H | -1.96895 | 1.800066 | -5.96959 |
| H | -1.19294 | 1.22069  | -4.48014 |
| H | -2.60913 | 2.386014 | 4.43795  |
| H | -3.19938 | 2.199927 | 3.047524 |
| O | -0.47651 | -0.24918 | -2.52538 |
| H | -0.17233 | -1.16686 | -2.34121 |
| H | 0.313454 | 0.303106 | -2.24961 |
| O | 0.563977 | 4.760916 | 3.545764 |
| H | 0.846661 | 3.974916 | 4.063865 |
| H | 1.313219 | 4.87043  | 2.924011 |
| O | 0.473257 | -2.44304 | -1.20151 |
| H | 0.930982 | -3.30376 | -1.36497 |
| H | 1.181045 | -1.76784 | -0.95513 |
| H | -0.95746 | 0.742534 | 2.270139 |
| H | -4.07379 | -2.73186 | 0.831345 |
| H | -1.35826 | -3.04001 | 2.228058 |
| H | -2.74281 | -3.983   | 2.720024 |



<sup>5</sup>TS2<sub>A,C3</sub>

|   |          |          |          |
|---|----------|----------|----------|
| C | 0.120011 | 2.519814 | -5.16298 |
| H | -0.72463 | 2.671304 | -5.84938 |
| C | 0.224922 | 3.671753 | -4.15796 |
| H | 1.0882   | 3.49811  | -3.503   |
| H | 0.397033 | 4.618528 | -4.68165 |
| C | -1.03499 | 3.82098  | -3.29519 |
| H | -1.93112 | 3.775041 | -3.933   |
| H | -1.12223 | 2.992539 | -2.58487 |
| C | -1.11152 | 5.152645 | -2.55457 |
| O | -0.64309 | 6.192314 | -3.05149 |
| N | -1.75589 | 5.147757 | -1.36979 |
| H | -2.09767 | 4.28298  | -0.95049 |
| H | -1.91105 | 6.035233 | -0.89439 |
| C | -5.83865 | 5.565504 | -0.71982 |
| H | -6.50128 | 4.72223  | -0.94698 |
| C | -5.32844 | 5.506033 | 0.724484 |
| H | -4.72696 | 4.599011 | 0.865013 |
| H | -4.6417  | 6.346133 | 0.894175 |
| C | -6.42009 | 5.525533 | 1.758827 |
| N | -6.17773 | 5.236758 | 3.099347 |
| C | -7.33895 | 5.341795 | 3.716961 |
| H | -7.51358 | 5.176292 | 4.771506 |
| N | -8.3275  | 5.687088 | 2.852228 |
| H | -9.30327 | 5.813099 | 3.077659 |
| C | -7.75612 | 5.804171 | 1.597518 |
| H | -8.33929 | 6.061858 | 0.727624 |
| C | 3.227083 | -6.73187 | 3.219693 |
| C | 4.371704 | -5.75225 | 3.489914 |
| C | 2.197182 | -6.37006 | 2.12841  |
| O | 4.855156 | -5.66628 | 4.61589  |
| C | 1.590642 | -5.0043  | 2.285286 |
| C | 0.796985 | -4.43365 | 3.254696 |
| N | 1.833349 | -3.99292 | 1.373671 |
| C | 1.205848 | -2.87866 | 1.804264 |
| N | 0.566045 | -3.11127 | 2.947209 |
| H | 3.679147 | -7.70329 | 2.973555 |
| H | 2.658268 | -6.42926 | 1.138272 |
| H | 1.410628 | -7.1354  | 2.150805 |
| H | 0.378863 | -4.87926 | 4.144934 |
| H | 1.227895 | -1.93893 | 1.271129 |
| H | 2.453587 | -4.11641 | 0.536221 |
| N | 4.839745 | -5.01085 | 2.436131 |
| H | 4.472145 | -5.13169 | 1.492357 |
| C | 5.99155  | -4.14185 | 2.605468 |
| H | 6.541567 | -4.47787 | 3.488772 |

|   |          |          |          |
|---|----------|----------|----------|
| C | 5.718634 | -2.6372  | 2.77959  |
| O | 6.659717 | -1.84498 | 2.703859 |
| N | 4.430631 | -2.28082 | 2.993184 |
| C | 3.922942 | -0.90424 | 3.052074 |
| C | 4.637296 | -0.00971 | 2.018111 |
| C | 3.906307 | -0.28937 | 4.460453 |
| O | 5.079465 | 1.099518 | 2.291664 |
| C | 2.956653 | 0.917742 | 4.57429  |
| C | 1.472073 | 0.647324 | 4.258513 |
| O | 0.743902 | 1.594087 | 3.896809 |
| O | 1.076464 | -0.56377 | 4.420694 |
| H | 3.751981 | -3.02928 | 3.04197  |
| H | 2.881839 | -0.98127 | 2.722287 |
| H | 3.595832 | -1.07519 | 5.156951 |
| H | 4.92172  | 0.01972  | 4.728921 |
| H | 3.304215 | 1.729381 | 3.93101  |
| H | 2.993543 | 1.304418 | 5.603353 |
| N | 4.707214 | -0.56804 | 0.771185 |
| H | 4.008704 | -1.27201 | 0.558809 |
| C | 5.019561 | 0.239042 | -0.40278 |
| H | 5.096746 | -0.48011 | -1.23    |
| C | 3.903513 | 1.233112 | -0.74466 |
| H | 3.731257 | 1.890593 | 0.115758 |
| H | 4.215047 | 1.87723  | -1.56925 |
| C | 2.585138 | 0.539472 | -1.13042 |
| O | 1.810059 | 1.198526 | -1.8757  |
| O | 2.365672 | -0.63249 | -0.67544 |
| C | 6.414863 | 0.874814 | -0.32358 |
| O | 6.712002 | 1.85413  | -1.01445 |
| N | 7.339151 | 0.196822 | 0.413424 |
| H | 7.012882 | -0.50214 | 1.079033 |
| C | 8.682372 | 0.737856 | 0.605265 |
| H | 8.603074 | 1.825172 | 0.721908 |
| C | 9.327663 | 0.138359 | 1.858288 |
| H | 9.369005 | -0.95474 | 1.796136 |
| H | 8.747196 | 0.401234 | 2.747236 |
| H | 10.34462 | 0.525924 | 1.955656 |
| C | 9.604672 | 0.554088 | -0.62027 |
| O | 10.72167 | 1.061107 | -0.64273 |
| N | 9.0805   | -0.18028 | -1.64112 |
| H | 8.155235 | -0.56572 | -1.5061  |
| C | 9.69933  | -0.32157 | -2.9424  |
| H | 10.76092 | -0.08874 | -2.80786 |
| C | 9.570261 | -1.77503 | -3.46841 |
| H | 10.16035 | -2.42333 | -2.81042 |
| H | 10.02428 | -1.79264 | -4.46267 |
| C | 8.137093 | -2.26491 | -3.53057 |

|   |          |          |          |
|---|----------|----------|----------|
| C | 7.535785 | -2.87829 | -2.41989 |
| H | 8.129576 | -3.06155 | -1.52638 |
| C | 6.188382 | -3.25045 | -2.44078 |
| H | 5.731863 | -3.70761 | -1.56678 |
| C | 5.421092 | -3.03328 | -3.5888  |
| H | 4.373191 | -3.32104 | -3.60196 |
| C | 6.015664 | -2.44881 | -4.71045 |
| H | 5.429429 | -2.28216 | -5.61069 |
| C | 7.35768  | -2.06411 | -4.68073 |
| H | 7.809131 | -1.58644 | -5.5459  |
| C | 9.185277 | 0.686206 | -4.00444 |
| O | 9.567625 | 0.572769 | -5.17288 |
| N | 8.359708 | 1.660969 | -3.56105 |
| H | 8.050627 | 1.663794 | -2.59179 |
| C | 7.868244 | 2.735636 | -4.41449 |
| H | 8.36052  | 2.617973 | -5.38184 |
| C | 6.337114 | 2.755825 | -4.55083 |
| H | 5.904629 | 2.865093 | -3.54749 |
| H | 6.065723 | 3.664839 | -5.11007 |
| C | 5.703515 | 1.532123 | -5.23936 |
| H | 5.97301  | 0.643121 | -4.65303 |
| C | 4.171236 | 1.651948 | -5.2326  |
| H | 3.705815 | 0.773754 | -5.69676 |
| H | 3.767099 | 1.738945 | -4.21711 |
| H | 3.845081 | 2.535817 | -5.79866 |
| C | 6.230456 | 1.326734 | -6.66861 |
| H | 7.305812 | 1.120523 | -6.67943 |
| H | 5.724244 | 0.480436 | -7.15049 |
| H | 6.043729 | 2.215722 | -7.28789 |
| C | -5.1908  | -2.32913 | -6.00148 |
| H | -4.52515 | -3.03654 | -6.50634 |
| C | -4.5274  | -1.79987 | -4.72127 |
| H | -3.66675 | -1.17215 | -4.98137 |
| H | -5.22939 | -1.14998 | -4.18557 |
| C | -4.0423  | -2.8811  | -3.75155 |
| O | -4.36951 | -4.07739 | -3.95322 |
| O | -3.32552 | -2.47646 | -2.77122 |
| C | -6.55842 | -2.95118 | -5.74312 |
| O | -7.52397 | -2.28488 | -5.36666 |
| N | -6.65108 | -4.29554 | -5.97611 |
| H | -5.77889 | -4.80686 | -6.00194 |
| C | -7.87163 | -5.02256 | -5.67889 |
| H | -8.71759 | -4.47856 | -6.10568 |
| C | -8.21362 | -5.24572 | -4.19418 |
| O | -9.29344 | -5.73797 | -3.89062 |
| N | -7.26875 | -4.85664 | -3.29438 |
| H | -6.37151 | -4.50802 | -3.62413 |

|   |          |          |          |
|---|----------|----------|----------|
| C | -7.48337 | -4.98173 | -1.86061 |
| H | -8.12103 | -5.8552  | -1.6942  |
| C | -6.14899 | -5.19481 | -1.12344 |
| H | -6.3736  | -5.20848 | -0.05406 |
| H | -5.47511 | -4.35416 | -1.32759 |
| C | -5.50409 | -6.53012 | -1.49319 |
| O | -5.96403 | -7.59886 | -1.11661 |
| N | -4.35983 | -6.43164 | -2.25043 |
| H | -4.21651 | -5.59716 | -2.828   |
| H | -4.03434 | -7.3132  | -2.63018 |
| C | -8.23457 | -3.79504 | -1.21401 |
| O | -8.52106 | -3.84354 | -0.01956 |
| N | -8.53729 | -2.7343  | -2.00604 |
| H | -8.33443 | -2.77162 | -2.99883 |
| C | -9.37605 | -1.66106 | -1.48667 |
| H | -9.03538 | -1.43875 | -0.47086 |
| C | -9.35633 | -0.40334 | -2.36559 |
| H | -9.66338 | -0.67041 | -3.38487 |
| H | -10.1428 | 0.260967 | -1.97856 |
| C | -8.03723 | 0.344426 | -2.42268 |
| C | -7.42471 | 0.616476 | -3.65368 |
| H | -7.87761 | 0.244205 | -4.56787 |
| C | -6.21965 | 1.312671 | -3.72806 |
| H | -5.74629 | 1.515839 | -4.6843  |
| C | -5.58515 | 1.743175 | -2.55827 |
| O | -4.37004 | 2.357279 | -2.68561 |
| H | -3.96652 | 2.546672 | -1.79745 |
| C | -6.1921  | 1.502313 | -1.31679 |
| H | -5.71324 | 1.851674 | -0.40524 |
| C | -7.40596 | 0.814166 | -1.26281 |
| H | -7.85881 | 0.633886 | -0.29017 |
| C | 4.734966 | -7.33239 | -1.27656 |
| H | 5.429683 | -6.79156 | -0.62735 |
| C | 4.02655  | -6.3756  | -2.23687 |
| H | 4.765044 | -5.90658 | -2.90167 |
| H | 3.33002  | -6.91044 | -2.89196 |
| C | 3.249341 | -5.22837 | -1.57193 |
| O | 2.311302 | -4.72168 | -2.24006 |
| O | 3.622878 | -4.85053 | -0.40956 |
| C | -0.16029 | -5.27738 | 8.685546 |
| C | 0.017548 | -4.17117 | 7.69826  |
| C | -0.68485 | -3.81351 | 6.574987 |
| N | 1.039625 | -3.23629 | 7.78166  |
| C | 0.922181 | -2.3786  | 6.73335  |
| N | -0.11399 | -2.70148 | 5.985881 |
| H | -0.32994 | -4.89998 | 9.702698 |
| H | -1.02827 | -5.88223 | 8.408669 |

|   |          |          |          |
|---|----------|----------|----------|
| H | -1.55793 | -4.27795 | 6.140842 |
| H | 1.590292 | -1.55583 | 6.532666 |
| H | 1.769901 | -3.2147  | 8.47886  |
| C | -1.96642 | 9.360278 | 1.89416  |
| H | -1.40731 | 10.28973 | 2.055224 |
| C | -1.62313 | 8.349716 | 3.01003  |
| H | -0.5658  | 8.061811 | 2.934381 |
| H | -1.73171 | 8.868942 | 3.972834 |
| C | -2.50925 | 7.099039 | 2.996687 |
| H | -3.56465 | 7.405909 | 2.967142 |
| H | -2.33088 | 6.533079 | 2.079121 |
| C | -2.30395 | 6.176908 | 4.204172 |
| H | -1.26755 | 5.839827 | 4.288558 |
| H | -2.53281 | 6.704672 | 5.138299 |
| N | -3.18692 | 5.00716  | 4.144328 |
| H | -4.18307 | 5.223252 | 4.136049 |
| C | -2.89805 | 3.886698 | 3.429725 |
| N | -1.6553  | 3.554405 | 3.116964 |
| H | -0.81769 | 3.967729 | 3.558687 |
| H | -1.50228 | 2.786809 | 2.45927  |
| N | -3.92127 | 3.104664 | 3.045131 |
| H | -4.85947 | 3.46239  | 3.182111 |
| H | -3.78115 | 2.092263 | 2.881471 |
| C | -1.71655 | 8.825251 | 0.485684 |
| O | -2.33509 | 7.849252 | 0.045579 |
| N | -0.80369 | 9.523186 | -0.23955 |
| H | -0.16963 | 10.14171 | 0.253753 |
| C | -0.28323 | 9.063461 | -1.51764 |
| H | -0.86521 | 8.209946 | -1.86629 |
| C | 1.20418  | 8.723814 | -1.33886 |
| O | 1.905762 | 9.418484 | -0.59753 |
| N | 1.629969 | 7.652431 | -2.04119 |
| H | 0.921931 | 7.08767  | -2.51707 |
| C | 2.979012 | 7.115567 | -1.90601 |
| H | 3.592953 | 7.907129 | -1.46818 |
| C | 3.036654 | 5.841553 | -1.0421  |
| H | 2.43258  | 5.056697 | -1.51463 |
| H | 4.070272 | 5.474702 | -1.0294  |
| C | 2.557331 | 6.07355  | 0.394014 |
| H | 3.174794 | 6.833646 | 0.885017 |
| H | 1.525121 | 6.438725 | 0.405071 |
| S | 2.658606 | 4.593042 | 1.474329 |
| C | 1.299752 | 3.561477 | 0.80824  |
| H | 1.143493 | 2.753924 | 1.527234 |
| H | 0.375685 | 4.141367 | 0.730874 |
| H | 1.546214 | 3.126568 | -0.16295 |
| O | -2.53422 | -1.17651 | 4.928643 |

|    |          |          |          |
|----|----------|----------|----------|
| C  | -3.1076  | -2.29182 | 4.644686 |
| O  | -2.49037 | -3.20501 | 4.041812 |
| C  | -4.57253 | -2.46523 | 5.025554 |
| C  | -4.90065 | -1.97386 | 6.440431 |
| H  | -5.15677 | -1.89195 | 4.291396 |
| H  | -4.83936 | -3.51835 | 4.894418 |
| H  | -4.62413 | -0.92221 | 6.557896 |
| H  | -5.9709  | -2.08058 | 6.651108 |
| O  | -1.20259 | -0.72911 | 2.288929 |
| O  | -3.66623 | 0.310348 | 2.867922 |
| Fe | -0.62986 | -1.66137 | 4.0541   |
| C  | -2.04828 | -1.11997 | 0.106743 |
| H  | -1.01389 | -1.2647  | -0.19395 |
| C  | -2.72277 | 0.115418 | -0.40989 |
| H  | -3.79218 | 0.069715 | -0.18153 |
| C  | -2.23514 | 1.547596 | 0.075051 |
| O  | -2.83213 | 2.489999 | -0.52234 |
| O  | -1.38039 | 1.62684  | 0.968422 |
| H  | -0.52006 | -3.40132 | -1.40318 |
| N  | -2.58397 | 0.066412 | -1.91155 |
| H  | -1.53652 | 0.024834 | -2.2426  |
| H  | -3.04336 | 0.894376 | -2.32401 |
| H  | -3.02008 | -0.80112 | -2.30778 |
| C  | -2.89158 | -2.2845  | 0.485694 |
| H  | -3.52713 | -1.96034 | 1.321122 |
| C  | -2.12653 | -3.56656 | 0.853077 |
| C  | -1.93778 | -4.59757 | -0.26016 |
| H  | -1.23482 | -5.36531 | 0.074014 |
| H  | -2.87261 | -5.09154 | -0.53732 |
| N  | -1.38409 | -4.0136  | -1.53252 |
| H  | -1.09201 | -4.7626  | -2.16627 |
| H  | -2.12859 | -3.45941 | -2.03918 |
| H  | 0.711673 | -5.94371 | 8.719683 |
| H  | 2.730138 | -6.85982 | 4.185809 |
| H  | 5.301687 | -8.09199 | -1.82826 |
| H  | 4.018461 | -7.85644 | -0.63179 |
| H  | 6.653201 | -4.22841 | 1.738381 |
| H  | 8.197747 | 3.693578 | -3.98935 |
| H  | -4.34941 | -2.54756 | 7.194797 |
| H  | -5.35822 | -1.48635 | -6.68189 |
| H  | -7.8299  | -6.00159 | -6.16563 |
| H  | -10.4134 | -2.01477 | -1.39282 |
| H  | -4.99536 | 5.528477 | -1.41594 |
| H  | -6.38806 | 6.494786 | -0.91513 |
| H  | -3.03317 | 9.612039 | 1.955138 |
| H  | -0.37043 | 9.86754  | -2.26066 |
| H  | 3.372068 | 6.894206 | -2.90568 |

|   |          |          |          |
|---|----------|----------|----------|
| H | 1.031832 | 2.448161 | -5.76736 |
| H | -0.0172  | 1.557233 | -4.65835 |
| H | -3.58711 | 0.051601 | 3.808402 |
| H | -2.77438 | 0.001384 | 2.558949 |
| O | -0.16329 | -0.20284 | -2.85229 |
| H | 0.172606 | -1.12033 | -2.74517 |
| H | 0.578309 | 0.373829 | -2.45879 |
| O | 0.777716 | 4.314631 | 4.266342 |
| H | 0.93056  | 3.336263 | 4.260672 |
| H | 1.378294 | 4.645746 | 3.568436 |
| O | 0.851554 | -2.53999 | -1.70421 |
| H | 1.501487 | -3.27578 | -1.91436 |
| H | 1.385953 | -1.80212 | -1.2742  |
| H | -0.82972 | 0.153216 | 2.084414 |
| H | -3.59334 | -2.45439 | -0.35078 |
| H | -1.16008 | -3.28403 | 1.267194 |
| H | -2.64751 | -4.07035 | 1.67195  |

<sup>5</sup>Pr<sub>A,C3</sub>

|   |          |          |          |
|---|----------|----------|----------|
| C | -1.44014 | 1.751338 | -5.19461 |
| H | -2.50681 | 1.539206 | -5.03709 |
| C | -1.07601 | 3.138905 | -4.65562 |
| H | -0.04326 | 3.389701 | -4.92081 |
| H | -1.70476 | 3.902124 | -5.1321  |
| C | -1.22933 | 3.232677 | -3.13165 |
| H | -2.21628 | 2.867478 | -2.81938 |
| H | -0.48267 | 2.586961 | -2.64638 |
| C | -1.03917 | 4.649653 | -2.60478 |
| O | -0.36906 | 5.491582 | -3.22228 |
| N | -1.65081 | 4.93691  | -1.43236 |
| H | -2.13276 | 4.216863 | -0.90035 |
| H | -1.54509 | 5.872284 | -1.04593 |
| C | -5.25596 | 7.668238 | -1.34571 |
| H | -6.11504 | 7.172402 | -1.81292 |
| C | -4.85793 | 6.989965 | -0.03158 |
| H | -4.57938 | 5.946746 | -0.23433 |
| H | -3.94779 | 7.466259 | 0.351961 |
| C | -5.93009 | 7.009373 | 1.020446 |
| N | -5.75258 | 6.402527 | 2.259669 |
| C | -6.87774 | 6.581584 | 2.926421 |
| H | -7.08554 | 6.226586 | 3.926629 |
| N | -7.77795 | 7.28013  | 2.189456 |
| H | -8.71394 | 7.532057 | 2.471377 |
| C | -7.18828 | 7.558276 | 0.968871 |
| H | -7.70847 | 8.099725 | 0.194684 |
| C | 3.24824  | -6.54206 | 3.903383 |
| C | 4.38106  | -5.52466 | 4.060555 |
| C | 2.206138 | -6.304   | 2.789158 |
| O | 4.853431 | -5.29405 | 5.171618 |
| C | 1.593349 | -4.93199 | 2.797348 |
| C | 0.775673 | -4.26654 | 3.683661 |
| N | 1.855025 | -4.02029 | 1.791583 |
| C | 1.209297 | -2.87335 | 2.08537  |
| N | 0.542999 | -2.98552 | 3.231086 |
| H | 3.709225 | -7.52869 | 3.752813 |
| H | 2.659042 | -6.46906 | 1.807149 |
| H | 1.422821 | -7.06446 | 2.901411 |
| H | 0.342123 | -4.61778 | 4.609005 |
| H | 1.231704 | -2.00197 | 1.444633 |
| H | 2.481169 | -4.23398 | 0.973726 |
| N | 4.847658 | -4.91282 | 2.927463 |
| H | 4.481507 | -5.13931 | 2.001126 |
| C | 5.971163 | -3.99586 | 2.996948 |
| H | 6.526611 | -4.2094  | 3.914636 |



|   |          |          |          |
|---|----------|----------|----------|
| C | 5.647038 | -2.49141 | 2.994815 |
| O | 6.551977 | -1.68089 | 2.785272 |
| N | 4.354981 | -2.15534 | 3.220761 |
| C | 3.800411 | -0.79832 | 3.144194 |
| C | 4.443372 | -0.00996 | 1.986876 |
| C | 3.817547 | -0.03426 | 4.477722 |
| O | 4.874515 | 1.129823 | 2.117064 |
| C | 2.892985 | 1.197544 | 4.495709 |
| C | 1.38694  | 0.96931  | 4.258001 |
| O | 0.658952 | 1.956784 | 4.039555 |
| O | 0.971058 | -0.24764 | 4.317139 |
| H | 3.705025 | -2.91508 | 3.373804 |
| H | 2.749457 | -0.9391  | 2.877539 |
| H | 3.516532 | -0.74188 | 5.258657 |
| H | 4.842337 | 0.28546  | 4.69424  |
| H | 3.242561 | 1.928304 | 3.761279 |
| H | 2.97854  | 1.693754 | 5.473319 |
| N | 4.466212 | -0.6934  | 0.80243  |
| H | 3.81241  | -1.46067 | 0.699441 |
| C | 4.720499 | -0.01492 | -0.46286 |
| H | 4.811898 | -0.81817 | -1.20667 |
| C | 3.568514 | 0.900617 | -0.88008 |
| H | 3.421637 | 1.656864 | -0.10148 |
| H | 3.839972 | 1.446007 | -1.7863  |
| C | 2.241263 | 0.167442 | -1.13786 |
| O | 1.402784 | 0.811887 | -1.8327  |
| O | 2.072398 | -0.99519 | -0.65156 |
| C | 6.081783 | 0.696985 | -0.48186 |
| O | 6.294646 | 1.651309 | -1.23683 |
| N | 7.074151 | 0.115514 | 0.24916  |
| H | 6.81005  | -0.53673 | 0.98628  |
| C | 8.385221 | 0.753686 | 0.35283  |
| H | 8.240079 | 1.835319 | 0.458429 |
| C | 9.143077 | 0.221412 | 1.572989 |
| H | 9.274635 | -0.86479 | 1.5117   |
| H | 8.590298 | 0.44095  | 2.490786 |
| H | 10.12773 | 0.693384 | 1.614861 |
| C | 9.24642  | 0.605804 | -0.92119 |
| O | 10.30486 | 1.216129 | -1.03278 |
| N | 8.742009 | -0.22804 | -1.87241 |
| H | 7.869792 | -0.69525 | -1.66267 |
| C | 9.305055 | -0.39659 | -3.19565 |
| H | 10.34646 | -0.06277 | -3.13665 |
| C | 9.279501 | -1.88761 | -3.6232  |
| H | 9.966262 | -2.43668 | -2.96866 |
| H | 9.669895 | -1.93178 | -4.64329 |
| C | 7.894439 | -2.50025 | -3.55451 |

|   |          |          |          |
|---|----------|----------|----------|
| C | 7.41975  | -3.07566 | -2.36501 |
| H | 8.083788 | -3.14547 | -1.50557 |
| C | 6.108507 | -3.54946 | -2.26408 |
| H | 5.748428 | -3.96694 | -1.32736 |
| C | 5.251779 | -3.47856 | -3.36646 |
| H | 4.233044 | -3.84732 | -3.28307 |
| C | 5.722533 | -2.93393 | -4.56458 |
| H | 5.06677  | -2.88031 | -5.4301  |
| C | 7.027136 | -2.44428 | -4.65669 |
| H | 7.379238 | -1.99668 | -5.58212 |
| C | 8.64828  | 0.489844 | -4.28729 |
| O | 8.980297 | 0.334192 | -5.46606 |
| N | 7.761738 | 1.416302 | -3.85805 |
| H | 7.510011 | 1.458954 | -2.87305 |
| C | 7.150739 | 2.400768 | -4.7421  |
| H | 7.602576 | 2.262009 | -5.72628 |
| C | 5.616941 | 2.308677 | -4.80106 |
| H | 5.225282 | 2.447667 | -3.78448 |
| H | 5.257994 | 3.163968 | -5.39535 |
| C | 5.03424  | 1.009306 | -5.38908 |
| H | 5.381844 | 0.175085 | -4.76452 |
| C | 3.498469 | 1.038235 | -5.32465 |
| H | 3.072125 | 0.105505 | -5.71394 |
| H | 3.126674 | 1.167183 | -4.30113 |
| H | 3.096897 | 1.86184  | -5.93175 |
| C | 5.516423 | 0.750306 | -6.82524 |
| H | 6.601556 | 0.611518 | -6.87085 |
| H | 5.047073 | -0.15384 | -7.23342 |
| H | 5.247953 | 1.586326 | -7.48688 |
| C | -5.36213 | -1.75584 | -5.65927 |
| H | -4.66796 | -2.28172 | -6.3218  |
| C | -4.68414 | -1.47156 | -4.30927 |
| H | -3.83942 | -0.78597 | -4.45832 |
| H | -5.38314 | -0.96017 | -3.6392  |
| C | -4.14801 | -2.70747 | -3.58422 |
| O | -4.24228 | -3.8311  | -4.14789 |
| O | -3.63671 | -2.51732 | -2.43039 |
| C | -6.6681  | -2.53149 | -5.50663 |
| O | -7.68954 | -2.02026 | -5.04948 |
| N | -6.62965 | -3.83539 | -5.92702 |
| H | -5.70664 | -4.23967 | -6.02282 |
| C | -7.7558  | -4.72338 | -5.71228 |
| H | -8.67294 | -4.15742 | -5.89009 |
| C | -7.90001 | -5.35983 | -4.31691 |
| O | -8.86331 | -6.07566 | -4.07286 |
| N | -6.9199  | -5.06493 | -3.41494 |
| H | -6.10272 | -4.54073 | -3.72053 |

|   |          |          |          |
|---|----------|----------|----------|
| C | -6.91566 | -5.64134 | -2.07745 |
| H | -7.39728 | -6.62237 | -2.1291  |
| C | -5.47579 | -5.81074 | -1.55486 |
| H | -5.56134 | -6.13811 | -0.51487 |
| H | -4.96802 | -4.83993 | -1.57502 |
| C | -4.6815  | -6.87771 | -2.30943 |
| O | -4.93955 | -8.06706 | -2.2119  |
| N | -3.6214  | -6.3982  | -3.06282 |
| H | -3.73873 | -5.46178 | -3.47609 |
| H | -3.23281 | -7.10091 | -3.68443 |
| C | -7.71462 | -4.84057 | -1.02234 |
| O | -7.84637 | -5.30005 | 0.110297 |
| N | -8.216   | -3.63525 | -1.38888 |
| H | -8.10799 | -3.31451 | -2.34269 |
| C | -9.01522 | -2.8679  | -0.43997 |
| H | -8.4495  | -2.78259 | 0.494791 |
| C | -9.40244 | -1.47827 | -0.96591 |
| H | -9.95068 | -1.58971 | -1.91047 |
| H | -10.1209 | -1.0622  | -0.24569 |
| C | -8.2517  | -0.50919 | -1.16271 |
| C | -7.93889 | -0.01551 | -2.43602 |
| H | -8.50413 | -0.34872 | -3.30131 |
| C | -6.87752 | 0.867042 | -2.62867 |
| H | -6.63605 | 1.240878 | -3.61926 |
| C | -6.08614 | 1.265632 | -1.54622 |
| O | -5.01069 | 2.066246 | -1.82009 |
| H | -4.47643 | 2.26534  | -1.00838 |
| C | -6.40043 | 0.808828 | -0.25704 |
| H | -5.81473 | 1.125346 | 0.603503 |
| C | -7.47475 | -0.06609 | -0.08254 |
| H | -7.70036 | -0.41378 | 0.923686 |
| C | 4.938896 | -7.51567 | -0.45408 |
| H | 5.616208 | -6.86878 | 0.111369 |
| C | 4.18571  | -6.72264 | -1.5228  |
| H | 4.897956 | -6.31502 | -2.25337 |
| H | 3.511098 | -7.36932 | -2.09509 |
| C | 3.354067 | -5.53331 | -1.01042 |
| O | 2.442007 | -5.12294 | -1.76703 |
| O | 3.667084 | -5.03552 | 0.127415 |
| C | -0.52703 | -4.29483 | 9.25166  |
| C | -0.25224 | -3.35319 | 8.125651 |
| C | -0.90919 | -3.10722 | 6.945952 |
| N | 0.833227 | -2.48939 | 8.106165 |
| C | 0.793811 | -1.77924 | 6.94679  |
| N | -0.25091 | -2.13033 | 6.224865 |
| H | -0.68845 | -3.7676  | 10.20128 |
| H | -1.43066 | -4.8719  | 9.036608 |

|   |          |          |          |
|---|----------|----------|----------|
| H | -1.80726 | -3.56326 | 6.5564   |
| H | 1.525913 | -1.04141 | 6.658152 |
| H | 1.549213 | -2.41827 | 8.814757 |
| C | -0.64246 | 9.565842 | 1.140795 |
| H | 0.177452 | 10.29279 | 1.174969 |
| C | -0.57778 | 8.655424 | 2.388266 |
| H | 0.347318 | 8.064136 | 2.366024 |
| H | -0.50852 | 9.304163 | 3.272477 |
| C | -1.78448 | 7.719901 | 2.505637 |
| H | -2.71109 | 8.310222 | 2.450552 |
| H | -1.79259 | 7.065501 | 1.632031 |
| C | -1.834   | 6.843779 | 3.765792 |
| H | -0.87732 | 6.355605 | 3.968642 |
| H | -2.08038 | 7.43056  | 4.657709 |
| N | -2.87714 | 5.815246 | 3.61376  |
| H | -3.81516 | 6.192181 | 3.484753 |
| C | -2.66651 | 4.708677 | 2.853766 |
| N | -1.46545 | 4.20531  | 2.652301 |
| H | -0.61866 | 4.50743  | 3.172437 |
| H | -1.38617 | 3.310893 | 2.144888 |
| N | -3.76049 | 4.090899 | 2.325263 |
| H | -4.58611 | 4.687495 | 2.24614  |
| H | -3.57865 | 3.489332 | 1.512853 |
| C | -0.62912 | 8.811994 | -0.19089 |
| O | -1.47768 | 7.951474 | -0.46181 |
| N | 0.341795 | 9.190573 | -1.05825 |
| H | 1.130634 | 9.726649 | -0.71345 |
| C | 0.620216 | 8.487896 | -2.3031  |
| H | -0.11685 | 7.697971 | -2.45059 |
| C | 2.054138 | 7.945151 | -2.21854 |
| O | 2.930458 | 8.627233 | -1.67883 |
| N | 2.236991 | 6.717488 | -2.75048 |
| H | 1.40482  | 6.2004   | -3.04066 |
| C | 3.48479  | 5.978266 | -2.57656 |
| H | 4.261028 | 6.713742 | -2.35113 |
| C | 3.391103 | 4.918156 | -1.46258 |
| H | 2.635156 | 4.174079 | -1.74294 |
| H | 4.345667 | 4.381741 | -1.39888 |
| C | 3.045116 | 5.524186 | -0.09817 |
| H | 3.833809 | 6.209469 | 0.230206 |
| H | 2.117139 | 6.102094 | -0.15514 |
| S | 2.873285 | 4.292084 | 1.250144 |
| C | 1.344749 | 3.426838 | 0.738056 |
| H | 1.072248 | 2.763674 | 1.561602 |
| H | 0.53164  | 4.139858 | 0.573931 |
| H | 1.487502 | 2.824223 | -0.16156 |
| O | -2.70489 | -0.42319 | 4.67893  |

|    |          |          |          |
|----|----------|----------|----------|
| C  | -3.20207 | -1.58701 | 4.613972 |
| O  | -2.47662 | -2.58657 | 4.292301 |
| C  | -4.67955 | -1.8298  | 4.895413 |
| C  | -5.39693 | -0.67942 | 5.603704 |
| H  | -5.15872 | -2.03539 | 3.927646 |
| H  | -4.75321 | -2.76495 | 5.463452 |
| H  | -5.37828 | 0.21869  | 4.981352 |
| H  | -6.44242 | -0.94485 | 5.80093  |
| O  | -1.30702 | -0.70418 | 2.017005 |
| O  | -4.29874 | 1.116702 | 2.872865 |
| Fe | -0.66999 | -1.42754 | 4.124734 |
| C  | -1.81692 | -1.04458 | 0.72608  |
| H  | -0.97385 | -1.15065 | 0.028058 |
| C  | -2.74895 | 0.075608 | 0.181641 |
| H  | -3.74531 | -0.03996 | 0.618211 |
| C  | -2.35086 | 1.542275 | 0.492475 |
| O  | -3.0818  | 2.451956 | -0.02168 |
| O  | -1.3861  | 1.756115 | 1.258918 |
| H  | -0.83626 | -3.91377 | -1.52616 |
| N  | -2.87456 | -0.08558 | -1.30822 |
| H  | -1.91984 | -0.19548 | -1.80025 |
| H  | -3.39096 | 0.710103 | -1.70775 |
| H  | -3.37373 | -0.95703 | -1.60347 |
| C  | -2.60289 | -2.36158 | 0.821451 |
| H  | -3.25945 | -2.28341 | 1.693658 |
| C  | -1.73236 | -3.63154 | 0.93649  |
| C  | -2.0982  | -4.7484  | -0.0336  |
| H  | -1.50283 | -5.64199 | 0.172941 |
| H  | -3.15558 | -5.02169 | 0.015357 |
| N  | -1.80205 | -4.346   | -1.45134 |
| H  | -1.89494 | -5.16212 | -2.06876 |
| H  | -2.50358 | -3.64418 | -1.81462 |
| H  | 0.294049 | -5.00789 | 9.40291  |
| H  | 2.76036  | -6.57519 | 4.881934 |
| H  | 5.532182 | -8.31853 | -0.90849 |
| H  | 4.249024 | -7.97801 | 0.262682 |
| H  | 6.639201 | -4.16088 | 2.146654 |
| H  | 7.429648 | 3.403259 | -4.38914 |
| H  | -4.91707 | -0.44321 | 6.559771 |
| H  | -5.61972 | -0.8007  | -6.12991 |
| H  | -7.7226  | -5.53902 | -6.44144 |
| H  | -9.92577 | -3.4324  | -0.19719 |
| H  | -4.41888 | 7.631868 | -2.04845 |
| H  | -5.51421 | 8.722771 | -1.18853 |
| H  | -1.57801 | 10.14099 | 1.168102 |
| H  | 0.556114 | 9.188487 | -3.14648 |
| H  | 3.742203 | 5.490393 | -3.52385 |

|   |          |          |          |
|---|----------|----------|----------|
| H | -1.24791 | 1.686789 | -6.27237 |
| H | -0.87117 | 0.959886 | -4.69479 |
| H | -3.67127 | 0.653409 | 3.470387 |
| H | -4.18947 | 2.057932 | 3.08926  |
| O | -0.62398 | -0.59691 | -2.6517  |
| H | -0.30381 | -1.51995 | -2.62139 |
| H | 0.172656 | -0.04925 | -2.33392 |
| O | 0.918625 | 4.675676 | 3.993792 |
| H | 0.961699 | 3.695336 | 4.148229 |
| H | 1.596747 | 4.834475 | 3.306469 |
| O | 0.640815 | -3.08359 | -1.676   |
| H | 1.360427 | -3.77277 | -1.73601 |
| H | 1.079311 | -2.29575 | -1.25258 |
| H | -1.07819 | 0.260915 | 1.967837 |
| H | -3.26087 | -2.44042 | -0.05073 |
| H | -0.68376 | -3.38765 | 0.758887 |
| H | -1.78539 | -4.02762 | 1.953822 |

<sup>5</sup>TS1<sub>A,C4</sub>

|   |          |          |          |
|---|----------|----------|----------|
| C | -3.09533 | 0.249817 | -5.28247 |
| H | -3.99417 | -0.34169 | -5.06033 |
| C | -3.3325  | 1.73854  | -5.00911 |
| H | -2.45791 | 2.32378  | -5.31174 |
| H | -4.17313 | 2.106381 | -5.61354 |
| C | -3.60644 | 2.013852 | -3.5252  |
| H | -4.49098 | 1.463556 | -3.18188 |
| H | -2.75733 | 1.635393 | -2.93912 |
| C | -3.75499 | 3.496263 | -3.20751 |
| O | -3.09584 | 4.355235 | -3.81219 |
| N | -4.62942 | 3.813813 | -2.22759 |
| H | -5.13551 | 3.089606 | -1.7269  |
| H | -4.69491 | 4.781309 | -1.91427 |
| C | -8.25142 | 4.752905 | -0.79901 |
| H | -9.00081 | 3.952837 | -0.78454 |
| C | -7.39126 | 4.738854 | 0.468846 |
| H | -6.85731 | 3.781004 | 0.529206 |
| H | -6.617   | 5.512469 | 0.384644 |
| C | -8.17351 | 4.936032 | 1.736376 |
| N | -7.57308 | 4.871152 | 2.989381 |
| C | -8.53457 | 5.063837 | 3.873065 |
| H | -8.41562 | 5.067898 | 4.948034 |
| N | -9.73086 | 5.257021 | 3.261882 |
| H | -10.6179 | 5.409944 | 3.718812 |
| C | -9.51666 | 5.175545 | 1.897141 |
| H | -10.3205 | 5.284479 | 1.186419 |
| C | 7.038538 | -4.14104 | 3.01367  |
| C | 7.663711 | -2.74773 | 3.130069 |
| C | 5.81014  | -4.28189 | 2.096096 |
| O | 8.167231 | -2.36004 | 4.179672 |
| C | 4.737964 | -3.27968 | 2.406308 |
| C | 4.469617 | -2.54237 | 3.535963 |
| N | 3.798422 | -2.89006 | 1.473825 |
| C | 3.004105 | -1.96395 | 2.047754 |
| N | 3.381097 | -1.72415 | 3.303029 |
| H | 7.822311 | -4.8323  | 2.676187 |
| H | 6.090154 | -4.19744 | 1.038287 |
| H | 5.420558 | -5.30413 | 2.191412 |
| H | 4.972263 | -2.54948 | 4.490517 |
| H | 2.192843 | -1.46942 | 1.536896 |
| H | 3.658226 | -3.38639 | 0.553118 |
| N | 7.654203 | -1.98089 | 1.993881 |
| H | 7.192295 | -2.33106 | 1.166117 |
| C | 8.235842 | -0.65404 | 1.936604 |
| H | 8.721584 | -0.48736 | 2.903282 |

|   |          |          |          |
|---|----------|----------|----------|
| C | 7.252561 | 0.495693 | 1.662399 |
| O | 7.634422 | 1.475215 | 1.018643 |
| N | 6.005353 | 0.365476 | 2.171115 |
| C | 4.949147 | 1.382219 | 2.044471 |
| C | 4.895023 | 1.942952 | 0.604707 |
| C | 5.043023 | 2.51023  | 3.087588 |
| O | 4.9293   | 3.142118 | 0.362707 |
| C | 3.694993 | 3.203511 | 3.34225  |
| C | 2.594569 | 2.347    | 3.993104 |
| O | 1.438427 | 2.763503 | 4.065346 |
| O | 3.007319 | 1.201438 | 4.473329 |
| H | 5.778839 | -0.47363 | 2.692797 |
| H | 4.017716 | 0.8347   | 2.215412 |
| H | 5.420328 | 2.076687 | 4.018995 |
| H | 5.769919 | 3.248668 | 2.737091 |
| H | 3.294386 | 3.613484 | 2.409008 |
| H | 3.846665 | 4.069541 | 4.000993 |
| N | 4.814265 | 0.979734 | -0.36558 |
| H | 4.421227 | 0.086999 | -0.08928 |
| C | 4.497154 | 1.321161 | -1.75134 |
| H | 4.504617 | 0.362007 | -2.28456 |
| C | 3.099658 | 1.927603 | -1.91209 |
| H | 2.996962 | 2.789754 | -1.2451  |
| H | 2.978157 | 2.304927 | -2.93035 |
| C | 1.964703 | 0.93237  | -1.62125 |
| O | 0.811375 | 1.317936 | -1.9701  |
| O | 2.261606 | -0.16981 | -1.06731 |
| C | 5.588413 | 2.151812 | -2.44304 |
| O | 5.359138 | 2.698332 | -3.52795 |
| N | 6.836895 | 2.131708 | -1.90117 |
| H | 6.956614 | 1.825314 | -0.93802 |
| C | 7.906137 | 2.931546 | -2.49594 |
| H | 7.489881 | 3.900571 | -2.79398 |
| C | 9.040128 | 3.154461 | -1.49059 |
| H | 9.449165 | 2.201918 | -1.13696 |
| H | 8.675065 | 3.704649 | -0.61875 |
| H | 9.836491 | 3.724459 | -1.97553 |
| C | 8.460702 | 2.341252 | -3.81054 |
| O | 9.219381 | 3.000649 | -4.51365 |
| N | 8.048904 | 1.077677 | -4.11372 |
| H | 7.44416  | 0.611894 | -3.44996 |
| C | 8.321983 | 0.42651  | -5.37909 |
| H | 9.138113 | 0.994514 | -5.83915 |
| C | 8.791522 | -1.03605 | -5.18208 |
| H | 9.790788 | -1.01102 | -4.73313 |
| H | 8.877547 | -1.47317 | -6.18087 |
| C | 7.867004 | -1.86718 | -4.3141  |



|   |          |          |          |
|---|----------|----------|----------|
| C | 8.173456 | -2.10668 | -2.96654 |
| H | 9.104782 | -1.72    | -2.55733 |
| C | 7.305679 | -2.83812 | -2.15069 |
| H | 7.580843 | -3.02818 | -1.11409 |
| C | 6.104887 | -3.33752 | -2.65893 |
| H | 5.415651 | -3.88914 | -2.02366 |
| C | 5.795922 | -3.10951 | -4.00393 |
| H | 4.867996 | -3.49735 | -4.41627 |
| C | 6.66671  | -2.39021 | -4.82405 |
| H | 6.421627 | -2.22609 | -5.86958 |
| C | 7.153002 | 0.500214 | -6.39779 |
| O | 7.205081 | -0.18575 | -7.42318 |
| N | 6.156534 | 1.367773 | -6.11168 |
| H | 6.160662 | 1.876953 | -5.23087 |
| C | 5.066102 | 1.655213 | -7.03713 |
| H | 5.275899 | 1.096916 | -7.95139 |
| C | 3.674774 | 1.32567  | -6.47364 |
| H | 3.51968  | 1.92437  | -5.56655 |
| H | 2.932082 | 1.673323 | -7.2084  |
| C | 3.402816 | -0.15489 | -6.146   |
| H | 4.12416  | -0.46318 | -5.37541 |
| C | 1.988925 | -0.31499 | -5.56417 |
| H | 1.80372  | -1.35072 | -5.25483 |
| H | 1.824309 | 0.326389 | -4.69051 |
| H | 1.228763 | -0.05301 | -6.31309 |
| C | 3.597448 | -1.07306 | -7.36339 |
| H | 4.629455 | -1.05473 | -7.72924 |
| H | 3.350495 | -2.11148 | -7.10815 |
| H | 2.936434 | -0.77328 | -8.18897 |
| C | -5.17632 | -4.07442 | -4.4097  |
| H | -4.25579 | -4.44791 | -4.86995 |
| C | -4.84006 | -3.30525 | -3.11594 |
| H | -4.3342  | -2.36738 | -3.37185 |
| H | -5.76684 | -3.02048 | -2.60035 |
| C | -3.95661 | -4.05895 | -2.11381 |
| O | -3.79107 | -5.3025  | -2.24767 |
| O | -3.45019 | -3.37984 | -1.16262 |
| C | -6.17432 | -5.20771 | -4.19429 |
| O | -7.38379 | -4.99941 | -4.06236 |
| N | -5.64428 | -6.46718 | -4.14933 |
| H | -4.65336 | -6.49917 | -3.93542 |
| C | -6.46548 | -7.59302 | -3.73305 |
| H | -7.36361 | -7.63312 | -4.353   |
| C | -6.96253 | -7.57435 | -2.27122 |
| O | -7.87138 | -8.31708 | -1.92176 |
| N | -6.33732 | -6.6806  | -1.45599 |
| H | -5.53961 | -6.16042 | -1.81574 |

|   |          |          |          |
|---|----------|----------|----------|
| C | -6.76314 | -6.4161  | -0.09091 |
| H | -7.18136 | -7.34359 | 0.314182 |
| C | -5.56717 | -5.98424 | 0.780002 |
| H | -5.95971 | -5.75877 | 1.773844 |
| H | -5.11634 | -5.07052 | 0.374399 |
| C | -4.53236 | -7.10146 | 0.915348 |
| O | -4.71571 | -8.06809 | 1.643387 |
| N | -3.38187 | -6.9261  | 0.183492 |
| H | -3.39782 | -6.32707 | -0.64703 |
| H | -2.78917 | -7.74668 | 0.137952 |
| C | -7.89299 | -5.35848 | 0.02353  |
| O | -8.27119 | -4.99109 | 1.136622 |
| N | -8.41212 | -4.89461 | -1.14057 |
| H | -8.05101 | -5.23619 | -2.02537 |
| C | -9.5977  | -4.05145 | -1.19245 |
| H | -9.81455 | -3.73908 | -0.16851 |
| C | -9.44834 | -2.85676 | -2.14207 |
| H | -9.13774 | -3.23416 | -3.12552 |
| H | -10.4527 | -2.43081 | -2.28589 |
| C | -8.49962 | -1.74661 | -1.71955 |
| C | -8.25288 | -0.69211 | -2.61476 |
| H | -8.72911 | -0.70558 | -3.5935  |
| C | -7.41444 | 0.370208 | -2.28917 |
| H | -7.23361 | 1.178258 | -2.99251 |
| C | -6.78514 | 0.394675 | -1.03999 |
| O | -5.93297 | 1.437848 | -0.75978 |
| H | -5.46952 | 1.269618 | 0.100138 |
| C | -7.01889 | -0.63986 | -0.12866 |
| H | -6.53335 | -0.61816 | 0.842446 |
| C | -7.868   | -1.69711 | -0.47064 |
| H | -8.02204 | -2.48941 | 0.256597 |
| C | 4.085081 | -7.35738 | -1.1336  |
| H | 4.82244  | -6.80353 | -1.72198 |
| C | 2.704654 | -6.71064 | -1.23945 |
| H | 2.347468 | -6.73475 | -2.2787  |
| H | 1.958595 | -7.27307 | -0.66345 |
| C | 2.63326  | -5.24729 | -0.77881 |
| O | 1.474528 | -4.74132 | -0.67044 |
| O | 3.714812 | -4.63451 | -0.55408 |
| C | 6.004901 | -2.59843 | 8.673966 |
| C | 5.244923 | -1.74289 | 7.714997 |
| C | 4.12842  | -1.97653 | 6.95319  |
| N | 5.606623 | -0.43766 | 7.412684 |
| C | 4.727218 | 0.052543 | 6.502096 |
| N | 3.820293 | -0.85709 | 6.202756 |
| H | 6.044774 | -2.15632 | 9.678059 |
| H | 5.519499 | -3.57429 | 8.761198 |

|   |          |          |          |
|---|----------|----------|----------|
| H | 3.517747 | -2.86418 | 6.887761 |
| H | 4.761971 | 1.046779 | 6.085756 |
| H | 6.406076 | 0.05665  | 7.782082 |
| C | -4.22301 | 8.707626 | 0.18307  |
| H | -3.80613 | 9.698128 | -0.03433 |
| C | -3.52152 | 8.115204 | 1.427304 |
| H | -2.45716 | 7.952978 | 1.211135 |
| H | -3.5629  | 8.872613 | 2.222583 |
| C | -4.16945 | 6.817508 | 1.919758 |
| H | -5.25804 | 6.963768 | 1.962732 |
| H | -4.00304 | 6.01698  | 1.192442 |
| C | -3.70348 | 6.34787  | 3.30587  |
| H | -2.6383  | 6.106531 | 3.330513 |
| H | -3.86025 | 7.136729 | 4.0521   |
| N | -4.48281 | 5.176713 | 3.724494 |
| H | -5.49047 | 5.315652 | 3.644591 |
| C | -4.13355 | 3.895476 | 3.43299  |
| N | -2.87517 | 3.508353 | 3.274369 |
| H | -2.04666 | 4.094094 | 3.47853  |
| H | -2.72507 | 2.497871 | 3.170426 |
| N | -5.13073 | 2.990616 | 3.352242 |
| H | -6.06555 | 3.370631 | 3.223669 |
| H | -4.92522 | 2.105084 | 2.879824 |
| C | -4.13077 | 7.810335 | -1.05046 |
| O | -4.75646 | 6.745331 | -1.12496 |
| N | -3.32978 | 8.286804 | -2.03655 |
| H | -2.68969 | 9.041834 | -1.81304 |
| C | -2.88687 | 7.494636 | -3.17318 |
| H | -3.38776 | 6.527304 | -3.17651 |
| C | -1.36033 | 7.360932 | -3.07691 |
| O | -0.69403 | 8.312988 | -2.65656 |
| N | -0.85705 | 6.172465 | -3.46966 |
| H | -1.51634 | 5.423495 | -3.68547 |
| C | 0.562596 | 5.857425 | -3.3424  |
| H | 1.089903 | 6.813065 | -3.28648 |
| C | 0.897413 | 4.98874  | -2.11466 |
| H | 0.490716 | 3.978285 | -2.24079 |
| H | 1.987298 | 4.876893 | -2.07629 |
| C | 0.40533  | 5.606082 | -0.80113 |
| H | 0.790136 | 6.62552  | -0.68941 |
| H | -0.68778 | 5.671953 | -0.78485 |
| S | 0.951044 | 4.721429 | 0.713092 |
| C | -0.0968  | 3.219159 | 0.678863 |
| H | 0.148082 | 2.665017 | 1.589721 |
| H | -1.15795 | 3.488793 | 0.702055 |
| H | 0.123882 | 2.601975 | -0.19539 |
| O | 0.852463 | -0.42607 | 6.356865 |

|    |          |          |          |
|----|----------|----------|----------|
| C  | 0.73199  | -1.69794 | 6.425961 |
| O  | 1.411513 | -2.42834 | 5.643195 |
| C  | -0.2555  | -2.31198 | 7.39567  |
| C  | -0.44344 | -1.51049 | 8.686939 |
| H  | -1.20742 | -2.35079 | 6.849596 |
| H  | 0.055833 | -3.34357 | 7.592414 |
| H  | -0.78354 | -0.49747 | 8.45817  |
| H  | -1.19151 | -1.99008 | 9.32817  |
| O  | 0.934005 | -0.42746 | 3.502404 |
| O  | -2.01059 | -0.39985 | 5.466542 |
| Fe | 2.172002 | -0.54074 | 4.694894 |
| C  | -1.31088 | -0.95067 | 1.293257 |
| H  | -0.92594 | 0.063292 | 1.436342 |
| H  | -0.81863 | -1.32403 | 0.394038 |
| C  | -2.83383 | -0.8448  | 1.077933 |
| H  | -3.33927 | -1.74661 | 1.442112 |
| C  | -3.44812 | 0.341634 | 1.868197 |
| O  | -4.51536 | 0.861082 | 1.420554 |
| O  | -2.85851 | 0.685027 | 2.914398 |
| H  | -0.60305 | -3.17024 | -0.22411 |
| N  | -3.18813 | -0.7413  | -0.38237 |
| H  | -2.36474 | -0.43864 | -1.00677 |
| H  | -3.97075 | -0.08803 | -0.49145 |
| H  | -3.46356 | -1.68173 | -0.75964 |
| C  | -0.9329  | -1.78964 | 2.517095 |
| H  | -1.6843  | -1.73532 | 3.310361 |
| H  | -0.0332  | -1.18515 | 3.046254 |
| C  | -0.39665 | -3.20989 | 2.327302 |
| H  | -0.22699 | -3.63642 | 3.322016 |
| H  | 0.58238  | -3.19748 | 1.834266 |
| C  | -1.29838 | -4.17112 | 1.532767 |
| H  | -1.10498 | -5.20949 | 1.809037 |
| H  | -2.35981 | -3.98377 | 1.711854 |
| N  | -1.0678  | -4.06476 | 0.049207 |
| H  | -0.36715 | -4.75478 | -0.28033 |
| H  | -1.97061 | -4.10115 | -0.47965 |
| H  | 7.036851 | -2.76805 | 8.340674 |
| H  | 6.789328 | -4.43442 | 4.037493 |
| H  | 4.061961 | -8.39334 | -1.49326 |
| H  | 4.437151 | -7.36603 | -0.09604 |
| H  | 8.999996 | -0.59098 | 1.15563  |
| H  | 5.099385 | 2.724312 | -7.28802 |
| H  | 0.492333 | -1.43501 | 9.253606 |
| H  | -5.64762 | -3.37914 | -5.11184 |
| H  | -5.90428 | -8.51745 | -3.90123 |
| H  | -10.4513 | -4.65444 | -1.5334  |
| H  | -7.62127 | 4.606723 | -1.68121 |

|   |          |          |          |
|---|----------|----------|----------|
| H | -8.77248 | 5.710603 | -0.91891 |
| H | -5.28864 | 8.844232 | 0.40398  |
| H | -3.13553 | 8.013659 | -4.1087  |
| H | 0.89017  | 5.341102 | -4.2521  |
| H | -2.83821 | 0.076471 | -6.33415 |
| H | -2.28076 | -0.13442 | -4.65817 |
| H | -1.09269 | -0.09431 | 5.569728 |
| H | -2.30542 | -0.0016  | 4.628005 |
| O | -1.21985 | -0.36355 | -2.15133 |
| H | -0.71902 | -1.20765 | -2.11096 |
| H | -0.4826  | 0.318091 | -2.05143 |
| O | -0.43995 | 4.875006 | 3.697989 |
| H | 0.203537 | 4.184598 | 3.974501 |
| H | -0.09107 | 5.147575 | 2.825125 |
| O | 0.57307  | -2.23174 | -1.1899  |
| H | 1.143149 | -3.03875 | -1.18668 |
| H | 1.182672 | -1.43691 | -1.09686 |

<sup>5</sup>IM1<sub>A,C4</sub>

|   |          |          |          |
|---|----------|----------|----------|
| C | -2.077   | 1.654779 | -4.69414 |
| H | -3.05501 | 1.541601 | -4.20969 |
| C | -1.5624  | 3.089884 | -4.54593 |
| H | -0.64789 | 3.236427 | -5.13081 |
| H | -2.30482 | 3.791035 | -4.95225 |
| C | -1.25874 | 3.46524  | -3.08244 |
| H | -2.11815 | 3.235958 | -2.43922 |
| H | -0.41554 | 2.860588 | -2.72273 |
| C | -0.8722  | 4.931794 | -2.96599 |
| O | 0.016023 | 5.42591  | -3.67478 |
| N | -1.57162 | 5.678799 | -2.07782 |
| H | -2.26097 | 5.261042 | -1.46935 |
| H | -1.37483 | 6.675481 | -1.98471 |
| C | -5.08252 | 8.725662 | -2.44229 |
| H | -6.01214 | 8.33232  | -2.87065 |
| C | -4.67575 | 7.960231 | -1.17965 |
| H | -4.50617 | 6.904353 | -1.43079 |
| H | -3.70585 | 8.336766 | -0.83065 |
| C | -5.68501 | 8.032902 | -0.06882 |
| N | -5.50673 | 7.348362 | 1.127758 |
| C | -6.56596 | 7.612271 | 1.869485 |
| H | -6.75165 | 7.233286 | 2.865273 |
| N | -7.42594 | 8.4369   | 1.21905  |
| H | -8.31003 | 8.775121 | 1.569859 |
| C | -6.87778 | 8.713011 | -0.02135 |
| H | -7.3775  | 9.346868 | -0.73673 |
| C | 2.633822 | -5.89148 | 4.438553 |
| C | 3.978781 | -5.16988 | 4.330235 |
| C | 1.538156 | -5.53238 | 3.413839 |
| O | 4.650582 | -4.96077 | 5.337068 |
| C | 1.254785 | -4.06035 | 3.300439 |
| C | 0.811508 | -3.12439 | 4.204139 |
| N | 1.446331 | -3.36316 | 2.119374 |
| C | 1.122098 | -2.06945 | 2.329812 |
| N | 0.73633  | -1.89051 | 3.592777 |
| H | 2.831757 | -6.97119 | 4.382872 |
| H | 1.811069 | -5.90549 | 2.423079 |
| H | 0.624844 | -6.06717 | 3.706494 |
| H | 0.539195 | -3.25338 | 5.239724 |
| H | 1.18757  | -1.2986  | 1.574229 |
| H | 1.847891 | -3.80419 | 1.263567 |
| N | 4.39664  | -4.79064 | 3.081733 |
| H | 3.859706 | -5.02126 | 2.245848 |
| C | 5.694915 | -4.16422 | 2.902145 |
| H | 6.335129 | -4.45764 | 3.738723 |

|   |          |          |          |
|---|----------|----------|----------|
| C | 5.72629  | -2.62715 | 2.822359 |
| O | 6.763455 | -2.06614 | 2.463876 |
| N | 4.578204 | -1.98504 | 3.141973 |
| C | 4.362627 | -0.53613 | 3.041227 |
| C | 4.992285 | 0.016685 | 1.744904 |
| C | 4.784105 | 0.248302 | 4.294453 |
| O | 5.650692 | 1.049566 | 1.712335 |
| C | 4.16229  | 1.652423 | 4.376773 |
| C | 2.635845 | 1.752046 | 4.53075  |
| O | 2.099619 | 2.858    | 4.463683 |
| O | 2.010363 | 0.628774 | 4.771794 |
| H | 3.80064  | -2.55552 | 3.446065 |
| H | 3.279686 | -0.42019 | 2.931012 |
| H | 4.488244 | -0.34358 | 5.167794 |
| H | 5.875342 | 0.337405 | 4.304831 |
| H | 4.440412 | 2.237993 | 3.495702 |
| H | 4.590422 | 2.188567 | 5.234992 |
| N | 4.730155 | -0.74943 | 0.643904 |
| H | 3.918794 | -1.35591 | 0.690205 |
| C | 4.936434 | -0.24961 | -0.70956 |
| H | 4.786117 | -1.12362 | -1.35855 |
| C | 3.899109 | 0.804931 | -1.10631 |
| H | 3.92323  | 1.628768 | -0.38262 |
| H | 4.148903 | 1.232866 | -2.07966 |
| C | 2.473842 | 0.226815 | -1.16496 |
| O | 1.622359 | 0.876437 | -1.82752 |
| O | 2.261228 | -0.86068 | -0.53176 |
| C | 6.390455 | 0.162736 | -0.9666  |
| O | 6.685384 | 0.964529 | -1.85841 |
| N | 7.333047 | -0.5459  | -0.28258 |
| H | 7.044166 | -1.06049 | 0.547688 |
| C | 8.752102 | -0.23914 | -0.43352 |
| H | 8.866611 | 0.848899 | -0.50325 |
| C | 9.543244 | -0.7583  | 0.770747 |
| H | 9.408277 | -1.83867 | 0.895206 |
| H | 9.202697 | -0.26961 | 1.688243 |
| H | 10.60513 | -0.55104 | 0.617719 |
| C | 9.357999 | -0.77104 | -1.75146 |
| O | 10.5044  | -0.47738 | -2.07442 |
| N | 8.532174 | -1.55494 | -2.50086 |
| H | 7.615323 | -1.75513 | -2.12387 |
| C | 8.843099 | -2.01224 | -3.83914 |
| H | 9.928241 | -1.91535 | -3.95156 |
| C | 8.456776 | -3.50097 | -4.03176 |
| H | 9.085498 | -4.09789 | -3.36097 |
| H | 8.713449 | -3.76257 | -5.06166 |
| C | 6.992452 | -3.79158 | -3.76504 |

|   |          |          |          |
|---|----------|----------|----------|
| C | 6.539698 | -4.10293 | -2.4727  |
| H | 7.260494 | -4.18664 | -1.66144 |
| C | 5.181177 | -4.30824 | -2.21252 |
| H | 4.842077 | -4.53063 | -1.204   |
| C | 4.250371 | -4.22523 | -3.25153 |
| H | 3.19521  | -4.3886  | -3.04919 |
| C | 4.690697 | -3.93472 | -4.54561 |
| H | 3.974823 | -3.87181 | -5.36133 |
| C | 6.045882 | -3.71404 | -4.79898 |
| H | 6.3812   | -3.46634 | -5.8022  |
| C | 8.230714 | -1.1417  | -4.968   |
| O | 8.336865 | -1.51737 | -6.13902 |
| N | 7.638429 | 0.012181 | -4.5854  |
| H | 7.562946 | 0.240642 | -3.59701 |
| C | 7.109219 | 0.986694 | -5.53166 |
| H | 7.379047 | 0.635315 | -6.52936 |
| C | 5.59452  | 1.214292 | -5.39822 |
| H | 5.388459 | 1.554171 | -4.37449 |
| H | 5.326268 | 2.048958 | -6.06478 |
| C | 4.692752 | 0.006771 | -5.71876 |
| H | 4.960672 | -0.80454 | -5.02777 |
| C | 3.217471 | 0.365002 | -5.47632 |
| H | 2.567251 | -0.49543 | -5.67655 |
| H | 3.028402 | 0.684224 | -4.44461 |
| H | 2.898631 | 1.179927 | -6.1412  |
| C | 4.898603 | -0.51259 | -7.15111 |
| H | 5.916509 | -0.88437 | -7.30781 |
| H | 4.205905 | -1.33609 | -7.36643 |
| H | 4.703871 | 0.280245 | -7.88745 |
| C | -5.3456  | -3.48981 | -5.18031 |
| H | -4.60417 | -4.17655 | -5.60153 |
| C | -4.7699  | -2.79799 | -3.93258 |
| H | -3.96764 | -2.11244 | -4.22993 |
| H | -5.54257 | -2.17552 | -3.46619 |
| C | -4.20701 | -3.73447 | -2.85797 |
| O | -4.44614 | -4.97067 | -2.93745 |
| O | -3.53407 | -3.18574 | -1.92624 |
| C | -6.66607 | -4.21012 | -4.92335 |
| O | -7.73098 | -3.60725 | -4.78119 |
| N | -6.58933 | -5.57674 | -4.88476 |
| H | -5.66776 | -5.95166 | -4.6935  |
| C | -7.74476 | -6.37553 | -4.52249 |
| H | -8.61365 | -5.99681 | -5.06538 |
| C | -8.14443 | -6.40195 | -3.03574 |
| O | -9.17907 | -6.96239 | -2.6942  |
| N | -7.29955 | -5.76534 | -2.17661 |
| H | -6.41344 | -5.40212 | -2.52313 |



|   |          |          |          |
|---|----------|----------|----------|
| C | -7.55152 | -5.72494 | -0.74343 |
| H | -8.10002 | -6.63357 | -0.4746  |
| C | -6.22942 | -5.69519 | 0.043602 |
| H | -6.48938 | -5.55278 | 1.095378 |
| H | -5.61778 | -4.84565 | -0.28383 |
| C | -5.46754 | -7.0151  | -0.08106 |
| O | -5.85044 | -8.03614 | 0.475051 |
| N | -4.31914 | -6.95628 | -0.83188 |
| H | -4.21882 | -6.22472 | -1.54522 |
| H | -3.90934 | -7.85909 | -1.04192 |
| C | -8.45227 | -4.55581 | -0.27989 |
| O | -8.73854 | -4.44834 | 0.910924 |
| N | -8.89353 | -3.69352 | -1.23094 |
| H | -8.6586  | -3.86327 | -2.20153 |
| C | -9.87423 | -2.67003 | -0.89601 |
| H | -9.61777 | -2.28757 | 0.096302 |
| C | -9.93267 | -1.53458 | -1.92798 |
| H | -10.178  | -1.9527  | -2.91269 |
| H | -10.7845 | -0.89809 | -1.64808 |
| C | -8.67356 | -0.69751 | -2.04029 |
| C | -7.97547 | -0.61292 | -3.25224 |
| H | -8.32142 | -1.18019 | -4.11142 |
| C | -6.80867 | 0.141108 | -3.36558 |
| H | -6.2671  | 0.198131 | -4.30521 |
| C | -6.29857 | 0.815369 | -2.25223 |
| O | -5.10707 | 1.472751 | -2.39616 |
| H | -4.79643 | 1.844346 | -1.52634 |
| C | -6.99741 | 0.767939 | -1.03749 |
| H | -6.61651 | 1.311503 | -0.17659 |
| C | -8.17257 | 0.020806 | -0.94586 |
| H | -8.69906 | -0.00996 | 0.005992 |
| C | 3.541152 | -7.78515 | 0.193052 |
| H | 4.390788 | -7.17349 | 0.510332 |
| C | 2.726044 | -7.07387 | -0.88745 |
| H | 3.346492 | -6.91922 | -1.78143 |
| H | 1.879693 | -7.68717 | -1.21733 |
| C | 2.17638  | -5.69217 | -0.5037  |
| O | 1.213323 | -5.25493 | -1.19569 |
| O | 2.738584 | -5.0621  | 0.449777 |
| C | -0.24553 | -2.93254 | 9.59346  |
| C | 0.203556 | -2.08862 | 8.446176 |
| C | -0.3954  | -1.74778 | 7.259479 |
| N | 1.43593  | -1.45273 | 8.407401 |
| C | 1.532533 | -0.77566 | 7.232824 |
| N | 0.438177 | -0.93359 | 6.51503  |
| H | -0.29771 | -2.36118 | 10.52955 |
| H | -1.24475 | -3.32817 | 9.39164  |

|   |          |          |          |
|---|----------|----------|----------|
| H | -1.3664  | -2.03348 | 6.883901 |
| H | 2.389939 | -0.19731 | 6.927368 |
| H | 2.151322 | -1.49766 | 9.118887 |
| C | -0.05446 | 9.97041  | 0.07448  |
| H | 0.825714 | 10.61948 | 0.153777 |
| C | -0.11983 | 9.032684 | 1.305298 |
| H | 0.799538 | 8.435588 | 1.365636 |
| H | -0.13769 | 9.66426  | 2.204183 |
| C | -1.34136 | 8.108895 | 1.283162 |
| H | -2.23809 | 8.705396 | 1.064409 |
| H | -1.24201 | 7.403244 | 0.454133 |
| C | -1.59997 | 7.303858 | 2.563779 |
| H | -0.73639 | 6.708404 | 2.869276 |
| H | -1.83674 | 7.965012 | 3.405765 |
| N | -2.75765 | 6.423159 | 2.358643 |
| H | -3.62235 | 6.912461 | 2.127425 |
| C | -2.6789  | 5.2108   | 1.759017 |
| N | -1.57001 | 4.473127 | 1.779807 |
| H | -0.7888  | 4.674718 | 2.430193 |
| H | -1.68984 | 3.489419 | 1.531402 |
| N | -3.75635 | 4.779835 | 1.080854 |
| H | -4.57088 | 5.384613 | 1.050469 |
| H | -3.81045 | 3.82254  | 0.710854 |
| C | -0.05358 | 9.216433 | -1.25384 |
| O | -1.07023 | 8.639034 | -1.66683 |
| N | 1.117536 | 9.223738 | -1.93019 |
| H | 1.95744  | 9.582779 | -1.48816 |
| C | 1.388947 | 8.387722 | -3.09073 |
| H | 0.555771 | 7.705275 | -3.26029 |
| C | 2.706542 | 7.65056  | -2.81583 |
| O | 3.624848 | 8.247752 | -2.24544 |
| N | 2.748419 | 6.366398 | -3.22932 |
| H | 1.872622 | 5.937283 | -3.53164 |
| C | 3.875546 | 5.493263 | -2.91106 |
| H | 4.720131 | 6.145564 | -2.67639 |
| C | 3.586727 | 4.535419 | -1.73944 |
| H | 2.802973 | 3.826115 | -2.03228 |
| H | 4.489873 | 3.942022 | -1.55384 |
| C | 3.17877  | 5.272726 | -0.45951 |
| H | 3.968141 | 5.965809 | -0.14891 |
| H | 2.275438 | 5.868113 | -0.63077 |
| S | 2.888078 | 4.191758 | 0.996194 |
| C | 1.366865 | 3.310289 | 0.485247 |
| H | 1.064371 | 2.689077 | 1.334045 |
| H | 0.5693   | 4.025083 | 0.259274 |
| H | 1.54121  | 2.661248 | -0.37483 |
| O | -1.30372 | 1.238004 | 5.416963 |

|    |          |          |          |
|----|----------|----------|----------|
| C  | -2.17315 | 0.301732 | 5.354688 |
| O  | -1.8789  | -0.77386 | 4.74978  |
| C  | -3.53257 | 0.48965  | 5.995406 |
| C  | -3.44354 | 1.02397  | 7.431824 |
| H  | -4.06317 | 1.218535 | 5.36998  |
| H  | -4.06951 | -0.46303 | 5.951208 |
| H  | -2.91858 | 1.983052 | 7.451068 |
| H  | -4.44608 | 1.169077 | 7.849433 |
| O  | -0.05288 | 0.768522 | 2.741136 |
| O  | -3.22885 | 3.013641 | 4.02849  |
| Fe | 0.17446  | 0.043103 | 4.39264  |
| C  | -2.68572 | -1.11084 | 1.211432 |
| H  | -2.7995  | -0.71812 | 2.234734 |
| H  | -1.60978 | -1.01684 | 1.006007 |
| C  | -3.46359 | -0.18109 | 0.281028 |
| H  | -4.54031 | -0.35868 | 0.393755 |
| C  | -3.23929 | 1.331    | 0.576657 |
| O  | -3.89178 | 2.15676  | -0.13212 |
| O  | -2.47293 | 1.651654 | 1.519161 |
| H  | -0.81535 | -3.5552  | -0.43229 |
| N  | -3.15328 | -0.46732 | -1.16407 |
| H  | -2.11382 | -0.34357 | -1.42949 |
| H  | -3.7023  | 0.155959 | -1.77587 |
| H  | -3.38852 | -1.45549 | -1.428   |
| C  | -3.1131  | -2.54339 | 1.165116 |
| C  | -2.26492 | -3.609   | 1.786596 |
| C  | -1.97047 | -4.81107 | 0.871748 |
| H  | -1.18646 | -5.43495 | 1.3098   |
| H  | -2.85195 | -5.43437 | 0.702848 |
| N  | -1.49266 | -4.36159 | -0.47323 |
| H  | -0.94367 | -5.09144 | -0.94638 |
| H  | -2.30007 | -4.04583 | -1.07336 |
| H  | 0.422559 | -3.78716 | 9.762458 |
| H  | 2.287006 | -5.69536 | 5.457422 |
| H  | 3.927656 | -8.74236 | -0.17644 |
| H  | 2.933201 | -7.9935  | 1.08201  |
| H  | 6.154436 | -4.52597 | 1.97781  |
| H  | 7.625126 | 1.942431 | -5.36677 |
| H  | -2.90031 | 0.329935 | 8.084157 |
| H  | -5.55829 | -2.72407 | -5.93436 |
| H  | -7.58049 | -7.40954 | -4.84157 |
| H  | -10.8723 | -3.12436 | -0.80657 |
| H  | -4.29758 | 8.643042 | -3.19949 |
| H  | -5.22942 | 9.791872 | -2.23118 |
| H  | -0.94044 | 10.61664 | 0.070859 |
| H  | 1.515195 | 9.011088 | -3.98676 |
| H  | 4.132822 | 4.910249 | -3.80296 |

|   |          |          |          |
|---|----------|----------|----------|
| H | -2.19878 | 1.395646 | -5.75321 |
| H | -1.39267 | 0.930016 | -4.23913 |
| H | -2.44423 | 2.760209 | 4.548558 |
| H | -3.09026 | 2.537718 | 3.189789 |
| O | -0.70964 | -0.40888 | -2.19197 |
| H | -0.37394 | -1.32818 | -2.10037 |
| H | 0.104259 | 0.146863 | -2.00072 |
| O | 0.700016 | 4.980183 | 3.363124 |
| H | 0.97498  | 4.208821 | 3.906368 |
| H | 1.437678 | 5.049017 | 2.722429 |
| O | 0.443746 | -2.64251 | -1.09999 |
| H | 0.947272 | -3.47856 | -1.26823 |
| H | 1.113104 | -1.93398 | -0.84511 |
| H | -0.92917 | 0.954028 | 2.345585 |
| H | -4.1233  | -2.79372 | 0.848004 |
| H | -1.31746 | -3.17201 | 2.11596  |
| H | -2.74323 | -4.01468 | 2.693507 |

<sup>5</sup>TS2<sub>A,C4</sub>

|   |          |          |          |
|---|----------|----------|----------|
| C | -1.76896 | 2.008027 | -4.89478 |
| H | -2.80151 | 1.66174  | -4.75059 |
| C | -1.56891 | 3.391679 | -4.26712 |
| H | -0.57504 | 3.782417 | -4.51052 |
| H | -2.2901  | 4.101258 | -4.69429 |
| C | -1.72496 | 3.362616 | -2.73944 |
| H | -2.65752 | 2.858084 | -2.45963 |
| H | -0.90026 | 2.781357 | -2.30198 |
| C | -1.69992 | 4.753541 | -2.12133 |
| O | -0.98453 | 5.6581   | -2.57746 |
| N | -2.51049 | 4.947137 | -1.05466 |
| H | -3.05507 | 4.183597 | -0.66241 |
| H | -2.51998 | 5.86019  | -0.60753 |
| C | -6.38241 | 8.03535  | -0.66645 |
| H | -7.27308 | 7.650739 | -1.1776  |
| C | -5.94458 | 7.115204 | 0.476857 |
| H | -5.69758 | 6.12398  | 0.072666 |
| H | -5.00786 | 7.49671  | 0.900302 |
| C | -6.97235 | 6.95056  | 1.560086 |
| N | -6.76536 | 6.100682 | 2.640749 |
| C | -7.85368 | 6.16996  | 3.383435 |
| H | -8.03182 | 5.623818 | 4.299821 |
| N | -8.75932 | 7.02744  | 2.846864 |
| H | -9.67188 | 7.243737 | 3.220224 |
| C | -8.21138 | 7.531845 | 1.680295 |
| H | -8.74407 | 8.233067 | 1.057602 |
| C | 4.811209 | -6.52659 | 3.066607 |
| C | 5.736221 | -5.3112  | 3.170815 |
| C | 3.572721 | -6.42476 | 2.151453 |
| O | 6.334547 | -5.08223 | 4.219595 |
| C | 2.716618 | -5.21757 | 2.408384 |
| C | 1.961696 | -4.8068  | 3.48217  |
| N | 2.604345 | -4.20557 | 1.471718 |
| C | 1.814335 | -3.24571 | 1.979135 |
| N | 1.404179 | -3.57488 | 3.206003 |
| H | 5.424171 | -7.37823 | 2.738853 |
| H | 3.877648 | -6.40555 | 1.10098  |
| H | 2.981929 | -7.33947 | 2.287361 |
| H | 1.781548 | -5.30406 | 4.423253 |
| H | 1.549691 | -2.33937 | 1.455475 |
| H | 3.130671 | -4.21303 | 0.552945 |
| N | 5.885297 | -4.52526 | 2.058559 |
| H | 5.425742 | -4.74695 | 1.172822 |
| C | 6.837536 | -3.42928 | 2.061424 |
| H | 7.576851 | -3.62021 | 2.844197 |

|   |          |          |          |
|---|----------|----------|----------|
| C | 6.284684 | -2.01314 | 2.295331 |
| O | 7.023711 | -1.04379 | 2.114728 |
| N | 4.988875 | -1.92657 | 2.679614 |
| C | 4.225137 | -0.68035 | 2.815761 |
| C | 4.62235  | 0.330051 | 1.716585 |
| C | 4.268019 | -0.05784 | 4.221716 |
| O | 4.919889 | 1.491434 | 1.966346 |
| C | 3.120383 | 0.941987 | 4.473513 |
| C | 1.709622 | 0.348819 | 4.371761 |
| O | 0.764541 | 1.019542 | 3.915568 |
| O | 1.592815 | -0.87255 | 4.797358 |
| H | 4.485313 | -2.79841 | 2.777813 |
| H | 3.188531 | -0.96792 | 2.606929 |
| H | 4.215002 | -0.87319 | 4.949989 |
| H | 5.226043 | 0.454435 | 4.352175 |
| H | 3.193491 | 1.786823 | 3.785492 |
| H | 3.223107 | 1.347342 | 5.490427 |
| N | 4.603388 | -0.1993  | 0.456874 |
| H | 4.000054 | -1.00261 | 0.306779 |
| C | 4.629592 | 0.658123 | -0.72337 |
| H | 4.760797 | -0.02788 | -1.57177 |
| C | 3.315467 | 1.415669 | -0.91834 |
| H | 3.136196 | 2.048429 | -0.04159 |
| H | 3.400124 | 2.088751 | -1.7736  |
| C | 2.095228 | 0.503868 | -1.13854 |
| O | 1.107064 | 1.062886 | -1.69507 |
| O | 2.154772 | -0.70539 | -0.75177 |
| C | 5.864197 | 1.569158 | -0.76619 |
| O | 5.859672 | 2.623901 | -1.41058 |
| N | 7.001503 | 1.067865 | -0.20777 |
| H | 6.917163 | 0.305152 | 0.462529 |
| C | 8.221474 | 1.871277 | -0.16639 |
| H | 7.948981 | 2.908304 | 0.061819 |
| C | 9.172583 | 1.34566  | 0.913086 |
| H | 9.431061 | 0.296106 | 0.73311  |
| H | 8.703578 | 1.410994 | 1.898967 |
| H | 10.08888 | 1.940961 | 0.901633 |
| C | 8.945996 | 1.955454 | -1.52874 |
| O | 9.898185 | 2.713017 | -1.68467 |
| N | 8.445346 | 1.145817 | -2.50269 |
| H | 7.671566 | 0.545146 | -2.25041 |
| C | 8.867527 | 1.16812  | -3.88721 |
| H | 9.860886 | 1.628986 | -3.90448 |
| C | 8.972099 | -0.27113 | -4.45695 |
| H | 9.793876 | -0.77889 | -3.93892 |
| H | 9.240332 | -0.17526 | -5.51235 |
| C | 7.690077 | -1.06551 | -4.30089 |

|   |          |          |          |
|---|----------|----------|----------|
| C | 7.443912 | -1.81391 | -3.13874 |
| H | 8.216524 | -1.8801  | -2.37507 |
| C | 6.222452 | -2.46543 | -2.94421 |
| H | 6.038628 | -3.02217 | -2.02887 |
| C | 5.22812  | -2.39746 | -3.92437 |
| H | 4.27944  | -2.90351 | -3.76702 |
| C | 5.47292  | -1.67838 | -5.09778 |
| H | 4.709297 | -1.62502 | -5.86969 |
| C | 6.688041 | -1.01546 | -5.2827  |
| H | 6.863289 | -0.43635 | -6.18532 |
| C | 7.986926 | 2.052185 | -4.81002 |
| O | 8.200646 | 2.046803 | -6.02564 |
| N | 7.045564 | 2.809259 | -4.20208 |
| H | 6.906659 | 2.734335 | -3.19715 |
| C | 6.221712 | 3.77689  | -4.91606 |
| H | 6.570886 | 3.782951 | -5.95041 |
| C | 4.714047 | 3.488554 | -4.82614 |
| H | 4.428523 | 3.478183 | -3.76562 |
| H | 4.187945 | 4.340943 | -5.28437 |
| C | 4.228223 | 2.184916 | -5.48817 |
| H | 4.745514 | 1.348513 | -4.99833 |
| C | 2.718671 | 2.003024 | -5.26077 |
| H | 2.364326 | 1.066217 | -5.70784 |
| H | 2.457903 | 1.976334 | -4.19613 |
| H | 2.15198  | 2.823353 | -5.72347 |
| C | 4.565856 | 2.130527 | -6.98686 |
| H | 5.646704 | 2.146035 | -7.16213 |
| H | 4.16809  | 1.213519 | -7.43999 |
| H | 4.118589 | 2.980608 | -7.5217  |
| C | -5.17667 | -2.59224 | -5.77225 |
| H | -4.37804 | -3.06128 | -6.355   |
| C | -4.62404 | -2.10357 | -4.42318 |
| H | -3.87405 | -1.32021 | -4.59439 |
| H | -5.42333 | -1.63998 | -3.83653 |
| C | -3.96989 | -3.18452 | -3.55888 |
| O | -3.87766 | -4.35615 | -4.02198 |
| O | -3.56684 | -2.82849 | -2.40495 |
| C | -6.36301 | -3.53916 | -5.61314 |
| O | -7.47766 | -3.15075 | -5.26241 |
| N | -6.10539 | -4.85396 | -5.90023 |
| H | -5.12767 | -5.11736 | -5.88549 |
| C | -7.10012 | -5.8804  | -5.65329 |
| H | -8.07203 | -5.50202 | -5.97765 |
| C | -7.28279 | -6.35072 | -4.19734 |
| O | -8.16981 | -7.15    | -3.92331 |
| N | -6.42508 | -5.81539 | -3.28294 |
| H | -5.65777 | -5.22817 | -3.60321 |

|   |          |          |          |
|---|----------|----------|----------|
| C | -6.47753 | -6.17836 | -1.8741  |
| H | -6.84753 | -7.20615 | -1.80579 |
| C | -5.0781  | -6.10405 | -1.2304  |
| H | -5.21711 | -6.29583 | -0.16314 |
| H | -4.67056 | -5.09395 | -1.35374 |
| C | -4.12559 | -7.16948 | -1.77466 |
| O | -4.24335 | -8.35113 | -1.48829 |
| N | -3.10321 | -6.69307 | -2.57865 |
| H | -3.29462 | -5.83961 | -3.12352 |
| H | -2.61573 | -7.43126 | -3.07674 |
| C | -7.45723 | -5.3324  | -1.02573 |
| O | -7.61641 | -5.60491 | 0.162381 |
| N | -8.09818 | -4.30605 | -1.64015 |
| H | -7.96795 | -4.15747 | -2.63336 |
| C | -9.11979 | -3.5542  | -0.921   |
| H | -8.7228  | -3.31687 | 0.071383 |
| C | -9.55717 | -2.278   | -1.65514 |
| H | -9.92118 | -2.54423 | -2.65601 |
| H | -10.4289 | -1.888   | -1.11029 |
| C | -8.49855 | -1.19847 | -1.77635 |
| C | -8.05481 | -0.76525 | -3.03285 |
| H | -8.45051 | -1.22668 | -3.93269 |
| C | -7.0668  | 0.210318 | -3.15633 |
| H | -6.71957 | 0.534027 | -4.13315 |
| C | -6.47919 | 0.766691 | -2.01534 |
| O | -5.44928 | 1.645729 | -2.194   |
| H | -5.06797 | 1.937953 | -1.31988 |
| C | -6.94021 | 0.376843 | -0.74867 |
| H | -6.51337 | 0.830887 | 0.141871 |
| C | -7.93862 | -0.59248 | -0.64285 |
| H | -8.27563 | -0.88859 | 0.348736 |
| C | 5.819402 | -6.75818 | -1.64216 |
| H | 6.474536 | -6.10443 | -1.05844 |
| C | 4.82507  | -5.94355 | -2.47046 |
| H | 5.367185 | -5.32345 | -3.19749 |
| H | 4.175245 | -6.5963  | -3.06418 |
| C | 3.911706 | -4.99432 | -1.67488 |
| O | 2.865049 | -4.6114  | -2.24374 |
| O | 4.297273 | -4.64681 | -0.50079 |
| C | 1.347493 | -5.86259 | 8.843113 |
| C | 1.366565 | -4.73478 | 7.864606 |
| C | 0.545944 | -4.40939 | 6.814386 |
| N | 2.327511 | -3.73295 | 7.87909  |
| C | 2.062568 | -2.86789 | 6.866638 |
| N | 0.989066 | -3.25161 | 6.204036 |
| H | 1.237329 | -5.50933 | 9.876749 |
| H | 0.503119 | -6.523   | 8.627581 |



|   |          |          |          |
|---|----------|----------|----------|
| H | -0.33442 | -4.9187  | 6.451602 |
| H | 2.646504 | -1.99051 | 6.636768 |
| H | 3.106569 | -3.66575 | 8.518468 |
| C | -1.8493  | 9.533931 | 1.92821  |
| H | -1.09626 | 10.32398 | 2.031642 |
| C | -1.72316 | 8.541708 | 3.107702 |
| H | -0.75524 | 8.025479 | 3.049216 |
| H | -1.7083  | 9.123197 | 4.039955 |
| C | -2.85734 | 7.513647 | 3.135255 |
| H | -3.82353 | 8.038346 | 3.174358 |
| H | -2.84671 | 6.970836 | 2.187506 |
| C | -2.80909 | 6.488509 | 4.276314 |
| H | -1.81954 | 6.035759 | 4.376015 |
| H | -3.04291 | 6.943128 | 5.245302 |
| N | -3.79583 | 5.42061  | 4.037885 |
| H | -4.75251 | 5.76387  | 3.991952 |
| C | -3.55141 | 4.481805 | 3.074164 |
| N | -2.32547 | 4.04014  | 2.838388 |
| H | -1.55158 | 4.097676 | 3.521819 |
| H | -2.24176 | 3.272823 | 2.15295  |
| N | -4.59314 | 4.022286 | 2.363791 |
| H | -5.45259 | 4.572687 | 2.372744 |
| H | -4.43688 | 3.362648 | 1.598355 |
| C | -1.73993 | 8.869592 | 0.554038 |
| O | -2.57227 | 8.039896 | 0.162676 |
| N | -0.68897 | 9.277318 | -0.19742 |
| H | 0.06618  | 9.795244 | 0.239885 |
| C | -0.29577 | 8.636559 | -1.44257 |
| H | -0.959   | 7.797079 | -1.65413 |
| C | 1.168981 | 8.199783 | -1.29507 |
| O | 1.947784 | 8.893114 | -0.63292 |
| N | 1.489809 | 7.050598 | -1.92585 |
| H | 0.723538 | 6.493532 | -2.30779 |
| C | 2.790168 | 6.407328 | -1.7569  |
| H | 3.470667 | 7.165885 | -1.36236 |
| C | 2.722101 | 5.184322 | -0.82381 |
| H | 2.03557  | 4.448186 | -1.25934 |
| H | 3.70893  | 4.707838 | -0.78906 |
| C | 2.264106 | 5.548322 | 0.59242  |
| H | 2.995958 | 6.203301 | 1.077392 |
| H | 1.311824 | 6.087807 | 0.564916 |
| S | 2.074726 | 4.111985 | 1.720271 |
| C | 0.622675 | 3.273157 | 0.988147 |
| H | 0.340494 | 2.483731 | 1.687395 |
| H | -0.21351 | 3.96958  | 0.878682 |
| H | 0.852616 | 2.811261 | 0.02555  |
| O | -1.49246 | -1.52271 | 5.53116  |

|    |          |          |          |
|----|----------|----------|----------|
| C  | -2.10412 | -2.60838 | 5.278448 |
| O  | -1.48712 | -3.53571 | 4.654464 |
| C  | -3.54164 | -2.82369 | 5.707672 |
| C  | -4.24636 | -1.56768 | 6.222943 |
| H  | -4.06943 | -3.25325 | 4.847526 |
| H  | -3.53088 | -3.61516 | 6.470857 |
| H  | -4.25493 | -0.78517 | 5.458632 |
| H  | -5.28091 | -1.80072 | 6.500282 |
| O  | -0.43165 | -1.42062 | 2.807014 |
| O  | -2.84572 | 0.727459 | 4.051332 |
| Fe | 0.190863 | -2.22479 | 4.340923 |
| C  | -2.23122 | -0.86905 | 0.866716 |
| H  | -2.23463 | -0.45102 | 1.876747 |
| H  | -1.23873 | -0.65497 | 0.457807 |
| C  | -3.28315 | -0.05625 | 0.111627 |
| H  | -4.29373 | -0.36614 | 0.403134 |
| C  | -3.16359 | 1.458242 | 0.462611 |
| O  | -4.01792 | 2.264318 | -0.04665 |
| O  | -2.27454 | 1.788073 | 1.272409 |
| H  | -0.59562 | -3.77537 | -1.43023 |
| N  | -3.20031 | -0.26827 | -1.37607 |
| H  | -2.19455 | -0.25757 | -1.75388 |
| H  | -3.77528 | 0.421662 | -1.87981 |
| H  | -3.53257 | -1.21979 | -1.66235 |
| C  | -2.47298 | -2.3298  | 0.995345 |
| C  | -1.42261 | -3.38448 | 1.057454 |
| C  | -1.67837 | -4.61409 | 0.182562 |
| H  | -0.95632 | -5.40187 | 0.416762 |
| H  | -2.68475 | -5.02009 | 0.316982 |
| N  | -1.50971 | -4.28759 | -1.27075 |
| H  | -1.55148 | -5.15244 | -1.82365 |
| H  | -2.29887 | -3.69083 | -1.63692 |
| H  | 2.262995 | -6.46636 | 8.793604 |
| H  | 4.509787 | -6.74176 | 4.096024 |
| H  | 6.448178 | -7.38215 | -2.28905 |
| H  | 5.304351 | -7.42345 | -0.93816 |
| H  | 7.36     | -3.39171 | 1.100813 |
| H  | 6.415388 | 4.77344  | -4.49572 |
| H  | -3.736   | -1.16528 | 7.103654 |
| H  | -5.54196 | -1.72671 | -6.33591 |
| H  | -6.86915 | -6.7623  | -6.25913 |
| H  | -9.99864 | -4.19432 | -0.75658 |
| H  | -5.57789 | 8.121686 | -1.40226 |
| H  | -6.60878 | 9.044971 | -0.30179 |
| H  | -2.83305 | 10.01897 | 1.971885 |
| H  | -0.36844 | 9.351408 | -2.27401 |
| H  | 3.162146 | 6.093666 | -2.7395  |

|   |          |          |          |
|---|----------|----------|----------|
| H | -1.57738 | 2.035436 | -5.97425 |
| H | -1.10654 | 1.259082 | -4.44687 |
| H | -2.20671 | 0.158508 | 4.516104 |
| H | -2.36717 | 1.071282 | 3.279475 |
| O | -0.7979  | -0.52011 | -2.53319 |
| H | -0.38555 | -1.40609 | -2.52953 |
| H | -0.06352 | 0.089376 | -2.19761 |
| O | 0.041043 | 3.830319 | 4.348751 |
| H | 0.222687 | 2.865744 | 4.324517 |
| H | 0.720783 | 4.195239 | 3.746534 |
| O | 0.806398 | -2.8602  | -1.69442 |
| H | 1.58423  | -3.43836 | -1.91545 |
| H | 1.203975 | -2.04009 | -1.28814 |
| H | -0.2577  | -0.45896 | 2.894084 |
| H | -3.49069 | -2.64028 | 1.244447 |
| H | -0.45132 | -2.97022 | 0.787442 |
| H | -1.32444 | -3.74747 | 2.091264 |

<sup>5</sup>Pr<sub>A,C4</sub>

|   |          |          |          |
|---|----------|----------|----------|
| C | 2.712173 | 0.113258 | -5.91315 |
| H | 3.531206 | 0.743424 | -5.53981 |
| C | 3.011349 | -1.371   | -5.67823 |
| H | 2.226323 | -1.99203 | -6.1224  |
| H | 3.944384 | -1.65295 | -6.18367 |
| C | 3.120461 | -1.71185 | -4.18708 |
| H | 3.8943   | -1.09925 | -3.70907 |
| H | 2.170089 | -1.47209 | -3.68966 |
| C | 3.414662 | -3.18505 | -3.93525 |
| O | 3.095191 | -4.05881 | -4.75519 |
| N | 4.041259 | -3.48285 | -2.77368 |
| H | 4.223096 | -2.77043 | -2.07389 |
| H | 4.252232 | -4.4585  | -2.57238 |
| C | 8.305499 | -4.67809 | -2.97337 |
| H | 8.955883 | -3.83983 | -3.2508  |
| C | 7.681353 | -4.47667 | -1.58966 |
| H | 7.067259 | -3.56574 | -1.59672 |
| H | 6.98219  | -5.29858 | -1.39345 |
| C | 8.680875 | -4.37606 | -0.4728  |
| N | 8.28896  | -4.13996 | 0.84021  |
| C | 9.39638  | -4.09199 | 1.556362 |
| H | 9.455059 | -3.9159  | 2.621861 |
| N | 10.49177 | -4.28968 | 0.779105 |
| H | 11.45244 | -4.28985 | 1.089075 |
| C | 10.05065 | -4.47046 | -0.52021 |
| H | 10.7354  | -4.63845 | -1.33638 |
| C | -5.45381 | 2.331331 | 6.222321 |
| C | -6.08899 | 1.118846 | 5.533039 |
| C | -4.37486 | 3.134346 | 5.459061 |
| O | -6.39424 | 0.12546  | 6.190015 |
| C | -3.2544  | 2.29972  | 4.910501 |
| C | -2.16636 | 1.669473 | 5.474215 |
| N | -3.2146  | 1.958688 | 3.57066  |
| C | -2.14688 | 1.160642 | 3.376727 |
| N | -1.48311 | 0.960067 | 4.507599 |
| H | -6.26935 | 3.014403 | 6.500476 |
| H | -4.83056 | 3.684226 | 4.62926  |
| H | -3.97502 | 3.887666 | 6.14866  |
| H | -1.82964 | 1.678589 | 6.501271 |
| H | -1.87182 | 0.761565 | 2.413695 |
| H | -3.89333 | 2.31333  | 2.853372 |
| N | -6.3327  | 1.207306 | 4.188907 |
| H | -6.07632 | 2.030879 | 3.640862 |
| C | -7.04198 | 0.149728 | 3.493606 |
| H | -7.64672 | -0.39663 | 4.222955 |

|   |          |          |          |
|---|----------|----------|----------|
| C | -6.19903 | -0.90086 | 2.750281 |
| O | -6.76708 | -1.72746 | 2.031643 |
| N | -4.86046 | -0.83782 | 2.930655 |
| C | -3.88031 | -1.80259 | 2.416985 |
| C | -4.17227 | -2.17967 | 0.95219  |
| C | -3.70944 | -3.03716 | 3.32238  |
| O | -4.17465 | -3.34144 | 0.561656 |
| C | -2.38538 | -3.79655 | 3.116823 |
| C | -1.10161 | -3.07825 | 3.555488 |
| O | -0.06352 | -3.77573 | 3.726597 |
| O | -1.15333 | -1.81318 | 3.711422 |
| H | -4.52111 | -0.12531 | 3.563865 |
| H | -2.92445 | -1.27332 | 2.422258 |
| H | -3.77785 | -2.69431 | 4.36178  |
| H | -4.54491 | -3.72177 | 3.145129 |
| H | -2.28047 | -4.06719 | 2.058753 |
| H | -2.41854 | -4.74877 | 3.65879  |
| N | -4.37399 | -1.11761 | 0.116981 |
| H | -4.2698  | -0.18298 | 0.488003 |
| C | -4.44467 | -1.2559  | -1.33581 |
| H | -4.59601 | -0.24067 | -1.72092 |
| C | -3.13765 | -1.77341 | -1.94319 |
| H | -2.82017 | -2.68731 | -1.4363  |
| H | -3.32516 | -2.04445 | -2.98814 |
| C | -1.99493 | -0.74936 | -1.93465 |
| O | -0.83459 | -1.25113 | -2.10061 |
| O | -2.25769 | 0.480497 | -1.83763 |
| C | -5.65374 | -2.07823 | -1.81773 |
| O | -5.70025 | -2.48155 | -2.98661 |
| N | -6.69555 | -2.24455 | -0.96079 |
| H | -6.57209 | -2.01694 | 0.025249 |
| C | -7.7945  | -3.14675 | -1.308   |
| H | -7.37043 | -4.02591 | -1.80713 |
| C | -8.54277 | -3.59129 | -0.04726 |
| H | -8.93236 | -2.73006 | 0.505603 |
| H | -7.87145 | -4.13961 | 0.619835 |
| H | -9.37611 | -4.23548 | -0.3382  |
| C | -8.78238 | -2.57048 | -2.34473 |
| O | -9.65255 | -3.28397 | -2.83412 |
| N | -8.60674 | -1.25806 | -2.66207 |
| H | -7.87161 | -0.75717 | -2.18009 |
| C | -9.32334 | -0.5791  | -3.72285 |
| H | -10.1897 | -1.20711 | -3.9559  |
| C | -9.82451 | 0.814508 | -3.26258 |
| H | -10.5753 | 0.658609 | -2.47928 |
| H | -10.3168 | 1.275666 | -4.1226  |
| C | -8.70917 | 1.701244 | -2.74766 |

|   |          |          |          |
|---|----------|----------|----------|
| C | -8.30679 | 1.643238 | -1.4038  |
| H | -8.85589 | 1.008701 | -0.71084 |
| C | -7.20714 | 2.374608 | -0.94788 |
| H | -6.89678 | 2.299678 | 0.091105 |
| C | -6.5005  | 3.199905 | -1.82719 |
| H | -5.63682 | 3.75312  | -1.46912 |
| C | -6.91443 | 3.292547 | -3.15854 |
| H | -6.37756 | 3.93792  | -3.84954 |
| C | -8.00262 | 2.547036 | -3.61661 |
| H | -8.29904 | 2.595545 | -4.66073 |
| C | -8.5208  | -0.45596 | -5.04564 |
| O | -8.96862 | 0.239383 | -5.96216 |
| N | -7.37047 | -1.16297 | -5.11332 |
| H | -7.04864 | -1.68859 | -4.30358 |
| C | -6.52332 | -1.19963 | -6.29836 |
| H | -7.07524 | -0.70205 | -7.09841 |
| C | -5.14102 | -0.56284 | -6.0733  |
| H | -4.65638 | -1.09165 | -5.24208 |
| H | -4.53032 | -0.75987 | -6.96827 |
| C | -5.13748 | 0.949402 | -5.78078 |
| H | -5.77602 | 1.121513 | -4.90426 |
| C | -3.72015 | 1.422481 | -5.42014 |
| H | -3.70764 | 2.502012 | -5.22324 |
| H | -3.33773 | 0.922679 | -4.52243 |
| H | -3.01731 | 1.228659 | -6.24257 |
| C | -5.71374 | 1.769689 | -6.94586 |
| H | -6.7661  | 1.528869 | -7.12874 |
| H | -5.6528  | 2.844079 | -6.73018 |
| H | -5.15061 | 1.588444 | -7.87256 |
| C | 3.433766 | 5.756243 | -4.69525 |
| H | 2.46941  | 6.096363 | -5.08576 |
| C | 3.227355 | 4.603271 | -3.70343 |
| H | 2.809873 | 3.733557 | -4.22608 |
| H | 4.195894 | 4.28685  | -3.29993 |
| C | 2.308065 | 4.932249 | -2.52188 |
| O | 1.887435 | 6.113222 | -2.39504 |
| O | 2.039531 | 3.971318 | -1.72852 |
| C | 4.217888 | 6.912409 | -4.08519 |
| O | 5.37713  | 6.783    | -3.68617 |
| N | 3.561253 | 8.109871 | -4.02778 |
| H | 2.555128 | 8.079429 | -4.12061 |
| C | 4.160936 | 9.268408 | -3.39138 |
| H | 5.18081  | 9.386938 | -3.76551 |
| C | 4.27242  | 9.25144  | -1.85529 |
| O | 4.876658 | 10.1524  | -1.286   |
| N | 3.689574 | 8.19925  | -1.21825 |
| H | 3.178993 | 7.497823 | -1.75244 |

|   |          |          |          |
|---|----------|----------|----------|
| C | 3.813609 | 8.024529 | 0.220382 |
| H | 3.79041  | 9.012874 | 0.687998 |
| C | 2.653972 | 7.177562 | 0.776045 |
| H | 2.860936 | 7.023461 | 1.838598 |
| H | 2.644451 | 6.202595 | 0.276544 |
| C | 1.298576 | 7.874262 | 0.661098 |
| O | 1.008868 | 8.850969 | 1.331605 |
| N | 0.407587 | 7.275131 | -0.22082 |
| H | 0.823076 | 6.819313 | -1.04669 |
| H | -0.40824 | 7.850455 | -0.4089  |
| C | 5.142984 | 7.37877  | 0.679447 |
| O | 5.392017 | 7.308762 | 1.881142 |
| N | 5.965971 | 6.879464 | -0.27785 |
| H | 5.749803 | 7.018833 | -1.25906 |
| C | 7.276005 | 6.361625 | 0.097609 |
| H | 7.14569  | 5.751054 | 0.996425 |
| C | 7.950791 | 5.562859 | -1.02479 |
| H | 8.0145   | 6.188577 | -1.92402 |
| H | 8.988617 | 5.390431 | -0.70413 |
| C | 7.307702 | 4.236377 | -1.38826 |
| C | 6.986016 | 3.944881 | -2.72105 |
| H | 7.138611 | 4.704175 | -3.4825  |
| C | 6.431634 | 2.718862 | -3.08527 |
| H | 6.180838 | 2.501281 | -4.11958 |
| C | 6.168755 | 1.751552 | -2.10997 |
| O | 5.572213 | 0.586706 | -2.51259 |
| H | 5.301011 | 0.024228 | -1.73473 |
| C | 6.493352 | 2.017183 | -0.77269 |
| H | 6.304181 | 1.262946 | -0.01269 |
| C | 7.060628 | 3.245586 | -0.42809 |
| H | 7.308308 | 3.429894 | 0.614998 |
| C | -6.99604 | 5.224606 | 2.661641 |
| H | -7.53537 | 4.287327 | 2.828988 |
| C | -6.12362 | 5.140475 | 1.408855 |
| H | -6.75685 | 4.991707 | 0.523642 |
| H | -5.58828 | 6.080928 | 1.234967 |
| C | -5.0783  | 4.012431 | 1.397232 |
| O | -4.14213 | 4.120542 | 0.569088 |
| O | -5.24557 | 3.034184 | 2.20545  |
| C | 0.078724 | -2.75583 | 9.914884 |
| C | -0.27159 | -2.18706 | 8.579298 |
| C | 0.495207 | -1.64909 | 7.576179 |
| N | -1.57353 | -2.11796 | 8.10193  |
| C | -1.54238 | -1.5588  | 6.862882 |
| N | -0.30505 | -1.26249 | 6.518186 |
| H | -0.21635 | -3.80971 | 10.00587 |
| H | 1.160765 | -2.70204 | 10.06327 |

|   |          |          |          |
|---|----------|----------|----------|
| H | 1.566931 | -1.51486 | 7.527615 |
| H | -2.41929 | -1.39407 | 6.255451 |
| H | -2.40352 | -2.43601 | 8.581362 |
| C | 4.725733 | -8.58854 | -1.26871 |
| H | 4.247899 | -9.55821 | -1.45153 |
| C | 4.333905 | -8.07546 | 0.135571 |
| H | 3.248068 | -7.91979 | 0.184045 |
| H | 4.56325  | -8.87299 | 0.855893 |
| C | 5.059816 | -6.78426 | 0.525759 |
| H | 6.140136 | -6.91257 | 0.36379  |
| H | 4.747131 | -5.99058 | -0.15612 |
| C | 4.835798 | -6.29707 | 1.964108 |
| H | 3.775722 | -6.26339 | 2.227785 |
| H | 5.319733 | -6.9584  | 2.692028 |
| N | 5.423932 | -4.95723 | 2.129217 |
| H | 6.424512 | -4.92856 | 1.939231 |
| C | 4.794298 | -3.84418 | 1.657507 |
| N | 3.476956 | -3.75387 | 1.581889 |
| H | 2.826855 | -4.46312 | 1.963518 |
| H | 3.087718 | -2.83569 | 1.332686 |
| N | 5.565188 | -2.79818 | 1.290629 |
| H | 6.548036 | -3.00365 | 1.119958 |
| H | 5.135665 | -2.06507 | 0.72078  |
| C | 4.411309 | -7.61697 | -2.40709 |
| O | 4.892078 | -6.47607 | -2.43996 |
| N | 3.618827 | -8.11356 | -3.38966 |
| H | 3.078162 | -8.95152 | -3.20677 |
| C | 3.083725 | -7.29796 | -4.47096 |
| H | 3.530244 | -6.30419 | -4.43255 |
| C | 1.55591  | -7.2653  | -4.32313 |
| O | 0.957721 | -8.291   | -3.98494 |
| N | 0.97574  | -6.07123 | -4.57337 |
| H | 1.590343 | -5.27116 | -4.72993 |
| C | -0.44397 | -5.8369  | -4.32168 |
| H | -0.93161 | -6.81439 | -4.35444 |
| C | -0.72181 | -5.14603 | -2.97097 |
| H | -0.35919 | -4.11104 | -2.99307 |
| H | -1.80863 | -5.08624 | -2.83575 |
| C | -0.09744 | -5.90124 | -1.79284 |
| H | -0.45357 | -6.93652 | -1.76935 |
| H | 0.992192 | -5.93755 | -1.89524 |
| S | -0.49079 | -5.21674 | -0.13831 |
| C | 0.410312 | -3.62232 | -0.18382 |
| H | 0.410044 | -3.24104 | 0.84054  |
| H | 1.447622 | -3.7808  | -0.49566 |
| H | -0.07582 | -2.89778 | -0.84167 |
| O | 3.141007 | -0.66612 | 6.007201 |



|    |          |          |          |
|----|----------|----------|----------|
| C  | 2.732663 | 0.506117 | 5.842955 |
| O  | 1.646088 | 0.847086 | 5.247212 |
| C  | 3.558154 | 1.675948 | 6.391184 |
| C  | 4.888684 | 1.272815 | 7.024588 |
| H  | 3.711311 | 2.382697 | 5.565284 |
| H  | 2.925235 | 2.20917  | 7.113863 |
| H  | 5.528922 | 0.76183  | 6.298287 |
| H  | 5.425728 | 2.152465 | 7.399894 |
| O  | 0.818964 | 0.253203 | 2.356858 |
| O  | 1.811698 | -1.86701 | 3.973715 |
| Fe | 0.236977 | -0.41291 | 4.480538 |
| C  | 1.356838 | 1.221883 | 0.186687 |
| H  | 0.677725 | 0.406531 | -0.07858 |
| H  | 0.978573 | 2.104959 | -0.32645 |
| C  | 2.758449 | 0.944212 | -0.36531 |
| H  | 3.483558 | 1.622975 | 0.103249 |
| C  | 3.275659 | -0.48992 | -0.07528 |
| O  | 4.33298  | -0.88182 | -0.67609 |
| O  | 2.660102 | -1.1415  | 0.793401 |
| H  | -0.74309 | 3.638197 | 0.162481 |
| N  | 2.777975 | 1.289903 | -1.82487 |
| H  | 1.909941 | 0.914647 | -2.34275 |
| H  | 3.648564 | 0.983855 | -2.28216 |
| H  | 2.683763 | 2.331217 | -1.90751 |
| C  | 1.335989 | 1.426791 | 1.720688 |
| C  | 0.487687 | 2.608757 | 2.203186 |
| C  | 0.810433 | 3.985251 | 1.614454 |
| H  | 0.467454 | 4.755873 | 2.308359 |
| H  | 1.881864 | 4.140295 | 1.454799 |
| N  | 0.116243 | 4.260224 | 0.296906 |
| H  | -0.1516  | 5.256552 | 0.252759 |
| H  | 0.779443 | 4.131737 | -0.50896 |
| H  | -0.39743 | -2.20601 | 10.73787 |
| H  | -5.04125 | 1.940595 | 7.156819 |
| H  | -7.73341 | 6.031383 | 2.570111 |
| H  | -6.39409 | 5.424396 | 3.556366 |
| H  | -7.71698 | 0.585984 | 2.751124 |
| H  | -6.38663 | -2.24898 | -6.59187 |
| H  | 4.731482 | 0.580875 | 7.857993 |
| H  | 4.024594 | 5.389881 | -5.54329 |
| H  | 3.599253 | 10.16214 | -3.67886 |
| H  | 7.933124 | 7.194825 | 0.386323 |
| H  | 7.51729  | -4.76114 | -3.72694 |
| H  | 8.901156 | -5.59843 | -3.0117  |
| H  | 5.810534 | -8.75852 | -1.29472 |
| H  | 3.333529 | -7.75781 | -5.43637 |
| H  | -0.84941 | -5.22687 | -5.13695 |

|   |          |          |          |
|---|----------|----------|----------|
| H | 2.593719 | 0.32611  | -6.98231 |
| H | 1.794789 | 0.415175 | -5.39552 |
| H | 2.37816  | -1.71545 | 4.772384 |
| H | 1.291723 | -2.70757 | 4.052319 |
| O | 0.554169 | 0.63241  | -3.12121 |
| H | -0.12169 | 1.321972 | -3.00192 |
| H | 0.063411 | -0.17525 | -2.71398 |
| O | 1.545514 | -5.62713 | 2.451656 |
| H | 0.922631 | -5.0959  | 3.002789 |
| H | 1.022224 | -5.81129 | 1.644068 |
| O | -1.99852 | 2.519664 | 0.128816 |
| H | -2.86578 | 2.997128 | 0.253832 |
| H | -2.10177 | 1.861383 | -0.59832 |
| H | 1.402614 | -0.48561 | 2.073079 |
| H | 2.366275 | 1.591653 | 2.075391 |
| H | -0.56286 | 2.399345 | 2.005758 |
| H | 0.611355 | 2.665655 | 3.289386 |

<sup>5</sup>TS1<sub>A,C5</sub>

|   |          |          |          |
|---|----------|----------|----------|
| C | -2.11915 | 1.28553  | -5.27841 |
| H | -3.09666 | 0.787304 | -5.3345  |
| C | -2.27008 | 2.731913 | -4.79433 |
| H | -1.29606 | 3.233877 | -4.80571 |
| H | -2.91153 | 3.297491 | -5.48161 |
| C | -2.85535 | 2.811422 | -3.38051 |
| H | -3.78959 | 2.237923 | -3.31949 |
| H | -2.16165 | 2.349665 | -2.66367 |
| C | -3.1303  | 4.238017 | -2.91638 |
| O | -2.71539 | 5.224139 | -3.54469 |
| N | -3.86145 | 4.363164 | -1.78573 |
| H | -4.15253 | 3.548394 | -1.24851 |
| H | -4.05759 | 5.298165 | -1.43832 |
| C | -8.26427 | 6.688214 | -1.27348 |
| H | -9.10684 | 6.102018 | -1.65963 |
| C | -7.5573  | 5.971318 | -0.11952 |
| H | -7.1636  | 5.009    | -0.47437 |
| H | -6.67585 | 6.554227 | 0.172611 |
| C | -8.4323  | 5.722573 | 1.076114 |
| N | -7.96481 | 5.044532 | 2.196019 |
| C | -8.97597 | 4.978232 | 3.040729 |
| H | -8.95972 | 4.505635 | 4.013446 |
| N | -10.0798 | 5.584398 | 2.532707 |
| H | -10.9812 | 5.658068 | 2.98112  |
| C | -9.74823 | 6.062787 | 1.276986 |
| H | -10.4633 | 6.580895 | 0.657763 |
| C | 6.443876 | -4.25762 | 4.082069 |
| C | 6.876139 | -2.80096 | 4.264867 |
| C | 5.537208 | -4.57427 | 2.880796 |
| O | 7.039161 | -2.31767 | 5.38057  |
| C | 4.284713 | -3.74851 | 2.854421 |
| C | 3.597012 | -3.08359 | 3.843942 |
| N | 3.571953 | -3.53341 | 1.69378  |
| C | 2.50046  | -2.7796  | 1.997338 |
| N | 2.477682 | -2.48269 | 3.298817 |
| H | 7.356158 | -4.8657  | 4.015236 |
| H | 6.077268 | -4.44762 | 1.932794 |
| H | 5.287786 | -5.64382 | 2.912864 |
| H | 3.818893 | -3.00994 | 4.896879 |
| H | 1.78604  | -2.43494 | 1.265403 |
| H | 3.774742 | -3.98072 | 0.750671 |
| N | 7.10775  | -2.09017 | 3.115409 |
| H | 6.931036 | -2.52512 | 2.220742 |
| C | 7.624625 | -0.73594 | 3.1179   |
| H | 7.88672  | -0.50195 | 4.154404 |

|   |          |          |          |
|---|----------|----------|----------|
| C | 6.675383 | 0.355952 | 2.601964 |
| O | 7.153914 | 1.394519 | 2.142948 |
| N | 5.349974 | 0.106811 | 2.71015  |
| C | 4.290455 | 1.084751 | 2.418433 |
| C | 4.594088 | 1.871331 | 1.120917 |
| C | 4.00579  | 2.031009 | 3.597687 |
| O | 4.647058 | 3.093614 | 1.089599 |
| C | 2.593    | 2.630224 | 3.559844 |
| C | 1.424609 | 1.64755  | 3.740045 |
| O | 0.258383 | 2.047698 | 3.646635 |
| O | 1.774074 | 0.421236 | 4.003312 |
| H | 5.062698 | -0.76817 | 3.133794 |
| H | 3.395241 | 0.48314  | 2.233844 |
| H | 4.148655 | 1.46692  | 4.525362 |
| H | 4.741586 | 2.840366 | 3.577381 |
| H | 2.441301 | 3.167779 | 2.617189 |
| H | 2.488176 | 3.389698 | 4.346144 |
| N | 4.79676  | 1.071862 | 0.030301 |
| H | 4.373682 | 0.151    | 0.062843 |
| C | 4.818277 | 1.603761 | -1.33289 |
| H | 4.949189 | 0.719408 | -1.96761 |
| C | 3.484631 | 2.245569 | -1.74246 |
| H | 3.235795 | 3.064932 | -1.06064 |
| H | 3.576197 | 2.681116 | -2.74227 |
| C | 2.332169 | 1.220389 | -1.74331 |
| O | 1.193263 | 1.647034 | -2.06913 |
| O | 2.634997 | 0.028832 | -1.41573 |
| C | 6.044426 | 2.466912 | -1.64377 |
| O | 6.125    | 3.05559  | -2.72935 |
| N | 7.083489 | 2.434424 | -0.76678 |
| H | 6.943225 | 2.055349 | 0.167241 |
| C | 8.274929 | 3.243266 | -1.0069  |
| H | 7.958665 | 4.212566 | -1.40796 |
| C | 9.055039 | 3.459465 | 0.293853 |
| H | 9.332203 | 2.504501 | 0.752633 |
| H | 8.445659 | 4.011478 | 1.015526 |
| H | 9.96264  | 4.027513 | 0.074612 |
| C | 9.199596 | 2.672162 | -2.10353 |
| O | 10.12033 | 3.348587 | -2.54999 |
| N | 8.915953 | 1.405153 | -2.52275 |
| H | 8.151974 | 0.92241  | -2.06803 |
| C | 9.552994 | 0.784266 | -3.6673  |
| H | 10.41223 | 1.420689 | -3.90628 |
| C | 10.07817 | -0.63705 | -3.34531 |
| H | 10.90088 | -0.53294 | -2.62896 |
| H | 10.48802 | -1.0359  | -4.27755 |
| C | 9.032292 | -1.58141 | -2.78471 |

|   |          |          |          |
|---|----------|----------|----------|
| C | 8.947139 | -1.82435 | -1.40601 |
| H | 9.661626 | -1.34798 | -0.73751 |
| C | 7.967082 | -2.67423 | -0.8851  |
| H | 7.94187  | -2.8637  | 0.187079 |
| C | 7.040362 | -3.29189 | -1.72694 |
| H | 6.259392 | -3.93535 | -1.32783 |
| C | 7.124965 | -3.06203 | -3.10357 |
| H | 6.415382 | -3.54057 | -3.77369 |
| C | 8.111151 | -2.22515 | -3.62821 |
| H | 8.173082 | -2.05741 | -4.69949 |
| C | 8.67285  | 0.773811 | -4.94581 |
| O | 9.015903 | 0.084548 | -5.91108 |
| N | 7.582495 | 1.573046 | -4.9309  |
| H | 7.352785 | 2.111625 | -4.09894 |
| C | 6.694875 | 1.730084 | -6.0776  |
| H | 7.191549 | 1.262674 | -6.93013 |
| C | 5.291208 | 1.145775 | -5.84503 |
| H | 4.863667 | 1.635953 | -4.96027 |
| H | 4.659928 | 1.439875 | -6.69769 |
| C | 5.217689 | -0.38311 | -5.66819 |
| H | 5.881513 | -0.65603 | -4.83593 |
| C | 3.792023 | -0.81061 | -5.2848  |
| H | 3.727519 | -1.89967 | -5.16923 |
| H | 3.469642 | -0.36093 | -4.33856 |
| H | 3.070085 | -0.51751 | -6.05918 |
| C | 5.701053 | -1.13643 | -6.91805 |
| H | 6.754476 | -0.93004 | -7.13374 |
| H | 5.596455 | -2.2204  | -6.78188 |
| H | 5.105401 | -0.85809 | -7.79896 |
| C | -4.48055 | -4.77214 | -4.99517 |
| H | -3.58304 | -5.29799 | -5.33695 |
| C | -4.11677 | -3.78235 | -3.87686 |
| H | -3.50267 | -2.97187 | -4.28623 |
| H | -5.02926 | -3.31144 | -3.49175 |
| C | -3.36264 | -4.38932 | -2.6883  |
| O | -3.32664 | -5.64284 | -2.56579 |
| O | -2.82738 | -3.56301 | -1.8795  |
| C | -5.57086 | -5.76083 | -4.59557 |
| O | -6.74397 | -5.41846 | -4.43464 |
| N | -5.16484 | -7.05994 | -4.45674 |
| H | -4.17436 | -7.19407 | -4.29771 |
| C | -6.08008 | -8.08267 | -3.98631 |
| H | -7.0166  | -7.99553 | -4.54224 |
| C | -6.46712 | -8.0567  | -2.49635 |
| O | -7.33071 | -8.8232  | -2.08522 |
| N | -5.81851 | -7.14632 | -1.71971 |
| H | -5.06367 | -6.58795 | -2.11571 |

|   |          |          |          |
|---|----------|----------|----------|
| C | -6.13251 | -6.99425 | -0.30648 |
| H | -6.4128  | -7.97781 | 0.082965 |
| C | -4.91041 | -6.48356 | 0.476933 |
| H | -5.24285 | -6.30371 | 1.502381 |
| H | -4.56293 | -5.53413 | 0.053134 |
| C | -3.78809 | -7.52121 | 0.520891 |
| O | -3.87946 | -8.54346 | 1.187684 |
| N | -2.67082 | -7.2009  | -0.21209 |
| H | -2.76494 | -6.56816 | -1.01513 |
| H | -2.003   | -7.95758 | -0.30593 |
| C | -7.3465  | -6.08137 | -0.01386 |
| O | -7.74242 | -5.95723 | 1.143379 |
| N | -7.91997 | -5.44554 | -1.06809 |
| H | -7.5829  | -5.62821 | -2.00653 |
| C | -9.1566  | -4.69789 | -0.8873  |
| H | -9.09125 | -4.19185 | 0.080319 |
| C | -9.42473 | -3.69834 | -2.02151 |
| H | -9.46487 | -4.23857 | -2.97598 |
| H | -10.4364 | -3.29941 | -1.85675 |
| C | -8.43277 | -2.55705 | -2.13706 |
| C | -7.73325 | -2.33773 | -3.33122 |
| H | -7.87377 | -3.02014 | -4.16456 |
| C | -6.81998 | -1.29195 | -3.45626 |
| H | -6.27662 | -1.12917 | -4.38267 |
| C | -6.571   | -0.44555 | -2.37125 |
| O | -5.61339 | 0.520163 | -2.52023 |
| H | -5.43497 | 0.993446 | -1.65644 |
| C | -7.27623 | -0.63387 | -1.17452 |
| H | -7.09373 | 0.031058 | -0.33414 |
| C | -8.19752 | -1.67692 | -1.07178 |
| H | -8.73195 | -1.81087 | -0.13359 |
| C | 4.324601 | -7.08445 | -2.30433 |
| H | 5.140203 | -6.41968 | -2.60495 |
| C | 3.01332  | -6.31335 | -2.16039 |
| H | 2.718249 | -5.86287 | -3.11801 |
| H | 2.188209 | -6.98664 | -1.8921  |
| C | 3.031971 | -5.18463 | -1.12098 |
| O | 1.935154 | -4.57863 | -0.90842 |
| O | 4.120942 | -4.91584 | -0.54076 |
| C | 3.267087 | -3.21349 | 9.184155 |
| C | 2.87703  | -2.3996  | 7.994565 |
| C | 1.981522 | -2.62002 | 6.978641 |
| N | 3.426096 | -1.15638 | 7.71285  |
| C | 2.864258 | -0.68799 | 6.569352 |
| N | 1.986123 | -1.55326 | 6.100659 |
| H | 3.045247 | -2.697   | 10.12718 |
| H | 2.711372 | -4.15513 | 9.183657 |

|   |          |          |          |
|---|----------|----------|----------|
| H | 1.324609 | -3.46093 | 6.81597  |
| H | 3.104983 | 0.259019 | 6.113186 |
| H | 4.149978 | -0.69266 | 8.243144 |
| C | -3.97834 | 9.29762  | 0.63675  |
| H | -3.41661 | 10.23779 | 0.584991 |
| C | -3.54035 | 8.502097 | 1.888738 |
| H | -2.48646 | 8.209742 | 1.786891 |
| H | -3.59228 | 9.177984 | 2.753642 |
| C | -4.40273 | 7.259677 | 2.127601 |
| H | -5.45985 | 7.558136 | 2.188298 |
| H | -4.32175 | 6.614274 | 1.250051 |
| C | -4.05819 | 6.425193 | 3.368614 |
| H | -2.99014 | 6.204425 | 3.4347   |
| H | -4.32705 | 6.943775 | 4.295667 |
| N | -4.80476 | 5.154726 | 3.342902 |
| H | -5.81322 | 5.285029 | 3.363976 |
| C | -4.44466 | 4.177698 | 2.454677 |
| N | -3.17601 | 3.977888 | 2.134815 |
| H | -2.39086 | 4.310015 | 2.725142 |
| H | -2.96368 | 3.172551 | 1.526077 |
| N | -5.42054 | 3.42927  | 1.916622 |
| H | -6.37203 | 3.79577  | 1.959977 |
| H | -5.18969 | 2.749909 | 1.186975 |
| C | -3.83185 | 8.515148 | -0.66982 |
| O | -4.49867 | 7.496899 | -0.8975  |
| N | -2.94589 | 9.035708 | -1.55414 |
| H | -2.28709 | 9.740698 | -1.2408  |
| C | -2.51624 | 8.345279 | -2.76036 |
| H | -3.01929 | 7.380702 | -2.83587 |
| C | -0.98886 | 8.20485  | -2.69485 |
| O | -0.31579 | 9.107638 | -2.18701 |
| N | -0.49205 | 7.062829 | -3.2171  |
| H | -1.15861 | 6.332841 | -3.47515 |
| C | 0.920841 | 6.712947 | -3.10145 |
| H | 1.458079 | 7.643977 | -2.90471 |
| C | 1.201549 | 5.681457 | -1.99126 |
| H | 0.746516 | 4.718643 | -2.25339 |
| H | 2.283553 | 5.507327 | -1.94932 |
| C | 0.703434 | 6.145703 | -0.61867 |
| H | 1.19425  | 7.080548 | -0.32744 |
| H | -0.3739  | 6.339302 | -0.64526 |
| S | 1.034106 | 4.968234 | 0.748614 |
| C | -0.06484 | 3.576873 | 0.285378 |
| H | -0.11743 | 2.912973 | 1.151513 |
| H | -1.07088 | 3.946065 | 0.065512 |
| H | 0.332417 | 3.018714 | -0.56524 |
| O | -0.75781 | -0.6187  | 5.400754 |

|    |          |          |          |
|----|----------|----------|----------|
| C  | -1.14956 | -1.80934 | 5.622082 |
| O  | -0.46542 | -2.78658 | 5.180965 |
| C  | -2.42023 | -2.07078 | 6.410786 |
| C  | -3.26028 | -0.82343 | 6.691385 |
| H  | -2.99495 | -2.82044 | 5.852646 |
| H  | -2.12055 | -2.56722 | 7.344827 |
| H  | -3.54464 | -0.32628 | 5.759487 |
| H  | -4.17073 | -1.09351 | 7.23922  |
| O  | -0.03405 | -1.48503 | 2.673974 |
| O  | -2.63925 | 0.877073 | 3.68522  |
| Fe | 0.859762 | -1.30266 | 4.166209 |
| C  | -2.52205 | -1.13361 | 0.891441 |
| H  | -2.48495 | -0.55682 | 1.816652 |
| H  | -1.52153 | -1.04795 | 0.453326 |
| C  | -3.52833 | -0.47722 | -0.05257 |
| H  | -4.53803 | -0.8724  | 0.103083 |
| C  | -3.59756 | 1.067417 | 0.128798 |
| O  | -4.63251 | 1.663462 | -0.34569 |
| O  | -2.66853 | 1.62493  | 0.739174 |
| H  | -0.17771 | -2.99101 | -0.27856 |
| N  | -3.17796 | -0.78105 | -1.48969 |
| H  | -2.19973 | -0.42743 | -1.75826 |
| H  | -3.87779 | -0.35851 | -2.12019 |
| H  | -3.15588 | -1.81427 | -1.66958 |
| C  | -2.85106 | -2.59527 | 1.268203 |
| H  | -3.14188 | -3.17101 | 0.381112 |
| H  | -3.72068 | -2.58847 | 1.936134 |
| C  | -1.67579 | -3.28327 | 1.974115 |
| H  | -1.91952 | -3.67685 | 2.965151 |
| H  | -0.86854 | -2.40759 | 2.296645 |
| C  | -0.91412 | -4.34232 | 1.196996 |
| H  | 0.03899  | -4.56805 | 1.683399 |
| H  | -1.4931  | -5.27228 | 1.134696 |
| N  | -0.60669 | -3.9408  | -0.21057 |
| H  | 0.148323 | -4.53689 | -0.61041 |
| H  | -1.45281 | -3.9503  | -0.83054 |
| H  | 4.337202 | -3.45767 | 9.181147 |
| H  | 5.953519 | -4.54072 | 5.017943 |
| H  | 4.232289 | -7.87802 | -3.05594 |
| H  | 4.616094 | -7.5434  | -1.3539  |
| H  | 8.534209 | -0.66322 | 2.513548 |
| H  | 6.602149 | 2.802587 | -6.29127 |
| H  | -2.69884 | -0.10064 | 7.291562 |
| H  | -4.8781  | -4.20648 | -5.84553 |
| H  | -5.65701 | -9.06766 | -4.20608 |
| H  | -10.0068 | -5.39304 | -0.81739 |
| H  | -7.5601  | 6.855024 | -2.09348 |



|   |          |          |          |
|---|----------|----------|----------|
| H | -8.64696 | 7.667252 | -0.9595  |
| H | -5.03943 | 9.561229 | 0.73344  |
| H | -2.7761  | 8.94049  | -3.64684 |
| H | 1.267107 | 6.31689  | -4.06339 |
| H | -1.67394 | 1.253019 | -6.28011 |
| H | -1.48369 | 0.702067 | -4.60253 |
| H | -1.84521 | 0.641503 | 4.198448 |
| H | -2.27535 | 1.217852 | 2.852095 |
| O | -0.71743 | -0.23525 | -2.39309 |
| H | -0.17917 | -1.02834 | -2.17624 |
| H | -0.07229 | 0.517326 | -2.23687 |
| O | -0.83942 | 4.668548 | 3.517779 |
| H | -0.45795 | 3.771591 | 3.669455 |
| H | -0.2772  | 5.039181 | 2.807456 |
| O | 1.005263 | -1.97676 | -1.10676 |
| H | 1.580012 | -2.75544 | -1.27515 |
| H | 1.599841 | -1.15792 | -1.16272 |

<sup>5</sup>IM1<sub>A,C5</sub>

|   |          |          |          |
|---|----------|----------|----------|
| C | -1.9963  | 1.931576 | -4.73679 |
| H | -2.97716 | 1.830816 | -4.25501 |
| C | -1.43551 | 3.342892 | -4.53734 |
| H | -0.51689 | 3.480268 | -5.11806 |
| H | -2.15496 | 4.081939 | -4.9171  |
| C | -1.11897 | 3.656735 | -3.06169 |
| H | -1.98646 | 3.437321 | -2.42623 |
| H | -0.29807 | 3.010815 | -2.72322 |
| C | -0.67955 | 5.104038 | -2.90047 |
| O | 0.249198 | 5.576519 | -3.57103 |
| N | -1.38003 | 5.860798 | -2.02157 |
| H | -2.09923 | 5.458183 | -1.43695 |
| H | -1.14837 | 6.847445 | -1.90417 |
| C | -4.7818  | 9.034853 | -2.39561 |
| H | -5.71053 | 8.677892 | -2.85656 |
| C | -4.405   | 8.199845 | -1.16814 |
| H | -4.24543 | 7.156205 | -1.47147 |
| H | -3.43555 | 8.543741 | -0.78553 |
| C | -5.43058 | 8.229506 | -0.07033 |
| N | -5.27733 | 7.487087 | 1.094641 |
| C | -6.34584 | 7.725352 | 1.831762 |
| H | -6.55041 | 7.301053 | 2.80533  |
| N | -7.18815 | 8.588143 | 1.208219 |
| H | -8.07439 | 8.918083 | 1.561472 |
| C | -6.61779 | 8.917993 | -0.0089  |
| H | -7.10007 | 9.590481 | -0.7006  |
| C | 2.31041  | -6.05273 | 4.331443 |
| C | 3.682026 | -5.37708 | 4.275653 |
| C | 1.2603   | -5.63838 | 3.280788 |
| O | 4.33355  | -5.21584 | 5.304273 |
| C | 1.026178 | -4.15582 | 3.188709 |
| C | 0.604927 | -3.22042 | 4.10352  |
| N | 1.248276 | -3.44657 | 2.02006  |
| C | 0.96169  | -2.14734 | 2.248073 |
| N | 0.573666 | -1.97495 | 3.510481 |
| H | 2.472397 | -7.13761 | 4.262735 |
| H | 1.553494 | -6.00051 | 2.29162  |
| H | 0.321948 | -6.15032 | 3.532711 |
| H | 0.322959 | -3.35614 | 5.135658 |
| H | 1.059962 | -1.36603 | 1.507094 |
| H | 1.663475 | -3.8828  | 1.168575 |
| N | 4.144745 | -4.98185 | 3.04806  |
| H | 3.623341 | -5.17397 | 2.192892 |
| C | 5.464676 | -4.39004 | 2.918241 |
| H | 6.072068 | -4.71962 | 3.765744 |

|   |          |          |          |
|---|----------|----------|----------|
| C | 5.540498 | -2.85333 | 2.87416  |
| O | 6.603253 | -2.31411 | 2.559208 |
| N | 4.401516 | -2.18634 | 3.173939 |
| C | 4.233473 | -0.72902 | 3.110786 |
| C | 4.91472  | -0.15971 | 1.847749 |
| C | 4.64892  | 0.001407 | 4.398388 |
| O | 5.603881 | 0.853384 | 1.862763 |
| C | 4.077494 | 1.424344 | 4.509739 |
| C | 2.552414 | 1.574382 | 4.627492 |
| O | 2.05531  | 2.698326 | 4.557651 |
| O | 1.882966 | 0.471406 | 4.846188 |
| H | 3.60115  | -2.7402  | 3.448326 |
| H | 3.157876 | -0.57516 | 2.976778 |
| H | 4.306675 | -0.60442 | 5.244608 |
| H | 5.742033 | 0.048454 | 4.43977  |
| H | 4.400505 | 2.027528 | 3.656485 |
| H | 4.50128  | 1.915536 | 5.396746 |
| N | 4.664149 | -0.88833 | 0.719266 |
| H | 3.836767 | -1.47447 | 0.723329 |
| C | 4.937149 | -0.3681  | -0.61452 |
| H | 4.78604  | -1.22429 | -1.28666 |
| C | 3.947485 | 0.724484 | -1.02884 |
| H | 3.966234 | 1.531941 | -0.28688 |
| H | 4.249414 | 1.16562  | -1.98139 |
| C | 2.510319 | 0.189226 | -1.15978 |
| O | 1.704359 | 0.883024 | -1.83445 |
| O | 2.243966 | -0.91119 | -0.5707  |
| C | 6.411216 | 0.005822 | -0.80936 |
| O | 6.761447 | 0.81505  | -1.67428 |
| N | 7.307965 | -0.74277 | -0.10682 |
| H | 6.975707 | -1.26687 | 0.701129 |
| C | 8.739395 | -0.47249 | -0.20004 |
| H | 8.884534 | 0.613065 | -0.24841 |
| C | 9.470832 | -1.03015 | 1.024556 |
| H | 9.300905 | -2.1077  | 1.128513 |
| H | 9.1104   | -0.54414 | 1.93585  |
| H | 10.54301 | -0.85111 | 0.913398 |
| C | 9.380107 | -1.00044 | -1.50299 |
| O | 10.54605 | -0.73568 | -1.77742 |
| N | 8.560386 | -1.7456  | -2.29732 |
| H | 7.624342 | -1.92346 | -1.95821 |
| C | 8.90744  | -2.18768 | -3.6318  |
| H | 9.998312 | -2.11983 | -3.70252 |
| C | 8.487265 | -3.6611  | -3.86646 |
| H | 9.071821 | -4.28719 | -3.18247 |
| H | 8.776999 | -3.91252 | -4.89009 |
| C | 7.005885 | -3.91352 | -3.66265 |

|   |          |          |          |
|---|----------|----------|----------|
| C | 6.493295 | -4.23094 | -2.39439 |
| H | 7.178382 | -4.34796 | -1.55678 |
| C | 5.120172 | -4.39995 | -2.1913  |
| H | 4.734995 | -4.6273  | -1.20061 |
| C | 4.234341 | -4.27377 | -3.26468 |
| H | 3.167626 | -4.40881 | -3.10687 |
| C | 4.733978 | -3.97702 | -4.53559 |
| H | 4.053211 | -3.88057 | -5.37767 |
| C | 6.103992 | -3.79264 | -4.73177 |
| H | 6.486171 | -3.53923 | -5.71664 |
| C | 8.361774 | -1.27978 | -4.76531 |
| O | 8.500407 | -1.63709 | -5.93872 |
| N | 7.789105 | -0.11604 | -4.38263 |
| H | 7.682959 | 0.096529 | -3.39348 |
| C | 7.322142 | 0.889682 | -5.329   |
| H | 7.617127 | 0.547727 | -6.32284 |
| C | 5.810854 | 1.159697 | -5.24497 |
| H | 5.578231 | 1.488862 | -4.22345 |
| H | 5.591223 | 2.01282  | -5.90598 |
| C | 4.885947 | -0.01476 | -5.61802 |
| H | 5.102444 | -0.84387 | -4.93014 |
| C | 3.414059 | 0.385364 | -5.42569 |
| H | 2.746145 | -0.45192 | -5.66245 |
| H | 3.195968 | 0.696493 | -4.39725 |
| H | 3.145389 | 1.218461 | -6.09019 |
| C | 5.130388 | -0.51975 | -7.04943 |
| H | 6.141628 | -0.92099 | -7.17307 |
| H | 4.421322 | -1.31786 | -7.30359 |
| H | 4.988702 | 0.289228 | -7.78033 |
| C | -5.47447 | -3.38551 | -5.29347 |
| H | -4.76203 | -4.09916 | -5.72    |
| C | -4.84434 | -2.67234 | -4.0857  |
| H | -4.03476 | -2.0161  | -4.42582 |
| H | -5.5882  | -2.01901 | -3.61423 |
| C | -4.27434 | -3.59478 | -3.00277 |
| O | -4.56232 | -4.82178 | -3.03157 |
| O | -3.54314 | -3.04125 | -2.11792 |
| C | -6.79964 | -4.06802 | -4.96991 |
| O | -7.83619 | -3.43336 | -4.76756 |
| N | -6.76504 | -5.43608 | -4.94672 |
| H | -5.84935 | -5.84622 | -4.81103 |
| C | -7.92869 | -6.20438 | -4.54678 |
| H | -8.80623 | -5.79319 | -5.05091 |
| C | -8.27223 | -6.23679 | -3.04647 |
| O | -9.30676 | -6.77779 | -2.67416 |
| N | -7.38335 | -5.62925 | -2.21197 |
| H | -6.50738 | -5.26696 | -2.58507 |

|   |          |          |          |
|---|----------|----------|----------|
| C | -7.59864 | -5.58296 | -0.77292 |
| H | -8.15349 | -6.48287 | -0.48933 |
| C | -6.25829 | -5.56906 | -0.01696 |
| H | -6.49182 | -5.43674 | 1.042359 |
| H | -5.6509  | -4.71834 | -0.34762 |
| C | -5.50321 | -6.88915 | -0.17422 |
| O | -5.87981 | -7.91853 | 0.369807 |
| N | -4.36279 | -6.81907 | -0.93883 |
| H | -4.28371 | -6.08296 | -1.64984 |
| H | -3.96212 | -7.72051 | -1.17206 |
| C | -8.46942 | -4.39896 | -0.29084 |
| O | -8.74995 | -4.30081 | 0.902    |
| N | -8.88626 | -3.50783 | -1.22671 |
| H | -8.66712 | -3.67126 | -2.20226 |
| C | -9.83609 | -2.46288 | -0.8693  |
| H | -9.54724 | -2.08091 | 0.114431 |
| C | -9.89877 | -1.33191 | -1.90527 |
| H | -10.1646 | -1.75202 | -2.88375 |
| H | -10.7394 | -0.68517 | -1.61502 |
| C | -8.63526 | -0.50456 | -2.04373 |
| C | -7.97399 | -0.40789 | -3.27543 |
| H | -8.3473  | -0.96638 | -4.12889 |
| C | -6.81098 | 0.347486 | -3.41707 |
| H | -6.29824 | 0.414089 | -4.37217 |
| C | -6.26913 | 1.013865 | -2.31394 |
| O | -5.08712 | 1.681176 | -2.49028 |
| H | -4.7377  | 2.027509 | -1.62482 |
| C | -6.92811 | 0.950347 | -1.07809 |
| H | -6.52107 | 1.484502 | -0.22318 |
| C | -8.09909 | 0.200538 | -0.95748 |
| H | -8.59526 | 0.159695 | 0.010061 |
| C | 3.331464 | -7.87154 | 0.068452 |
| H | 4.185548 | -7.28429 | 0.418287 |
| C | 2.558572 | -7.12358 | -1.01822 |
| H | 3.2045   | -6.96356 | -1.89295 |
| H | 1.709646 | -7.71385 | -1.38193 |
| C | 2.024369 | -5.73963 | -0.62109 |
| O | 1.094516 | -5.26637 | -1.33515 |
| O | 2.563618 | -5.14401 | 0.366548 |
| C | -0.81001 | -3.09253 | 9.43263  |
| C | -0.2599  | -2.23905 | 8.337636 |
| C | -0.75058 | -1.88724 | 7.10534  |
| N | 0.971028 | -1.60355 | 8.414694 |
| C | 1.172034 | -0.91568 | 7.259779 |
| N | 0.146103 | -1.06677 | 6.445972 |
| H | -0.95074 | -2.52795 | 10.36371 |
| H | -1.78472 | -3.48974 | 9.136351 |

|   |          |          |          |
|---|----------|----------|----------|
| H | -1.68462 | -2.16769 | 6.642078 |
| H | 2.05229  | -0.33364 | 7.037331 |
| H | 1.618704 | -1.65336 | 9.187988 |
| C | 0.261875 | 10.02125 | 0.26595  |
| H | 1.159591 | 10.63966 | 0.384194 |
| C | 0.141123 | 9.047807 | 1.464958 |
| H | 1.04628  | 8.430299 | 1.533616 |
| H | 0.108281 | 9.651582 | 2.382304 |
| C | -1.09688 | 8.150613 | 1.375606 |
| H | -1.97371 | 8.771657 | 1.145271 |
| H | -0.98346 | 7.467616 | 0.529566 |
| C | -1.41628 | 7.311543 | 2.620103 |
| H | -0.57633 | 6.688622 | 2.936474 |
| H | -1.67141 | 7.94982  | 3.474217 |
| N | -2.58263 | 6.462637 | 2.341378 |
| H | -3.42734 | 6.977735 | 2.091625 |
| C | -2.50359 | 5.269399 | 1.705833 |
| N | -1.41805 | 4.501274 | 1.757437 |
| H | -0.66069 | 4.662921 | 2.446832 |
| H | -1.5477  | 3.530345 | 1.466915 |
| N | -3.5531  | 4.89373  | 0.950542 |
| H | -4.36452 | 5.503504 | 0.938262 |
| H | -3.63095 | 3.935302 | 0.586034 |
| C | 0.268119 | 9.307499 | -1.0845  |
| O | -0.76146 | 8.79097  | -1.54351 |
| N | 1.458305 | 9.276181 | -1.72562 |
| H | 2.300544 | 9.586382 | -1.25211 |
| C | 1.724195 | 8.458175 | -2.90027 |
| H | 0.871039 | 7.810411 | -3.10344 |
| C | 3.008024 | 7.6673   | -2.61633 |
| O | 3.934219 | 8.216146 | -2.01113 |
| N | 3.014618 | 6.393507 | -3.06331 |
| H | 2.131395 | 6.002514 | -3.39388 |
| C | 4.107917 | 5.476039 | -2.75179 |
| H | 4.969403 | 6.09449  | -2.48867 |
| C | 3.772859 | 4.498036 | -1.6096  |
| H | 2.970631 | 3.822468 | -1.93087 |
| H | 4.653916 | 3.87078  | -1.42872 |
| C | 3.372058 | 5.214264 | -0.31549 |
| H | 4.178024 | 5.874841 | 0.022026 |
| H | 2.488927 | 5.84074  | -0.48135 |
| S | 3.032745 | 4.103683 | 1.10706  |
| C | 1.502768 | 3.26975  | 0.545999 |
| H | 1.170476 | 2.63477  | 1.373221 |
| H | 0.726712 | 4.008509 | 0.323205 |
| H | 1.677468 | 2.63905  | -0.32738 |
| O | -1.47081 | 1.155432 | 5.287826 |

|    |          |          |          |
|----|----------|----------|----------|
| C  | -2.35329 | 0.241872 | 5.13465  |
| O  | -2.04023 | -0.82161 | 4.518533 |
| C  | -3.74955 | 0.441861 | 5.687397 |
| C  | -3.74582 | 0.927694 | 7.143723 |
| H  | -4.22091 | 1.203365 | 5.053558 |
| H  | -4.30281 | -0.49585 | 5.57593  |
| H  | -3.20189 | 1.87244  | 7.229266 |
| H  | -4.77059 | 1.083826 | 7.498675 |
| O  | -0.02361 | 0.745359 | 2.703069 |
| O  | -3.25155 | 3.037321 | 3.861186 |
| Fe | 0.056632 | -0.04415 | 4.33781  |
| C  | -2.56388 | -1.07981 | 0.902541 |
| H  | -2.36406 | -0.65631 | 1.887594 |
| H  | -1.58755 | -1.22782 | 0.426588 |
| C  | -3.36748 | -0.0723  | 0.076988 |
| H  | -4.44226 | -0.2296  | 0.234324 |
| C  | -3.11239 | 1.425309 | 0.419984 |
| O  | -3.7475  | 2.281167 | -0.26983 |
| O  | -2.35544 | 1.707849 | 1.381461 |
| H  | -0.8573  | -3.48421 | -0.60954 |
| N  | -3.12951 | -0.30016 | -1.39391 |
| H  | -2.09289 | -0.19214 | -1.67431 |
| H  | -3.6888  | 0.355764 | -1.96039 |
| H  | -3.38669 | -1.27463 | -1.68034 |
| C  | -3.30394 | -2.43433 | 1.090232 |
| H  | -4.12327 | -2.26495 | 1.805633 |
| C  | -2.39814 | -3.50673 | 1.604251 |
| C  | -1.98602 | -4.68037 | 0.780675 |
| H  | -1.14309 | -5.20159 | 1.239852 |
| H  | -2.79602 | -5.40922 | 0.632026 |
| N  | -1.54673 | -4.28223 | -0.60875 |
| H  | -1.01154 | -5.0372  | -1.06061 |
| H  | -2.35468 | -3.98336 | -1.21078 |
| H  | -0.15732 | -3.94632 | 9.656919 |
| H  | 1.939678 | -5.86203 | 5.342928 |
| H  | 3.707162 | -8.82973 | -0.30955 |
| H  | 2.69729  | -8.08315 | 0.938038 |
| H  | 5.940255 | -4.74494 | 1.999355 |
| H  | 7.85904  | 1.82693  | -5.12874 |
| H  | -3.26287 | 0.200166 | 7.806878 |
| H  | -5.6971  | -2.63692 | -6.06201 |
| H  | -7.80862 | -7.23869 | -4.88376 |
| H  | -10.8402 | -2.89673 | -0.75116 |
| H  | -3.98717 | 8.978552 | -3.14509 |
| H  | -4.91646 | 10.09107 | -2.13255 |
| H  | -0.60403 | 10.69386 | 0.263674 |
| H  | 1.892355 | 9.096837 | -3.77854 |

|   |          |          |          |
|---|----------|----------|----------|
| H | 4.359303 | 4.908101 | -3.65507 |
| H | -2.12873 | 1.715841 | -5.80426 |
| H | -1.3334  | 1.169003 | -4.3127  |
| H | -2.51789 | 2.747838 | 4.434419 |
| H | -3.05673 | 2.57744  | 3.024381 |
| O | -0.64868 | -0.30258 | -2.35431 |
| H | -0.34933 | -1.23601 | -2.28695 |
| H | 0.174916 | 0.215642 | -2.10527 |
| O | 0.79609  | 4.898806 | 3.439761 |
| H | 1.021117 | 4.105338 | 3.974189 |
| H | 1.556882 | 4.95333  | 2.825336 |
| O | 0.410836 | -2.61082 | -1.30339 |
| H | 0.893262 | -3.46153 | -1.45168 |
| H | 1.088505 | -1.93391 | -0.98719 |
| H | -0.86089 | 0.968965 | 2.247393 |
| H | -3.76741 | -2.74775 | 0.148718 |
| H | -1.97595 | -3.4031  | 2.599268 |



<sup>5</sup>TS2<sub>A,C5</sub>

|   |          |          |          |
|---|----------|----------|----------|
| C | 2.286915 | -1.85574 | -5.79517 |
| H | 3.059044 | -1.07768 | -5.86462 |
| C | 2.84814  | -3.12474 | -5.1437  |
| H | 2.090209 | -3.9157  | -5.13946 |
| H | 3.687458 | -3.512   | -5.73599 |
| C | 3.317503 | -2.87692 | -3.70625 |
| H | 4.021855 | -2.0368  | -3.67194 |
| H | 2.463861 | -2.59017 | -3.07643 |
| C | 3.962578 | -4.09646 | -3.06038 |
| O | 3.74235  | -5.24678 | -3.4703  |
| N | 4.793814 | -3.84523 | -2.02393 |
| H | 4.859278 | -2.90863 | -1.62978 |
| H | 5.183492 | -4.6357  | -1.51676 |
| C | 9.435595 | -4.7033  | -1.37548 |
| H | 10.07125 | -3.96713 | -1.88233 |
| C | 8.582501 | -4.05692 | -0.28009 |
| H | 7.924154 | -3.30065 | -0.72895 |
| H | 7.910805 | -4.81641 | 0.137389 |
| C | 9.379367 | -3.41144 | 0.817767 |
| N | 8.76674  | -2.71654 | 1.854747 |
| C | 9.737602 | -2.26548 | 2.625541 |
| H | 9.61233  | -1.67412 | 3.522447 |
| N | 10.95445 | -2.63418 | 2.148619 |
| H | 11.84995 | -2.40709 | 2.555269 |
| C | 10.74146 | -3.3651  | 0.992763 |
| H | 11.55828 | -3.76804 | 0.415075 |
| C | -6.16831 | 3.687588 | 4.960277 |
| C | -6.57231 | 2.244547 | 4.646505 |
| C | -5.06723 | 4.345801 | 4.099004 |
| O | -6.94017 | 1.496163 | 5.546019 |
| C | -3.82171 | 3.519573 | 3.961235 |
| C | -2.78847 | 3.194747 | 4.811804 |
| N | -3.55486 | 2.831879 | 2.792248 |
| C | -2.40949 | 2.139232 | 2.958454 |
| N | -1.91622 | 2.339212 | 4.175174 |
| H | -7.07811 | 4.302662 | 4.906948 |
| H | -5.44678 | 4.565952 | 3.095004 |
| H | -4.82514 | 5.314071 | 4.553882 |
| H | -2.61111 | 3.51962  | 5.826902 |
| H | -1.95807 | 1.512909 | 2.20357  |
| H | -4.14742 | 2.883395 | 1.934865 |
| N | -6.53614 | 1.84084  | 3.334953 |
| H | -6.31022 | 2.492531 | 2.589228 |
| C | -7.04054 | 0.53232  | 2.9614   |
| H | -7.74848 | 0.204298 | 3.726414 |
| C | -6.03206 | -0.61632 | 2.788901 |

|   |          |          |          |
|---|----------|----------|----------|
| O | -6.47253 | -1.72849 | 2.485274 |
| N | -4.72184 | -0.33108 | 2.939136 |
| C | -3.61834 | -1.30085 | 2.821522 |
| C | -3.85434 | -2.26993 | 1.632132 |
| C | -3.33522 | -2.05012 | 4.136278 |
| O | -3.82652 | -3.48721 | 1.760609 |
| C | -1.93819 | -2.69115 | 4.194211 |
| C | -0.74982 | -1.71876 | 4.302005 |
| O | 0.373936 | -2.11501 | 3.900362 |
| O | -0.98122 | -0.58278 | 4.839938 |
| H | -4.48552 | 0.607793 | 3.234161 |
| H | -2.73914 | -0.69746 | 2.567867 |
| H | -3.43547 | -1.33317 | 4.956988 |
| H | -4.09699 | -2.82567 | 4.260735 |
| H | -1.78066 | -3.34902 | 3.335699 |
| H | -1.88681 | -3.33972 | 5.081085 |
| N | -4.08411 | -1.64108 | 0.44062  |
| H | -3.83844 | -0.65648 | 0.385927 |
| C | -4.17242 | -2.35275 | -0.83551 |
| H | -4.35799 | -1.57165 | -1.58252 |
| C | -2.87356 | -3.05726 | -1.24781 |
| H | -2.45403 | -3.60342 | -0.39797 |
| H | -3.10914 | -3.80861 | -2.00797 |
| C | -1.80359 | -2.13459 | -1.84406 |
| O | -0.71366 | -2.68787 | -2.14773 |
| O | -2.08093 | -0.89884 | -2.03672 |
| C | -5.3805  | -3.29984 | -0.95724 |
| O | -5.4505  | -4.07783 | -1.9184  |
| N | -6.40229 | -3.16648 | -0.07446 |
| H | -6.26926 | -2.62111 | 0.777124 |
| C | -7.51899 | -4.11103 | -0.10227 |
| H | -7.11614 | -5.10765 | -0.31717 |
| C | -8.24359 | -4.13852 | 1.247332 |
| H | -8.60406 | -3.14276 | 1.523896 |
| H | -7.5652  | -4.47669 | 2.035788 |
| H | -9.09343 | -4.82192 | 1.177712 |
| C | -8.52345 | -3.86598 | -1.24848 |
| O | -9.42064 | -4.67391 | -1.46768 |
| N | -8.33235 | -2.73032 | -1.97809 |
| H | -7.5713  | -2.12208 | -1.70549 |
| C | -9.05075 | -2.43778 | -3.20221 |
| H | -9.93707 | -3.08099 | -3.19303 |
| C | -9.51253 | -0.95884 | -3.25137 |
| H | -10.2519 | -0.81169 | -2.45581 |
| H | -10.0114 | -0.81578 | -4.21355 |
| C | -8.37433 | 0.028373 | -3.09051 |
| C | -8.0032  | 0.500234 | -1.82193 |

|   |          |          |          |
|---|----------|----------|----------|
| H | -8.58781 | 0.202685 | -0.95338 |
| C | -6.89496 | 1.335558 | -1.65733 |
| H | -6.61888 | 1.691721 | -0.66853 |
| C | -6.14147 | 1.721849 | -2.76874 |
| H | -5.26277 | 2.347371 | -2.63721 |
| C | -6.51946 | 1.285099 | -4.04108 |
| H | -5.9439  | 1.587047 | -4.91247 |
| C | -7.62446 | 0.447278 | -4.20111 |
| H | -7.90158 | 0.089074 | -5.18855 |
| C | -8.2785  | -2.8112  | -4.49623 |
| O | -8.737   | -2.46884 | -5.59061 |
| N | -7.14899 | -3.53444 | -4.33254 |
| H | -6.81284 | -3.7511  | -3.39662 |
| C | -6.35046 | -4.03271 | -5.4458  |
| H | -6.93472 | -3.87028 | -6.35378 |
| C | -4.95993 | -3.38176 | -5.53666 |
| H | -4.44485 | -3.54857 | -4.58154 |
| H | -4.38334 | -3.9249  | -6.30153 |
| C | -4.94354 | -1.87687 | -5.86547 |
| H | -5.55351 | -1.36568 | -5.10881 |
| C | -3.51459 | -1.32082 | -5.76148 |
| H | -3.49143 | -0.25218 | -6.01081 |
| H | -3.10639 | -1.43065 | -4.75032 |
| H | -2.83746 | -1.83542 | -6.45709 |
| C | -5.55594 | -1.57365 | -7.24235 |
| H | -6.61376 | -1.85284 | -7.28484 |
| H | -5.48694 | -0.50183 | -7.46883 |
| H | -5.0222  | -2.11154 | -8.03881 |
| C | 1.644689 | 5.167186 | -5.67215 |
| H | 0.584037 | 5.381573 | -5.83965 |
| C | 1.801336 | 4.101541 | -4.57681 |
| H | 1.419584 | 3.139519 | -4.93686 |
| H | 2.866932 | 3.951515 | -4.362   |
| C | 1.095647 | 4.424243 | -3.25538 |
| O | 0.710779 | 5.602183 | -3.04105 |
| O | 0.962507 | 3.450846 | -2.43815 |
| C | 2.422264 | 6.445548 | -5.38133 |
| O | 3.654271 | 6.474851 | -5.35391 |
| N | 1.66404  | 7.565522 | -5.18171 |
| H | 0.692898 | 7.414065 | -4.94438 |
| C | 2.271683 | 8.833662 | -4.82464 |
| H | 3.113783 | 9.019475 | -5.49595 |
| C | 2.829623 | 8.973932 | -3.39678 |
| O | 3.439746 | 9.990092 | -3.08641 |
| N | 2.621764 | 7.920642 | -2.55949 |
| H | 2.062621 | 7.127499 | -2.86901 |
| C | 3.170503 | 7.907421 | -1.21197 |

|   |          |          |          |
|---|----------|----------|----------|
| H | 3.162981 | 8.934661 | -0.8355  |
| C | 2.31686  | 7.032201 | -0.27907 |
| H | 2.833819 | 6.997439 | 0.683611 |
| H | 2.257319 | 6.013928 | -0.68073 |
| C | 0.926125 | 7.62247  | -0.04857 |
| O | 0.75437  | 8.646159 | 0.59571  |
| N | -0.11262 | 6.887014 | -0.5831  |
| H | 0.076252 | 6.325476 | -1.42308 |
| H | -1.00457 | 7.370336 | -0.56512 |
| C | 4.64599  | 7.449109 | -1.12053 |
| O | 5.218098 | 7.482735 | -0.03281 |
| N | 5.238786 | 7.01437  | -2.26174 |
| H | 4.730269 | 7.055772 | -3.13803 |
| C | 6.666615 | 6.723927 | -2.28133 |
| H | 6.915957 | 6.257513 | -1.32392 |
| C | 7.081601 | 5.832704 | -3.46013 |
| H | 6.777226 | 6.312004 | -4.39923 |
| H | 8.181111 | 5.817627 | -3.47098 |
| C | 6.550936 | 4.412315 | -3.42978 |
| C | 5.771987 | 3.917065 | -4.48414 |
| H | 5.505611 | 4.576667 | -5.30524 |
| C | 5.293409 | 2.60762  | -4.48003 |
| H | 4.693228 | 2.227834 | -5.30224 |
| C | 5.572678 | 1.761558 | -3.40133 |
| O | 5.027413 | 0.50769  | -3.41699 |
| H | 5.150843 | 0.042571 | -2.53985 |
| C | 6.361695 | 2.23291  | -2.34277 |
| H | 6.585745 | 1.574092 | -1.50768 |
| C | 6.843733 | 3.542386 | -2.37026 |
| H | 7.455045 | 3.890737 | -1.54014 |
| C | -6.39336 | 5.848989 | -0.08348 |
| H | -7.18458 | 5.193286 | 0.290363 |
| C | -5.37251 | 5.050934 | -0.89523 |
| H | -5.85749 | 4.61962  | -1.78232 |
| H | -4.56998 | 5.692717 | -1.27684 |
| C | -4.72296 | 3.881327 | -0.14669 |
| O | -3.61577 | 3.450411 | -0.59565 |
| O | -5.33452 | 3.388181 | 0.848603 |
| C | -0.94321 | 3.175859 | 10.17893 |
| C | -0.88605 | 2.365144 | 8.926065 |
| C | -0.35264 | 2.615829 | 7.686727 |
| N | -1.42659 | 1.090275 | 8.821176 |
| C | -1.20593 | 0.633201 | 7.559533 |
| N | -0.5573  | 1.535591 | 6.851832 |
| H | -0.42596 | 2.684156 | 11.01348 |
| H | -0.45917 | 4.142462 | 10.01404 |
| H | 0.168379 | 3.493714 | 7.33238  |

|   |          |          |          |
|---|----------|----------|----------|
| H | -1.52428 | -0.32759 | 7.183776 |
| H | -1.91388 | 0.589772 | 9.550422 |
| C | 6.087232 | -8.09575 | 1.243827 |
| H | 5.789315 | -9.14175 | 1.383151 |
| C | 5.482457 | -7.22998 | 2.374559 |
| H | 4.386261 | -7.25611 | 2.310891 |
| H | 5.748061 | -7.69362 | 3.334752 |
| C | 5.969118 | -5.77935 | 2.326147 |
| H | 7.068746 | -5.76381 | 2.354129 |
| H | 5.686508 | -5.35775 | 1.358843 |
| C | 5.435372 | -4.85068 | 3.425899 |
| H | 4.352474 | -4.92863 | 3.549447 |
| H | 5.877308 | -5.08245 | 4.401508 |
| N | 5.781746 | -3.45199 | 3.114762 |
| H | 6.784641 | -3.28227 | 3.099918 |
| C | 5.151711 | -2.79967 | 2.091503 |
| N | 3.886098 | -3.05084 | 1.794794 |
| H | 3.253807 | -3.51241 | 2.472624 |
| H | 3.438007 | -2.47593 | 1.069935 |
| N | 5.868518 | -1.89515 | 1.40199  |
| H | 6.883754 | -1.96651 | 1.466651 |
| H | 5.473304 | -1.45721 | 0.5655   |
| C | 5.711865 | -7.61531 | -0.15943 |
| O | 6.126634 | -6.53938 | -0.61114 |
| N | 4.917428 | -8.4592  | -0.862   |
| H | 4.456018 | -9.22554 | -0.3833  |
| C | 4.286668 | -8.1056  | -2.12414 |
| H | 4.541383 | -7.08056 | -2.39454 |
| C | 2.774709 | -8.31246 | -1.96132 |
| O | 2.36026  | -9.25523 | -1.2783  |
| N | 1.995537 | -7.41534 | -2.60174 |
| H | 2.453572 | -6.60998 | -3.03145 |
| C | 0.541033 | -7.42337 | -2.46903 |
| H | 0.261437 | -8.43749 | -2.1721  |
| C | 0.003618 | -6.39971 | -1.44899 |
| H | 0.168893 | -5.3794  | -1.81499 |
| H | -1.08418 | -6.5272  | -1.38299 |
| C | 0.62389  | -6.57517 | -0.05886 |
| H | 0.449356 | -7.58945 | 0.315602 |
| H | 1.708446 | -6.42985 | -0.10139 |
| S | -0.05331 | -5.45397 | 1.226527 |
| C | 0.567189 | -3.83654 | 0.626375 |
| H | 0.393801 | -3.11319 | 1.427414 |
| H | 1.640928 | -3.89574 | 0.43036  |
| H | 0.054462 | -3.51469 | -0.28109 |
| O | 2.01892  | 1.301373 | 5.216539 |
| C | 2.192803 | 2.566449 | 5.099637 |

|    |          |          |          |
|----|----------|----------|----------|
| O  | 1.235975 | 3.335979 | 4.822168 |
| C  | 3.601513 | 3.124733 | 5.273705 |
| C  | 4.417667 | 2.418498 | 6.360975 |
| H  | 4.111579 | 3.016741 | 4.304881 |
| H  | 3.519176 | 4.199426 | 5.464876 |
| H  | 4.48832  | 1.347174 | 6.154573 |
| H  | 5.430745 | 2.833253 | 6.418804 |
| O  | 0.243955 | 1.126277 | 2.749662 |
| O  | 2.506657 | -0.49281 | 3.125912 |
| Fe | -0.08103 | 1.303619 | 4.69322  |
| C  | 2.074406 | 1.275912 | 0.201848 |
| H  | 2.381963 | 0.766415 | 1.117007 |
| H  | 1.065731 | 0.914316 | -0.01505 |
| C  | 3.032921 | 0.886367 | -0.92745 |
| H  | 3.89597  | 1.558304 | -0.94753 |
| C  | 3.552924 | -0.5705  | -0.74762 |
| O  | 4.772166 | -0.78742 | -1.09625 |
| O  | 2.769425 | -1.39871 | -0.26173 |
| H  | -1.13331 | 2.219286 | -0.19284 |
| N  | 2.375085 | 1.004247 | -2.27452 |
| H  | 1.56309  | 0.303067 | -2.44638 |
| H  | 3.088533 | 0.834226 | -3.00036 |
| H  | 1.954935 | 1.950333 | -2.42454 |
| C  | 2.086175 | 2.817399 | 0.468016 |
| H  | 3.063662 | 3.072383 | 0.893099 |
| C  | 1.025034 | 3.307384 | 1.37751  |
| C  | -0.28807 | 3.823343 | 0.929498 |
| H  | -1.02601 | 3.722181 | 1.726609 |
| H  | -0.16847 | 4.907102 | 0.73234  |
| N  | -0.85428 | 3.227787 | -0.31757 |
| H  | -1.7774  | 3.663416 | -0.52918 |
| H  | -0.214   | 3.351038 | -1.14584 |
| H  | -1.97552 | 3.371864 | 10.49773 |
| H  | -5.86636 | 3.671899 | 6.011348 |
| H  | -6.85272 | 6.633584 | -0.6961  |
| H  | -5.92479 | 6.330763 | 0.782875 |
| H  | -7.58058 | 0.606849 | 2.011749 |
| H  | -6.22723 | -5.11613 | -5.31817 |
| H  | 3.947628 | 2.53644  | 7.344308 |
| H  | 2.051973 | 4.767081 | -6.60795 |
| H  | 1.543298 | 9.63473  | -4.98152 |
| H  | 7.236322 | 7.664136 | -2.32764 |
| H  | 8.787702 | -5.16839 | -2.12377 |
| H  | 10.08396 | -5.48743 | -0.96518 |
| H  | 7.181835 | -8.05859 | 1.311079 |
| H  | 4.644577 | -8.77028 | -2.92298 |
| H  | 0.100908 | -7.22297 | -3.45284 |

|   |          |          |          |
|---|----------|----------|----------|
| H | 1.930273 | -2.0611  | -6.81174 |
| H | 1.451875 | -1.44475 | -5.21628 |
| H | 2.604834 | 0.078278 | 3.915281 |
| H | 1.816028 | -1.13614 | 3.412578 |
| O | 0.390322 | -0.50653 | -3.09573 |
| H | -0.53054 | -0.22513 | -2.87513 |
| H | 0.273375 | -1.45102 | -2.78215 |
| O | 2.05062  | -4.32526 | 3.547568 |
| H | 1.415481 | -3.61006 | 3.786879 |
| H | 1.518087 | -4.924   | 2.983749 |
| O | -2.43301 | 0.974533 | -0.11933 |
| H | -3.08434 | 1.658444 | -0.40396 |
| H | -2.33218 | 0.306972 | -0.85472 |
| H | 1.022379 | 0.538682 | 2.627094 |
| H | 1.979039 | 3.335123 | -0.49526 |
| H | 1.27064  | 3.576986 | 2.402921 |

<sup>5</sup>Pr<sub>A,C5</sub>

|   |          |          |          |
|---|----------|----------|----------|
| C | -0.29965 | 2.945358 | -4.97702 |
| H | -1.31963 | 2.565371 | -5.12216 |
| C | -0.30546 | 4.267329 | -4.20365 |
| H | 0.712471 | 4.663969 | -4.12657 |
| H | -0.88654 | 5.021322 | -4.75204 |
| C | -0.87812 | 4.112208 | -2.7889  |
| H | -1.89053 | 3.690537 | -2.82541 |
| H | -0.26057 | 3.400856 | -2.22159 |
| C | -0.90951 | 5.422891 | -2.0145  |
| O | -0.07107 | 6.317318 | -2.20906 |
| N | -1.9027  | 5.560338 | -1.10777 |
| H | -2.54684 | 4.796861 | -0.91057 |
| H | -1.91493 | 6.396984 | -0.5306  |
| C | -5.4134  | 8.980307 | -0.31534 |
| H | -6.30099 | 8.866833 | -0.94957 |
| C | -5.20849 | 7.767871 | 0.597373 |
| H | -5.07594 | 6.866644 | -0.01716 |
| H | -4.26448 | 7.891564 | 1.140952 |
| C | -6.33297 | 7.529943 | 1.564422 |
| N | -6.31975 | 6.458347 | 2.45006  |
| C | -7.44764 | 6.5237   | 3.131367 |
| H | -7.7646  | 5.833412 | 3.901334 |
| N | -8.19541 | 7.587566 | 2.740632 |
| H | -9.09994 | 7.84855  | 3.104808 |
| C | -7.49706 | 8.238785 | 1.738838 |
| H | -7.88702 | 9.118777 | 1.252231 |
| C | 3.629824 | -7.30228 | 2.476803 |
| C | 4.66022  | -6.19797 | 2.72417  |
| C | 2.454265 | -7.00273 | 1.524424 |
| O | 5.231311 | -6.12014 | 3.809324 |
| C | 1.674473 | -5.76858 | 1.87772  |
| C | 0.87233  | -5.42938 | 2.943849 |
| N | 1.693771 | -4.65101 | 1.064841 |
| C | 0.92804  | -3.70304 | 1.637685 |
| N | 0.411322 | -4.13887 | 2.785167 |
| H | 4.176381 | -8.17893 | 2.100515 |
| H | 2.814148 | -6.89666 | 0.496316 |
| H | 1.790758 | -7.87685 | 1.530653 |
| H | 0.598488 | -6.01748 | 3.807873 |
| H | 0.750809 | -2.73165 | 1.202335 |
| H | 2.284057 | -4.58459 | 0.188534 |
| N | 4.941173 | -5.3449  | 1.689602 |
| H | 4.494878 | -5.43272 | 0.775401 |
| C | 6.007842 | -4.36962 | 1.822577 |
| H | 6.71119  | -4.72445 | 2.579938 |



|   |          |          |          |
|---|----------|----------|----------|
| C | 5.616934 | -2.93563 | 2.214957 |
| O | 6.498968 | -2.07809 | 2.296655 |
| N | 4.29947  | -2.69926 | 2.413999 |
| C | 3.711188 | -1.3788  | 2.669376 |
| C | 4.401164 | -0.29711 | 1.806851 |
| C | 3.670983 | -0.99436 | 4.157785 |
| O | 4.80185  | 0.762305 | 2.2736   |
| C | 2.682465 | 0.141033 | 4.472788 |
| C | 1.19158  | -0.16326 | 4.270769 |
| O | 0.39644  | 0.805097 | 4.200515 |
| O | 0.850011 | -1.39718 | 4.210476 |
| H | 3.671631 | -3.48603 | 2.310466 |
| H | 2.678265 | -1.45406 | 2.309344 |
| H | 3.404457 | -1.89381 | 4.721668 |
| H | 4.676179 | -0.68897 | 4.46443  |
| H | 2.936217 | 1.031766 | 3.892166 |
| H | 2.79268  | 0.432254 | 5.527782 |
| N | 4.510973 | -0.64211 | 0.489604 |
| H | 3.820181 | -1.30195 | 0.142778 |
| C | 4.820035 | 0.35367  | -0.53117 |
| H | 4.954196 | -0.2247  | -1.45595 |
| C | 3.671728 | 1.340623 | -0.76119 |
| H | 3.477954 | 1.887086 | 0.169228 |
| H | 3.96515  | 2.083909 | -1.5055  |
| C | 2.370547 | 0.657515 | -1.22395 |
| O | 1.533693 | 1.39632  | -1.81498 |
| O | 2.226946 | -0.57817 | -0.96685 |
| C | 6.180079 | 1.025866 | -0.30832 |
| O | 6.446673 | 2.119232 | -0.82022 |
| N | 7.123526 | 0.270089 | 0.319537 |
| H | 6.822805 | -0.53387 | 0.868683 |
| C | 8.468811 | 0.789938 | 0.543149 |
| H | 8.390768 | 1.848845 | 0.815526 |
| C | 9.162789 | 0.02255  | 1.672083 |
| H | 9.203097 | -1.05037 | 1.453667 |
| H | 8.617349 | 0.151904 | 2.611337 |
| H | 10.18245 | 0.398932 | 1.78553  |
| C | 9.341811 | 0.790019 | -0.73398 |
| O | 10.44651 | 1.323216 | -0.73792 |
| N | 8.783718 | 0.179021 | -1.81614 |
| H | 7.877163 | -0.24989 | -1.68442 |
| C | 9.330242 | 0.219167 | -3.15622 |
| H | 10.40286 | 0.415444 | -3.05411 |
| C | 9.13669  | -1.14291 | -3.87325 |
| H | 9.771324 | -1.88158 | -3.37035 |
| H | 9.504466 | -1.01568 | -4.895   |
| C | 7.696525 | -1.61806 | -3.87591 |

|   |          |          |          |
|---|----------|----------|----------|
| C | 7.208947 | -2.43993 | -2.8472  |
| H | 7.894644 | -2.79268 | -2.079   |
| C | 5.860482 | -2.80541 | -2.7906  |
| H | 5.493747 | -3.43081 | -1.98054 |
| C | 4.974032 | -2.36366 | -3.77691 |
| H | 3.924493 | -2.64056 | -3.72482 |
| C | 5.453195 | -1.56699 | -4.82097 |
| H | 4.773411 | -1.22482 | -5.59709 |
| C | 6.798637 | -1.19562 | -4.86899 |
| H | 7.161486 | -0.56066 | -5.67276 |
| C | 8.786553 | 1.378004 | -4.03547 |
| O | 9.120965 | 1.434985 | -5.22245 |
| N | 7.994898 | 2.284182 | -3.41935 |
| H | 7.721222 | 2.144022 | -2.44974 |
| C | 7.504044 | 3.489491 | -4.07597 |
| H | 7.976585 | 3.527144 | -5.05952 |
| C | 5.971429 | 3.555221 | -4.17813 |
| H | 5.556881 | 3.492797 | -3.16309 |
| H | 5.70873  | 4.55273  | -4.56438 |
| C | 5.303363 | 2.48331  | -5.06027 |
| H | 5.562112 | 1.500479 | -4.6432  |
| C | 3.773809 | 2.626466 | -5.00621 |
| H | 3.285302 | 1.860567 | -5.62093 |
| H | 3.383852 | 2.523403 | -3.98673 |
| H | 3.45761  | 3.606801 | -5.38967 |
| C | 5.806901 | 2.523253 | -6.51207 |
| H | 6.877464 | 2.30262  | -6.57706 |
| H | 5.276583 | 1.783906 | -7.12579 |
| H | 5.629692 | 3.510068 | -6.96318 |
| C | -4.66337 | -2.78538 | -6.06582 |
| H | -3.86083 | -3.45713 | -6.38526 |
| C | -4.22927 | -2.00069 | -4.81953 |
| H | -3.36961 | -1.36409 | -5.06601 |
| H | -5.03401 | -1.3288  | -4.50247 |
| C | -3.83889 | -2.86979 | -3.61836 |
| O | -3.89976 | -4.12364 | -3.74049 |
| O | -3.48938 | -2.25312 | -2.5605  |
| C | -5.96352 | -3.55135 | -5.84511 |
| O | -7.0373  | -2.98331 | -5.63709 |
| N | -5.86388 | -4.91441 | -5.91067 |
| H | -4.93426 | -5.29801 | -5.80282 |
| C | -6.99865 | -5.76593 | -5.60556 |
| H | -7.8773  | -5.37353 | -6.12299 |
| C | -7.40203 | -5.90366 | -4.12506 |
| O | -8.41143 | -6.53313 | -3.8311  |
| N | -6.5958  | -5.28279 | -3.22074 |
| H | -5.7415  | -4.82281 | -3.53227 |

|   |          |          |          |
|---|----------|----------|----------|
| C | -6.90208 | -5.28775 | -1.79843 |
| H | -7.381   | -6.24127 | -1.55732 |
| C | -5.6201  | -5.14156 | -0.9566  |
| H | -5.94066 | -5.07355 | 0.086815 |
| H | -5.11135 | -4.20988 | -1.2281  |
| C | -4.68666 | -6.34717 | -1.08074 |
| O | -4.96968 | -7.43701 | -0.60819 |
| N | -3.48581 | -6.09308 | -1.72332 |
| H | -3.50611 | -5.37341 | -2.46095 |
| H | -2.976   | -6.9401  | -1.95501 |
| C | -7.90508 | -4.19612 | -1.35301 |
| O | -8.30751 | -4.18639 | -0.19127 |
| N | -8.27901 | -3.27262 | -2.2748  |
| H | -7.96333 | -3.36312 | -3.23371 |
| C | -9.31785 | -2.30193 | -1.95202 |
| H | -9.11977 | -1.92778 | -0.94277 |
| C | -9.40041 | -1.14992 | -2.96354 |
| H | -9.52855 | -1.56463 | -3.9716  |
| H | -10.33   | -0.60607 | -2.74123 |
| C | -8.23356 | -0.17969 | -2.96617 |
| C | -7.4948  | 0.049154 | -4.13491 |
| H | -7.72737 | -0.5178  | -5.03192 |
| C | -6.4332  | 0.952774 | -4.15835 |
| H | -5.86272 | 1.12262  | -5.06722 |
| C | -6.06993 | 1.642921 | -2.99629 |
| O | -4.97922 | 2.463939 | -3.05573 |
| H | -4.70473 | 2.769517 | -2.14316 |
| C | -6.81087 | 1.443892 | -1.82201 |
| H | -6.54075 | 1.987902 | -0.9206  |
| C | -7.87888 | 0.545187 | -1.81984 |
| H | -8.43942 | 0.40392  | -0.89781 |
| C | 4.577361 | -7.04887 | -2.45185 |
| H | 5.320923 | -6.6368  | -1.76324 |
| C | 3.735053 | -5.93544 | -3.07622 |
| H | 4.379006 | -5.27447 | -3.67235 |
| H | 2.993799 | -6.34007 | -3.7742  |
| C | 2.983007 | -5.03908 | -2.07871 |
| O | 1.976652 | -4.43022 | -2.50791 |
| O | 3.447052 | -4.95998 | -0.88449 |
| C | 0.646894 | -6.54132 | 8.441942 |
| C | 0.656163 | -5.37636 | 7.507636 |
| C | -0.227   | -4.95769 | 6.543699 |
| N | 1.677987 | -4.4395  | 7.474046 |
| C | 1.385635 | -3.52131 | 6.514789 |
| N | 0.23784  | -3.80817 | 5.935188 |
| H | 0.64765  | -6.22674 | 9.493857 |
| H | -0.25308 | -7.13986 | 8.276125 |

|   |          |          |          |
|---|----------|----------|----------|
| H | -1.16615 | -5.39764 | 6.241266 |
| H | 2.015991 | -2.68172 | 6.266735 |
| H | 2.517528 | -4.45477 | 8.035355 |
| C | -1.10978 | 9.402791 | 2.800423 |
| H | -0.31373 | 10.08645 | 3.118116 |
| C | -1.17532 | 8.199712 | 3.770863 |
| H | -0.2373  | 7.631064 | 3.714717 |
| H | -1.23751 | 8.594566 | 4.794436 |
| C | -2.36108 | 7.275335 | 3.48256  |
| H | -3.28952 | 7.865176 | 3.48675  |
| H | -2.25524 | 6.888321 | 2.466265 |
| C | -2.53607 | 6.084107 | 4.434802 |
| H | -1.61052 | 5.518456 | 4.568105 |
| H | -2.85105 | 6.406089 | 5.433676 |
| N | -3.58038 | 5.178249 | 3.918806 |
| H | -4.49242 | 5.62462  | 3.858718 |
| C | -3.32635 | 4.420612 | 2.806316 |
| N | -2.13501 | 3.886697 | 2.600921 |
| H | -1.40817 | 3.819006 | 3.335142 |
| H | -1.9977  | 3.323146 | 1.749224 |
| N | -4.33813 | 4.226326 | 1.942093 |
| H | -5.12197 | 4.878912 | 1.995449 |
| H | -4.1665  | 3.761036 | 1.046306 |
| C | -0.9155  | 9.00085  | 1.336492 |
| O | -1.7844  | 8.378216 | 0.710932 |
| N | 0.258168 | 9.39437  | 0.786116 |
| H | 1.003569 | 9.735529 | 1.384152 |
| C | 0.726125 | 8.95517  | -0.51909 |
| H | 0.025232 | 8.235534 | -0.94367 |
| C | 2.128089 | 8.358905 | -0.32726 |
| O | 2.889327 | 8.849657 | 0.512834 |
| N | 2.417571 | 7.30653  | -1.12161 |
| H | 1.650626 | 6.897076 | -1.65855 |
| C | 3.634327 | 6.517516 | -0.94989 |
| H | 4.345702 | 7.143012 | -0.40487 |
| C | 3.379132 | 5.19461  | -0.20289 |
| H | 2.687118 | 4.581114 | -0.79302 |
| H | 4.319993 | 4.634043 | -0.14385 |
| C | 2.811014 | 5.413631 | 1.203082 |
| H | 3.531034 | 5.94972  | 1.830612 |
| H | 1.900916 | 6.02057  | 1.162007 |
| S | 2.424562 | 3.868733 | 2.115577 |
| C | 1.005805 | 3.233477 | 1.14773  |
| H | 0.586088 | 2.402509 | 1.719394 |
| H | 0.239801 | 4.004771 | 1.031939 |
| H | 1.302215 | 2.860608 | 0.16562  |
| O | -2.3548  | -1.86599 | 5.418105 |

|    |          |          |          |
|----|----------|----------|----------|
| C  | -2.95361 | -2.95849 | 5.20663  |
| O  | -2.42048 | -3.86959 | 4.484832 |
| C  | -4.32012 | -3.23436 | 5.819415 |
| C  | -4.95159 | -2.03733 | 6.529592 |
| H  | -4.97002 | -3.61436 | 5.021184 |
| H  | -4.19204 | -4.07639 | 6.513867 |
| H  | -5.11659 | -1.20796 | 5.833933 |
| H  | -5.91861 | -2.31298 | 6.965832 |
| O  | -1.57747 | -1.91047 | 2.214974 |
| O  | -2.1946  | 0.232737 | 3.598531 |
| Fe | -0.6101  | -2.80094 | 4.129663 |
| C  | -2.50142 | -0.38945 | -0.00734 |
| H  | -1.82747 | 0.135473 | 0.66938  |
| H  | -1.86005 | -0.97397 | -0.66966 |
| C  | -3.25321 | 0.666482 | -0.83136 |
| H  | -4.33592 | 0.53581  | -0.73828 |
| C  | -2.94184 | 2.127051 | -0.3903  |
| O  | -3.79275 | 3.026893 | -0.73777 |
| O  | -1.93312 | 2.327811 | 0.304203 |
| H  | -0.9825  | -3.09623 | -0.68137 |
| N  | -2.9529  | 0.468634 | -2.29011 |
| H  | -1.89119 | 0.419581 | -2.49714 |
| H  | -3.43214 | 1.179606 | -2.86121 |
| H  | -3.2956  | -0.48696 | -2.55185 |
| C  | -3.46615 | -1.2791  | 0.789483 |
| H  | -4.01373 | -0.64044 | 1.493352 |
| C  | -2.77588 | -2.39265 | 1.59674  |
| C  | -2.48884 | -3.67785 | 0.814625 |
| H  | -1.79468 | -4.29634 | 1.384684 |
| H  | -3.42544 | -4.22812 | 0.704443 |
| N  | -1.93904 | -3.54208 | -0.58011 |
| H  | -1.88795 | -4.49047 | -0.97442 |
| H  | -2.58159 | -3.03056 | -1.23909 |
| H  | 1.51442  | -7.19664 | 8.290137 |
| H  | 3.257819 | -7.57301 | 3.469302 |
| H  | 5.105102 | -7.62112 | -3.2245  |
| H  | 3.954497 | -7.75123 | -1.88419 |
| H  | 6.544845 | -4.28606 | 0.872161 |
| H  | 7.856886 | 4.359652 | -3.50565 |
| H  | -4.30159 | -1.66861 | 7.328614 |
| H  | -4.85084 | -2.07689 | -6.88127 |
| H  | -6.80749 | -6.77028 | -5.99543 |
| H  | -10.2931 | -2.80854 | -1.90738 |
| H  | -4.54315 | 9.106184 | -0.9656  |
| H  | -5.52776 | 9.902581 | 0.267605 |
| H  | -2.05445 | 9.958559 | 2.85611  |
| H  | 0.798325 | 9.812033 | -1.20362 |

|   |          |          |          |
|---|----------|----------|----------|
| H | 4.058264 | 6.301046 | -1.93746 |
| H | 0.148442 | 3.074479 | -5.96952 |
| H | 0.266194 | 2.17266  | -4.44635 |
| H | -2.4446  | -0.31105 | 4.375255 |
| H | -1.27213 | 0.525672 | 3.823915 |
| O | -0.42669 | -0.02108 | -2.9026  |
| H | -0.22062 | -0.94435 | -2.64455 |
| H | 0.303049 | 0.525646 | -2.46889 |
| O | 0.026671 | 3.607848 | 4.401375 |
| H | 0.203813 | 2.64166  | 4.464477 |
| H | 0.799222 | 3.945774 | 3.903025 |
| O | 0.393854 | -2.43704 | -1.46374 |
| H | 0.986895 | -3.14264 | -1.84464 |
| H | 1.017141 | -1.69313 | -1.21191 |
| H | -1.80182 | -1.01655 | 2.635769 |
| H | -4.21664 | -1.7307  | 0.125984 |
| H | -3.46555 | -2.72786 | 2.383323 |

**Model 2 structures:**

<sup>5</sup>Re<sub>B</sub>

|   |          |          |          |
|---|----------|----------|----------|
| C | -2.58559 | -3.25979 | 5.185932 |
| H | -2.14366 | -2.80753 | 4.289227 |
| C | -1.47472 | -3.64232 | 6.169501 |
| H | -1.90848 | -3.89286 | 7.144703 |
| H | -0.98137 | -4.54754 | 5.809683 |
| C | -0.42981 | -2.53403 | 6.351205 |
| H | -0.88527 | -1.62438 | 6.764461 |
| H | 0.324286 | -2.86042 | 7.080538 |
| C | 0.299166 | -2.19615 | 5.048072 |
| O | 0.39928  | -3.0381  | 4.141597 |
| N | 0.834488 | -0.96462 | 4.950951 |
| H | 0.658724 | -0.27725 | 5.669806 |
| H | 1.182593 | -0.64191 | 4.030268 |
| C | -3.4122  | -4.4514  | 4.706963 |
| O | -3.05918 | -5.62331 | 4.897382 |
| N | -4.54365 | -4.13569 | 4.02953  |
| H | -4.76406 | -3.15585 | 3.870711 |
| C | -5.37489 | -5.16416 | 3.414785 |
| H | -6.41142 | -4.8069  | 3.412479 |
| C | -4.93977 | -5.55327 | 1.991375 |
| H | -3.86168 | -5.75778 | 1.999445 |
| H | -5.43409 | -6.50193 | 1.735821 |
| C | -5.28638 | -4.51641 | 0.91425  |
| H | -4.85494 | -3.53594 | 1.148134 |
| H | -6.37758 | -4.38684 | 0.888607 |
| C | -4.80629 | -4.95914 | -0.47943 |
| H | -3.7562  | -4.70133 | -0.63218 |
| H | -4.88596 | -6.05192 | -0.56477 |
| N | -5.59606 | -4.37826 | -1.56608 |
| H | -6.52651 | -4.77661 | -1.71388 |
| C | -5.12198 | -3.66295 | -2.60428 |
| N | -3.95221 | -3.0263  | -2.56445 |
| H | -3.57788 | -2.62542 | -1.67946 |
| H | -3.6318  | -2.62148 | -3.45135 |
| N | -5.86662 | -3.60947 | -3.72707 |
| H | -6.6859  | -4.20118 | -3.79082 |
| H | -5.74242 | -2.81897 | -4.36689 |
| C | 0.439325 | -8.17975 | 0.118102 |
| H | 1.46922  | -8.52255 | 0.279081 |
| H | 0.45228  | -7.50367 | -0.74603 |
| C | -0.10602 | -7.49813 | 1.334408 |
| N | 0.464764 | -6.34427 | 1.844042 |
| C | -0.25529 | -6.02476 | 2.910542 |
| H | -0.09871 | -5.15701 | 3.539653 |

|   |          |          |          |
|---|----------|----------|----------|
| N | -1.25722 | -6.91063 | 3.118024 |
| H | -1.98192 | -6.78211 | 3.82471  |
| C | -1.17945 | -7.85687 | 2.116152 |
| H | -1.86465 | -8.6892  | 2.05625  |
| C | 6.037314 | 5.189865 | -5.05979 |
| C | 5.880519 | 5.612637 | -3.59871 |
| C | 4.937347 | 4.274899 | -5.64726 |
| O | 6.810982 | 5.463478 | -2.79972 |
| C | 4.686021 | 3.032684 | -4.84316 |
| C | 5.391248 | 1.866234 | -4.65917 |
| N | 3.582024 | 2.933603 | -4.02206 |
| C | 3.638137 | 1.760218 | -3.3805  |
| N | 4.724438 | 1.075478 | -3.74241 |
| H | 6.10387  | 6.098182 | -5.67376 |
| H | 3.994175 | 4.82535  | -5.74462 |
| H | 5.237996 | 4.008444 | -6.66759 |
| H | 6.324029 | 1.55229  | -5.10287 |
| H | 2.910359 | 1.440198 | -2.65422 |
| H | 2.880114 | 3.712129 | -3.84163 |
| N | 4.720164 | 6.231325 | -3.23948 |
| H | 3.853739 | 6.062583 | -3.74562 |
| C | 4.564032 | 6.791665 | -1.90196 |
| H | 5.539907 | 7.172555 | -1.58728 |
| C | 4.029688 | 5.799858 | -0.85382 |
| O | 2.96499  | 6.034021 | -0.27549 |
| N | 4.820715 | 4.722513 | -0.65243 |
| C | 4.49987  | 3.468274 | 0.049574 |
| C | 3.429184 | 3.628508 | 1.162522 |
| C | 5.804167 | 2.921494 | 0.658245 |
| O | 3.746296 | 3.867167 | 2.326577 |
| C | 5.727953 | 1.495469 | 1.217424 |
| C | 5.71261  | 0.339399 | 0.219494 |
| O | 5.671264 | -0.83517 | 0.646031 |
| O | 5.811054 | 0.64948  | -1.02883 |
| H | 5.678091 | 4.708416 | -1.2033  |
| H | 4.115411 | 2.757722 | -0.6926  |
| H | 6.589563 | 2.963468 | -0.10498 |
| H | 6.085039 | 3.596447 | 1.471936 |
| H | 4.860309 | 1.372769 | 1.876478 |
| H | 6.601384 | 1.312858 | 1.856021 |
| N | 2.154285 | 3.377891 | 0.773956 |
| H | 1.922739 | 3.331432 | -0.21908 |
| C | 1.045321 | 3.316715 | 1.722284 |
| H | 0.138825 | 3.280445 | 1.107397 |
| C | 1.089651 | 2.042333 | 2.565953 |
| H | 2.016937 | 2.011312 | 3.143432 |
| H | 0.269647 | 2.077159 | 3.292779 |



|   |          |          |          |
|---|----------|----------|----------|
| C | 0.954881 | 0.753523 | 1.753334 |
| O | 0.38615  | 0.779988 | 0.631617 |
| O | 1.420403 | -0.29756 | 2.310884 |
| C | 0.915388 | 4.56247  | 2.625163 |
| O | 0.458857 | 4.468518 | 3.769767 |
| N | 1.197671 | 5.76211  | 2.049999 |
| H | 1.749283 | 5.754767 | 1.19141  |
| C | 1.28843  | 6.971415 | 2.872347 |
| H | 1.767621 | 6.700976 | 3.822057 |
| C | 2.135805 | 8.040106 | 2.175563 |
| H | 3.159263 | 7.683387 | 2.032217 |
| H | 2.144895 | 8.939287 | 2.795147 |
| H | 1.722815 | 8.292445 | 1.192778 |
| C | -0.06706 | 7.570041 | 3.304872 |
| O | -0.08873 | 8.559098 | 4.03039  |
| N | -1.19351 | 6.931488 | 2.875268 |
| H | -1.08362 | 6.103958 | 2.305223 |
| C | -2.50456 | 7.232679 | 3.421458 |
| H | -2.4622  | 8.274402 | 3.75521  |
| C | -3.61725 | 7.107185 | 2.353502 |
| H | -3.41702 | 7.84709  | 1.570227 |
| H | -4.55396 | 7.381448 | 2.8465   |
| C | -3.73036 | 5.723492 | 1.746439 |
| C | -3.03993 | 5.389557 | 0.571359 |
| H | -2.45813 | 6.153812 | 0.059463 |
| C | -3.09585 | 4.094297 | 0.049019 |
| H | -2.55764 | 3.849651 | -0.86316 |
| C | -3.84993 | 3.110204 | 0.690927 |
| H | -3.87029 | 2.102299 | 0.288826 |
| C | -4.56195 | 3.437099 | 1.847846 |
| H | -5.16525 | 2.681452 | 2.34449  |
| C | -4.5024  | 4.730144 | 2.370243 |
| H | -5.04624 | 4.979169 | 3.277084 |
| C | -2.87274 | 6.425462 | 4.69411  |
| O | -3.9886  | 6.579182 | 5.198215 |
| N | -1.91256 | 5.616468 | 5.198496 |
| H | -1.04085 | 5.484921 | 4.690028 |
| C | -2.05484 | 4.925894 | 6.472609 |
| H | -3.02766 | 5.211249 | 6.877201 |
| C | -1.90743 | 3.400965 | 6.362616 |
| H | -0.9113  | 3.17953  | 5.956122 |
| H | -1.92858 | 2.991964 | 7.385064 |
| C | -2.96339 | 2.679058 | 5.504766 |
| H | -2.89434 | 3.078491 | 4.484286 |
| C | -2.64901 | 1.176235 | 5.440902 |
| H | -3.34466 | 0.648884 | 4.776764 |
| H | -1.63705 | 0.991573 | 5.059524 |

|   |          |          |          |
|---|----------|----------|----------|
| H | -2.71857 | 0.719459 | 6.439591 |
| C | -4.39639 | 2.916407 | 6.006199 |
| H | -5.11844 | 2.35243  | 5.401134 |
| H | -4.50908 | 2.590294 | 7.050261 |
| H | -4.67539 | 3.973303 | 5.948908 |
| C | -6.46405 | 1.76067  | -2.88143 |
| H | -6.09436 | 2.261718 | -3.78403 |
| C | -5.40309 | 0.744842 | -2.41595 |
| H | -5.51982 | 0.522137 | -1.35291 |
| H | -5.50417 | -0.2025  | -2.95917 |
| C | -3.95803 | 1.205631 | -2.66342 |
| O | -3.70494 | 1.850556 | -3.7336  |
| O | -3.09766 | 0.879663 | -1.80538 |
| C | -7.83036 | 1.16451  | -3.18497 |
| O | -8.86283 | 1.528661 | -2.6143  |
| N | -7.85732 | 0.197192 | -4.1564  |
| H | -6.98806 | -0.17584 | -4.54369 |
| C | -9.11045 | -0.29536 | -4.69788 |
| H | -9.8005  | 0.541675 | -4.85294 |
| C | -9.88346 | -1.31402 | -3.85461 |
| O | -10.9069 | -1.83707 | -4.29859 |
| N | -9.39016 | -1.56772 | -2.61643 |
| H | -8.51267 | -1.13546 | -2.36083 |
| C | -10.1253 | -2.32316 | -1.61452 |
| H | -11.1183 | -2.49248 | -2.04475 |
| C | -9.45414 | -3.6692  | -1.30749 |
| H | -10.0825 | -4.21522 | -0.59547 |
| H | -8.49158 | -3.50496 | -0.81331 |
| C | -9.18831 | -4.54854 | -2.52273 |
| O | -8.16635 | -5.25127 | -2.58771 |
| N | -10.1256 | -4.58575 | -3.49898 |
| H | -10.7595 | -3.80549 | -3.66325 |
| H | -9.89301 | -5.15007 | -4.30722 |
| C | -10.3752 | -1.53248 | -0.30603 |
| O | -10.7178 | -2.14072 | 0.702557 |
| N | -10.233  | -0.18623 | -0.39318 |
| H | -9.97865 | 0.242327 | -1.27893 |
| C | -10.5374 | 0.713423 | 0.71314  |
| H | -10.8623 | 0.090835 | 1.5495   |
| C | -9.33927 | 1.602771 | 1.11057  |
| H | -8.94108 | 2.070624 | 0.201495 |
| H | -9.72887 | 2.416082 | 1.735439 |
| C | -8.2412  | 0.879272 | 1.85997  |
| C | -7.19094 | 0.23382  | 1.190957 |
| H | -7.1589  | 0.269903 | 0.105909 |
| C | -6.17327 | -0.43035 | 1.876741 |
| H | -5.33974 | -0.8893  | 1.350566 |

|   |          |          |          |
|---|----------|----------|----------|
| C | -6.21014 | -0.4617  | 3.2723   |
| O | -5.19614 | -1.13233 | 3.931568 |
| H | -5.23249 | -0.90201 | 4.87384  |
| C | -7.24432 | 0.168258 | 3.967113 |
| H | -7.26858 | 0.143179 | 5.054949 |
| C | -8.24442 | 0.834531 | 3.259356 |
| H | -9.0376  | 1.332869 | 3.811703 |
| C | 0.229003 | 5.726548 | -2.12156 |
| H | 0.751835 | 6.367237 | -1.40281 |
| H | -0.61782 | 5.257682 | -1.61399 |
| C | 1.220443 | 4.683211 | -2.61812 |
| O | 1.990561 | 5.021003 | -3.57061 |
| O | 1.254826 | 3.544717 | -2.05407 |
| C | 10.33676 | -0.62622 | -5.28683 |
| C | 9.271618 | -0.45006 | -4.25561 |
| C | 7.914677 | -0.62597 | -4.29462 |
| N | 9.532071 | -0.03542 | -2.95582 |
| C | 8.368029 | 0.032739 | -2.27021 |
| N | 7.365058 | -0.31609 | -3.06254 |
| H | 11.09027 | -1.3603  | -4.97455 |
| H | 9.893271 | -0.98399 | -6.21985 |
| H | 7.297848 | -0.98164 | -5.10487 |
| H | 8.313246 | 0.250112 | -1.21278 |
| H | 10.44164 | 0.15976  | -2.56151 |
| C | 7.559132 | -6.58598 | -0.97826 |
| H | 8.342815 | -6.51762 | -1.7431  |
| C | 6.597762 | -5.38378 | -1.11973 |
| H | 7.141957 | -4.46048 | -0.87268 |
| H | 6.285729 | -5.28128 | -2.1645  |
| C | 5.349274 | -5.49033 | -0.23165 |
| H | 4.749337 | -6.35149 | -0.56086 |
| H | 5.626989 | -5.68232 | 0.811329 |
| C | 4.512531 | -4.21343 | -0.32398 |
| H | 5.09716  | -3.36969 | 0.052475 |
| H | 4.264472 | -4.00432 | -1.36958 |
| N | 3.285335 | -4.32754 | 0.471472 |
| H | 2.823799 | -5.22917 | 0.499635 |
| C | 2.608678 | -3.30836 | 1.023553 |
| N | 3.097435 | -2.08295 | 1.117405 |
| H | 4.026951 | -1.81688 | 0.796995 |
| H | 2.481083 | -1.34525 | 1.511006 |
| N | 1.344626 | -3.54522 | 1.480499 |
| H | 1.065127 | -4.53492 | 1.483977 |
| H | 1.077833 | -3.0588  | 2.346102 |
| C | 8.181554 | -6.63224 | 0.410049 |
| O | 7.703653 | -7.2733  | 1.33991  |
| N | 9.31167  | -5.85677 | 0.555627 |

|    |          |          |          |
|----|----------|----------|----------|
| H  | 9.52355  | -5.17887 | -0.1673  |
| C  | 9.792671 | -5.49449 | 1.869835 |
| H  | 9.180677 | -6.03054 | 2.601333 |
| C  | 9.728849 | -3.97355 | 2.054541 |
| O  | 9.797834 | -3.22896 | 1.069882 |
| N  | 9.646208 | -3.54257 | 3.332773 |
| H  | 9.531976 | -4.24199 | 4.053844 |
| C  | 9.647236 | -2.13332 | 3.735905 |
| H  | 10.09484 | -1.56622 | 2.918068 |
| C  | 8.254437 | -1.56067 | 4.041348 |
| H  | 8.379397 | -0.5     | 4.289681 |
| H  | 7.654015 | -1.59574 | 3.127714 |
| C  | 7.530987 | -2.26512 | 5.192625 |
| H  | 7.341097 | -3.32007 | 4.956562 |
| H  | 8.143874 | -2.24059 | 6.102733 |
| S  | 5.946361 | -1.48503 | 5.689459 |
| C  | 4.891909 | -1.86844 | 4.24471  |
| H  | 3.899144 | -1.47087 | 4.471767 |
| H  | 5.252998 | -1.39688 | 3.327345 |
| H  | 4.807538 | -2.95031 | 4.099024 |
| O  | 3.857671 | -0.83088 | -1.95557 |
| O  | 8.590985 | -0.67571 | 0.773894 |
| Fe | 5.35598  | -0.52585 | -2.52448 |
| C  | -2.36006 | 0.102942 | -7.00965 |
| H  | -2.31698 | 0.450629 | -8.0508  |
| H  | -1.94508 | -0.91015 | -6.99701 |
| C  | -3.8431  | -0.05314 | -6.63797 |
| H  | -4.39598 | -0.32871 | -7.54394 |
| C  | -4.23014 | -1.12348 | -5.57208 |
| O  | -3.35587 | -1.90993 | -5.18247 |
| O  | -5.46294 | -1.08334 | -5.23791 |
| N  | -4.48556 | 1.229074 | -6.15257 |
| H  | -4.15863 | 1.505088 | -5.13651 |
| H  | -5.48794 | 1.034017 | -6.07097 |
| H  | -4.33818 | 2.015424 | -6.78995 |
| C  | -1.48164 | 1.043543 | -6.16334 |
| H  | -1.97804 | 2.019947 | -6.06176 |
| H  | -0.57115 | 1.24454  | -6.74299 |
| C  | -1.08904 | 0.538917 | -4.76776 |
| H  | -0.37234 | -0.28656 | -4.84433 |
| H  | -1.96327 | 0.144892 | -4.24866 |
| C  | -0.49656 | 1.68473  | -3.94775 |
| H  | 0.496565 | 1.975103 | -4.29989 |
| H  | -1.15151 | 2.557471 | -3.99713 |
| N  | -0.37164 | 1.333832 | -2.50357 |
| H  | 10.83736 | -5.80885 | 2.010697 |
| H  | 10.30064 | -2.04062 | 4.612382 |

|   |          |          |          |
|---|----------|----------|----------|
| H | -0.16598 | -9.05244 | -0.14701 |
| H | 7.019851 | -7.52574 | -1.13117 |
| H | -5.32355 | -6.04294 | 4.062454 |
| H | -3.24845 | -2.49832 | 5.617221 |
| H | 10.8579  | 0.315043 | -5.50371 |
| H | 7.005039 | 4.685026 | -5.11264 |
| H | -0.12029 | 6.352893 | -2.94719 |
| H | 3.851149 | 7.616494 | -1.94502 |
| H | -1.28842 | 5.302685 | 7.164129 |
| H | -6.61211 | 2.535602 | -2.12561 |
| H | -8.91888 | -0.75346 | -5.67172 |
| H | -11.3771 | 1.357329 | 0.420343 |
| H | 9.092772 | -1.51523 | 0.797483 |
| H | 7.658319 | -0.95624 | 0.822449 |
| C | 4.533574 | -2.91054 | -3.9775  |
| O | 4.581647 | -4.10397 | -3.72175 |
| O | 5.480592 | -2.06785 | -3.55814 |
| C | 3.424693 | -2.31583 | -4.82677 |
| H | 3.771685 | -1.44165 | -5.38417 |
| H | 2.604295 | -1.99908 | -4.17169 |
| H | 3.041022 | -3.07936 | -5.50788 |
| H | 0.099316 | 2.120343 | -2.01557 |
| H | -1.32555 | 1.176428 | -2.1089  |
| H | 0.209598 | 0.463495 | -2.38797 |
| O | 1.058714 | -1.03211 | -2.452   |
| H | 1.993856 | -0.95472 | -2.17472 |
| H | 0.588102 | -1.45345 | -1.68556 |
| O | -3.10488 | -1.59825 | -0.34009 |
| H | -3.18745 | -0.7038  | -0.7383  |
| H | -2.13104 | -1.69014 | -0.18506 |
| O | -0.32296 | -1.66094 | -0.19426 |
| H | 0.119553 | -2.32888 | 0.371149 |
| H | -0.04849 | -0.76781 | 0.187516 |

<sup>5</sup>TS1<sub>B,C3</sub>

|   |          |          |          |
|---|----------|----------|----------|
| C | -5.46435 | 1.576448 | 4.879669 |
| H | -4.57762 | 1.611336 | 4.23431  |
| C | -5.02781 | 1.485396 | 6.347984 |
| H | -5.82305 | 1.866803 | 6.998654 |
| H | -4.88823 | 0.434485 | 6.610554 |
| C | -3.73262 | 2.254514 | 6.635273 |
| H | -3.80549 | 3.295891 | 6.2925   |
| H | -3.56016 | 2.303055 | 7.719217 |
| C | -2.49494 | 1.612145 | 6.000888 |
| O | -2.54829 | 0.498044 | 5.458537 |
| N | -1.33896 | 2.298497 | 6.10108  |
| H | -1.34077 | 3.255345 | 6.425347 |
| H | -0.54088 | 1.987619 | 5.535725 |
| C | -6.29322 | 0.382373 | 4.399848 |
| O | -6.49918 | -0.61651 | 5.099793 |
| N | -6.74564 | 0.480981 | 3.123378 |
| H | -6.47534 | 1.290732 | 2.571568 |
| C | -7.2481  | -0.67665 | 2.382181 |
| H | -7.7245  | -0.29771 | 1.473458 |
| C | -6.1389  | -1.69052 | 2.033775 |
| H | -5.79942 | -2.15883 | 2.964571 |
| H | -6.58806 | -2.48567 | 1.425701 |
| C | -4.93608 | -1.055   | 1.320886 |
| H | -4.66245 | -0.13579 | 1.852464 |
| H | -5.18674 | -0.75268 | 0.298571 |
| C | -3.67076 | -1.91699 | 1.30018  |
| H | -2.81172 | -1.28606 | 1.07636  |
| H | -3.50151 | -2.35385 | 2.294039 |
| N | -3.68447 | -3.01253 | 0.322445 |
| H | -4.3016  | -3.81137 | 0.487003 |
| C | -2.72339 | -3.22159 | -0.59296 |
| N | -1.88571 | -2.24092 | -0.9695  |
| H | -2.24281 | -1.26465 | -1.02826 |
| H | -1.17901 | -2.51823 | -1.64834 |
| N | -2.56161 | -4.45241 | -1.10808 |
| H | -3.20411 | -5.18616 | -0.82874 |
| H | -1.96607 | -4.53853 | -1.93743 |
| C | -2.92785 | -6.01233 | 5.532379 |
| H | -2.11157 | -6.01967 | 6.26458  |
| H | -2.49555 | -6.28361 | 4.56     |
| C | -3.59919 | -4.67512 | 5.482667 |
| N | -2.89657 | -3.51285 | 5.20883  |
| C | -3.7902  | -2.53212 | 5.253132 |
| H | -3.58537 | -1.47683 | 5.12995  |
| N | -5.02663 | -3.00035 | 5.536677 |

|   |          |          |          |
|---|----------|----------|----------|
| H | -5.84728 | -2.39741 | 5.564434 |
| C | -4.92516 | -4.36778 | 5.683028 |
| H | -5.7788  | -4.98873 | 5.909366 |
| C | 8.105048 | 2.104204 | -3.99951 |
| C | 7.751211 | 2.824389 | -2.69634 |
| C | 6.90554  | 1.591601 | -4.83659 |
| O | 8.199815 | 2.431845 | -1.61416 |
| C | 5.942422 | 0.765367 | -4.03851 |
| C | 5.927352 | -0.55181 | -3.64042 |
| N | 4.846259 | 1.349988 | -3.43458 |
| C | 4.222841 | 0.408605 | -2.71098 |
| N | 4.842451 | -0.76519 | -2.81355 |
| H | 8.705921 | 2.778314 | -4.62369 |
| H | 6.360111 | 2.433417 | -5.27783 |
| H | 7.302265 | 1.001883 | -5.67065 |
| H | 6.621628 | -1.34424 | -3.87471 |
| H | 3.33112  | 0.589245 | -2.13451 |
| H | 4.536594 | 2.352659 | -3.61518 |
| N | 6.98147  | 3.943228 | -2.80182 |
| H | 6.317421 | 4.051936 | -3.57327 |
| C | 6.658297 | 4.722829 | -1.61355 |
| H | 7.528609 | 4.703876 | -0.95179 |
| C | 5.416323 | 4.221995 | -0.86331 |
| O | 4.376    | 4.886602 | -0.83816 |
| N | 5.553016 | 3.01951  | -0.25789 |
| C | 4.455803 | 2.338526 | 0.430219 |
| C | 3.80223  | 3.301348 | 1.457945 |
| C | 5.027971 | 1.094318 | 1.138361 |
| O | 4.45401  | 3.777259 | 2.380691 |
| C | 3.979132 | 0.109375 | 1.698536 |
| C | 3.324415 | -0.79713 | 0.651779 |
| O | 2.082861 | -0.80924 | 0.500773 |
| O | 4.136869 | -1.54643 | -0.01793 |
| H | 6.455546 | 2.556854 | -0.34404 |
| H | 3.703006 | 2.045505 | -0.31242 |
| H | 5.678026 | 0.551415 | 0.442056 |
| H | 5.650622 | 1.454956 | 1.963954 |
| H | 3.194427 | 0.636579 | 2.250062 |
| H | 4.495132 | -0.55612 | 2.401953 |
| N | 2.48474  | 3.560575 | 1.242076 |
| H | 2.00699  | 3.073161 | 0.486563 |
| C | 1.678995 | 4.415844 | 2.110879 |
| H | 0.700289 | 4.482247 | 1.622017 |
| C | 1.412551 | 3.77876  | 3.480445 |
| H | 2.340355 | 3.436871 | 3.942585 |
| H | 0.974422 | 4.544364 | 4.130379 |
| C | 0.426569 | 2.61893  | 3.329464 |

|   |          |          |          |
|---|----------|----------|----------|
| O | -0.52152 | 2.784551 | 2.512161 |
| O | 0.62541  | 1.582196 | 4.041637 |
| C | 2.150988 | 5.873501 | 2.234234 |
| O | 1.73317  | 6.573701 | 3.164524 |
| N | 2.894105 | 6.39119  | 1.224803 |
| H | 3.316482 | 5.768846 | 0.535464 |
| C | 3.407176 | 7.756236 | 1.341979 |
| H | 3.804249 | 7.892088 | 2.353784 |
| C | 4.522029 | 8.01442  | 0.323593 |
| H | 5.366613 | 7.342149 | 0.500698 |
| H | 4.86016  | 9.04867  | 0.425567 |
| H | 4.168176 | 7.856505 | -0.70084 |
| C | 2.323307 | 8.846998 | 1.221823 |
| O | 2.563827 | 9.989911 | 1.594332 |
| N | 1.133303 | 8.462551 | 0.676316 |
| H | 1.042407 | 7.506532 | 0.357645 |
| C | -0.01454 | 9.346035 | 0.591448 |
| H | 0.361755 | 10.33521 | 0.875803 |
| C | -0.58195 | 9.442052 | -0.84549 |
| H | 0.175355 | 9.932929 | -1.46685 |
| H | -1.45524 | 10.09786 | -0.79494 |
| C | -0.95916 | 8.109896 | -1.46182 |
| C | -0.04481 | 7.408295 | -2.26093 |
| H | 0.934894 | 7.841092 | -2.45303 |
| C | -0.37116 | 6.172822 | -2.82724 |
| H | 0.366166 | 5.657242 | -3.43803 |
| C | -1.63331 | 5.62024  | -2.59871 |
| H | -1.9039  | 4.663383 | -3.04058 |
| C | -2.55606 | 6.30639  | -1.80384 |
| H | -3.54169 | 5.882814 | -1.62661 |
| C | -2.22321 | 7.539029 | -1.23943 |
| H | -2.93957 | 8.070995 | -0.61987 |
| C | -1.13207 | 9.018168 | 1.612073 |
| O | -2.24535 | 9.535199 | 1.485351 |
| N | -0.78972 | 8.201153 | 2.636393 |
| H | 0.155536 | 7.829452 | 2.694142 |
| C | -1.6843  | 7.927863 | 3.754233 |
| H | -2.48323 | 8.671454 | 3.713942 |
| C | -2.25579 | 6.499749 | 3.7667   |
| H | -1.41725 | 5.789865 | 3.780476 |
| H | -2.79207 | 6.368999 | 4.720978 |
| C | -3.20219 | 6.126161 | 2.608641 |
| H | -2.64655 | 6.253224 | 1.669013 |
| C | -3.59956 | 4.645679 | 2.721972 |
| H | -4.24052 | 4.336456 | 1.886506 |
| H | -2.71759 | 3.995306 | 2.730401 |
| H | -4.16283 | 4.469234 | 3.651401 |



|   |          |          |          |
|---|----------|----------|----------|
| C | -4.44373 | 7.028979 | 2.547704 |
| H | -5.12114 | 6.698379 | 1.749538 |
| H | -5.00416 | 6.99134  | 3.493232 |
| H | -4.17537 | 8.069489 | 2.341875 |
| C | -4.24124 | -0.7638  | -5.74887 |
| H | -3.49194 | -1.01338 | -6.50838 |
| C | -3.51209 | -0.48809 | -4.42084 |
| H | -4.1744  | 0.001429 | -3.70297 |
| H | -3.18652 | -1.43419 | -3.96835 |
| C | -2.23795 | 0.361269 | -4.59092 |
| O | -1.48261 | 0.102954 | -5.57971 |
| O | -2.00113 | 1.2245   | -3.70021 |
| C | -5.26853 | -1.88385 | -5.66809 |
| O | -6.48265 | -1.69388 | -5.79506 |
| N | -4.75981 | -3.13542 | -5.44534 |
| H | -3.7673  | -3.26109 | -5.24599 |
| C | -5.56672 | -4.32901 | -5.60844 |
| H | -6.23634 | -4.20578 | -6.4677  |
| C | -6.46457 | -4.72325 | -4.43495 |
| O | -7.05879 | -5.80432 | -4.43724 |
| N | -6.58237 | -3.80964 | -3.44037 |
| H | -6.00943 | -2.97808 | -3.49652 |
| C | -7.57726 | -3.91554 | -2.38588 |
| H | -8.22293 | -4.75341 | -2.67123 |
| C | -6.94188 | -4.18683 | -1.01701 |
| H | -7.74394 | -4.24998 | -0.27312 |
| H | -6.31772 | -3.33645 | -0.728   |
| C | -6.07017 | -5.43122 | -0.90082 |
| O | -5.14501 | -5.47154 | -0.0694  |
| N | -6.36718 | -6.49842 | -1.67237 |
| H | -6.89324 | -6.41688 | -2.54318 |
| H | -5.75218 | -7.29764 | -1.583   |
| C | -8.5181  | -2.68519 | -2.30778 |
| O | -9.19595 | -2.51595 | -1.29884 |
| N | -8.55944 | -1.89881 | -3.41253 |
| H | -7.97147 | -2.11449 | -4.21314 |
| C | -9.50601 | -0.79865 | -3.56324 |
| H | -10.1307 | -0.7928  | -2.66741 |
| C | -8.82673 | 0.572186 | -3.77494 |
| H | -8.07704 | 0.46757  | -4.56919 |
| H | -9.59458 | 1.257387 | -4.15706 |
| C | -8.19884 | 1.161699 | -2.53064 |
| C | -6.83951 | 0.984399 | -2.24147 |
| H | -6.21916 | 0.431357 | -2.94184 |
| C | -6.25259 | 1.515473 | -1.0928  |
| H | -5.19139 | 1.382937 | -0.90213 |
| C | -7.04668 | 2.235089 | -0.19754 |

|   |          |          |          |
|---|----------|----------|----------|
| O | -6.44835 | 2.715256 | 0.955539 |
| H | -7.00443 | 3.418014 | 1.32888  |
| C | -8.40429 | 2.433548 | -0.46122 |
| H | -9.02067 | 2.999112 | 0.235327 |
| C | -8.96629 | 1.902313 | -1.62217 |
| H | -10.0226 | 2.06983  | -1.82075 |
| C | 3.767665 | 6.151082 | -4.25039 |
| H | 3.943631 | 6.513757 | -3.22997 |
| H | 2.93515  | 6.71272  | -4.68072 |
| C | 3.438019 | 4.664145 | -4.16114 |
| O | 4.438603 | 3.865426 | -4.12723 |
| O | 2.23079  | 4.329939 | -4.10109 |
| C | 9.44454  | -4.89071 | -1.32633 |
| C | 8.180408 | -4.12951 | -1.09269 |
| C | 7.229799 | -3.63788 | -1.95332 |
| N | 7.751342 | -3.73701 | 0.165435 |
| C | 6.591043 | -3.05433 | 0.027062 |
| N | 6.244029 | -2.9722  | -1.24751 |
| H | 9.469703 | -5.83091 | -0.76079 |
| H | 9.540544 | -5.13781 | -2.38732 |
| H | 7.183732 | -3.73195 | -3.02809 |
| H | 6.03484  | -2.65452 | 0.86129  |
| H | 8.068261 | -4.08499 | 1.067086 |
| C | 2.009157 | -7.05568 | 0.871632 |
| H | 2.105721 | -7.51947 | -0.12001 |
| C | 1.36612  | -5.66576 | 0.705403 |
| H | 1.998531 | -5.02338 | 0.083184 |
| H | 0.432721 | -5.79728 | 0.142123 |
| C | 1.047188 | -4.97986 | 2.038275 |
| H | 0.403669 | -5.63901 | 2.639742 |
| H | 1.963462 | -4.82664 | 2.62411  |
| C | 0.344501 | -3.63148 | 1.840662 |
| H | 1.025018 | -2.91215 | 1.378912 |
| H | -0.50175 | -3.74963 | 1.151461 |
| N | -0.1263  | -3.11076 | 3.124317 |
| H | -0.69965 | -3.73848 | 3.680398 |
| C | -0.21106 | -1.81684 | 3.504351 |
| N | 0.24916  | -0.80325 | 2.756403 |
| H | 0.916978 | -0.96118 | 1.997087 |
| H | 0.346224 | 0.119135 | 3.249058 |
| N | -0.77148 | -1.56192 | 4.692605 |
| H | -1.32375 | -2.31923 | 5.108262 |
| H | -1.11288 | -0.61755 | 4.900581 |
| C | 3.386413 | -7.11483 | 1.529124 |
| O | 3.623126 | -7.90668 | 2.451075 |
| N | 4.350274 | -6.30082 | 1.01633  |
| H | 4.142065 | -5.71586 | 0.201184 |

|    |          |          |          |
|----|----------|----------|----------|
| C  | 5.762336 | -6.54092 | 1.308416 |
| H  | 5.948778 | -7.62235 | 1.308407 |
| C  | 6.260058 | -5.96394 | 2.648313 |
| O  | 7.06949  | -5.01567 | 2.69246  |
| N  | 5.781954 | -6.58345 | 3.738485 |
| H  | 5.059785 | -7.28748 | 3.567686 |
| C  | 6.186704 | -6.24387 | 5.102378 |
| H  | 7.209533 | -5.86143 | 5.049019 |
| C  | 5.286054 | -5.20703 | 5.79423  |
| H  | 5.725579 | -4.97315 | 6.771511 |
| H  | 5.301708 | -4.28344 | 5.206468 |
| C  | 3.845446 | -5.68749 | 5.993167 |
| H  | 3.366854 | -5.91279 | 5.031967 |
| H  | 3.828686 | -6.61287 | 6.582089 |
| S  | 2.781016 | -4.52852 | 6.938411 |
| C  | 2.650071 | -3.13085 | 5.766346 |
| H  | 2.017607 | -2.37864 | 6.244791 |
| H  | 3.621818 | -2.68487 | 5.540591 |
| H  | 2.163712 | -3.44669 | 4.838004 |
| O  | 2.410302 | -2.36269 | -2.27675 |
| O  | 5.382538 | -2.75097 | 3.205118 |
| Fe | 4.106247 | -2.47749 | -1.76923 |
| C  | 1.637478 | -2.53268 | -4.6691  |
| H  | 2.482327 | -3.18403 | -4.90235 |
| H  | 1.818016 | -2.61027 | -3.33446 |
| C  | 0.328584 | -3.12109 | -5.18959 |
| H  | 0.574769 | -4.04077 | -5.73484 |
| C  | -0.83721 | -3.57517 | -4.22017 |
| O  | -0.53269 | -3.89443 | -3.05585 |
| O  | -1.95938 | -3.6239  | -4.79636 |
| N  | -0.38386 | -2.25514 | -6.21167 |
| H  | -0.72871 | -1.29414 | -5.86642 |
| H  | -1.26449 | -2.77851 | -6.36334 |
| H  | 0.137589 | -2.13215 | -7.08169 |
| C  | 1.930677 | -1.06422 | -4.92394 |
| H  | 1.700528 | -0.80122 | -5.97005 |
| H  | 3.005707 | -0.90584 | -4.80454 |
| C  | 1.164696 | -0.12729 | -3.97957 |
| H  | 1.540053 | -0.28609 | -2.96671 |
| H  | 0.105426 | -0.38409 | -3.9602  |
| C  | 1.299955 | 1.32531  | -4.4018  |
| H  | 2.339244 | 1.650157 | -4.47325 |
| H  | 0.817404 | 1.489738 | -5.36807 |
| N  | 0.628442 | 2.237462 | -3.42785 |
| H  | 6.348714 | -6.07838 | 0.514341 |
| H  | 6.204013 | -7.17781 | 5.676313 |
| H  | -3.63848 | -6.79719 | 5.80959  |

|   |          |          |          |
|---|----------|----------|----------|
| H | 1.365511 | -7.70843 | 1.469037 |
| H | -8.01777 | -1.16746 | 2.984535 |
| H | -6.01572 | 2.506142 | 4.685893 |
| H | 10.3289  | -4.30924 | -1.03697 |
| H | 8.738801 | 1.263038 | -3.70791 |
| H | 4.678149 | 6.321155 | -4.83272 |
| H | 6.453239 | 5.751341 | -1.91475 |
| H | -1.12134 | 8.091465 | 4.681663 |
| H | -4.77022 | 0.130984 | -6.08653 |
| H | -4.90925 | -5.17656 | -5.81754 |
| H | -10.1488 | -1.01326 | -4.4269  |
| H | 6.11397  | -3.40023 | 3.179737 |
| H | 4.639903 | -3.23634 | 2.814367 |
| C | 4.205055 | -4.92841 | -2.5368  |
| O | 3.940839 | -4.6373  | -1.31957 |
| O | 4.477871 | -4.00831 | -3.35796 |
| C | 4.155571 | -6.37283 | -2.98386 |
| H | 4.596876 | -7.02552 | -2.22477 |
| H | 4.67418  | -6.50172 | -3.93589 |
| H | 3.107548 | -6.67086 | -3.10889 |
| H | 1.02683  | 3.190296 | -3.59835 |
| H | -0.40226 | 2.149606 | -3.56121 |
| H | 0.835095 | 1.971869 | -2.4385  |
| O | 1.04471  | 1.56049  | -0.67212 |
| H | 1.474373 | 0.729358 | -0.37562 |
| H | 0.165259 | 1.498446 | -0.21206 |
| O | -2.94904 | 0.336777 | -1.20708 |
| H | -2.64735 | 0.755914 | -2.04855 |
| H | -2.44358 | 0.775967 | -0.48342 |
| O | -1.21361 | 1.00907  | 0.789576 |
| H | -0.91977 | 0.181166 | 1.212696 |
| H | -1.09958 | 1.696394 | 1.527953 |

<sup>5</sup>IM1<sub>B,C3</sub>

|   |          |          |          |
|---|----------|----------|----------|
| C | -4.04663 | -1.656   | 5.659592 |
| H | -3.30301 | -1.40131 | 4.892529 |
| C | -3.32634 | -1.96876 | 6.975387 |
| H | -4.0546  | -2.02579 | 7.793086 |
| H | -2.86191 | -2.95462 | 6.900325 |
| C | -2.25428 | -0.93067 | 7.332055 |
| H | -2.68346 | 0.078948 | 7.387053 |
| H | -1.85582 | -1.14752 | 8.332902 |
| C | -1.06775 | -0.92795 | 6.363304 |
| O | -0.84478 | -1.89734 | 5.622288 |
| N | -0.2644  | 0.152085 | 6.390323 |
| H | -0.51827 | 0.966856 | 6.930119 |
| H | 0.4574   | 0.253585 | 5.664117 |
| C | -4.85442 | -2.82526 | 5.096988 |
| O | -4.65263 | -3.99994 | 5.430008 |
| N | -5.77945 | -2.48681 | 4.164686 |
| H | -5.84668 | -1.51507 | 3.871477 |
| C | -6.43813 | -3.48545 | 3.32466  |
| H | -7.31251 | -3.00211 | 2.876271 |
| C | -5.51609 | -4.0582  | 2.229716 |
| H | -4.72832 | -4.64932 | 2.713072 |
| H | -6.10576 | -4.75271 | 1.615355 |
| C | -4.87198 | -2.96487 | 1.36728  |
| H | -4.37267 | -2.24582 | 2.027115 |
| H | -5.6424  | -2.39811 | 0.826483 |
| C | -3.81333 | -3.44863 | 0.372651 |
| H | -3.2753  | -2.5791  | -0.01107 |
| H | -3.08545 | -4.09385 | 0.886565 |
| N | -4.41027 | -4.1716  | -0.75312 |
| H | -5.23429 | -4.75135 | -0.58874 |
| C | -3.92555 | -4.20256 | -2.00274 |
| N | -2.86767 | -3.48183 | -2.38915 |
| H | -2.49941 | -2.67836 | -1.85402 |
| H | -2.66703 | -3.51469 | -3.38751 |
| N | -4.50387 | -5.02253 | -2.90444 |
| H | -5.31488 | -5.55624 | -2.61291 |
| H | -4.32007 | -4.83851 | -3.89095 |
| C | 0.252255 | -8.06625 | 4.106209 |
| H | 1.095426 | -8.06094 | 4.807904 |
| H | 0.667822 | -7.95124 | 3.096208 |
| C | -0.72709 | -6.97984 | 4.425804 |
| N | -0.3548  | -5.64707 | 4.469004 |
| C | -1.45404 | -4.9751  | 4.781176 |
| H | -1.51877 | -3.90586 | 4.932457 |
| N | -2.51368 | -5.80055 | 4.938723 |

|   |          |          |          |
|---|----------|----------|----------|
| H | -3.44523 | -5.46514 | 5.181315 |
| C | -2.06797 | -7.08629 | 4.71543  |
| H | -2.72211 | -7.94286 | 4.779106 |
| C | 6.703623 | 5.21291  | -4.33953 |
| C | 6.264525 | 5.526156 | -2.90725 |
| C | 5.699018 | 4.412953 | -5.20532 |
| O | 6.997151 | 5.253652 | -1.94972 |
| C | 5.206523 | 3.170746 | -4.5236  |
| C | 5.79895  | 1.968321 | -4.22092 |
| N | 3.962298 | 3.139418 | -3.92457 |
| C | 3.836678 | 1.972787 | -3.28525 |
| N | 4.932714 | 1.224234 | -3.44353 |
| H | 6.934361 | 6.158403 | -4.84815 |
| H | 4.834912 | 5.03431  | -5.46503 |
| H | 6.194175 | 4.159149 | -6.14989 |
| H | 6.780426 | 1.601798 | -4.4788  |
| H | 2.984255 | 1.704561 | -2.68531 |
| H | 3.265622 | 3.96347  | -3.9417  |
| N | 5.079644 | 6.175342 | -2.74841 |
| H | 4.333513 | 6.114964 | -3.44516 |
| C | 4.650495 | 6.601385 | -1.42326 |
| H | 5.536988 | 6.923408 | -0.8694  |
| C | 3.900208 | 5.524703 | -0.62458 |
| O | 2.692267 | 5.642994 | -0.38889 |
| N | 4.652452 | 4.480788 | -0.20787 |
| C | 4.113036 | 3.314188 | 0.499722 |
| C | 3.218495 | 3.775331 | 1.678767 |
| C | 5.288184 | 2.485557 | 1.053892 |
| O | 3.689383 | 4.363587 | 2.64653  |
| C | 4.903638 | 1.085646 | 1.562389 |
| C | 4.759703 | 0.008725 | 0.490108 |
| O | 4.042456 | -1.00044 | 0.690391 |
| O | 5.463555 | 0.168251 | -0.57781 |
| H | 5.631546 | 4.480144 | -0.48877 |
| H | 3.519004 | 2.710478 | -0.19914 |
| H | 6.048322 | 2.372525 | 0.274105 |
| H | 5.72614  | 3.061866 | 1.875107 |
| H | 3.99225  | 1.098054 | 2.169684 |
| H | 5.706425 | 0.719668 | 2.216857 |
| N | 1.900805 | 3.461969 | 1.562031 |
| H | 1.591794 | 2.968072 | 0.735053 |
| C | 0.908072 | 3.749658 | 2.59473  |
| H | -0.05852 | 3.515798 | 2.135824 |
| C | 1.056732 | 2.808244 | 3.79492  |
| H | 2.062474 | 2.872615 | 4.216534 |
| H | 0.355486 | 3.117367 | 4.578014 |
| C | 0.754112 | 1.364857 | 3.376561 |

|   |          |          |          |
|---|----------|----------|----------|
| O | -0.06593 | 1.207662 | 2.432004 |
| O | 1.34807  | 0.439053 | 4.018537 |
| C | 0.820542 | 5.226416 | 3.014709 |
| O | 0.325874 | 5.530274 | 4.106654 |
| N | 1.169916 | 6.160971 | 2.094211 |
| H | 1.665777 | 5.871057 | 1.250836 |
| C | 1.226053 | 7.572156 | 2.476042 |
| H | 1.626286 | 7.632115 | 3.494266 |
| C | 2.136775 | 8.361095 | 1.530755 |
| H | 3.163413 | 7.987422 | 1.591737 |
| H | 2.120048 | 9.414227 | 1.821465 |
| H | 1.799726 | 8.274173 | 0.492266 |
| C | -0.15417 | 8.254214 | 2.581877 |
| O | -0.25129 | 9.368002 | 3.085822 |
| N | -1.21218 | 7.541256 | 2.103214 |
| H | -1.02083 | 6.647366 | 1.669176 |
| C | -2.59173 | 7.958988 | 2.265073 |
| H | -2.54715 | 9.004858 | 2.589193 |
| C | -3.38072 | 7.890694 | 0.935718 |
| H | -2.96598 | 8.652242 | 0.265648 |
| H | -4.41258 | 8.168657 | 1.166639 |
| C | -3.33686 | 6.53591  | 0.257323 |
| C | -2.34956 | 6.244457 | -0.69635 |
| H | -1.63053 | 7.01426  | -0.96955 |
| C | -2.27991 | 4.99016  | -1.30966 |
| H | -1.5021  | 4.797243 | -2.0458  |
| C | -3.21042 | 4.002465 | -0.97658 |
| H | -3.16624 | 3.02643  | -1.45293 |
| C | -4.2026  | 4.281012 | -0.03174 |
| H | -4.93529 | 3.519244 | 0.225774 |
| C | -4.26582 | 5.533917 | 0.581325 |
| H | -5.03479 | 5.747494 | 1.318446 |
| C | -3.33369 | 7.2031   | 3.397242 |
| O | -4.56275 | 7.269195 | 3.481179 |
| N | -2.54885 | 6.541289 | 4.280809 |
| H | -1.54456 | 6.490957 | 4.129955 |
| C | -3.07824 | 5.868219 | 5.457226 |
| H | -4.12266 | 6.171789 | 5.553508 |
| C | -2.93083 | 4.339523 | 5.393827 |
| H | -1.8622  | 4.112089 | 5.282222 |
| H | -3.24098 | 3.92808  | 6.367734 |
| C | -3.71513 | 3.631387 | 4.273135 |
| H | -3.4302  | 4.092521 | 3.317765 |
| C | -3.32374 | 2.14722  | 4.209024 |
| H | -3.90041 | 1.615738 | 3.443568 |
| H | -2.26442 | 2.011954 | 3.964502 |
| H | -3.51406 | 1.652957 | 5.174307 |

|   |          |          |          |
|---|----------|----------|----------|
| C | -5.23477 | 3.799311 | 4.431961 |
| H | -5.76738 | 3.274433 | 3.627058 |
| H | -5.57986 | 3.393139 | 5.395016 |
| H | -5.53277 | 4.850972 | 4.377689 |
| C | -5.54288 | 0.279676 | -4.78245 |
| H | -5.06657 | 0.08291  | -5.7443  |
| C | -4.54898 | -0.03776 | -3.65055 |
| H | -4.96226 | 0.242129 | -2.67769 |
| H | -4.35313 | -1.11919 | -3.6185  |
| C | -3.18841 | 0.662851 | -3.82185 |
| O | -2.72696 | 0.82446  | -4.99261 |
| O | -2.59138 | 1.016919 | -2.76632 |
| C | -6.84092 | -0.5042  | -4.6791  |
| O | -7.79347 | -0.10569 | -3.98154 |
| N | -6.89746 | -1.66547 | -5.37606 |
| H | -6.04867 | -2.00662 | -5.84305 |
| C | -8.13776 | -2.38595 | -5.62274 |
| H | -8.91813 | -1.66986 | -5.91545 |
| C | -8.7376  | -3.22427 | -4.48691 |
| O | -9.40653 | -4.22892 | -4.74557 |
| N | -8.54626 | -2.75576 | -3.2271  |
| H | -8.05832 | -1.86774 | -3.14225 |
| C | -9.31545 | -3.24047 | -2.0883  |
| H | -10.112  | -3.87015 | -2.50002 |
| C | -8.46394 | -4.06428 | -1.11131 |
| H | -9.09701 | -4.34086 | -0.26033 |
| H | -7.65209 | -3.44887 | -0.71107 |
| C | -7.82721 | -5.33148 | -1.66442 |
| O | -6.78267 | -5.7831  | -1.16028 |
| N | -8.45827 | -5.9843  | -2.66416 |
| H | -9.08426 | -5.50638 | -3.31511 |
| H | -7.99545 | -6.81616 | -3.00979 |
| C | -10.0533 | -2.11312 | -1.3214  |
| O | -10.5449 | -2.36172 | -0.22564 |
| N | -10.1529 | -0.91632 | -1.95622 |
| H | -9.67649 | -0.77068 | -2.83873 |
| C | -10.8376 | 0.23145  | -1.37566 |
| H | -11.2952 | -0.11282 | -0.44578 |
| C | -9.89394 | 1.426748 | -1.12002 |
| H | -9.3765  | 1.67504  | -2.05503 |
| H | -10.5216 | 2.290836 | -0.86732 |
| C | -8.88632 | 1.183815 | -0.01845 |
| C | -7.60295 | 0.694985 | -0.29986 |
| H | -7.31531 | 0.530096 | -1.3356  |
| C | -6.68338 | 0.444013 | 0.720195 |
| H | -5.67865 | 0.09654  | 0.500244 |
| C | -7.04892 | 0.676228 | 2.047099 |



|   |          |          |          |
|---|----------|----------|----------|
| O | -6.12429 | 0.383444 | 3.039245 |
| H | -6.25416 | 0.995773 | 3.782066 |
| C | -8.31804 | 1.171239 | 2.351779 |
| H | -8.59936 | 1.354879 | 3.386248 |
| C | -9.22112 | 1.423825 | 1.320491 |
| H | -10.2062 | 1.813975 | 1.566281 |
| C | 0.905739 | 6.893404 | -3.32956 |
| H | 1.122766 | 7.085437 | -2.27139 |
| H | -0.17132 | 6.98949  | -3.48664 |
| C | 1.379362 | 5.479291 | -3.6432  |
| O | 2.606671 | 5.355176 | -3.9875  |
| O | 0.561033 | 4.537733 | -3.5163  |
| C | 10.87671 | -1.35001 | -3.55858 |
| C | 9.564101 | -1.02394 | -2.92427 |
| C | 8.340196 | -0.70235 | -3.45595 |
| N | 9.377524 | -0.96385 | -1.55074 |
| C | 8.091481 | -0.62922 | -1.3069  |
| N | 7.430692 | -0.45738 | -2.44178 |
| H | 11.26197 | -2.3237  | -3.23008 |
| H | 10.76671 | -1.38557 | -4.64597 |
| H | 8.052303 | -0.64368 | -4.49535 |
| H | 7.673697 | -0.54454 | -0.31488 |
| H | 9.982824 | -1.33448 | -0.82275 |
| C | 5.46286  | -6.52621 | -0.73366 |
| H | 5.495274 | -6.79811 | -1.79823 |
| C | 4.314255 | -5.52801 | -0.50724 |
| H | 4.516648 | -4.58543 | -1.02958 |
| H | 3.41174  | -5.94298 | -0.97551 |
| C | 4.022143 | -5.2577  | 0.974287 |
| H | 3.697243 | -6.19211 | 1.455028 |
| H | 4.933042 | -4.93948 | 1.497831 |
| C | 2.947912 | -4.18041 | 1.148295 |
| H | 3.35348  | -3.21553 | 0.840364 |
| H | 2.085056 | -4.39994 | 0.499833 |
| N | 2.517633 | -4.09776 | 2.545499 |
| H | 2.247732 | -4.98009 | 2.966829 |
| C | 1.918437 | -3.01738 | 3.114828 |
| N | 2.033155 | -1.79221 | 2.582397 |
| H | 2.828774 | -1.5614  | 1.974974 |
| H | 1.688592 | -0.98421 | 3.156744 |
| N | 1.218504 | -3.21784 | 4.228575 |
| H | 0.869714 | -4.16835 | 4.422342 |
| H | 0.678977 | -2.45817 | 4.65642  |
| C | 6.869882 | -6.06955 | -0.35395 |
| O | 7.641742 | -6.82273 | 0.254452 |
| N | 7.256697 | -4.83475 | -0.77192 |
| H | 6.618996 | -4.22079 | -1.2874  |

|    |          |          |          |
|----|----------|----------|----------|
| C  | 8.664685 | -4.44988 | -0.76616 |
| H  | 9.268821 | -5.31137 | -1.07676 |
| C  | 9.201979 | -3.94357 | 0.585579 |
| O  | 9.596175 | -2.76897 | 0.731267 |
| N  | 9.244839 | -4.86348 | 1.561001 |
| H  | 8.848056 | -5.7778  | 1.332054 |
| C  | 9.807506 | -4.59577 | 2.884919 |
| H  | 10.62411 | -3.88072 | 2.750762 |
| C  | 8.80535  | -4.03486 | 3.907208 |
| H  | 9.361599 | -3.77181 | 4.815134 |
| H  | 8.382698 | -3.10511 | 3.513329 |
| C  | 7.687388 | -5.01501 | 4.274937 |
| H  | 7.091945 | -5.28965 | 3.395368 |
| H  | 8.111017 | -5.94412 | 4.67573  |
| S  | 6.564284 | -4.41437 | 5.59694  |
| C  | 5.614705 | -3.1304  | 4.704189 |
| H  | 4.968496 | -2.65266 | 5.445576 |
| H  | 6.262113 | -2.36934 | 4.260623 |
| H  | 4.981518 | -3.57894 | 3.931995 |
| O  | 3.443021 | -1.00435 | -2.04952 |
| O  | 7.381718 | -1.33543 | 1.931597 |
| Fe | 5.214868 | -0.55801 | -2.42904 |
| C  | -0.93162 | -2.16663 | -5.5273  |
| H  | -0.90693 | -3.00716 | -4.84181 |
| H  | 3.470574 | -1.35263 | -1.13023 |
| C  | -2.02833 | -2.20832 | -6.53214 |
| H  | -1.7281  | -2.75457 | -7.44482 |
| C  | -3.3607  | -2.89801 | -6.0401  |
| O  | -3.24072 | -3.83487 | -5.22472 |
| O  | -4.40066 | -2.41776 | -6.56967 |
| N  | -2.45982 | -0.83969 | -7.0062  |
| H  | -2.60883 | -0.16482 | -6.1681  |
| H  | -3.39569 | -1.01288 | -7.41369 |
| H  | -1.82362 | -0.41589 | -7.68288 |
| C  | 0.222381 | -1.21091 | -5.52947 |
| H  | 0.13996  | -0.5048  | -6.36749 |
| H  | 1.156899 | -1.76505 | -5.70685 |
| C  | 0.357947 | -0.41067 | -4.19226 |
| H  | 1.258696 | -0.72483 | -3.65412 |
| H  | -0.49066 | -0.63961 | -3.53938 |
| C  | 0.393488 | 1.102588 | -4.43696 |
| H  | 1.373553 | 1.434294 | -4.79218 |
| H  | -0.36764 | 1.389494 | -5.16446 |
| N  | 0.06941  | 1.860026 | -3.19189 |
| H  | 8.790555 | -3.64481 | -1.49013 |
| H  | 10.23752 | -5.53642 | 3.247587 |
| H  | -0.22315 | -9.05075 | 4.159098 |

|   |          |          |          |
|---|----------|----------|----------|
| H | 5.286201 | -7.45204 | -0.17775 |
| H | -6.79398 | -4.29404 | 3.96901  |
| H | -4.69203 | -0.77423 | 5.764228 |
| H | 11.64004 | -0.5977  | -3.32367 |
| H | 7.637497 | 4.653617 | -4.24209 |
| H | 1.444269 | 7.633015 | -3.929   |
| H | 3.966086 | 7.443706 | -1.53414 |
| H | -2.54129 | 6.239594 | 6.339792 |
| H | -5.81101 | 1.340024 | -4.74611 |
| H | -7.97892 | -3.06407 | -6.46255 |
| H | -11.6405 | 0.545417 | -2.05548 |
| H | 8.216914 | -1.74821 | 1.633437 |
| H | 6.684536 | -1.88951 | 1.547177 |
| C | 5.664108 | -2.8391  | -3.54788 |
| O | 5.755111 | -2.85425 | -2.2805  |
| O | 5.432411 | -1.74604 | -4.1538  |
| C | 5.79152  | -4.11606 | -4.34882 |
| H | 6.426936 | -4.84051 | -3.83262 |
| H | 6.18939  | -3.90592 | -5.34422 |
| H | 4.794834 | -4.55764 | -4.46948 |
| H | 0.280961 | 2.8842   | -3.31701 |
| H | -0.94864 | 1.71323  | -2.99017 |
| H | 0.621059 | 1.502794 | -2.37333 |
| O | 1.632686 | 0.892286 | -1.07355 |
| H | 2.260421 | 0.222543 | -1.43796 |
| H | 1.076145 | 0.382091 | -0.42653 |
| O | -1.98177 | -1.17348 | -1.1429  |
| H | -2.25753 | -0.32588 | -1.55461 |
| H | -1.25504 | -0.9789  | -0.50357 |
| O | 0.075414 | -0.6033  | 0.601262 |
| H | 0.616466 | -1.30022 | 1.016989 |
| H | -0.08725 | 0.043039 | 1.367617 |

<sup>5</sup>TS2<sub>B,C3</sub>

|   |          |          |          |
|---|----------|----------|----------|
| C | -5.41712 | 0.55378  | 5.302027 |
| H | -4.63827 | 0.90597  | 4.616709 |
| C | -4.78236 | 0.03613  | 6.601861 |
| H | -5.499   | 0.121514 | 7.425811 |
| H | -4.55999 | -1.02829 | 6.500211 |
| C | -3.49747 | 0.786796 | 6.972614 |
| H | -3.67049 | 1.871392 | 7.01047  |
| H | -3.17059 | 0.496376 | 7.980436 |
| C | -2.34225 | 0.504486 | 6.008023 |
| O | -2.44601 | -0.34104 | 5.107532 |
| N | -1.1985  | 1.191553 | 6.210736 |
| H | -1.17688 | 1.961684 | 6.864403 |
| H | -0.49108 | 1.174376 | 5.467961 |
| C | -6.2469  | -0.4934  | 4.556913 |
| O | -6.54861 | -1.58886 | 5.043471 |
| N | -6.62416 | -0.12128 | 3.305682 |
| H | -6.32986 | 0.788267 | 2.973082 |
| C | -7.43954 | -0.94848 | 2.418402 |
| H | -8.07755 | -0.27206 | 1.838614 |
| C | -6.63632 | -1.84323 | 1.456055 |
| H | -6.15303 | -2.63943 | 2.038144 |
| H | -7.3588  | -2.33733 | 0.795324 |
| C | -5.5843  | -1.07274 | 0.621407 |
| H | -5.81387 | -0.00104 | 0.615988 |
| H | -5.62845 | -1.37075 | -0.43197 |
| C | -4.13682 | -1.24422 | 1.11369  |
| H | -3.5173  | -0.4113  | 0.781615 |
| H | -4.09866 | -1.24663 | 2.208289 |
| N | -3.51016 | -2.4919  | 0.651451 |
| H | -3.8369  | -3.38267 | 1.030673 |
| C | -2.46031 | -2.5812  | -0.17172 |
| N | -1.95454 | -1.50821 | -0.81134 |
| H | -2.55593 | -0.7155  | -1.07469 |
| H | -1.1563  | -1.706   | -1.41539 |
| N | -1.8499  | -3.76404 | -0.34489 |
| H | -2.23643 | -4.58988 | 0.101206 |
| H | -1.13531 | -3.8262  | -1.06774 |
| C | -2.61571 | -6.61814 | 3.777354 |
| H | -1.65167 | -6.68011 | 4.294449 |
| H | -2.42402 | -6.6481  | 2.697056 |
| C | -3.34551 | -5.36681 | 4.154445 |
| N | -2.70635 | -4.14204 | 4.230635 |
| C | -3.64644 | -3.26214 | 4.542877 |
| H | -3.48704 | -2.20557 | 4.711209 |
| N | -4.85878 | -3.85303 | 4.670429 |

|   |          |          |          |
|---|----------|----------|----------|
| H | -5.7104  | -3.33615 | 4.884865 |
| C | -4.68414 | -5.19892 | 4.427346 |
| H | -5.50297 | -5.90166 | 4.462354 |
| C | 7.798006 | 4.200836 | -3.26345 |
| C | 7.179348 | 4.744327 | -1.97226 |
| C | 6.843    | 3.43298  | -4.2135  |
| O | 7.639449 | 4.431075 | -0.86943 |
| C | 6.094471 | 2.335491 | -3.52098 |
| C | 6.403927 | 1.036484 | -3.18897 |
| N | 4.864726 | 2.583152 | -2.94163 |
| C | 4.483512 | 1.472397 | -2.29105 |
| N | 5.387349 | 0.504535 | -2.41972 |
| H | 8.243685 | 5.038121 | -3.81617 |
| H | 6.119975 | 4.120524 | -4.66702 |
| H | 7.44163  | 3.018754 | -5.03236 |
| H | 7.278332 | 0.454857 | -3.4404  |
| H | 3.561864 | 1.388109 | -1.7408  |
| H | 4.304007 | 3.463018 | -3.10792 |
| N | 6.160188 | 5.639485 | -2.10645 |
| H | 5.53484  | 5.6002   | -2.91621 |
| C | 5.594548 | 6.284563 | -0.92778 |
| H | 6.405169 | 6.439566 | -0.21044 |
| C | 4.45666  | 5.491526 | -0.2714  |
| O | 3.293193 | 5.904188 | -0.30037 |
| N | 4.82453  | 4.327968 | 0.315673 |
| C | 3.850529 | 3.374314 | 0.845289 |
| C | 2.89601  | 4.082605 | 1.842104 |
| C | 4.593102 | 2.229112 | 1.561539 |
| O | 3.322147 | 4.622192 | 2.857127 |
| C | 3.718542 | 0.987569 | 1.863376 |
| C | 3.563924 | 0.052991 | 0.659353 |
| O | 2.431291 | -0.11177 | 0.109817 |
| O | 4.627687 | -0.52533 | 0.269259 |
| H | 5.808618 | 4.073007 | 0.268188 |
| H | 3.259976 | 2.98272  | 0.008202 |
| H | 5.451119 | 1.910214 | 0.957757 |
| H | 4.981091 | 2.637014 | 2.500826 |
| H | 2.737173 | 1.276185 | 2.252508 |
| H | 4.222707 | 0.401523 | 2.640532 |
| N | 1.582234 | 4.024815 | 1.499362 |
| H | 1.323729 | 3.525396 | 0.64867  |
| C | 0.5113   | 4.563056 | 2.329686 |
| H | -0.41197 | 4.403384 | 1.760114 |
| C | 0.325262 | 3.78066  | 3.640999 |
| H | 1.275922 | 3.675092 | 4.166029 |
| H | -0.36905 | 4.347941 | 4.269055 |
| C | -0.28151 | 2.417345 | 3.30507  |

|   |          |          |          |
|---|----------|----------|----------|
| O | -1.33813 | 2.437314 | 2.609926 |
| O | 0.312876 | 1.37087  | 3.716066 |
| C | 0.553599 | 6.083871 | 2.548842 |
| O | -0.11417 | 6.5935   | 3.455543 |
| N | 1.198904 | 6.830956 | 1.618582 |
| H | 1.843829 | 6.383623 | 0.966968 |
| C | 1.259375 | 8.282897 | 1.780501 |
| H | 1.539988 | 8.510757 | 2.814421 |
| C | 2.290089 | 8.896406 | 0.827201 |
| H | 3.288067 | 8.498321 | 1.031856 |
| H | 2.299949 | 9.980415 | 0.966551 |
| H | 2.043612 | 8.676634 | -0.21727 |
| C | -0.10305 | 8.984212 | 1.600176 |
| O | -0.26644 | 10.12053 | 2.02894  |
| N | -1.06252 | 8.281991 | 0.929132 |
| H | -0.82218 | 7.367453 | 0.569209 |
| C | -2.41532 | 8.774669 | 0.748504 |
| H | -2.38734 | 9.823379 | 1.064163 |
| C | -2.86612 | 8.730826 | -0.73275 |
| H | -2.23571 | 9.432852 | -1.28984 |
| H | -3.89269 | 9.106032 | -0.75713 |
| C | -2.79471 | 7.360764 | -1.37822 |
| C | -1.66265 | 6.973055 | -2.10959 |
| H | -0.83716 | 7.672588 | -2.22525 |
| C | -1.58172 | 5.714165 | -2.71168 |
| H | -0.68919 | 5.457693 | -3.27709 |
| C | -2.64479 | 4.817134 | -2.58362 |
| H | -2.6003  | 3.837416 | -3.05535 |
| C | -3.7807  | 5.185081 | -1.85544 |
| H | -4.61165 | 4.490135 | -1.75619 |
| C | -3.85502 | 6.446317 | -1.26014 |
| H | -4.73925 | 6.735027 | -0.6991  |
| C | -3.46441 | 8.095127 | 1.662338 |
| O | -4.66411 | 8.301328 | 1.461843 |
| N | -2.98697 | 7.327957 | 2.671037 |
| H | -1.9832  | 7.250772 | 2.814546 |
| C | -3.85512 | 6.740016 | 3.685325 |
| H | -4.80352 | 7.281141 | 3.650593 |
| C | -4.07896 | 5.225403 | 3.526333 |
| H | -3.10388 | 4.719726 | 3.539897 |
| H | -4.62236 | 4.878879 | 4.420633 |
| C | -4.84984 | 4.776293 | 2.269297 |
| H | -4.29066 | 5.128664 | 1.392087 |
| C | -4.89021 | 3.240027 | 2.20271  |
| H | -5.36462 | 2.898796 | 1.273643 |
| H | -3.88256 | 2.813016 | 2.260746 |
| H | -5.47359 | 2.846619 | 3.051094 |

|   |          |          |          |
|---|----------|----------|----------|
| C | -6.26688 | 5.36413  | 2.196929 |
| H | -6.80619 | 4.963965 | 1.329218 |
| H | -6.84637 | 5.104127 | 3.094845 |
| H | -6.24241 | 6.453119 | 2.098756 |
| C | -3.28016 | -1.86078 | -5.73499 |
| H | -2.41021 | -2.09588 | -6.35959 |
| C | -2.78874 | -1.22468 | -4.42219 |
| H | -3.62855 | -0.81205 | -3.86063 |
| H | -2.327   | -1.99442 | -3.79228 |
| C | -1.71294 | -0.14353 | -4.63196 |
| O | -0.77219 | -0.3968  | -5.4485  |
| O | -1.79498 | 0.912564 | -3.94147 |
| C | -4.10532 | -3.12805 | -5.54239 |
| O | -5.28023 | -3.22662 | -5.90207 |
| N | -3.44961 | -4.1768  | -4.94911 |
| H | -2.50529 | -4.0537  | -4.5848  |
| C | -4.00034 | -5.5177  | -4.96969 |
| H | -4.5858  | -5.6471  | -5.88745 |
| C | -4.92327 | -5.91037 | -3.81425 |
| O | -5.16268 | -7.09918 | -3.58627 |
| N | -5.47389 | -4.89112 | -3.1076  |
| H | -5.18407 | -3.94772 | -3.332   |
| C | -6.47768 | -5.10328 | -2.07416 |
| H | -6.81233 | -6.13952 | -2.19706 |
| C | -5.92686 | -4.89416 | -0.65714 |
| H | -6.75471 | -5.02675 | 0.047962 |
| H | -5.59729 | -3.85817 | -0.54301 |
| C | -4.77274 | -5.7753  | -0.19894 |
| O | -4.00627 | -5.37184 | 0.69486  |
| N | -4.65141 | -7.01001 | -0.72876 |
| H | -5.05904 | -7.26152 | -1.63    |
| H | -3.86471 | -7.56054 | -0.40796 |
| C | -7.74647 | -4.23313 | -2.26733 |
| O | -8.49329 | -4.04292 | -1.31044 |
| N | -7.97811 | -3.77948 | -3.52336 |
| H | -7.2979  | -3.96288 | -4.25211 |
| C | -9.18734 | -3.03787 | -3.87203 |
| H | -9.72798 | -2.88362 | -2.93605 |
| C | -8.90305 | -1.69747 | -4.57541 |
| H | -8.37791 | -1.8923  | -5.51927 |
| H | -9.87831 | -1.27088 | -4.84867 |
| C | -8.10387 | -0.71412 | -3.74756 |
| C | -6.79111 | -0.3837  | -4.1017  |
| H | -6.35849 | -0.82251 | -4.99818 |
| C | -6.02854 | 0.493432 | -3.32966 |
| H | -5.02585 | 0.770401 | -3.63887 |
| C | -6.55898 | 1.041389 | -2.15369 |

|   |          |          |          |
|---|----------|----------|----------|
| O | -5.82629 | 1.84187  | -1.33154 |
| H | -4.86577 | 1.662623 | -1.48997 |
| C | -7.88693 | 0.751422 | -1.80859 |
| H | -8.30646 | 1.203642 | -0.91458 |
| C | -8.64181 | -0.11116 | -2.60009 |
| H | -9.6677  | -0.32876 | -2.3092  |
| C | 2.688098 | 7.030858 | -3.79583 |
| H | 2.721191 | 7.367106 | -2.752   |
| H | 1.784885 | 7.426604 | -4.26534 |
| C | 2.68164  | 5.505428 | -3.79029 |
| O | 3.812213 | 4.935957 | -3.61585 |
| O | 1.574541 | 4.926908 | -3.92954 |
| C | 10.49329 | -3.09682 | 0.017739 |
| C | 9.097914 | -2.56294 | 0.005176 |
| C | 8.363848 | -1.93072 | -0.96733 |
| N | 8.260162 | -2.60149 | 1.110489 |
| C | 7.086401 | -2.01767 | 0.775139 |
| N | 7.113223 | -1.59712 | -0.48075 |
| H | 10.52603 | -4.15974 | 0.289689 |
| H | 10.94119 | -2.99371 | -0.97464 |
| H | 8.653694 | -1.69658 | -1.98143 |
| H | 6.256793 | -1.92513 | 1.461531 |
| H | 8.371796 | -3.1551  | 1.960608 |
| C | 3.475316 | -6.46408 | -0.30817 |
| H | 3.88116  | -6.617   | -1.31689 |
| C | 2.758914 | -5.09916 | -0.26791 |
| H | 3.471804 | -4.29564 | -0.4726  |
| H | 2.039713 | -5.06    | -1.09506 |
| C | 2.015102 | -4.83953 | 1.047665 |
| H | 1.157053 | -5.52201 | 1.128604 |
| H | 2.667307 | -5.05713 | 1.903226 |
| C | 1.52756  | -3.39231 | 1.158067 |
| H | 2.394421 | -2.72455 | 1.242192 |
| H | 0.980464 | -3.10406 | 0.254505 |
| N | 0.657498 | -3.25433 | 2.327315 |
| H | 0.603297 | -4.04213 | 2.964874 |
| C | 0.15638  | -2.09703 | 2.800153 |
| N | 0.385494 | -0.92614 | 2.185339 |
| H | 1.130799 | -0.84858 | 1.492965 |
| H | 0.213024 | -0.05694 | 2.740957 |
| N | -0.59183 | -2.14487 | 3.911516 |
| H | -1.11158 | -3.01614 | 4.104041 |
| H | -1.07319 | -1.2964  | 4.226179 |
| C | 4.618212 | -6.63116 | 0.691038 |
| O | 4.609755 | -7.53067 | 1.54548  |
| N | 5.647953 | -5.75456 | 0.574191 |
| H | 5.640168 | -5.05435 | -0.17548 |



|    |          |          |          |
|----|----------|----------|----------|
| C  | 6.895351 | -5.94071 | 1.304615 |
| H  | 7.179602 | -6.99992 | 1.270443 |
| C  | 6.852162 | -5.49787 | 2.781045 |
| O  | 7.476378 | -4.4944  | 3.187289 |
| N  | 6.134475 | -6.30421 | 3.576742 |
| H  | 5.588945 | -7.02105 | 3.088886 |
| C  | 6.002624 | -6.14397 | 5.023864 |
| H  | 6.938288 | -5.71587 | 5.394935 |
| C  | 4.820212 | -5.26366 | 5.470097 |
| H  | 4.777717 | -5.28473 | 6.566622 |
| H  | 5.017987 | -4.23075 | 5.168021 |
| C  | 3.483495 | -5.72205 | 4.884588 |
| H  | 3.524196 | -5.68807 | 3.791549 |
| H  | 3.268842 | -6.76011 | 5.166054 |
| S  | 2.006249 | -4.78574 | 5.462524 |
| C  | 2.581944 | -3.04766 | 5.38973  |
| H  | 1.682776 | -2.43085 | 5.458479 |
| H  | 3.242709 | -2.8145  | 6.228378 |
| H  | 3.100633 | -2.82921 | 4.4527   |
| O  | 3.380625 | -1.97812 | -1.95074 |
| O  | 5.700914 | -2.34494 | 3.713825 |
| Fe | 5.177602 | -1.43057 | -1.52388 |
| C  | 2.619504 | -2.08062 | -4.12741 |
| H  | 3.585032 | -2.56468 | -4.19752 |
| H  | 2.698348 | -1.50544 | -1.42919 |
| C  | 1.44562  | -2.98871 | -4.35625 |
| H  | 1.827728 | -3.99976 | -4.53255 |
| C  | 0.242395 | -3.21216 | -3.33741 |
| O  | 0.331615 | -2.8072  | -2.16218 |
| O  | -0.70317 | -3.84352 | -3.88547 |
| N  | 0.686945 | -2.62463 | -5.63589 |
| H  | 0.125486 | -1.69837 | -5.55829 |
| H  | -0.03336 | -3.36046 | -5.69432 |
| H  | 1.278539 | -2.61261 | -6.46966 |
| C  | 2.590255 | -0.6257  | -4.45944 |
| H  | 2.312689 | -0.5029  | -5.52367 |
| H  | 3.606807 | -0.23428 | -4.36595 |
| C  | 1.624559 | 0.221935 | -3.62155 |
| H  | 1.979225 | 0.248526 | -2.58984 |
| H  | 0.63406  | -0.23008 | -3.60404 |
| C  | 1.517164 | 1.624416 | -4.20274 |
| H  | 2.481651 | 2.136838 | -4.22513 |
| H  | 1.122835 | 1.581566 | -5.22086 |
| N  | 0.586644 | 2.480522 | -3.41285 |
| H  | 7.664951 | -5.35175 | 0.805403 |
| H  | 5.904035 | -7.15126 | 5.44421  |
| H  | -3.20019 | -7.50757 | 4.035028 |

|   |          |          |          |
|---|----------|----------|----------|
| H | 2.774057 | -7.27952 | -0.10622 |
| H | -8.08684 | -1.56369 | 3.048792 |
| H | -6.05984 | 1.421255 | 5.506377 |
| H | 11.13056 | -2.55632 | 0.728948 |
| H | 8.607737 | 3.539903 | -2.94454 |
| H | 3.577257 | 7.418287 | -4.30295 |
| H | 5.179604 | 7.250445 | -1.22103 |
| H | -3.39621 | 6.929425 | 4.663258 |
| H | -3.90142 | -1.1573  | -6.29498 |
| H | -3.18563 | -6.24573 | -4.98457 |
| H | -9.81656 | -3.66213 | -4.52124 |
| H | 6.357138 | -3.07148 | 3.672779 |
| H | 6.085497 | -1.69676 | 4.323251 |
| C | 6.044349 | -3.6229  | -2.6827  |
| O | 5.617545 | -3.80973 | -1.50677 |
| O | 6.009615 | -2.46321 | -3.20915 |
| C | 6.648317 | -4.76892 | -3.47059 |
| H | 6.227898 | -5.7266  | -3.15278 |
| H | 7.729063 | -4.79265 | -3.2845  |
| H | 6.497253 | -4.62395 | -4.54317 |
| H | 0.836808 | 3.489044 | -3.62156 |
| H | -0.38394 | 2.207539 | -3.6556  |
| H | 0.716348 | 2.333573 | -2.38353 |
| O | 0.881253 | 2.062476 | -0.63818 |
| H | 1.448297 | 1.311904 | -0.33959 |
| H | -0.01762 | 1.817028 | -0.28737 |
| O | -3.23921 | 0.947526 | -1.60892 |
| H | -2.76102 | 1.023759 | -2.47637 |
| H | -2.63611 | 1.303288 | -0.91128 |
| O | -1.43931 | 1.169666 | 0.412121 |
| H | -1.22491 | 0.23341  | 0.57533  |
| H | -1.47207 | 1.613297 | 1.334048 |

<sup>5</sup>Pr<sub>B,C3</sub>

|   |          |          |          |
|---|----------|----------|----------|
| C | -5.33027 | 1.024229 | 5.407975 |
| H | -4.55063 | 1.293079 | 4.686792 |
| C | -4.69151 | 0.476422 | 6.693456 |
| H | -5.36673 | 0.635304 | 7.541215 |
| H | -4.5634  | -0.60464 | 6.604478 |
| C | -3.33539 | 1.122432 | 7.003088 |
| H | -3.41548 | 2.218457 | 7.020999 |
| H | -2.99878 | 0.826937 | 8.006132 |
| C | -2.24236 | 0.726661 | 6.00622  |
| O | -2.45729 | -0.09607 | 5.104663 |
| N | -1.02855 | 1.291308 | 6.180003 |
| H | -0.90786 | 2.048321 | 6.838122 |
| H | -0.34617 | 1.202579 | 5.419546 |
| C | -6.27482 | 0.039789 | 4.715733 |
| O | -6.63667 | -1.02534 | 5.227595 |
| N | -6.68262 | 0.431454 | 3.479864 |
| H | -6.32783 | 1.308578 | 3.120683 |
| C | -7.58419 | -0.34577 | 2.632613 |
| H | -8.20242 | 0.365706 | 2.073781 |
| C | -6.87126 | -1.29336 | 1.649408 |
| H | -6.40309 | -2.10311 | 2.224837 |
| H | -7.64503 | -1.76035 | 1.027564 |
| C | -5.81939 | -0.58699 | 0.757946 |
| H | -5.93663 | 0.500982 | 0.822488 |
| H | -5.98458 | -0.82469 | -0.29826 |
| C | -4.36029 | -0.92365 | 1.110198 |
| H | -3.68759 | -0.1456  | 0.748071 |
| H | -4.22703 | -0.97554 | 2.19701  |
| N | -3.9184  | -2.20674 | 0.544739 |
| H | -4.33959 | -3.07197 | 0.892088 |
| C | -2.89319 | -2.37382 | -0.29908 |
| N | -2.28837 | -1.35114 | -0.91537 |
| H | -2.75694 | -0.46293 | -1.12517 |
| H | -1.38648 | -1.54947 | -1.36512 |
| N | -2.41341 | -3.61545 | -0.52337 |
| H | -2.8719  | -4.39383 | -0.06069 |
| H | -1.89751 | -3.76665 | -1.39119 |
| C | -3.15921 | -6.32157 | 3.755032 |
| H | -2.18235 | -6.4622  | 4.230971 |
| H | -3.01379 | -6.35124 | 2.66737  |
| C | -3.77711 | -5.02505 | 4.177054 |
| N | -3.04278 | -3.85503 | 4.253347 |
| C | -3.90091 | -2.91195 | 4.612573 |
| H | -3.65516 | -1.87318 | 4.787975 |
| N | -5.15056 | -3.41052 | 4.771361 |

|   |          |          |          |
|---|----------|----------|----------|
| H | -5.95213 | -2.83356 | 5.021944 |
| C | -5.08899 | -4.76065 | 4.498716 |
| H | -5.95802 | -5.39915 | 4.550166 |
| C | 8.200662 | 3.728746 | -3.2036  |
| C | 7.585203 | 4.273847 | -1.91228 |
| C | 7.220674 | 3.038154 | -4.18672 |
| O | 8.000857 | 3.908941 | -0.80785 |
| C | 6.395279 | 1.975901 | -3.52768 |
| C | 6.627488 | 0.659181 | -3.20118 |
| N | 5.165816 | 2.280231 | -2.97752 |
| C | 4.710655 | 1.180071 | -2.35309 |
| N | 5.564372 | 0.167253 | -2.46867 |
| H | 8.703221 | 4.552553 | -3.72706 |
| H | 6.549719 | 3.776592 | -4.64042 |
| H | 7.809082 | 2.603794 | -5.0026  |
| H | 7.482721 | 0.040968 | -3.43267 |
| H | 3.772725 | 1.139852 | -1.82631 |
| H | 4.65963  | 3.189188 | -3.13255 |
| N | 6.619396 | 5.226855 | -2.04591 |
| H | 6.010215 | 5.241454 | -2.86879 |
| C | 6.063326 | 5.871103 | -0.86291 |
| H | 6.86319  | 5.956191 | -0.12213 |
| C | 4.863003 | 5.133422 | -0.25529 |
| O | 3.731041 | 5.626126 | -0.28915 |
| N | 5.137745 | 3.92825  | 0.297211 |
| C | 4.090345 | 3.038244 | 0.799613 |
| C | 3.200413 | 3.794365 | 1.823231 |
| C | 4.742375 | 1.813249 | 1.4713   |
| O | 3.673883 | 4.262603 | 2.852897 |
| C | 3.774853 | 0.637829 | 1.760475 |
| C | 3.518894 | -0.25895 | 0.544055 |
| O | 2.39296  | -0.26025 | -0.0319  |
| O | 4.497156 | -0.99084 | 0.176021 |
| H | 6.104372 | 3.611495 | 0.270491 |
| H | 3.468571 | 2.724972 | -0.04756 |
| H | 5.563666 | 1.444    | 0.84508  |
| H | 5.176893 | 2.160784 | 2.414644 |
| H | 2.826124 | 1.000755 | 2.168436 |
| H | 4.240539 | -0.0004  | 2.519789 |
| N | 1.888131 | 3.870479 | 1.479547 |
| H | 1.58296  | 3.413803 | 0.619581 |
| C | 0.86849  | 4.488113 | 2.318579 |
| H | -0.06136 | 4.429189 | 1.740301 |
| C | 0.598081 | 3.695792 | 3.60843  |
| H | 1.52981  | 3.491429 | 4.138365 |
| H | -0.04978 | 4.307507 | 4.244285 |
| C | -0.12295 | 2.402034 | 3.227984 |

|   |          |          |          |
|---|----------|----------|----------|
| O | -1.16256 | 2.534854 | 2.520019 |
| O | 0.372219 | 1.296451 | 3.615151 |
| C | 1.047281 | 5.992842 | 2.573305 |
| O | 0.425452 | 6.54021  | 3.491067 |
| N | 1.756926 | 6.699184 | 1.658939 |
| H | 2.356384 | 6.21092  | 0.993029 |
| C | 1.932056 | 8.138772 | 1.841823 |
| H | 2.226245 | 8.329194 | 2.879482 |
| C | 3.011021 | 8.682204 | 0.899428 |
| H | 3.974731 | 8.206838 | 1.103784 |
| H | 3.103501 | 9.760674 | 1.050979 |
| H | 2.753548 | 8.492934 | -0.14831 |
| C | 0.629135 | 8.947395 | 1.669304 |
| O | 0.553415 | 10.08689 | 2.113688 |
| N | -0.38085 | 8.331381 | 0.987236 |
| H | -0.21085 | 7.40691  | 0.613023 |
| C | -1.69072 | 8.930218 | 0.812292 |
| H | -1.58347 | 9.966385 | 1.151717 |
| C | -2.13622 | 8.95495  | -0.67094 |
| H | -1.45333 | 9.621853 | -1.20892 |
| H | -3.13242 | 9.404996 | -0.68958 |
| C | -2.16158 | 7.599295 | -1.34963 |
| C | -1.06043 | 7.152561 | -2.09415 |
| H | -0.18894 | 7.796114 | -2.19563 |
| C | -1.06704 | 5.906031 | -2.72659 |
| H | -0.19497 | 5.603773 | -3.30125 |
| C | -2.18875 | 5.081189 | -2.61545 |
| H | -2.21418 | 4.111423 | -3.10864 |
| C | -3.29539 | 5.508636 | -1.87505 |
| H | -4.17164 | 4.869544 | -1.79109 |
| C | -3.28235 | 6.757358 | -1.24989 |
| H | -4.1442  | 7.092868 | -0.68006 |
| C | -2.7937  | 8.314194 | 1.707354 |
| O | -3.97328 | 8.613866 | 1.505123 |
| N | -2.38229 | 7.494665 | 2.704022 |
| H | -1.38798 | 7.341253 | 2.852621 |
| C | -3.29862 | 6.963302 | 3.707247 |
| H | -4.19722 | 7.584262 | 3.684803 |
| C | -3.65233 | 5.476901 | 3.520611 |
| H | -2.72464 | 4.888902 | 3.519209 |
| H | -4.22069 | 5.161566 | 4.411018 |
| C | -4.46388 | 5.118494 | 2.259949 |
| H | -3.87807 | 5.433801 | 1.385969 |
| C | -4.64003 | 3.593061 | 2.170101 |
| H | -5.14929 | 3.3087   | 1.240167 |
| H | -3.67415 | 3.077433 | 2.21453  |
| H | -5.25172 | 3.239006 | 3.015994 |

|   |          |          |          |
|---|----------|----------|----------|
| C | -5.82365 | 5.830411 | 2.203245 |
| H | -6.40029 | 5.491988 | 1.333163 |
| H | -6.42039 | 5.610187 | 3.100519 |
| H | -5.70278 | 6.914083 | 2.119793 |
| C | -3.12437 | -1.82935 | -5.90109 |
| H | -2.15983 | -2.21261 | -6.25322 |
| C | -2.88169 | -0.90508 | -4.69562 |
| H | -3.7217  | -0.21972 | -4.57618 |
| H | -2.81482 | -1.49146 | -3.76941 |
| C | -1.58908 | -0.06905 | -4.75554 |
| O | -0.60854 | -0.51559 | -5.43662 |
| O | -1.57345 | 0.994125 | -4.07889 |
| C | -4.04537 | -3.0087  | -5.61531 |
| O | -5.15152 | -3.14667 | -6.13368 |
| N | -3.55149 | -3.95259 | -4.73998 |
| H | -2.64387 | -3.80822 | -4.30045 |
| C | -4.12041 | -5.28822 | -4.71048 |
| H | -4.50426 | -5.53824 | -5.70617 |
| C | -5.27038 | -5.55966 | -3.73837 |
| O | -5.63793 | -6.72106 | -3.54372 |
| N | -5.84977 | -4.48453 | -3.14556 |
| H | -5.43675 | -3.57356 | -3.30571 |
| C | -6.95685 | -4.62009 | -2.20521 |
| H | -7.34556 | -5.63267 | -2.35997 |
| C | -6.51834 | -4.43916 | -0.74526 |
| H | -7.40991 | -4.52274 | -0.11415 |
| H | -6.14131 | -3.42325 | -0.60106 |
| C | -5.46056 | -5.38909 | -0.2015  |
| O | -4.68033 | -5.00723 | 0.689176 |
| N | -5.4437  | -6.66237 | -0.65187 |
| H | -5.8131  | -6.91222 | -1.56855 |
| H | -4.71576 | -7.25718 | -0.27543 |
| C | -8.14365 | -3.66764 | -2.50152 |
| O | -8.90724 | -3.35781 | -1.59208 |
| N | -8.29398 | -3.28598 | -3.79401 |
| H | -7.59739 | -3.5706  | -4.47237 |
| C | -9.39344 | -2.42917 | -4.22952 |
| H | -9.98761 | -2.22436 | -3.33677 |
| C | -8.92681 | -1.11339 | -4.88872 |
| H | -8.3587  | -1.35601 | -5.79717 |
| H | -9.82905 | -0.5841  | -5.22084 |
| C | -8.09577 | -0.22812 | -3.98793 |
| C | -6.71182 | -0.41701 | -3.89772 |
| H | -6.23691 | -1.16732 | -4.5272  |
| C | -5.92731 | 0.355636 | -3.04517 |
| H | -4.86155 | 0.185801 | -2.97044 |
| C | -6.50499 | 1.374995 | -2.27468 |

|   |          |          |          |
|---|----------|----------|----------|
| O | -5.76355 | 2.163138 | -1.45188 |
| H | -4.80798 | 1.934941 | -1.55966 |
| C | -7.88921 | 1.581153 | -2.35699 |
| H | -8.33865 | 2.374727 | -1.7676  |
| C | -8.66414 | 0.78288  | -3.1983  |
| H | -9.73676 | 0.960239 | -3.24895 |
| C | 3.336442 | 6.916722 | -3.78451 |
| H | 3.360011 | 7.237284 | -2.73542 |
| H | 2.492065 | 7.400674 | -4.2803  |
| C | 3.186848 | 5.398016 | -3.80265 |
| O | 4.252252 | 4.720714 | -3.61501 |
| O | 2.030443 | 4.933035 | -3.97399 |
| C | 10.28381 | -4.03525 | 0.155089 |
| C | 8.958266 | -3.34823 | 0.096138 |
| C | 8.353476 | -2.59884 | -0.88336 |
| N | 8.060185 | -3.33731 | 1.152594 |
| C | 6.97679  | -2.61411 | 0.781317 |
| N | 7.120789 | -2.14805 | -0.44968 |
| H | 10.1855  | -5.10562 | 0.377882 |
| H | 10.79481 | -3.9422  | -0.80741 |
| H | 8.72903  | -2.35375 | -1.86679 |
| H | 6.120992 | -2.46037 | 1.423549 |
| H | 8.071109 | -3.91769 | 1.991812 |
| C | 2.832119 | -6.83347 | -0.2627  |
| H | 3.208785 | -7.06457 | -1.26821 |
| C | 2.231123 | -5.41323 | -0.27324 |
| H | 3.004562 | -4.68345 | -0.53313 |
| H | 1.488516 | -5.36843 | -1.08184 |
| C | 1.550402 | -5.02979 | 1.045918 |
| H | 0.663563 | -5.66065 | 1.199901 |
| H | 2.225849 | -5.22721 | 1.887892 |
| C | 1.141554 | -3.55488 | 1.081595 |
| H | 2.044315 | -2.93017 | 1.085756 |
| H | 0.565582 | -3.28705 | 0.18952  |
| N | 0.336777 | -3.29772 | 2.276144 |
| H | 0.223114 | -4.05671 | 2.940593 |
| C | -0.06298 | -2.08755 | 2.707943 |
| N | 0.245003 | -0.9596  | 2.044268 |
| H | 0.989785 | -0.96483 | 1.347354 |
| H | 0.1689   | -0.07294 | 2.595786 |
| N | -0.79269 | -2.03373 | 3.830557 |
| H | -1.37802 | -2.8523  | 4.062593 |
| H | -1.18513 | -1.13814 | 4.136399 |
| C | 3.970715 | -7.06526 | 0.730544 |
| O | 3.907154 | -7.96235 | 1.585275 |
| N | 5.053515 | -6.25889 | 0.604189 |
| H | 5.084997 | -5.55089 | -0.14018 |

|    |          |          |          |
|----|----------|----------|----------|
| C  | 6.291997 | -6.52281 | 1.32681  |
| H  | 6.506825 | -7.59831 | 1.294396 |
| C  | 6.290187 | -6.07271 | 2.801581 |
| O  | 7.001304 | -5.12707 | 3.202293 |
| N  | 5.504878 | -6.80754 | 3.60284  |
| H  | 4.906424 | -7.48615 | 3.122688 |
| C  | 5.382973 | -6.61871 | 5.047369 |
| H  | 6.352768 | -6.27547 | 5.419025 |
| C  | 4.286542 | -5.62493 | 5.475142 |
| H  | 4.237696 | -5.62563 | 6.571595 |
| H  | 4.581915 | -4.61984 | 5.15913  |
| C  | 2.915569 | -5.96538 | 4.888383 |
| H  | 2.965736 | -5.95533 | 3.795338 |
| H  | 2.602588 | -6.97343 | 5.186379 |
| S  | 1.528873 | -4.8843  | 5.437924 |
| C  | 2.267023 | -3.20921 | 5.350097 |
| H  | 1.429139 | -2.50959 | 5.396879 |
| H  | 2.935014 | -3.0276  | 6.195719 |
| H  | 2.817121 | -3.05401 | 4.41851  |
| O  | 2.992665 | -2.15826 | -2.39156 |
| O  | 5.424038 | -2.81164 | 3.687766 |
| Fe | 5.238325 | -1.7538  | -1.54322 |
| C  | 2.577744 | -2.14526 | -3.75476 |
| H  | 3.376938 | -2.68329 | -4.2768  |
| H  | 2.288263 | -1.76671 | -1.82817 |
| C  | 1.29297  | -3.01083 | -3.91299 |
| H  | 1.59688  | -4.062   | -3.85868 |
| C  | 0.110694 | -2.85783 | -2.91014 |
| O  | 0.269709 | -2.1255  | -1.90976 |
| O  | -0.91607 | -3.53175 | -3.2243  |
| N  | 0.639159 | -2.8275  | -5.26474 |
| H  | 0.125637 | -1.85848 | -5.3505  |
| H  | -0.10445 | -3.53241 | -5.31233 |
| H  | 1.286376 | -2.95036 | -6.04772 |
| C  | 2.53351  | -0.72843 | -4.34176 |
| H  | 2.193557 | -0.76515 | -5.38634 |
| H  | 3.571446 | -0.37854 | -4.37127 |
| C  | 1.67735  | 0.262855 | -3.56126 |
| H  | 2.029228 | 0.322904 | -2.52986 |
| H  | 0.643272 | -0.06935 | -3.51548 |
| C  | 1.710318 | 1.637701 | -4.20718 |
| H  | 2.71284  | 2.071496 | -4.22505 |
| H  | 1.334916 | 1.590479 | -5.23242 |
| N  | 0.835407 | 2.590063 | -3.46139 |
| H  | 7.093557 | -5.98569 | 0.819463 |
| H  | 5.188062 | -7.607   | 5.478935 |
| H  | -3.7975  | -7.16883 | 4.026868 |



|   |          |          |          |
|---|----------|----------|----------|
| H | 2.066166 | -7.57641 | -0.02063 |
| H | -8.24188 | -0.9161  | 3.293618 |
| H | -5.88675 | 1.948212 | 5.617574 |
| H | 10.93657 | -3.59936 | 0.922088 |
| H | 8.9652   | 3.015469 | -2.88601 |
| H | 4.276114 | 7.225673 | -4.25284 |
| H | 5.714603 | 6.868412 | -1.13668 |
| H | -2.82509 | 7.093592 | 4.687803 |
| H | -3.57049 | -1.27095 | -6.72746 |
| H | -3.33543 | -6.00937 | -4.46691 |
| H | -10.0227 | -2.98644 | -4.9362  |
| H | 6.014654 | -3.59194 | 3.646564 |
| H | 5.872178 | -2.19304 | 4.284392 |
| C | 5.604597 | -4.14784 | -2.56628 |
| O | 5.163467 | -4.24964 | -1.38961 |
| O | 5.732251 | -3.00798 | -3.12967 |
| C | 6.042128 | -5.37874 | -3.33953 |
| H | 5.57325  | -6.28272 | -2.94258 |
| H | 7.129795 | -5.48458 | -3.24681 |
| H | 5.813755 | -5.26796 | -4.40294 |
| H | 1.176854 | 3.57249  | -3.6748  |
| H | -0.14223 | 2.393263 | -3.72826 |
| H | 0.91746  | 2.436795 | -2.42845 |
| O | 1.001738 | 2.055546 | -0.68236 |
| H | 1.519915 | 1.255433 | -0.42375 |
| H | 0.088349 | 1.843661 | -0.35244 |
| O | -3.13153 | 1.277661 | -1.7391  |
| H | -2.63344 | 1.287846 | -2.59491 |
| H | -2.49895 | 1.531273 | -1.02293 |
| O | -1.38532 | 1.255085 | 0.335567 |
| H | -1.22374 | 0.312799 | 0.522372 |
| H | -1.38067 | 1.715676 | 1.24953  |

<sup>5</sup>TS1<sub>B,C4</sub>

|   |          |          |          |
|---|----------|----------|----------|
| C | -3.61334 | -2.5395  | 6.160456 |
| H | -3.18056 | -1.99238 | 5.312639 |
| C | -2.48222 | -3.14711 | 6.997092 |
| H | -2.86833 | -3.45897 | 7.974374 |
| H | -2.12647 | -4.05253 | 6.50064  |
| C | -1.30341 | -2.1892  | 7.20488  |
| H | -1.63036 | -1.25514 | 7.681778 |
| H | -0.57885 | -2.64431 | 7.894233 |
| C | -0.55741 | -1.85529 | 5.908905 |
| O | -0.71364 | -2.53168 | 4.878563 |
| N | 0.281725 | -0.80722 | 5.951465 |
| H | 0.384416 | -0.2523  | 6.788525 |
| H | 0.789391 | -0.52715 | 5.100909 |
| C | -4.55472 | -3.58028 | 5.553718 |
| O | -4.29246 | -4.78964 | 5.536442 |
| N | -5.68172 | -3.07576 | 4.988283 |
| H | -5.78646 | -2.06659 | 4.94426  |
| C | -6.52762 | -3.87937 | 4.103932 |
| H | -7.48231 | -3.35388 | 3.999738 |
| C | -5.87953 | -4.11589 | 2.725347 |
| H | -4.95594 | -4.68394 | 2.880782 |
| H | -6.54326 | -4.75511 | 2.127928 |
| C | -5.56523 | -2.80035 | 1.99546  |
| H | -5.26702 | -2.05073 | 2.734059 |
| H | -6.46348 | -2.39762 | 1.511602 |
| C | -4.41224 | -2.85145 | 0.995418 |
| H | -4.20234 | -1.83341 | 0.661503 |
| H | -3.50829 | -3.23687 | 1.49069  |
| N | -4.71439 | -3.67871 | -0.17554 |
| H | -5.32115 | -4.49398 | -0.0723  |
| C | -4.04766 | -3.60237 | -1.33651 |
| N | -3.19442 | -2.6082  | -1.60494 |
| H | -3.1736  | -1.7114  | -1.08226 |
| H | -2.79109 | -2.63239 | -2.53958 |
| N | -4.21832 | -4.57384 | -2.25588 |
| H | -4.90257 | -5.29883 | -2.06916 |
| H | -3.89137 | -4.38355 | -3.20388 |
| C | -1.7582  | -7.04996 | 0.135693 |
| H | -0.75056 | -7.46741 | 0.018058 |
| H | -1.88478 | -6.27334 | -0.62927 |
| C | -1.96371 | -6.50318 | 1.514408 |
| N | -1.13308 | -5.53174 | 2.052005 |
| C | -1.60337 | -5.28971 | 3.271603 |
| H | -1.21359 | -4.56388 | 3.975117 |
| N | -2.6856  | -6.05318 | 3.546577 |

|   |          |          |          |
|---|----------|----------|----------|
| H | -3.28596 | -5.91178 | 4.361102 |
| C | -2.93314 | -6.82939 | 2.432825 |
| H | -3.74954 | -7.53465 | 2.393523 |
| C | 6.713325 | 4.328035 | -5.35761 |
| C | 6.606652 | 4.666879 | -3.86827 |
| C | 5.427224 | 3.810527 | -6.05181 |
| O | 7.408653 | 4.183452 | -3.05935 |
| C | 4.758171 | 2.688618 | -5.31395 |
| C | 4.982487 | 1.332162 | -5.22904 |
| N | 3.744721 | 2.954997 | -4.41861 |
| C | 3.40113  | 1.803215 | -3.83028 |
| N | 4.120612 | 0.783806 | -4.29825 |
| H | 7.066326 | 5.219561 | -5.89313 |
| H | 4.705355 | 4.626736 | -6.17122 |
| H | 5.700372 | 3.488626 | -7.06334 |
| H | 5.707165 | 0.728143 | -5.75405 |
| H | 2.665714 | 1.724005 | -3.0506  |
| H | 3.293731 | 3.91917  | -4.28657 |
| N | 5.65339  | 5.560191 | -3.49343 |
| H | 4.816315 | 5.725063 | -4.05523 |
| C | 5.534017 | 5.97996  | -2.10175 |
| H | 6.542337 | 6.10393  | -1.6958  |
| C | 4.733907 | 5.009238 | -1.216   |
| O | 3.629405 | 5.325608 | -0.76055 |
| N | 5.338479 | 3.823022 | -0.9837  |
| C | 4.719757 | 2.706864 | -0.26595 |
| C | 4.111545 | 3.194506 | 1.072672 |
| C | 5.808882 | 1.657826 | 0.016564 |
| O | 4.814485 | 3.666851 | 1.960418 |
| C | 5.291447 | 0.325005 | 0.572359 |
| C | 4.737706 | -0.69266 | -0.43191 |
| O | 4.461976 | -1.84275 | -0.00948 |
| O | 4.638    | -0.31351 | -1.64845 |
| H | 6.232563 | 3.671295 | -1.44906 |
| H | 3.933907 | 2.266255 | -0.89027 |
| H | 6.364305 | 1.4681   | -0.90882 |
| H | 6.49944  | 2.103247 | 0.740779 |
| H | 4.513385 | 0.485572 | 1.331071 |
| H | 6.101221 | -0.19419 | 1.099949 |
| N | 2.763854 | 3.045549 | 1.173269 |
| H | 2.26742  | 2.559834 | 0.42909  |
| C | 2.004989 | 3.404836 | 2.366783 |
| H | 0.951893 | 3.38752  | 2.061628 |
| C | 2.123718 | 2.359567 | 3.484673 |
| H | 3.159295 | 2.037365 | 3.614759 |
| H | 1.80472  | 2.827208 | 4.42339  |
| C | 1.211038 | 1.162866 | 3.202183 |

|   |          |          |          |
|---|----------|----------|----------|
| O | 0.099082 | 1.411072 | 2.661721 |
| O | 1.616534 | 0.001696 | 3.544144 |
| C | 2.232502 | 4.837969 | 2.875656 |
| O | 1.986815 | 5.121924 | 4.053455 |
| N | 2.541143 | 5.789423 | 1.956683 |
| H | 2.866283 | 5.505023 | 1.032057 |
| C | 2.868364 | 7.140356 | 2.413973 |
| H | 3.497028 | 7.060439 | 3.307676 |
| C | 3.626894 | 7.918998 | 1.334641 |
| H | 4.57622  | 7.426574 | 1.105102 |
| H | 3.825663 | 8.928618 | 1.702641 |
| H | 3.044293 | 7.987355 | 0.409671 |
| C | 1.64869  | 7.952634 | 2.890917 |
| O | 1.813268 | 8.982974 | 3.534636 |
| N | 0.421861 | 7.463152 | 2.546868 |
| H | 0.387559 | 6.622064 | 1.985603 |
| C | -0.81526 | 8.046037 | 3.029743 |
| H | -0.51881 | 8.978436 | 3.523335 |
| C | -1.79124 | 8.40393  | 1.882788 |
| H | -1.31392 | 9.183108 | 1.278052 |
| H | -2.67972 | 8.836576 | 2.350375 |
| C | -2.18643 | 7.240052 | 0.995797 |
| C | -1.4725  | 6.953595 | -0.17714 |
| H | -0.63188 | 7.58477  | -0.4574  |
| C | -1.83511 | 5.884484 | -1.00175 |
| H | -1.2631  | 5.693842 | -1.90714 |
| C | -2.92508 | 5.079121 | -0.66329 |
| H | -3.22287 | 4.249737 | -1.30056 |
| C | -3.64164 | 5.351382 | 0.505953 |
| H | -4.49387 | 4.732274 | 0.775796 |
| C | -3.2776  | 6.419617 | 1.326992 |
| H | -3.83563 | 6.629088 | 2.234927 |
| C | -1.51967 | 7.202687 | 4.120787 |
| O | -2.67918 | 7.472089 | 4.445468 |
| N | -0.78019 | 6.224663 | 4.696106 |
| H | 0.182724 | 6.077728 | 4.402431 |
| C | -1.2588  | 5.440533 | 5.828154 |
| H | -2.11008 | 5.976019 | 6.254225 |
| C | -1.63559 | 3.991689 | 5.471881 |
| H | -0.75795 | 3.505216 | 5.025184 |
| H | -1.84179 | 3.461163 | 6.415324 |
| C | -2.83743 | 3.815679 | 4.523866 |
| H | -2.61323 | 4.360089 | 3.59645  |
| C | -3.00034 | 2.331138 | 4.15404  |
| H | -3.80328 | 2.219072 | 3.411329 |
| H | -2.08117 | 1.917346 | 3.725379 |
| H | -3.26313 | 1.737367 | 5.043811 |

|   |          |          |          |
|---|----------|----------|----------|
| C | -4.13971 | 4.38672  | 5.104686 |
| H | -4.98488 | 4.183715 | 4.434677 |
| H | -4.37271 | 3.928142 | 6.076373 |
| H | -4.07492 | 5.470699 | 5.235451 |
| C | -5.80722 | 0.629602 | -4.67936 |
| H | -5.10642 | 0.381801 | -5.47895 |
| C | -5.0365  | 0.659337 | -3.34893 |
| H | -5.63481 | 1.112308 | -2.55369 |
| H | -4.81188 | -0.36723 | -3.02277 |
| C | -3.68129 | 1.384017 | -3.43585 |
| O | -3.10474 | 1.433146 | -4.56303 |
| O | -3.20648 | 1.833725 | -2.35088 |
| C | -6.95799 | -0.36121 | -4.6637  |
| O | -8.10279 | -0.05166 | -4.31254 |
| N | -6.63706 | -1.63836 | -5.03304 |
| H | -5.67709 | -1.84295 | -5.33084 |
| C | -7.66677 | -2.60747 | -5.36169 |
| H | -8.45536 | -2.13196 | -5.95843 |
| C | -8.39868 | -3.28921 | -4.2052  |
| O | -9.21072 | -4.18881 | -4.43971 |
| N | -8.13076 | -2.8418  | -2.95287 |
| H | -7.42747 | -2.12241 | -2.85057 |
| C | -8.95689 | -3.20127 | -1.80886 |
| H | -9.8206  | -3.73064 | -2.22529 |
| C | -8.21931 | -4.1074  | -0.812   |
| H | -8.9221  | -4.38399 | -0.01847 |
| H | -7.41683 | -3.54237 | -0.33208 |
| C | -7.58993 | -5.37221 | -1.37655 |
| O | -6.5418  | -5.82637 | -0.88037 |
| N | -8.22903 | -6.01138 | -2.37954 |
| H | -8.8772  | -5.52786 | -3.00301 |
| H | -7.7667  | -6.83223 | -2.75073 |
| C | -9.5345  | -1.98172 | -1.04877 |
| O | -10.0282 | -2.1603  | 0.062076 |
| N | -9.47616 | -0.78571 | -1.68274 |
| H | -9.10667 | -0.71583 | -2.62881 |
| C | -10.0542 | 0.420976 | -1.09967 |
| H | -10.7002 | 0.099241 | -0.28025 |
| C | -9.01106 | 1.446129 | -0.61475 |
| H | -8.35249 | 1.695541 | -1.45601 |
| H | -9.56138 | 2.36881  | -0.37746 |
| C | -8.17103 | 1.03931  | 0.583468 |
| C | -6.77583 | 1.142822 | 0.546458 |
| H | -6.28365 | 1.474721 | -0.36445 |
| C | -5.98253 | 0.8373   | 1.655116 |
| H | -4.89985 | 0.889253 | 1.569269 |
| C | -6.59351 | 0.429248 | 2.842381 |

|   |          |          |          |
|---|----------|----------|----------|
| O | -5.86532 | 0.095896 | 3.97068  |
| H | -4.98473 | 0.503192 | 3.904075 |
| C | -7.98412 | 0.307183 | 2.904896 |
| H | -8.44801 | -0.00965 | 3.8343   |
| C | -8.75644 | 0.607544 | 1.784674 |
| H | -9.83567 | 0.505013 | 1.855137 |
| C | 1.486136 | 7.025459 | -3.12897 |
| H | 1.866819 | 7.09579  | -2.1025  |
| H | 0.411631 | 7.226532 | -3.11619 |
| C | 1.779483 | 5.616468 | -3.63043 |
| O | 2.902027 | 5.439252 | -4.21544 |
| O | 0.941141 | 4.703306 | -3.42645 |
| C | 8.363683 | -2.77783 | -6.29801 |
| C | 7.445744 | -2.37552 | -5.19136 |
| C | 6.148926 | -1.93534 | -5.18501 |
| N | 7.817571 | -2.38273 | -3.85406 |
| C | 6.77853  | -1.95896 | -3.10025 |
| N | 5.750134 | -1.67451 | -3.88443 |
| H | 8.715007 | -3.81096 | -6.18291 |
| H | 7.842148 | -2.70927 | -7.2564  |
| H | 5.469147 | -1.80402 | -6.01254 |
| H | 6.808687 | -1.94398 | -2.01996 |
| H | 8.707942 | -2.68102 | -3.48068 |
| C | 5.525972 | -6.94226 | 0.461444 |
| H | 6.206649 | -7.30467 | -0.32277 |
| C | 4.624077 | -5.8505  | -0.1377  |
| H | 5.216303 | -4.9905  | -0.46941 |
| H | 4.174445 | -6.26384 | -1.05101 |
| C | 3.499455 | -5.37971 | 0.795284 |
| H | 2.963112 | -6.24907 | 1.200739 |
| H | 3.918249 | -4.84115 | 1.655204 |
| C | 2.509118 | -4.47275 | 0.048678 |
| H | 3.012185 | -3.58556 | -0.3418  |
| H | 2.105276 | -5.00125 | -0.82145 |
| N | 1.360701 | -4.06065 | 0.858735 |
| H | 0.603335 | -4.73013 | 1.022057 |
| C | 1.274542 | -2.95211 | 1.601191 |
| N | 2.264114 | -2.08997 | 1.783213 |
| H | 3.145649 | -2.14313 | 1.264311 |
| H | 2.066443 | -1.24662 | 2.345618 |
| N | 0.050119 | -2.66972 | 2.153172 |
| H | -0.6062  | -3.44403 | 2.075861 |
| H | 0.038137 | -2.26029 | 3.095143 |
| C | 6.404231 | -6.59716 | 1.665424 |
| O | 6.502901 | -7.36665 | 2.618386 |
| N | 7.131515 | -5.4373  | 1.583167 |
| H | 7.056699 | -4.81869 | 0.77426  |

|    |          |          |          |
|----|----------|----------|----------|
| C  | 8.181327 | -5.18638 | 2.547534 |
| H  | 8.02081  | -5.88841 | 3.369497 |
| C  | 8.256063 | -3.74006 | 3.037595 |
| O  | 8.110685 | -2.76405 | 2.291549 |
| N  | 8.596562 | -3.59828 | 4.340181 |
| H  | 8.645907 | -4.42739 | 4.914325 |
| C  | 8.889922 | -2.29836 | 4.951764 |
| H  | 9.556278 | -1.75386 | 4.274972 |
| C  | 7.645017 | -1.4425  | 5.229417 |
| H  | 7.973842 | -0.46808 | 5.609818 |
| H  | 7.149468 | -1.25563 | 4.2726   |
| C  | 6.665873 | -2.07256 | 6.224309 |
| H  | 6.419363 | -3.10192 | 5.937604 |
| H  | 7.103736 | -2.10999 | 7.228908 |
| S  | 5.100023 | -1.1309  | 6.405788 |
| C  | 4.301255 | -1.54318 | 4.814742 |
| H  | 3.42691  | -0.89856 | 4.697045 |
| H  | 4.973997 | -1.34817 | 3.974339 |
| H  | 3.985869 | -2.59132 | 4.79274  |
| O  | 2.252254 | -0.71581 | -2.74733 |
| O  | 6.99251  | -3.08793 | -0.21047 |
| Fe | 3.888069 | -1.12004 | -3.30064 |
| C  | -0.28927 | -1.82096 | -4.72955 |
| H  | 0.467247 | -2.46788 | -5.18121 |
| H  | -0.65224 | -2.33814 | -3.83604 |
| C  | -1.49403 | -1.74496 | -5.72327 |
| H  | -1.21293 | -2.24993 | -6.65386 |
| C  | -2.83558 | -2.42046 | -5.25366 |
| O  | -2.74475 | -3.29441 | -4.36383 |
| O  | -3.85121 | -2.00145 | -5.87064 |
| N  | -1.91929 | -0.36103 | -6.16815 |
| H  | -2.2864  | 0.284807 | -5.4009  |
| H  | -2.76609 | -0.5441  | -6.73088 |
| H  | -1.20836 | 0.132618 | -6.71196 |
| C  | 0.358852 | -0.51148 | -4.34615 |
| H  | 0.896938 | -0.00453 | -5.15388 |
| H  | 1.476449 | -0.76247 | -3.55852 |
| C  | -0.40458 | 0.378753 | -3.3912  |
| H  | -0.10297 | 0.142389 | -2.36503 |
| H  | -1.47458 | 0.159093 | -3.42418 |
| C  | -0.18703 | 1.866809 | -3.65768 |
| H  | 0.838133 | 2.099854 | -3.93551 |
| H  | -0.85444 | 2.222863 | -4.44322 |
| N  | -0.49447 | 2.669378 | -2.43883 |
| H  | 9.171561 | -5.41244 | 2.117091 |
| H  | 9.442343 | -2.4995  | 5.876139 |
| H  | -2.47759 | -7.84685 | -0.07721 |

|   |          |          |          |
|---|----------|----------|----------|
| H | 4.925224 | -7.80107 | 0.776172 |
| H | -6.71976 | -4.83582 | 4.597117 |
| H | -4.19273 | -1.80929 | 6.740729 |
| H | 9.247122 | -2.12917 | -6.35226 |
| H | 7.498554 | 3.570806 | -5.42367 |
| H | 2.000976 | 7.775165 | -3.73594 |
| H | 5.011507 | 6.936886 | -2.07517 |
| H | -0.46258 | 5.422938 | 6.582254 |
| H | -6.23033 | 1.616523 | -4.88724 |
| H | -7.22165 | -3.39481 | -5.97517 |
| H | -10.6856 | 0.896246 | -1.85945 |
| H | 7.470505 | -2.82358 | 0.609002 |
| H | 6.067885 | -2.79638 | -0.05238 |
| C | 3.198122 | -3.35503 | -4.23492 |
| O | 3.131964 | -2.22724 | -4.85453 |
| O | 3.604919 | -3.39664 | -3.04999 |
| C | 2.826644 | -4.61841 | -4.98166 |
| H | 2.433635 | -5.36592 | -4.28879 |
| H | 3.730161 | -5.0295  | -5.44825 |
| H | 2.100988 | -4.41448 | -5.77277 |
| H | -0.17074 | 3.647484 | -2.61483 |
| H | -1.51965 | 2.585685 | -2.25717 |
| H | 0.058333 | 2.276878 | -1.65018 |
| O | 1.30946  | 1.149043 | -0.73698 |
| H | 1.760214 | 0.501769 | -1.32587 |
| H | 0.698696 | 0.604154 | -0.17318 |
| O | -3.14138 | -0.12051 | -0.32406 |
| H | -3.23587 | 0.633176 | -0.95053 |
| H | -2.24316 | -0.03654 | 0.085656 |
| O | -0.61303 | -0.15446 | 0.731311 |
| H | -0.47099 | -1.06887 | 1.058232 |
| H | -0.45675 | 0.413455 | 1.555698 |



<sup>5</sup>IM1<sub>B,C4</sub>

|   |          |          |          |
|---|----------|----------|----------|
| C | -3.28379 | -2.40628 | 5.699482 |
| H | -2.77307 | -2.0332  | 4.801688 |
| C | -2.25826 | -3.07493 | 6.620197 |
| H | -2.72478 | -3.31163 | 7.58374  |
| H | -1.95481 | -4.02875 | 6.182362 |
| C | -1.01619 | -2.2106  | 6.867671 |
| H | -1.294   | -1.24046 | 7.301336 |
| H | -0.37269 | -2.70271 | 7.610098 |
| C | -0.16585 | -1.97433 | 5.615318 |
| O | -0.27485 | -2.69662 | 4.611276 |
| N | 0.722141 | -0.96791 | 5.680611 |
| H | 0.756082 | -0.35823 | 6.484564 |
| H | 1.265124 | -0.7091  | 4.845835 |
| C | -4.38082 | -3.35326 | 5.214618 |
| O | -4.2714  | -4.58542 | 5.2697   |
| N | -5.47009 | -2.74832 | 4.676049 |
| H | -5.45586 | -1.73977 | 4.549994 |
| C | -6.4744  | -3.49068 | 3.913783 |
| H | -7.32911 | -2.81998 | 3.779227 |
| C | -5.95629 | -3.98953 | 2.549244 |
| H | -5.22219 | -4.78303 | 2.726171 |
| H | -6.79643 | -4.44618 | 2.00836  |
| C | -5.30363 | -2.87327 | 1.722905 |
| H | -4.6124  | -2.3196  | 2.36819  |
| H | -6.05804 | -2.1478  | 1.391002 |
| C | -4.47923 | -3.33585 | 0.521712 |
| H | -3.91372 | -2.48091 | 0.142276 |
| H | -3.75736 | -4.10483 | 0.8319   |
| N | -5.32647 | -3.8558  | -0.55413 |
| H | -6.20519 | -4.32226 | -0.32289 |
| C | -4.98098 | -3.87562 | -1.84784 |
| N | -3.86585 | -3.29439 | -2.30186 |
| H | -3.34393 | -2.57805 | -1.77554 |
| H | -3.76478 | -3.30391 | -3.31619 |
| N | -5.76145 | -4.53566 | -2.72799 |
| H | -6.60763 | -4.97236 | -2.38117 |
| H | -5.65509 | -4.30434 | -3.71562 |
| C | -1.391   | -7.21084 | 0.138314 |
| H | -0.42283 | -7.72493 | 0.192672 |
| H | -1.32273 | -6.46676 | -0.6652  |
| C | -1.74388 | -6.57016 | 1.444763 |
| N | -0.96189 | -5.57564 | 2.008213 |
| C | -1.55579 | -5.24806 | 3.147584 |
| H | -1.21852 | -4.48292 | 3.835936 |
| N | -2.67499 | -5.98064 | 3.352279 |

|   |          |          |          |
|---|----------|----------|----------|
| H | -3.33162 | -5.80181 | 4.113071 |
| C | -2.81435 | -6.82662 | 2.270414 |
| H | -3.63119 | -7.5279  | 2.188894 |
| C | 7.244425 | 4.329601 | -4.99709 |
| C | 6.763805 | 4.773101 | -3.61268 |
| C | 6.234604 | 3.572394 | -5.89265 |
| O | 7.472491 | 4.5683   | -2.6172  |
| C | 5.587122 | 2.403363 | -5.2087  |
| C | 6.034967 | 1.165473 | -4.81092 |
| N | 4.292577 | 2.497106 | -4.74459 |
| C | 3.996124 | 1.370819 | -4.08684 |
| N | 5.031189 | 0.526933 | -4.10484 |
| H | 7.593667 | 5.220413 | -5.53694 |
| H | 5.44684  | 4.250432 | -6.23864 |
| H | 6.769865 | 3.240182 | -6.79026 |
| H | 6.994433 | 0.697377 | -4.97181 |
| H | 3.062298 | 1.192446 | -3.58304 |
| H | 3.695464 | 3.369497 | -4.8407  |
| N | 5.591825 | 5.452127 | -3.53603 |
| H | 4.874795 | 5.398711 | -4.26382 |
| C | 5.132056 | 6.015407 | -2.27142 |
| H | 5.999768 | 6.422931 | -1.74311 |
| C | 4.398686 | 5.017473 | -1.3575  |
| O | 3.200385 | 5.156288 | -1.08929 |
| N | 5.174547 | 4.018785 | -0.88103 |
| C | 4.674253 | 2.886208 | -0.10213 |
| C | 3.77191  | 3.377377 | 1.051841 |
| C | 5.879096 | 2.146112 | 0.507756 |
| O | 4.22923  | 4.063457 | 1.96268  |
| C | 5.551036 | 0.749482 | 1.052153 |
| C | 5.476438 | -0.3686  | 0.013304 |
| O | 5.32648  | -1.55512 | 0.388912 |
| O | 5.626368 | -0.01424 | -1.21272 |
| H | 6.142985 | 4.006939 | -1.20001 |
| H | 4.110046 | 2.214417 | -0.76033 |
| H | 6.662763 | 2.057441 | -0.25244 |
| H | 6.264729 | 2.775125 | 1.316358 |
| H | 4.603029 | 0.741577 | 1.607843 |
| H | 6.310613 | 0.441662 | 1.781483 |
| N | 2.475364 | 2.97737  | 0.9992   |
| H | 2.168241 | 2.350806 | 0.255394 |
| C | 1.54718  | 3.266449 | 2.09007  |
| H | 0.545665 | 3.048377 | 1.701983 |
| C | 1.767875 | 2.325179 | 3.281725 |
| H | 2.814137 | 2.337381 | 3.594196 |
| H | 1.166422 | 2.681989 | 4.124545 |
| C | 1.318019 | 0.907177 | 2.918369 |

|   |          |          |          |
|---|----------|----------|----------|
| O | 0.23882  | 0.807046 | 2.281959 |
| O | 2.052541 | -0.06626 | 3.304939 |
| C | 1.525696 | 4.745973 | 2.513615 |
| O | 1.247438 | 5.059914 | 3.674212 |
| N | 1.675594 | 5.678336 | 1.529248 |
| H | 2.083798 | 5.376911 | 0.644547 |
| C | 1.884807 | 7.080027 | 1.906143 |
| H | 2.584587 | 7.115247 | 2.749096 |
| C | 2.469571 | 7.876422 | 0.735041 |
| H | 3.443561 | 7.47367  | 0.445535 |
| H | 2.58589  | 8.918891 | 1.041311 |
| H | 1.809825 | 7.837125 | -0.13911 |
| C | 0.623528 | 7.791294 | 2.4317   |
| O | 0.725224 | 8.869479 | 3.007386 |
| N | -0.56545 | 7.167075 | 2.19803  |
| H | -0.54706 | 6.286911 | 1.698848 |
| C | -1.82848 | 7.655581 | 2.717669 |
| H | -1.63055 | 8.678669 | 3.056525 |
| C | -2.92427 | 7.703545 | 1.625101 |
| H | -2.63061 | 8.462959 | 0.891808 |
| H | -3.84322 | 8.039128 | 2.112961 |
| C | -3.14608 | 6.37541  | 0.931134 |
| C | -2.45241 | 6.056437 | -0.2462  |
| H | -1.78818 | 6.795339 | -0.68981 |
| C | -2.60473 | 4.807657 | -0.85347 |
| H | -2.05619 | 4.577328 | -1.76357 |
| C | -3.46005 | 3.855008 | -0.29721 |
| H | -3.55568 | 2.880738 | -0.76728 |
| C | -4.16994 | 4.168178 | 0.865096 |
| H | -4.84731 | 3.437452 | 1.299809 |
| C | -4.01412 | 5.414503 | 1.474302 |
| H | -4.55644 | 5.651382 | 2.385233 |
| C | -2.32655 | 6.894836 | 3.972474 |
| O | -3.48573 | 7.053768 | 4.365803 |
| N | -1.41118 | 6.12217  | 4.602426 |
| H | -0.47909 | 6.015411 | 4.208147 |
| C | -1.68397 | 5.452811 | 5.86611  |
| H | -2.64806 | 5.82509  | 6.218371 |
| C | -1.67147 | 3.918973 | 5.761551 |
| H | -0.68303 | 3.612815 | 5.39364  |
| H | -1.76426 | 3.512065 | 6.780976 |
| C | -2.75605 | 3.287753 | 4.867682 |
| H | -2.6684  | 3.730667 | 3.8664   |
| C | -2.51338 | 1.775896 | 4.7327   |
| H | -3.29995 | 1.299864 | 4.135601 |
| H | -1.5582  | 1.559242 | 4.241512 |
| H | -2.50597 | 1.293442 | 5.722234 |

|   |          |          |          |
|---|----------|----------|----------|
| C | -4.17514 | 3.579477 | 5.381387 |
| H | -4.92473 | 3.099154 | 4.737275 |
| H | -4.31243 | 3.200509 | 6.405079 |
| H | -4.39341 | 4.6521   | 5.380881 |
| C | -5.9501  | 1.020445 | -4.34458 |
| H | -5.53253 | 0.609634 | -5.26323 |
| C | -4.99049 | 0.754404 | -3.17426 |
| H | -5.3238  | 1.273845 | -2.27124 |
| H | -4.98141 | -0.31861 | -2.93022 |
| C | -3.5315  | 1.159101 | -3.45728 |
| O | -3.14761 | 1.27514  | -4.65977 |
| O | -2.78768 | 1.32184  | -2.44829 |
| C | -7.33703 | 0.451178 | -4.10841 |
| O | -8.12174 | 0.957464 | -3.28457 |
| N | -7.65969 | -0.64891 | -4.83365 |
| H | -6.93709 | -1.08095 | -5.42219 |
| C | -9.02029 | -1.15186 | -4.95445 |
| H | -9.70163 | -0.31038 | -5.14229 |
| C | -9.63125 | -1.92558 | -3.77914 |
| O | -10.5188 | -2.75809 | -3.9876  |
| N | -9.19821 | -1.59105 | -2.53691 |
| H | -8.52958 | -0.82916 | -2.47909 |
| C | -9.92303 | -1.97137 | -1.33022 |
| H | -10.8776 | -2.39254 | -1.6636  |
| C | -9.16764 | -3.01275 | -0.49218 |
| H | -9.74236 | -3.1887  | 0.424457 |
| H | -8.19822 | -2.60957 | -0.18219 |
| C | -8.89827 | -4.35878 | -1.14921 |
| O | -7.94118 | -5.06105 | -0.77311 |
| N | -9.75428 | -4.79502 | -2.09752 |
| H | -10.3197 | -4.15385 | -2.65785 |
| H | -9.5325  | -5.69025 | -2.51582 |
| C | -10.3093 | -0.7671  | -0.43328 |
| O | -10.7567 | -0.98685 | 0.687853 |
| N | -10.1662 | 0.469221 | -0.97527 |
| H | -9.75952 | 0.581762 | -1.89798 |
| C | -10.5079 | 1.686212 | -0.24967 |
| H | -11.0053 | 1.37546  | 0.671463 |
| C | -9.27977 | 2.570832 | 0.056254 |
| H | -8.74637 | 2.767425 | -0.88186 |
| H | -9.65455 | 3.538373 | 0.414373 |
| C | -8.33182 | 1.982039 | 1.078193 |
| C | -7.19304 | 1.263965 | 0.689239 |
| H | -6.97608 | 1.14943  | -0.37014 |
| C | -6.31675 | 0.720293 | 1.630893 |
| H | -5.41305 | 0.204521 | 1.322887 |
| C | -6.58656 | 0.878541 | 2.991373 |

|   |          |          |          |
|---|----------|----------|----------|
| O | -5.71121 | 0.308364 | 3.903848 |
| H | -5.72809 | 0.833528 | 4.720638 |
| C | -7.71561 | 1.588871 | 3.404459 |
| H | -7.92461 | 1.713997 | 4.464651 |
| C | -8.57121 | 2.136979 | 2.450047 |
| H | -9.44104 | 2.698096 | 2.783703 |
| C | 1.2565   | 6.009844 | -3.91045 |
| H | 1.519063 | 6.188777 | -2.86067 |
| H | 0.173655 | 5.869327 | -3.97541 |
| C | 1.995221 | 4.757139 | -4.36151 |
| O | 3.143026 | 4.904581 | -4.89989 |
| O | 1.474249 | 3.628497 | -4.15878 |
| C | 10.19031 | -2.84616 | -4.60567 |
| C | 9.082869 | -2.16226 | -3.8746  |
| C | 7.722153 | -2.22037 | -4.00354 |
| N | 9.301357 | -1.26466 | -2.83547 |
| C | 8.111893 | -0.83218 | -2.37313 |
| N | 7.129868 | -1.38749 | -3.06777 |
| H | 10.79355 | -3.47349 | -3.93743 |
| H | 9.775758 | -3.4929  | -5.3834  |
| H | 7.116451 | -2.79805 | -4.68201 |
| H | 7.984611 | -0.14297 | -1.55667 |
| H | 10.19643 | -1.03432 | -2.42724 |
| C | 6.771388 | -6.42683 | -0.29687 |
| H | 7.61219  | -6.38405 | -1.00359 |
| C | 5.774938 | -5.30815 | -0.64645 |
| H | 6.274894 | -4.33425 | -0.62306 |
| H | 5.459637 | -5.45899 | -1.68885 |
| C | 4.53469  | -5.27046 | 0.256158 |
| H | 4.083617 | -6.27104 | 0.318009 |
| H | 4.822575 | -4.99208 | 1.277597 |
| C | 3.496586 | -4.27001 | -0.26867 |
| H | 3.935492 | -3.27455 | -0.36135 |
| H | 3.162315 | -4.55102 | -1.27367 |
| N | 2.302794 | -4.17774 | 0.572721 |
| H | 1.618353 | -4.91985 | 0.50055  |
| C | 2.003096 | -3.20028 | 1.447181 |
| N | 2.845273 | -2.23008 | 1.773567 |
| H | 3.762123 | -2.12316 | 1.334723 |
| H | 2.48847  | -1.42965 | 2.334514 |
| N | 0.746722 | -3.19586 | 1.963042 |
| H | 0.19351  | -4.05845 | 1.840703 |
| H | 0.594762 | -2.74795 | 2.874534 |
| C | 7.35524  | -6.42527 | 1.116802 |
| O | 7.339973 | -7.43531 | 1.817583 |
| N | 7.931677 | -5.25856 | 1.540747 |
| H | 8.000822 | -4.44633 | 0.922745 |

|    |          |          |          |
|----|----------|----------|----------|
| C  | 8.657575 | -5.261   | 2.792776 |
| H  | 8.154877 | -5.96001 | 3.467427 |
| C  | 8.80132  | -3.87662 | 3.419571 |
| O  | 8.921177 | -2.838   | 2.761496 |
| N  | 8.882371 | -3.87567 | 4.772594 |
| H  | 8.736808 | -4.74565 | 5.264034 |
| C  | 9.192773 | -2.66961 | 5.545397 |
| H  | 10.02692 | -2.1617  | 5.050825 |
| C  | 8.014812 | -1.69196 | 5.678277 |
| H  | 8.37152  | -0.79014 | 6.190271 |
| H  | 7.718168 | -1.3869  | 4.670583 |
| C  | 6.815435 | -2.26565 | 6.437887 |
| H  | 6.505026 | -3.22798 | 6.013092 |
| H  | 7.071676 | -2.44092 | 7.489668 |
| S  | 5.356549 | -1.15094 | 6.469364 |
| C  | 4.790838 | -1.32549 | 4.741095 |
| H  | 3.948285 | -0.64695 | 4.586764 |
| H  | 5.579043 | -1.05487 | 4.032413 |
| H  | 4.457945 | -2.34897 | 4.541105 |
| O  | 3.434767 | -0.99734 | -2.22026 |
| O  | 8.005312 | -2.62581 | 0.149503 |
| Fe | 5.142517 | -1.08871 | -2.76309 |
| C  | -2.04491 | -1.99215 | -4.97949 |
| H  | -1.9731  | -3.07241 | -4.77504 |
| H  | -2.51653 | -1.54812 | -4.09669 |
| C  | -3.01248 | -1.87665 | -6.1674  |
| H  | -2.64774 | -2.46352 | -7.01841 |
| C  | -4.46634 | -2.3529  | -5.82066 |
| O  | -4.55199 | -3.35569 | -5.07877 |
| O  | -5.38542 | -1.65861 | -6.3384  |
| N  | -3.15589 | -0.45704 | -6.64824 |
| H  | -3.20941 | 0.239038 | -5.82414 |
| H  | -4.07923 | -0.43978 | -7.1153  |
| H  | -2.40078 | -0.16341 | -7.26976 |
| C  | -0.68471 | -1.39018 | -5.14695 |
| H  | -0.08529 | -1.65986 | -6.01612 |
| H  | 2.964107 | -1.75763 | -2.64383 |
| C  | -0.05981 | -0.60783 | -4.02983 |
| H  | 0.945399 | -0.98914 | -3.80749 |
| H  | -0.66159 | -0.74616 | -3.12265 |
| C  | 0.025169 | 0.907075 | -4.33504 |
| H  | 0.944943 | 1.176838 | -4.85639 |
| H  | -0.83058 | 1.228026 | -4.92929 |
| N  | -0.03468 | 1.726045 | -3.08378 |
| H  | 9.681486 | -5.65134 | 2.658777 |
| H  | 9.538694 | -3.00154 | 6.530485 |
| H  | -2.14477 | -7.94932 | -0.15216 |

|   |          |          |          |
|---|----------|----------|----------|
| H | 6.301131 | -7.40765 | -0.41568 |
| H | -6.80581 | -4.34137 | 4.515803 |
| H | -3.73523 | -1.53    | 6.183133 |
| H | 10.86482 | -2.12988 | -5.0916  |
| H | 8.118773 | 3.701032 | -4.80933 |
| H | 1.558671 | 6.880435 | -4.49871 |
| H | 4.430824 | 6.82127  | -2.4914  |
| H | -0.92191 | 5.762614 | 6.593217 |
| H | -6.06598 | 2.101117 | -4.48069 |
| H | -9.06576 | -1.81203 | -5.82194 |
| H | -11.2247 | 2.262179 | -0.84874 |
| H | 8.411213 | -2.50259 | 1.034316 |
| H | 7.072312 | -2.3536  | 0.270403 |
| C | 3.810743 | -3.34775 | -4.12477 |
| O | 4.893968 | -2.67902 | -3.83345 |
| O | 2.692662 | -3.16894 | -3.62455 |
| C | 4.030261 | -4.42786 | -5.17338 |
| H | 3.104942 | -4.97895 | -5.35035 |
| H | 4.815707 | -5.11651 | -4.84363 |
| H | 4.370804 | -3.96925 | -6.10849 |
| H | 0.319708 | 2.684691 | -3.3222  |
| H | -1.02674 | 1.733427 | -2.75452 |
| H | 0.584426 | 1.343797 | -2.32659 |
| O | 1.63219  | 0.718763 | -1.03797 |
| H | 2.351298 | 0.146305 | -1.40547 |
| H | 1.048025 | 0.100556 | -0.53083 |
| O | -2.52753 | -1.12201 | -1.1068  |
| H | -2.70986 | -0.21326 | -1.43263 |
| H | -1.71125 | -1.0439  | -0.55109 |
| O | -0.20179 | -0.87556 | 0.340092 |
| H | 0.035098 | -1.74945 | 0.711594 |
| H | -0.14899 | -0.2695  | 1.144795 |

<sup>5</sup>TS<sub>2B,C4</sub>

|   |          |          |          |
|---|----------|----------|----------|
| C | -4.07911 | -1.25391 | 6.227831 |
| H | -3.5287  | -0.90156 | 5.345525 |
| C | -3.10312 | -1.95104 | 7.18128  |
| H | -3.57314 | -2.08518 | 8.162429 |
| H | -2.89424 | -2.95219 | 6.797746 |
| C | -1.78343 | -1.1905  | 7.356115 |
| H | -1.9599  | -0.16934 | 7.720775 |
| H | -1.17447 | -1.68599 | 8.124895 |
| C | -0.94524 | -1.12755 | 6.074901 |
| O | -1.17871 | -1.86903 | 5.107595 |
| N | 0.064233 | -0.23878 | 6.061082 |
| H | 0.232792 | 0.377648 | 6.842417 |
| H | 0.636148 | -0.14205 | 5.212417 |
| C | -5.18054 | -2.17159 | 5.697054 |
| O | -5.13731 | -3.40349 | 5.809764 |
| N | -6.18961 | -1.53878 | 5.045106 |
| H | -6.1087  | -0.5371  | 4.896041 |
| C | -7.14569 | -2.26723 | 4.209082 |
| H | -7.98797 | -1.59498 | 4.016512 |
| C | -6.52    | -2.75424 | 2.886407 |
| H | -5.72534 | -3.46702 | 3.132139 |
| H | -7.27841 | -3.31251 | 2.32129  |
| C | -5.94139 | -1.59824 | 2.055557 |
| H | -5.50872 | -0.86018 | 2.737404 |
| H | -6.73544 | -1.06936 | 1.514219 |
| C | -4.81059 | -1.96016 | 1.09471  |
| H | -4.37952 | -1.03168 | 0.71663  |
| H | -4.02129 | -2.50447 | 1.634434 |
| N | -5.26397 | -2.76225 | -0.04474 |
| H | -6.01546 | -3.44182 | 0.085575 |
| C | -4.5803  | -2.87547 | -1.19382 |
| N | -3.54529 | -2.08085 | -1.48684 |
| H | -3.37889 | -1.1691  | -1.02042 |
| H | -3.13204 | -2.23435 | -2.40442 |
| N | -4.92678 | -3.83606 | -2.07244 |
| H | -5.72197 | -4.4273  | -1.85779 |
| H | -4.55329 | -3.76288 | -3.01941 |
| C | -2.87426 | -6.51105 | 0.732286 |
| H | -1.99884 | -7.17207 | 0.709374 |
| H | -2.75845 | -5.78512 | -0.0822  |
| C | -3.01008 | -5.82957 | 2.058479 |
| N | -2.01644 | -5.00707 | 2.567175 |
| C | -2.46565 | -4.58296 | 3.744127 |
| H | -1.95998 | -3.89391 | 4.409841 |
| N | -3.68895 | -5.09015 | 4.020081 |



|   |          |          |          |
|---|----------|----------|----------|
| H | -4.2776  | -4.76766 | 4.790781 |
| C | -4.05419 | -5.88272 | 2.950925 |
| H | -4.99516 | -6.41118 | 2.922695 |
| C | 7.488069 | 2.511558 | -5.53452 |
| C | 7.405939 | 3.001393 | -4.08648 |
| C | 6.151931 | 2.216301 | -6.26003 |
| O | 8.105449 | 2.476651 | -3.21113 |
| C | 5.246601 | 1.291605 | -5.49995 |
| C | 5.22754  | -0.07099 | -5.30401 |
| N | 4.229119 | 1.797529 | -4.71755 |
| C | 3.64674  | 0.773805 | -4.08585 |
| N | 4.213826 | -0.38894 | -4.41896 |
| H | 8.043809 | 3.259005 | -6.11685 |
| H | 5.61062  | 3.148403 | -6.45804 |
| H | 6.393278 | 1.786207 | -7.23901 |
| H | 5.875951 | -0.8314  | -5.71294 |
| H | 2.854767 | 0.879661 | -3.36615 |
| H | 3.969165 | 2.841248 | -4.66111 |
| N | 6.60605  | 4.068703 | -3.82639 |
| H | 5.819643 | 4.319711 | -4.42818 |
| C | 6.54795  | 4.642405 | -2.48685 |
| H | 7.559489 | 4.638525 | -2.07024 |
| C | 5.588934 | 3.910046 | -1.5334  |
| O | 4.539637 | 4.441855 | -1.15341 |
| N | 5.991945 | 2.676442 | -1.15834 |
| C | 5.181687 | 1.752811 | -0.36143 |
| C | 4.629856 | 2.466907 | 0.897232 |
| C | 6.075436 | 0.576528 | 0.069032 |
| O | 5.379168 | 2.903285 | 1.76528  |
| C | 5.315351 | -0.61034 | 0.673155 |
| C | 4.6272   | -1.55584 | -0.31507 |
| O | 4.090618 | -2.60155 | 0.135872 |
| O | 4.675237 | -1.25125 | -1.55366 |
| H | 6.853031 | 2.332703 | -1.58179 |
| H | 4.349976 | 1.382178 | -0.9725  |
| H | 6.643571 | 0.227552 | -0.80046 |
| H | 6.786898 | 0.965208 | 0.805348 |
| H | 4.554409 | -0.27156 | 1.389401 |
| H | 6.002515 | -1.23376 | 1.259298 |
| N | 3.27425  | 2.552572 | 0.958587 |
| H | 2.721014 | 2.096401 | 0.236566 |
| C | 2.563571 | 3.155736 | 2.081848 |
| H | 1.529833 | 3.287828 | 1.740823 |
| C | 2.475475 | 2.225386 | 3.300122 |
| H | 3.432834 | 1.735978 | 3.492626 |
| H | 2.238153 | 2.836867 | 4.178377 |
| C | 1.360367 | 1.192788 | 3.112741 |

|   |          |          |          |
|---|----------|----------|----------|
| O | 0.322985 | 1.580965 | 2.509886 |
| O | 1.535804 | 0.021447 | 3.589235 |
| C | 3.028398 | 4.572277 | 2.461277 |
| O | 2.822087 | 5.005719 | 3.600282 |
| N | 3.50813  | 5.365411 | 1.467836 |
| H | 3.792933 | 4.940765 | 0.584621 |
| C | 4.072612 | 6.671067 | 1.812663 |
| H | 4.680129 | 6.558519 | 2.717398 |
| C | 4.953985 | 7.206391 | 0.679743 |
| H | 5.799082 | 6.534896 | 0.503254 |
| H | 5.331879 | 8.191901 | 0.963064 |
| H | 4.388737 | 7.299247 | -0.25389 |
| C | 3.019685 | 7.72627  | 2.201835 |
| O | 3.366726 | 8.757577 | 2.766514 |
| N | 1.72601  | 7.444007 | 1.870465 |
| H | 1.540214 | 6.580428 | 1.37726  |
| C | 0.615511 | 8.284001 | 2.275974 |
| H | 1.077096 | 9.179604 | 2.706959 |
| C | -0.26077 | 8.728562 | 1.080046 |
| H | 0.361798 | 9.35682  | 0.43334  |
| H | -1.05865 | 9.353204 | 1.490511 |
| C | -0.85404 | 7.5929   | 0.270162 |
| C | -0.19772 | 7.101253 | -0.86778 |
| H | 0.741998 | 7.552907 | -1.17833 |
| C | -0.74067 | 6.05547  | -1.62    |
| H | -0.20962 | 5.702423 | -2.50128 |
| C | -1.95604 | 5.479836 | -1.24256 |
| H | -2.39312 | 4.671175 | -1.82324 |
| C | -2.61729 | 5.957943 | -0.10729 |
| H | -3.56608 | 5.51921  | 0.192086 |
| C | -2.07396 | 7.002868 | 0.641127 |
| H | -2.58994 | 7.372511 | 1.522423 |
| C | -0.24892 | 7.675591 | 3.407035 |
| O | -1.34243 | 8.179914 | 3.67638  |
| N | 0.286887 | 6.627295 | 4.076582 |
| H | 1.209845 | 6.282039 | 3.822958 |
| C | -0.34572 | 6.041458 | 5.252286 |
| H | -1.09525 | 6.754614 | 5.602129 |
| C | -0.97084 | 4.657537 | 5.003256 |
| H | -0.1878  | 3.983481 | 4.630564 |
| H | -1.29039 | 4.2574   | 5.978795 |
| C | -2.16407 | 4.617746 | 4.029177 |
| H | -1.82208 | 5.024116 | 3.067487 |
| C | -2.59158 | 3.160287 | 3.783715 |
| H | -3.38587 | 3.128171 | 3.024266 |
| H | -1.75614 | 2.547824 | 3.427741 |
| H | -2.97773 | 2.709741 | 4.711779 |

|   |          |          |          |
|---|----------|----------|----------|
| C | -3.34987 | 5.468434 | 4.508409 |
| H | -4.20502 | 5.359395 | 3.829269 |
| H | -3.68201 | 5.15434  | 5.508304 |
| H | -3.08966 | 6.530259 | 4.544169 |
| C | -5.64264 | 1.449398 | -4.70812 |
| H | -5.03631 | 1.134381 | -5.56093 |
| C | -4.80299 | 1.274512 | -3.43122 |
| H | -5.27473 | 1.76411  | -2.57504 |
| H | -4.72687 | 0.206633 | -3.18001 |
| C | -3.35745 | 1.782527 | -3.57368 |
| O | -2.81236 | 1.697937 | -4.7149  |
| O | -2.78994 | 2.197858 | -2.52037 |
| C | -6.93972 | 0.658722 | -4.67228 |
| O | -8.02659 | 1.166214 | -4.37192 |
| N | -6.82278 | -0.67168 | -4.9682  |
| H | -5.90428 | -1.04446 | -5.23233 |
| C | -7.99011 | -1.47514 | -5.28185 |
| H | -8.6811  | -0.90579 | -5.91622 |
| C | -8.84092 | -1.97555 | -4.11448 |
| O | -9.78398 | -2.74287 | -4.32747 |
| N | -8.52496 | -1.51639 | -2.87762 |
| H | -7.70864 | -0.92607 | -2.78749 |
| C | -9.41215 | -1.68996 | -1.73687 |
| H | -10.3394 | -2.10362 | -2.1476  |
| C | -8.83554 | -2.64782 | -0.68399 |
| H | -9.58453 | -2.77953 | 0.104498 |
| H | -7.96425 | -2.18916 | -0.21024 |
| C | -8.39696 | -4.01634 | -1.18318 |
| O | -7.4323  | -4.5981  | -0.65314 |
| N | -9.11757 | -4.59897 | -2.16568 |
| H | -9.67995 | -4.05353 | -2.82018 |
| H | -8.77964 | -5.49533 | -2.49376 |
| C | -9.81254 | -0.36054 | -1.05156 |
| O | -10.3395 | -0.4035  | 0.057474 |
| N | -9.57551 | 0.776901 | -1.74879 |
| H | -9.17825 | 0.739269 | -2.6853  |
| C | -9.97452 | 2.085577 | -1.24201 |
| H | -10.643  | 1.905963 | -0.39755 |
| C | -8.79169 | 2.984636 | -0.83369 |
| H | -8.12072 | 3.088001 | -1.6955  |
| H | -9.2047  | 3.987125 | -0.64779 |
| C | -7.99623 | 2.533432 | 0.378328 |
| C | -6.6051  | 2.398121 | 0.311789 |
| H | -6.09287 | 2.583298 | -0.6292  |
| C | -5.84218 | 2.039809 | 1.426052 |
| H | -4.76872 | 1.900537 | 1.320317 |
| C | -6.47984 | 1.82488  | 2.649397 |

|   |          |          |          |
|---|----------|----------|----------|
| O | -5.78718 | 1.457019 | 3.788907 |
| H | -4.85027 | 1.691431 | 3.674665 |
| C | -7.86892 | 1.944588 | 2.743686 |
| H | -8.35242 | 1.777971 | 3.701778 |
| C | -8.61163 | 2.2914   | 1.61705  |
| H | -9.69051 | 2.378698 | 1.711804 |
| C | 2.818527 | 6.285916 | -3.67689 |
| H | 3.174168 | 6.354548 | -2.64161 |
| H | 1.802391 | 6.687643 | -3.72038 |
| C | 2.845615 | 4.815522 | -4.0746  |
| O | 3.896983 | 4.399404 | -4.67308 |
| O | 1.871467 | 4.079415 | -3.78011 |
| C | 8.042188 | -5.02102 | -5.77623 |
| C | 7.220552 | -4.26665 | -4.78363 |
| C | 6.031538 | -3.59264 | -4.88947 |
| N | 7.584349 | -4.1147  | -3.45409 |
| C | 6.637895 | -3.37592 | -2.82355 |
| N | 5.681501 | -3.03927 | -3.6708  |
| H | 8.182642 | -6.06875 | -5.48112 |
| H | 7.545082 | -5.01598 | -6.75013 |
| H | 5.398978 | -3.48659 | -5.75901 |
| H | 6.664145 | -3.178   | -1.76244 |
| H | 8.400146 | -4.50923 | -3.00762 |
| C | 4.293082 | -7.72885 | 1.317123 |
| H | 4.909928 | -8.28089 | 0.593267 |
| C | 3.573154 | -6.58705 | 0.580597 |
| H | 4.298192 | -5.88144 | 0.158342 |
| H | 3.054133 | -7.03222 | -0.28049 |
| C | 2.54839  | -5.83071 | 1.437243 |
| H | 1.867475 | -6.54485 | 1.920494 |
| H | 3.056894 | -5.28631 | 2.24327  |
| C | 1.734399 | -4.84751 | 0.58218  |
| H | 2.388778 | -4.11162 | 0.109645 |
| H | 1.230969 | -5.37559 | -0.23393 |
| N | 0.691211 | -4.14328 | 1.32695  |
| H | -0.18552 | -4.63022 | 1.537655 |
| C | 0.818989 | -2.95987 | 1.932494 |
| N | 1.954769 | -2.27842 | 2.018761 |
| H | 2.794786 | -2.53207 | 1.48996  |
| H | 1.916148 | -1.36515 | 2.494906 |
| N | -0.32233 | -2.39726 | 2.441018 |
| H | -1.10726 | -3.04292 | 2.48063  |
| H | -0.23758 | -1.84175 | 3.297631 |
| C | 5.210162 | -7.38082 | 2.491127 |
| O | 5.179169 | -8.0319  | 3.532603 |
| N | 6.112242 | -6.36858 | 2.286368 |
| H | 6.145494 | -5.85401 | 1.404693 |

|    |          |          |          |
|----|----------|----------|----------|
| C  | 7.180177 | -6.16339 | 3.24111  |
| H  | 6.90814  | -6.72735 | 4.136952 |
| C  | 7.470089 | -4.69582 | 3.558456 |
| O  | 7.446507 | -3.80027 | 2.705505 |
| N  | 7.857585 | -4.4575  | 4.833652 |
| H  | 7.800943 | -5.21434 | 5.499659 |
| C  | 8.347767 | -3.15264 | 5.28806  |
| H  | 9.058748 | -2.78537 | 4.541056 |
| C  | 7.242344 | -2.10558 | 5.489674 |
| H  | 7.714095 | -1.15039 | 5.749267 |
| H  | 6.743769 | -1.95807 | 4.527527 |
| C  | 6.221753 | -2.47861 | 6.568878 |
| H  | 5.826346 | -3.48849 | 6.40681  |
| H  | 6.685469 | -2.46612 | 7.562432 |
| S  | 4.80796  | -1.31155 | 6.673545 |
| C  | 3.897434 | -1.78469 | 5.16126  |
| H  | 3.131316 | -1.02858 | 4.974858 |
| H  | 4.561899 | -1.80221 | 4.292454 |
| H  | 3.422841 | -2.76435 | 5.276662 |
| O  | 1.986793 | -1.37325 | -2.754   |
| O  | 6.391496 | -4.29274 | 0.197789 |
| Fe | 3.749457 | -2.0294  | -3.17277 |
| C  | -0.54584 | -1.99657 | -4.81082 |
| H  | 0.112565 | -2.70337 | -5.32314 |
| H  | -0.9356  | -2.52497 | -3.9332  |
| C  | -1.78653 | -1.7422  | -5.73638 |
| H  | -1.66684 | -2.34951 | -6.64009 |
| C  | -3.19774 | -2.12291 | -5.15471 |
| O  | -3.21858 | -2.94735 | -4.21568 |
| O  | -4.15035 | -1.55686 | -5.75497 |
| N  | -1.97131 | -0.33126 | -6.25317 |
| H  | -2.20173 | 0.405345 | -5.51324 |
| H  | -2.85429 | -0.3856  | -6.78518 |
| H  | -1.20079 | 0.000182 | -6.83769 |
| C  | 0.245043 | -0.79361 | -4.40442 |
| H  | 1.120804 | -0.52806 | -4.98739 |
| H  | 1.460892 | -2.20073 | -2.57964 |
| C  | -0.33254 | 0.218311 | -3.47849 |
| H  | -0.02632 | -0.03009 | -2.45613 |
| H  | -1.42445 | 0.16843  | -3.46835 |
| C  | 0.120487 | 1.641839 | -3.81176 |
| H  | 1.152908 | 1.687205 | -4.14897 |
| H  | -0.52114 | 2.083717 | -4.5743  |
| N  | 0.02969  | 2.524932 | -2.6133  |
| H  | 8.127557 | -6.58698 | 2.867056 |
| H  | 8.89889  | -3.326   | 6.218856 |
| H  | -3.75811 | -7.11909 | 0.515673 |

|   |          |          |          |
|---|----------|----------|----------|
| H | 3.564869 | -8.4407  | 1.717374 |
| H | -7.5176  | -3.11961 | 4.783618 |
| H | -4.52744 | -0.36594 | 6.692627 |
| H | 9.037112 | -4.57669 | -5.90831 |
| H | 8.098142 | 1.605481 | -5.49831 |
| H | 3.48277  | 6.87934  | -4.3106  |
| H | 6.192016 | 5.670077 | -2.56825 |
| H | 0.419359 | 5.94874  | 6.032767 |
| H | -5.90736 | 2.501521 | -4.84373 |
| H | -7.66844 | -2.35125 | -5.85055 |
| H | -10.5493 | 2.595054 | -2.02457 |
| H | 6.863242 | -3.99587 | 1.0092   |
| H | 5.528923 | -3.82767 | 0.243291 |
| C | 1.928694 | -4.39612 | -3.34078 |
| O | 3.02597  | -3.80451 | -3.70187 |
| O | 1.029793 | -3.88408 | -2.64919 |
| C | 1.799104 | -5.83379 | -3.82075 |
| H | 0.802398 | -6.22418 | -3.60614 |
| H | 2.550044 | -6.45163 | -3.31452 |
| H | 2.005595 | -5.89432 | -4.89421 |
| H | 0.539058 | 3.407671 | -2.8397  |
| H | -0.98228 | 2.659323 | -2.40352 |
| H | 0.520493 | 2.052888 | -1.82453 |
| O | 1.516424 | 0.768953 | -0.86047 |
| H | 1.789601 | 0.005982 | -1.42313 |
| H | 0.819889 | 0.402936 | -0.25288 |
| O | -3.10121 | 0.442165 | -0.35053 |
| H | -3.05574 | 1.145838 | -1.0383  |
| H | -2.19609 | 0.375339 | 0.045884 |
| O | -0.6064  | -0.01119 | 0.697322 |
| H | -0.62348 | -0.89938 | 1.113608 |
| H | -0.36698 | 0.597161 | 1.470851 |

<sup>5</sup>Pr<sub>B,C4</sub>

|   |          |          |          |
|---|----------|----------|----------|
| C | -2.20521 | -3.888   | 6.458298 |
| H | -2.01586 | -2.8989  | 6.025617 |
| C | -0.96322 | -4.77536 | 6.284009 |
| H | -0.93112 | -5.53065 | 7.077357 |
| H | -1.05281 | -5.32247 | 5.343061 |
| C | 0.350035 | -3.98549 | 6.291903 |
| H | 0.442145 | -3.37806 | 7.2026   |
| H | 1.20195  | -4.67891 | 6.307508 |
| C | 0.511641 | -3.06338 | 5.077635 |
| O | -0.346   | -3.03657 | 4.174853 |
| N | 1.609613 | -2.29501 | 5.059982 |
| H | 2.344366 | -2.40041 | 5.750742 |
| H | 1.772634 | -1.62286 | 4.299961 |
| C | -3.44888 | -4.43375 | 5.756114 |
| O | -3.44954 | -5.48502 | 5.1076   |
| N | -4.56093 | -3.65913 | 5.874773 |
| H | -4.47427 | -2.77834 | 6.362988 |
| C | -5.77389 | -3.91226 | 5.097971 |
| H | -6.61105 | -3.43427 | 5.61824  |
| C | -5.66888 | -3.417   | 3.645701 |
| H | -4.7539  | -3.83901 | 3.213302 |
| H | -6.5042  | -3.84003 | 3.074054 |
| C | -5.65854 | -1.88352 | 3.505261 |
| H | -5.09318 | -1.42594 | 4.327163 |
| H | -6.68241 | -1.49395 | 3.586443 |
| C | -5.00906 | -1.37658 | 2.211893 |
| H | -5.10403 | -0.28709 | 2.144816 |
| H | -3.93901 | -1.61676 | 2.220541 |
| N | -5.60207 | -2.02262 | 1.034245 |
| H | -6.50349 | -2.49818 | 1.12565  |
| C | -4.94093 | -2.27385 | -0.1021  |
| N | -3.76149 | -1.68385 | -0.37061 |
| H | -3.57902 | -0.71356 | -0.05933 |
| H | -3.3522  | -1.95325 | -1.26356 |
| N | -5.45281 | -3.1447  | -0.98579 |
| H | -6.21233 | -3.74707 | -0.69191 |
| H | -4.96173 | -3.27234 | -1.87539 |
| C | -2.87208 | -6.19499 | -1.30817 |
| H | -1.98613 | -6.71557 | -1.6941  |
| H | -2.94856 | -5.23813 | -1.83808 |
| C | -2.78107 | -5.99786 | 0.173447 |
| N | -1.79056 | -5.21705 | 0.748107 |
| C | -1.99645 | -5.27453 | 2.058932 |
| H | -1.41913 | -4.76695 | 2.821505 |
| N | -3.06429 | -6.04755 | 2.357892 |

|   |          |          |          |
|---|----------|----------|----------|
| H | -3.42777 | -6.1511  | 3.304906 |
| C | -3.5793  | -6.51524 | 1.166676 |
| H | -4.44003 | -7.1657  | 1.128958 |
| C | 6.611946 | 4.027295 | -5.48823 |
| C | 6.664514 | 4.213617 | -3.96726 |
| C | 5.243943 | 3.61624  | -6.09781 |
| O | 7.462527 | 3.556509 | -3.27993 |
| C | 4.615737 | 2.469745 | -5.3649  |
| C | 4.817444 | 1.107128 | -5.36263 |
| N | 3.753364 | 2.721397 | -4.32037 |
| C | 3.481475 | 1.555827 | -3.72014 |
| N | 4.102454 | 0.541467 | -4.32238 |
| H | 6.943738 | 4.959004 | -5.96459 |
| H | 4.55065  | 4.464318 | -6.08171 |
| H | 5.407975 | 3.360328 | -7.15033 |
| H | 5.438021 | 0.50484  | -6.01071 |
| H | 2.871129 | 1.468213 | -2.83745 |
| H | 3.352556 | 3.697692 | -4.10903 |
| N | 5.86826  | 5.170729 | -3.42733 |
| H | 5.000671 | 5.457897 | -3.88822 |
| C | 5.958194 | 5.516693 | -2.01197 |
| H | 7.010984 | 5.466873 | -1.71966 |
| C | 5.114901 | 4.628249 | -1.08083 |
| O | 4.086853 | 5.055934 | -0.54939 |
| N | 5.600892 | 3.377574 | -0.89286 |
| C | 4.869071 | 2.329848 | -0.17856 |
| C | 4.378881 | 2.832637 | 1.199063 |
| C | 5.803344 | 1.129532 | 0.047684 |
| O | 5.168731 | 3.164421 | 2.077407 |
| C | 5.11377  | -0.13727 | 0.593737 |
| C | 4.473872 | -1.04841 | -0.4487  |
| O | 4.504872 | -2.29032 | -0.28708 |
| O | 3.892556 | -0.49028 | -1.46185 |
| H | 6.412872 | 3.117766 | -1.44875 |
| H | 4.010992 | 2.022538 | -0.78209 |
| H | 6.314861 | 0.887923 | -0.89047 |
| H | 6.563128 | 1.45281  | 0.767187 |
| H | 4.334477 | 0.119077 | 1.326471 |
| H | 5.838379 | -0.74927 | 1.138657 |
| N | 3.028724 | 2.822692 | 1.353894 |
| H | 2.454003 | 2.478086 | 0.587156 |
| C | 2.372175 | 3.130429 | 2.620135 |
| H | 1.299723 | 3.185221 | 2.398454 |
| C | 2.539511 | 1.999045 | 3.651494 |
| H | 3.595082 | 1.748256 | 3.772825 |
| H | 2.152008 | 2.357438 | 4.610017 |
| C | 1.719224 | 0.789042 | 3.196624 |



|   |          |          |          |
|---|----------|----------|----------|
| O | 0.498044 | 0.994389 | 2.972645 |
| O | 2.317144 | -0.33293 | 3.051018 |
| C | 2.728643 | 4.512039 | 3.196249 |
| O | 2.546957 | 4.749401 | 4.394005 |
| N | 3.103284 | 5.474749 | 2.313089 |
| H | 3.353954 | 5.20995  | 1.361583 |
| C | 3.562821 | 6.771669 | 2.810294 |
| H | 4.163523 | 6.597377 | 3.709779 |
| C | 4.420472 | 7.486993 | 1.762416 |
| H | 5.321556 | 6.905103 | 1.546451 |
| H | 4.708754 | 8.466477 | 2.151691 |
| H | 3.869685 | 7.625169 | 0.825724 |
| C | 2.427625 | 7.696569 | 3.29576  |
| O | 2.694139 | 8.713206 | 3.927574 |
| N | 1.161697 | 7.303604 | 2.982246 |
| H | 1.050716 | 6.474045 | 2.413564 |
| C | -0.027   | 7.975295 | 3.470846 |
| H | 0.319802 | 8.923506 | 3.895689 |
| C | -1.02493 | 8.285523 | 2.327383 |
| H | -0.56502 | 9.04009  | 1.679421 |
| H | -1.90829 | 8.730501 | 2.793392 |
| C | -1.41175 | 7.071788 | 1.505702 |
| C | -0.73342 | 6.763733 | 0.316439 |
| H | 0.049808 | 7.431288 | -0.03725 |
| C | -1.05174 | 5.622729 | -0.4262  |
| H | -0.51048 | 5.409022 | -1.3456  |
| C | -2.06139 | 4.767508 | 0.020974 |
| H | -2.31447 | 3.876755 | -0.54855 |
| C | -2.75113 | 5.062187 | 1.200731 |
| H | -3.53767 | 4.399758 | 1.553125 |
| C | -2.43136 | 6.206309 | 1.934065 |
| H | -2.96684 | 6.434262 | 2.851276 |
| C | -0.73188 | 7.229663 | 4.63333  |
| O | -1.84923 | 7.60063  | 5.001092 |
| N | -0.03887 | 6.219136 | 5.208757 |
| H | 0.88051  | 5.970078 | 4.854305 |
| C | -0.52376 | 5.490956 | 6.375146 |
| H | -1.35258 | 6.068879 | 6.78887  |
| C | -0.94462 | 4.043018 | 6.070831 |
| H | -0.0816  | 3.52079  | 5.635158 |
| H | -1.15287 | 3.547945 | 7.032632 |
| C | -2.16095 | 3.868603 | 5.140952 |
| H | -1.93319 | 4.379357 | 4.195205 |
| C | -2.37648 | 2.38122  | 4.818204 |
| H | -3.21731 | 2.252822 | 4.124493 |
| H | -1.48493 | 1.937113 | 4.360031 |
| H | -2.60854 | 1.812713 | 5.731093 |

|   |          |          |          |
|---|----------|----------|----------|
| C | -3.4374  | 4.498494 | 5.720038 |
| H | -4.29497 | 4.302464 | 5.064521 |
| H | -3.67232 | 4.073413 | 6.706664 |
| H | -3.33933 | 5.583453 | 5.823493 |
| C | -5.75156 | 1.104977 | -4.48203 |
| H | -5.20735 | 0.733583 | -5.35584 |
| C | -4.87092 | 0.898288 | -3.23546 |
| H | -5.30381 | 1.397764 | -2.3665  |
| H | -4.81262 | -0.17204 | -2.99707 |
| C | -3.42521 | 1.376399 | -3.43849 |
| O | -2.88324 | 1.169475 | -4.56676 |
| O | -2.8339  | 1.9108   | -2.4522  |
| C | -7.10342 | 0.410698 | -4.39575 |
| O | -8.16876 | 1.027824 | -4.28406 |
| N | -7.06456 | -0.95558 | -4.43989 |
| H | -6.1612  | -1.42715 | -4.54704 |
| C | -8.26268 | -1.74161 | -4.66973 |
| H | -8.904   | -1.23583 | -5.40309 |
| C | -9.1628  | -2.02227 | -3.46474 |
| O | -10.0465 | -2.88162 | -3.53759 |
| N | -8.96131 | -1.25826 | -2.36238 |
| H | -8.19287 | -0.6011  | -2.37491 |
| C | -9.90505 | -1.21741 | -1.25623 |
| H | -10.7784 | -1.78852 | -1.58824 |
| C | -9.32699 | -1.84292 | 0.022029 |
| H | -10.0931 | -1.78975 | 0.803658 |
| H | -8.48149 | -1.2457  | 0.378094 |
| C | -8.84802 | -3.28134 | -0.09889 |
| O | -7.90488 | -3.69592 | 0.60226  |
| N | -9.50647 | -4.10702 | -0.94029 |
| H | -10.0279 | -3.75744 | -1.74597 |
| H | -9.14139 | -5.04876 | -1.01239 |
| C | -10.4303 | 0.203132 | -0.93969 |
| O | -11.0144 | 0.387337 | 0.126464 |
| N | -10.235  | 1.15164  | -1.88598 |
| H | -9.7141  | 0.937326 | -2.73269 |
| C | -10.6197 | 2.541388 | -1.66142 |
| H | -11.1425 | 2.563211 | -0.7038  |
| C | -9.42232 | 3.508223 | -1.67897 |
| H | -9.02686 | 3.556432 | -2.70125 |
| H | -9.81741 | 4.511055 | -1.45686 |
| C | -8.28168 | 3.158497 | -0.73981 |
| C | -6.9599  | 3.331976 | -1.16742 |
| H | -6.77175 | 3.729806 | -2.16257 |
| C | -5.87216 | 3.008932 | -0.35589 |
| H | -4.86024 | 3.164697 | -0.71773 |
| C | -6.08933 | 2.474115 | 0.920775 |

|   |          |          |          |
|---|----------|----------|----------|
| O | -5.06482 | 2.090109 | 1.738599 |
| H | -4.26956 | 1.869746 | 1.191212 |
| C | -7.40472 | 2.325107 | 1.378852 |
| H | -7.56964 | 1.927471 | 2.376208 |
| C | -8.48081 | 2.666882 | 0.560057 |
| H | -9.48795 | 2.506368 | 0.934182 |
| C | 1.883189 | 7.00968  | -2.9844  |
| H | 2.376591 | 7.062443 | -2.00569 |
| H | 0.845653 | 7.332689 | -2.87459 |
| C | 1.963818 | 5.566682 | -3.46609 |
| O | 3.073994 | 5.210483 | -3.99523 |
| O | 0.971454 | 4.819043 | -3.29059 |
| C | 9.712178 | 0.633157 | -2.9758  |
| C | 8.512899 | -0.25531 | -2.9346  |
| C | 7.20209  | -0.01643 | -3.25234 |
| N | 8.532817 | -1.58065 | -2.52258 |
| C | 7.273984 | -2.08337 | -2.59723 |
| N | 6.439986 | -1.15481 | -3.04059 |
| H | 10.44683 | 0.301522 | -3.7212  |
| H | 9.393442 | 1.647263 | -3.2334  |
| H | 6.770145 | 0.906359 | -3.60605 |
| H | 7.015429 | -3.08326 | -2.27208 |
| H | 9.34319  | -2.0916  | -2.20158 |
| C | 3.961739 | -7.51335 | -1.38852 |
| H | 4.736594 | -7.74085 | -2.13463 |
| C | 3.462716 | -6.07713 | -1.61481 |
| H | 4.297159 | -5.36996 | -1.54839 |
| H | 3.090128 | -6.01156 | -2.64612 |
| C | 2.345739 | -5.64562 | -0.65498 |
| H | 1.54059  | -6.39355 | -0.65382 |
| H | 2.728398 | -5.5957  | 0.372725 |
| C | 1.772633 | -4.28053 | -1.05717 |
| H | 2.560026 | -3.52332 | -1.07288 |
| H | 1.372995 | -4.32317 | -2.07534 |
| N | 0.693    | -3.8305  | -0.17635 |
| H | -0.16939 | -4.39161 | -0.12785 |
| C | 0.794292 | -2.91553 | 0.789272 |
| N | 1.926559 | -2.32591 | 1.149341 |
| H | 2.815044 | -2.56807 | 0.715429 |
| H | 1.93108  | -1.54861 | 1.842206 |
| N | -0.36639 | -2.51466 | 1.411712 |
| H | -1.17052 | -3.08269 | 1.15018  |
| H | -0.28832 | -2.41713 | 2.437224 |
| C | 4.544412 | -7.86017 | -0.01862 |
| O | 4.255351 | -8.90994 | 0.552166 |
| N | 5.439962 | -6.9761  | 0.521625 |
| H | 5.750196 | -6.14932 | 0.006924 |

|    |          |          |          |
|----|----------|----------|----------|
| C  | 6.153117 | -7.38276 | 1.713552 |
| H  | 5.446081 | -7.889   | 2.378133 |
| C  | 6.86303  | -6.23601 | 2.426761 |
| O  | 7.354533 | -5.26286 | 1.8464   |
| N  | 6.991267 | -6.40869 | 3.766378 |
| H  | 6.55817  | -7.21904 | 4.185194 |
| C  | 7.817013 | -5.54286 | 4.6131   |
| H  | 8.796711 | -5.42869 | 4.136252 |
| C  | 7.222126 | -4.1483  | 4.866892 |
| H  | 7.921716 | -3.58906 | 5.500187 |
| H  | 7.168929 | -3.6274  | 3.907125 |
| C  | 5.841962 | -4.17581 | 5.526985 |
| H  | 5.139557 | -4.76361 | 4.925053 |
| H  | 5.892449 | -4.6366  | 6.521055 |
| S  | 5.1201   | -2.50975 | 5.812539 |
| C  | 5.056916 | -1.88011 | 4.094096 |
| H  | 4.3395   | -1.05718 | 4.053319 |
| H  | 6.036983 | -1.52424 | 3.767021 |
| H  | 4.703123 | -2.66279 | 3.415299 |
| O  | 1.45485  | -1.74432 | -3.54826 |
| O  | 6.408929 | -4.39321 | -0.6239  |
| Fe | 4.259848 | -1.29636 | -3.29054 |
| C  | -0.79824 | -2.49066 | -4.0608  |
| H  | -0.26949 | -3.39536 | -4.37603 |
| H  | -1.09669 | -2.64798 | -3.01988 |
| C  | -2.08846 | -2.39396 | -4.91146 |
| H  | -2.08139 | -3.20156 | -5.6515  |
| C  | -3.46597 | -2.52727 | -4.16771 |
| O  | -3.46106 | -2.98725 | -3.00116 |
| O  | -4.44296 | -2.16019 | -4.87193 |
| N  | -2.26924 | -1.13909 | -5.74381 |
| H  | -2.42373 | -0.23898 | -5.17837 |
| H  | -3.18691 | -1.28419 | -6.19328 |
| H  | -1.53352 | -0.99633 | -6.43845 |
| C  | 0.219849 | -1.3256  | -4.11453 |
| H  | 0.384884 | -1.03532 | -5.1707  |
| H  | 1.757241 | -2.57771 | -4.0093  |
| C  | -0.25913 | -0.11202 | -3.30562 |
| H  | 0.185441 | -0.2164  | -2.31197 |
| H  | -1.34174 | -0.1313  | -3.16998 |
| C  | 0.1305   | 1.238711 | -3.906   |
| H  | 1.170954 | 1.245993 | -4.22734 |
| H  | -0.51343 | 1.493116 | -4.7491  |
| N  | -0.05386 | 2.319001 | -2.88894 |
| H  | 6.927393 | -8.13276 | 1.475925 |
| H  | 7.966378 | -6.07741 | 5.557214 |
| H  | -3.74792 | -6.79936 | -1.56581 |

|   |          |          |          |
|---|----------|----------|----------|
| H | 3.151316 | -8.23125 | -1.54819 |
| H | -5.94633 | -4.99143 | 5.110413 |
| H | -2.43356 | -3.72773 | 7.520665 |
| H | 10.22081 | 0.677028 | -2.00432 |
| H | 7.355771 | 3.258006 | -5.71061 |
| H | 2.418066 | 7.678369 | -3.66546 |
| H | 5.59652  | 6.53831  | -1.8862  |
| H | 0.279878 | 5.477585 | 7.12223  |
| H | -5.94917 | 2.169407 | -4.63248 |
| H | -7.97601 | -2.70771 | -5.09144 |
| H | -11.337  | 2.847512 | -2.43347 |
| H | 6.917921 | -4.53254 | 0.202573 |
| H | 5.748237 | -3.70403 | -0.40166 |
| C | 3.590485 | -3.85459 | -4.86264 |
| O | 4.323017 | -2.92295 | -4.34843 |
| O | 2.351256 | -3.9321  | -4.75736 |
| C | 4.355406 | -4.91247 | -5.63961 |
| H | 3.672392 | -5.64039 | -6.08114 |
| H | 5.056158 | -5.42242 | -4.96926 |
| H | 4.951394 | -4.43497 | -6.42462 |
| H | 0.334526 | 3.252577 | -3.19261 |
| H | -1.07881 | 2.381053 | -2.68098 |
| H | 0.458283 | 2.051559 | -2.0257  |
| O | 1.530758 | 1.210224 | -0.72655 |
| H | 2.190679 | 0.514664 | -0.92368 |
| H | 0.809469 | 0.786513 | -0.18249 |
| O | -3.11877 | 1.023789 | 0.139268 |
| H | -3.08043 | 1.391166 | -0.7805  |
| H | -2.17342 | 0.906101 | 0.422739 |
| O | -0.56073 | 0.295387 | 0.725309 |
| H | -0.62601 | -0.68186 | 0.812528 |
| H | -0.22419 | 0.570632 | 1.642077 |

<sup>5</sup>TS1<sub>B,C5</sub>

|   |          |          |          |
|---|----------|----------|----------|
| C | -3.98748 | 0.012334 | 5.986943 |
| H | -3.33692 | 0.128002 | 5.111526 |
| C | -3.17652 | -0.56502 | 7.152138 |
| H | -3.73598 | -0.44691 | 8.087255 |
| H | -3.04881 | -1.64049 | 7.007158 |
| C | -1.79878 | 0.090473 | 7.307822 |
| H | -1.89062 | 1.182618 | 7.388167 |
| H | -1.33525 | -0.2434  | 8.246326 |
| C | -0.82222 | -0.23437 | 6.171363 |
| O | -1.0973  | -1.0677  | 5.294292 |
| N | 0.360853 | 0.406723 | 6.203328 |
| H | 0.522635 | 1.148405 | 6.869567 |
| H | 0.995567 | 0.336312 | 5.396863 |
| C | -5.16715 | -0.86196 | 5.555114 |
| O | -5.38794 | -1.98232 | 6.036097 |
| N | -5.93421 | -0.33001 | 4.572785 |
| H | -5.65736 | 0.554812 | 4.156754 |
| C | -6.95777 | -1.08887 | 3.853094 |
| H | -7.46248 | -0.37429 | 3.196813 |
| C | -6.40505 | -2.27261 | 3.031512 |
| H | -6.17278 | -3.09361 | 3.71819  |
| H | -7.21228 | -2.62646 | 2.375287 |
| C | -5.14582 | -1.93587 | 2.222139 |
| H | -4.40664 | -1.49138 | 2.897804 |
| H | -5.34979 | -1.17988 | 1.455845 |
| C | -4.47585 | -3.15532 | 1.573937 |
| H | -3.41881 | -2.94873 | 1.396104 |
| H | -4.52114 | -4.01564 | 2.251514 |
| N | -5.05581 | -3.57094 | 0.292032 |
| H | -5.86593 | -4.19567 | 0.29321  |
| C | -4.39783 | -3.47594 | -0.87647 |
| N | -3.34791 | -2.66908 | -1.03136 |
| H | -3.2756  | -1.75154 | -0.54727 |
| H | -2.7694  | -2.82981 | -1.86516 |
| N | -4.80108 | -4.23469 | -1.91627 |
| H | -5.47303 | -4.9745  | -1.75805 |
| H | -4.46469 | -4.00854 | -2.85449 |
| C | -2.46263 | -6.94437 | 3.113917 |
| H | -1.50435 | -7.33719 | 3.475861 |
| H | -2.34194 | -6.72157 | 2.045848 |
| C | -2.87686 | -5.72833 | 3.88331  |
| N | -2.10223 | -4.5813  | 3.913135 |
| C | -2.75178 | -3.72655 | 4.69046  |
| H | -2.41762 | -2.72829 | 4.943133 |
| N | -3.90246 | -4.25852 | 5.164061 |

|   |          |          |          |
|---|----------|----------|----------|
| H | -4.58724 | -3.71655 | 5.692136 |
| C | -4.00259 | -5.53633 | 4.653017 |
| H | -4.83264 | -6.1868  | 4.884695 |
| C | 7.521548 | 3.031474 | -5.2796  |
| C | 7.209631 | 3.668462 | -3.92312 |
| C | 6.335441 | 2.390221 | -6.04463 |
| O | 7.878725 | 3.363999 | -2.92771 |
| C | 5.484614 | 1.487038 | -5.20082 |
| C | 5.593372 | 0.178279 | -4.78493 |
| N | 4.357729 | 1.984014 | -4.58152 |
| C | 3.834625 | 1.011986 | -3.83167 |
| N | 4.546408 | -0.11243 | -3.92945 |
| H | 7.987228 | 3.789455 | -5.92388 |
| H | 5.693603 | 3.170932 | -6.47014 |
| H | 6.748089 | 1.836282 | -6.89563 |
| H | 6.342868 | -0.55858 | -5.03038 |
| H | 2.970447 | 1.143148 | -3.20812 |
| H | 3.951705 | 2.97382  | -4.70616 |
| N | 6.22962  | 4.607924 | -3.87057 |
| H | 5.500163 | 4.67278  | -4.57961 |
| C | 5.907534 | 5.286484 | -2.61988 |
| H | 6.845667 | 5.516455 | -2.10541 |
| C | 4.989495 | 4.491773 | -1.67321 |
| O | 3.861954 | 4.9053   | -1.38082 |
| N | 5.52213  | 3.34812  | -1.19175 |
| C | 4.806153 | 2.405416 | -0.33236 |
| C | 4.153749 | 3.151881 | 0.853331 |
| C | 5.82835  | 1.389721 | 0.20455  |
| O | 4.831589 | 3.776499 | 1.663634 |
| C | 5.238096 | 0.221955 | 1.001941 |
| C | 4.657269 | -0.94896 | 0.208146 |
| O | 4.334891 | -1.98742 | 0.828424 |
| O | 4.580102 | -0.80807 | -1.06701 |
| H | 6.468187 | 3.120147 | -1.49454 |
| H | 4.035464 | 1.890981 | -0.91785 |
| H | 6.407147 | 0.993663 | -0.6374  |
| H | 6.515122 | 1.945107 | 0.852642 |
| H | 4.457526 | 0.557197 | 1.698219 |
| H | 6.021704 | -0.21701 | 1.629441 |
| N | 2.798443 | 3.054026 | 0.923756 |
| H | 2.31415  | 2.437017 | 0.276499 |
| C | 2.024451 | 3.630103 | 2.01999  |
| H | 0.973625 | 3.517245 | 1.730904 |
| C | 2.188034 | 2.835063 | 3.323574 |
| H | 3.24333  | 2.671595 | 3.551447 |
| H | 1.759084 | 3.423975 | 4.142108 |
| C | 1.437277 | 1.50225  | 3.230937 |

|   |          |          |          |
|---|----------|----------|----------|
| O | 0.337688 | 1.516398 | 2.619077 |
| O | 1.956745 | 0.484081 | 3.800867 |
| C | 2.225054 | 5.141429 | 2.225515 |
| O | 1.900099 | 5.664589 | 3.298254 |
| N | 2.632619 | 5.879674 | 1.159686 |
| H | 2.993292 | 5.404999 | 0.331826 |
| C | 3.009239 | 7.280247 | 1.358833 |
| H | 3.482657 | 7.362445 | 2.343718 |
| C | 4.000659 | 7.74617  | 0.288696 |
| H | 4.926822 | 7.167775 | 0.355123 |
| H | 4.222532 | 8.803549 | 0.451786 |
| H | 3.588748 | 7.619017 | -0.71769 |
| C | 1.816236 | 8.252076 | 1.445407 |
| O | 1.996694 | 9.417688 | 1.782183 |
| N | 0.591406 | 7.7299   | 1.151124 |
| H | 0.550312 | 6.764128 | 0.851669 |
| C | -0.64424 | 8.4578   | 1.365155 |
| H | -0.34085 | 9.492422 | 1.561619 |
| C | -1.55811 | 8.452637 | 0.117204 |
| H | -1.05059 | 9.028496 | -0.66476 |
| H | -2.47001 | 8.988663 | 0.394046 |
| C | -1.90016 | 7.072953 | -0.40871 |
| C | -1.13214 | 6.482923 | -1.4233  |
| H | -0.29361 | 7.032023 | -1.84584 |
| C | -1.43426 | 5.207831 | -1.90877 |
| H | -0.81654 | 4.780084 | -2.69525 |
| C | -2.51752 | 4.498264 | -1.38596 |
| H | -2.76149 | 3.507614 | -1.76139 |
| C | -3.2896  | 5.074603 | -0.37283 |
| H | -4.1356  | 4.528861 | 0.038133 |
| C | -2.98452 | 6.347767 | 0.112049 |
| H | -3.58307 | 6.793455 | 0.90148  |
| C | -1.41474 | 8.006162 | 2.631395 |
| O | -2.58553 | 8.359843 | 2.797181 |
| N | -0.70907 | 7.277132 | 3.527661 |
| H | 0.242215 | 6.988596 | 3.313119 |
| C | -1.24957 | 6.875552 | 4.818556 |
| H | -2.17944 | 7.430329 | 4.96009  |
| C | -1.46994 | 5.359498 | 4.939008 |
| H | -0.50621 | 4.861738 | 4.766927 |
| H | -1.75372 | 5.142531 | 5.981273 |
| C | -2.52267 | 4.751096 | 3.993687 |
| H | -2.2337  | 4.997754 | 2.962603 |
| C | -2.52454 | 3.220335 | 4.122812 |
| H | -3.28464 | 2.772158 | 3.472459 |
| H | -1.55569 | 2.788256 | 3.848222 |
| H | -2.75248 | 2.921165 | 5.157206 |



|   |          |          |          |
|---|----------|----------|----------|
| C | -3.92709 | 5.328773 | 4.230957 |
| H | -4.65374 | 4.842149 | 3.566428 |
| H | -4.25382 | 5.162776 | 5.268206 |
| H | -3.96478 | 6.402868 | 4.024117 |
| C | -5.48867 | 0.293339 | -4.75314 |
| H | -4.88217 | 0.115557 | -5.64867 |
| C | -4.60694 | 0.057162 | -3.51382 |
| H | -5.04815 | 0.517742 | -2.62742 |
| H | -4.5082  | -1.01588 | -3.30984 |
| C | -3.17638 | 0.587484 | -3.67816 |
| O | -2.6109  | 0.446495 | -4.80935 |
| O | -2.63593 | 1.104431 | -2.66366 |
| C | -6.72526 | -0.5883  | -4.81164 |
| O | -7.8742  | -0.14036 | -4.79947 |
| N | -6.48605 | -1.93693 | -4.88464 |
| H | -5.53036 | -2.29075 | -4.83977 |
| C | -7.55577 | -2.86819 | -5.19087 |
| H | -8.1725  | -2.47858 | -6.00856 |
| C | -8.53512 | -3.1964  | -4.0607  |
| O | -9.46697 | -3.97794 | -4.26134 |
| N | -8.31576 | -2.58317 | -2.87097 |
| H | -7.48409 | -2.01494 | -2.77796 |
| C | -9.25273 | -2.66557 | -1.76149 |
| H | -10.1444 | -3.15403 | -2.16938 |
| C | -8.6912  | -3.49177 | -0.59502 |
| H | -9.46421 | -3.56901 | 0.177279 |
| H | -7.84666 | -2.96574 | -0.14065 |
| C | -8.20554 | -4.88898 | -0.95907 |
| O | -7.20513 | -5.37774 | -0.40839 |
| N | -8.93182 | -5.60128 | -1.85262 |
| H | -9.50088 | -5.14322 | -2.56279 |
| H | -8.55482 | -6.5085  | -2.09864 |
| C | -9.74046 | -1.28608 | -1.25398 |
| O | -10.2868 | -1.21468 | -0.15799 |
| N | -9.56102 | -0.24167 | -2.10205 |
| H | -9.15106 | -0.40081 | -3.01867 |
| C | -10.1159 | 1.082488 | -1.83931 |
| H | -10.6595 | 1.015625 | -0.89454 |
| C | -9.05082 | 2.199113 | -1.78615 |
| H | -8.41065 | 2.108386 | -2.6729  |
| H | -9.58171 | 3.15477  | -1.88516 |
| C | -8.20871 | 2.224634 | -0.52781 |
| C | -6.96274 | 1.587495 | -0.46325 |
| H | -6.59205 | 1.06572  | -1.34089 |
| C | -6.16935 | 1.621757 | 0.683978 |
| H | -5.18624 | 1.1569   | 0.698501 |
| C | -6.64239 | 2.299105 | 1.810401 |

|   |          |          |          |
|---|----------|----------|----------|
| O | -5.85004 | 2.294483 | 2.944521 |
| H | -6.13405 | 3.007818 | 3.538732 |
| C | -7.88284 | 2.941005 | 1.779621 |
| H | -8.24658 | 3.471698 | 2.657443 |
| C | -8.64968 | 2.904459 | 0.615241 |
| H | -9.60675 | 3.421188 | 0.59907  |
| C | 1.924818 | 6.046227 | -4.1241  |
| H | 2.190471 | 6.322097 | -3.09654 |
| H | 0.839283 | 6.125411 | -4.2318  |
| C | 2.393212 | 4.613961 | -4.3492  |
| O | 3.542849 | 4.461146 | -4.88892 |
| O | 1.660339 | 3.663169 | -3.97654 |
| C | 8.816509 | -4.17662 | -4.73902 |
| C | 7.797128 | -3.52878 | -3.86079 |
| C | 6.50808  | -3.1225  | -4.09007 |
| N | 8.031828 | -3.20299 | -2.53328 |
| C | 6.919831 | -2.62445 | -2.01759 |
| N | 5.975284 | -2.55949 | -2.94243 |
| H | 9.136621 | -5.15103 | -4.34815 |
| H | 8.39621  | -4.34085 | -5.73493 |
| H | 5.918051 | -3.20807 | -4.98981 |
| H | 6.858327 | -2.32198 | -0.98022 |
| H | 8.884912 | -3.36477 | -2.01643 |
| C | 4.467265 | -7.68759 | 0.963625 |
| H | 5.198854 | -8.02947 | 0.220637 |
| C | 3.901769 | -6.31508 | 0.533656 |
| H | 4.710707 | -5.57238 | 0.510647 |
| H | 3.542593 | -6.39579 | -0.49985 |
| C | 2.766073 | -5.80553 | 1.430968 |
| H | 1.971205 | -6.5643  | 1.480131 |
| H | 3.120981 | -5.67301 | 2.459098 |
| C | 2.188587 | -4.48334 | 0.912075 |
| H | 2.965967 | -3.72204 | 0.841156 |
| H | 1.805656 | -4.60366 | -0.10802 |
| N | 1.100235 | -3.99558 | 1.762353 |
| H | 0.271858 | -4.5746  | 1.81669  |
| C | 1.025974 | -2.83233 | 2.437228 |
| N | 2.023395 | -1.96519 | 2.511793 |
| H | 2.880696 | -2.06446 | 1.963854 |
| H | 1.889436 | -1.06106 | 3.010633 |
| N | -0.16753 | -2.53869 | 3.017039 |
| H | -0.7866  | -3.33909 | 3.215043 |
| H | -0.19031 | -1.83342 | 3.762183 |
| C | 5.105611 | -7.6341  | 2.345853 |
| O | 4.478099 | -7.84355 | 3.378414 |
| N | 6.439497 | -7.30253 | 2.349084 |
| H | 6.851908 | -6.9222  | 1.505082 |

|    |          |          |          |
|----|----------|----------|----------|
| C  | 7.104828 | -6.90421 | 3.567563 |
| H  | 6.356753 | -6.88408 | 4.366969 |
| C  | 7.777495 | -5.54067 | 3.369974 |
| O  | 7.981278 | -5.10316 | 2.231008 |
| N  | 8.162654 | -4.9088  | 4.498866 |
| H  | 7.895727 | -5.31856 | 5.383735 |
| C  | 8.886127 | -3.63253 | 4.514286 |
| H  | 9.491384 | -3.60024 | 3.604828 |
| C  | 7.979563 | -2.39269 | 4.57633  |
| H  | 8.622853 | -1.50517 | 4.536246 |
| H  | 7.36476  | -2.36603 | 3.670921 |
| C  | 7.114405 | -2.32552 | 5.839104 |
| H  | 6.482287 | -3.2174  | 5.936603 |
| H  | 7.748132 | -2.27853 | 6.733574 |
| S  | 6.034771 | -0.84454 | 5.937967 |
| C  | 4.714953 | -1.31391 | 4.764376 |
| H  | 4.012432 | -0.47778 | 4.703018 |
| H  | 5.109354 | -1.50128 | 3.761743 |
| H  | 4.176937 | -2.19955 | 5.118324 |
| O  | 2.322307 | -1.16866 | -2.62365 |
| O  | 7.111559 | -2.60092 | 1.167321 |
| Fe | 3.956765 | -1.7359  | -2.68903 |
| C  | -0.13649 | -2.69419 | -5.55133 |
| H  | 0.314619 | -3.1417  | -6.44596 |
| H  | 0.158497 | -3.31938 | -4.70364 |
| C  | -1.66389 | -2.8519  | -5.67483 |
| H  | -1.86776 | -3.71207 | -6.32345 |
| C  | -2.47945 | -3.11135 | -4.37132 |
| O  | -1.84468 | -3.33768 | -3.32841 |
| O  | -3.7433  | -3.08975 | -4.53961 |
| N  | -2.37275 | -1.68866 | -6.33722 |
| H  | -2.43532 | -0.80701 | -5.69936 |
| H  | -3.34561 | -1.99093 | -6.45408 |
| H  | -1.97247 | -1.43439 | -7.24337 |
| C  | 0.470179 | -1.28952 | -5.39282 |
| H  | 0.090981 | -0.6319  | -6.19262 |
| H  | 1.544307 | -1.38695 | -5.59105 |
| C  | 0.291042 | -0.58532 | -4.04333 |
| H  | 1.207014 | -0.92993 | -3.34801 |
| H  | -0.60957 | -0.8954  | -3.50652 |
| C  | 0.360673 | 0.920219 | -4.2294  |
| H  | 1.3286   | 1.247737 | -4.6076  |
| H  | -0.40746 | 1.225972 | -4.94372 |
| N  | 0.083098 | 1.69962  | -2.98477 |
| H  | 7.877689 | -7.6313  | 3.859091 |
| H  | 9.56876  | -3.65895 | 5.371914 |
| H  | -3.20826 | -7.74028 | 3.206468 |

|   |          |          |          |
|---|----------|----------|----------|
| H | 3.66206  | -8.42776 | 1.007214 |
| H | -7.69633 | -1.46093 | 4.570952 |
| H | -4.35336 | 1.01928  | 6.228302 |
| H | 9.713275 | -3.55447 | -4.85476 |
| H | 8.27757  | 2.271523 | -5.06733 |
| H | 2.421991 | 6.738087 | -4.809   |
| H | 5.388241 | 6.214778 | -2.85883 |
| H | -0.54794 | 7.196138 | 5.599527 |
| H | -5.83043 | 1.33054  | -4.79244 |
| H | -7.11583 | -3.81062 | -5.52839 |
| H | -10.8369 | 1.318148 | -2.63287 |
| H | 7.452765 | -3.45648 | 1.493282 |
| H | 6.139823 | -2.65333 | 1.245865 |
| C | 3.242808 | -4.03706 | -3.40994 |
| O | 3.417706 | -3.73985 | -2.18438 |
| O | 3.472801 | -3.1705  | -4.30699 |
| C | 2.747205 | -5.41797 | -3.77797 |
| H | 2.768583 | -5.56232 | -4.85992 |
| H | 1.720563 | -5.54125 | -3.41458 |
| H | 3.363509 | -6.17844 | -3.28804 |
| H | 0.429204 | 2.667502 | -3.15304 |
| H | -0.94633 | 1.655438 | -2.80228 |
| H | 0.576173 | 1.322185 | -2.13706 |
| O | 1.386743 | 0.670164 | -0.71968 |
| H | 1.844745 | -0.07383 | -1.1704  |
| H | 0.711704 | 0.258298 | -0.12286 |
| O | -3.16676 | -0.06263 | -0.08609 |
| H | -3.03954 | 0.427098 | -0.92896 |
| H | -2.29203 | -0.00222 | 0.374779 |
| O | -0.63961 | -0.24869 | 0.989905 |
| H | -0.63539 | -1.11036 | 1.448647 |
| H | -0.34567 | 0.402773 | 1.703825 |

<sup>5</sup>IM1<sub>B,C5</sub>

|   |          |          |          |
|---|----------|----------|----------|
| C | -3.36057 | -0.75159 | 6.189462 |
| H | -2.83925 | -0.42682 | 5.280488 |
| C | -2.34397 | -1.23841 | 7.22779  |
| H | -2.80584 | -1.26341 | 8.221027 |
| H | -2.05485 | -2.2664  | 6.998949 |
| C | -1.08374 | -0.36459 | 7.275049 |
| H | -1.33355 | 0.678671 | 7.509665 |
| H | -0.42619 | -0.71313 | 8.083461 |
| C | -0.27779 | -0.41749 | 5.973182 |
| O | -0.379   | -1.38603 | 5.202246 |
| N | 0.54566  | 0.614557 | 5.727572 |
| H | 0.591535 | 1.401483 | 6.358126 |
| H | 1.066181 | 0.658148 | 4.838374 |
| C | -4.38089 | -1.81244 | 5.764218 |
| O | -4.40985 | -2.95389 | 6.244966 |
| N | -5.23813 | -1.39831 | 4.802689 |
| H | -5.09835 | -0.47344 | 4.402375 |
| C | -6.21475 | -2.27322 | 4.156715 |
| H | -6.88876 | -1.62179 | 3.591629 |
| C | -5.59799 | -3.33525 | 3.22437  |
| H | -5.15507 | -4.12976 | 3.834688 |
| H | -6.42233 | -3.79631 | 2.661911 |
| C | -4.5265  | -2.7875  | 2.272937 |
| H | -3.70314 | -2.3764  | 2.868444 |
| H | -4.91127 | -1.95953 | 1.666793 |
| C | -3.92945 | -3.85153 | 1.343036 |
| H | -2.98825 | -3.49618 | 0.922957 |
| H | -3.70449 | -4.76322 | 1.912057 |
| N | -4.80431 | -4.21307 | 0.224049 |
| H | -5.65411 | -4.7474  | 0.412889 |
| C | -4.50113 | -4.0429  | -1.07394 |
| N | -3.48315 | -3.27822 | -1.47249 |
| H | -3.21848 | -2.42674 | -0.93587 |
| H | -3.2343  | -3.33517 | -2.46651 |
| N | -5.23015 | -4.69822 | -2.00298 |
| H | -5.96366 | -5.31986 | -1.68476 |
| H | -5.26137 | -4.30146 | -2.94535 |
| C | -1.21048 | -7.33998 | 2.750432 |
| H | -0.23515 | -7.73602 | 3.060486 |
| H | -1.10798 | -6.99312 | 1.714466 |
| C | -1.66244 | -6.23404 | 3.653178 |
| N | -0.9485  | -5.05434 | 3.78039  |
| C | -1.61649 | -4.3209  | 4.660483 |
| H | -1.33893 | -3.32791 | 4.992668 |
| N | -2.71919 | -4.96366 | 5.11037  |

|   |          |          |          |
|---|----------|----------|----------|
| H | -3.42341 | -4.5204  | 5.702656 |
| C | -2.76835 | -6.18598 | 4.471757 |
| H | -3.55226 | -6.90384 | 4.661575 |
| C | 6.261476 | 2.793011 | -6.24198 |
| C | 6.151448 | 3.61129  | -4.95528 |
| C | 5.062824 | 1.88047  | -6.59334 |
| O | 7.015389 | 3.52278  | -4.07707 |
| C | 4.703587 | 0.8849   | -5.52805 |
| C | 5.277299 | -0.29065 | -5.10327 |
| N | 3.597709 | 1.069957 | -4.72221 |
| C | 3.526392 | 0.038456 | -3.86394 |
| N | 4.535104 | -0.81333 | -4.06273 |
| H | 6.425167 | 3.486569 | -7.07747 |
| H | 4.176277 | 2.484224 | -6.81641 |
| H | 5.314837 | 1.351232 | -7.52025 |
| H | 6.167067 | -0.78333 | -5.46346 |
| H | 2.763157 | -0.06729 | -3.1077  |
| H | 2.982831 | 1.936383 | -4.77152 |
| N | 5.113169 | 4.492927 | -4.86285 |
| H | 4.228496 | 4.287315 | -5.33105 |
| C | 5.009948 | 5.380154 | -3.70813 |
| H | 6.025762 | 5.644418 | -3.40095 |
| C | 4.249825 | 4.760901 | -2.52767 |
| O | 3.217555 | 5.27897  | -2.08803 |
| N | 4.777727 | 3.611505 | -2.05041 |
| C | 4.016401 | 2.680719 | -1.21942 |
| C | 3.499446 | 3.366368 | 0.06185  |
| C | 4.919991 | 1.493677 | -0.85568 |
| O | 4.263404 | 3.775388 | 0.929651 |
| C | 4.183087 | 0.3809   | -0.08682 |
| C | 4.985606 | -0.91289 | -0.03513 |
| O | 5.226313 | -1.47743 | 1.051112 |
| O | 5.411182 | -1.38154 | -1.16587 |
| H | 5.653535 | 3.297906 | -2.46336 |
| H | 3.158544 | 2.322456 | -1.8046  |
| H | 5.334633 | 1.075874 | -1.77907 |
| H | 5.751655 | 1.874537 | -0.2518  |
| H | 3.224789 | 0.151001 | -0.57423 |
| H | 3.965966 | 0.6948   | 0.937278 |
| N | 2.143599 | 3.420165 | 0.152401 |
| H | 1.59559  | 3.117643 | -0.64192 |
| C | 1.423396 | 3.893756 | 1.328503 |
| H | 0.363131 | 3.762341 | 1.086306 |
| C | 1.708768 | 3.035884 | 2.566662 |
| H | 2.775214 | 3.046342 | 2.802044 |
| H | 1.188713 | 3.478702 | 3.423535 |
| C | 1.235688 | 1.590207 | 2.377571 |

|   |          |          |          |
|---|----------|----------|----------|
| O | 0.380467 | 1.367332 | 1.488739 |
| O | 1.751551 | 0.715099 | 3.157404 |
| C | 1.603729 | 5.395231 | 1.611083 |
| O | 1.256344 | 5.870921 | 2.698762 |
| N | 2.033974 | 6.168335 | 0.581623 |
| H | 2.388596 | 5.725683 | -0.26566 |
| C | 2.281162 | 7.596089 | 0.773423 |
| H | 2.731547 | 7.728275 | 1.763986 |
| C | 3.240561 | 8.132905 | -0.29244 |
| H | 4.216275 | 7.645166 | -0.20607 |
| H | 3.36077  | 9.209298 | -0.14965 |
| H | 2.855875 | 7.947733 | -1.30086 |
| C | 0.999095 | 8.456762 | 0.833501 |
| O | 1.070138 | 9.649276 | 1.110171 |
| N | -0.17014 | 7.799639 | 0.595121 |
| H | -0.11929 | 6.822591 | 0.339453 |
| C | -1.47942 | 8.392979 | 0.782208 |
| H | -1.32294 | 9.477102 | 0.798322 |
| C | -2.43366 | 8.046971 | -0.38714 |
| H | -2.04186 | 8.529116 | -1.29006 |
| H | -3.39921 | 8.501547 | -0.15101 |
| C | -2.59591 | 6.558715 | -0.62616 |
| C | -1.72031 | 5.866828 | -1.47818 |
| H | -0.9437  | 6.417544 | -2.0055  |
| C | -1.83434 | 4.486573 | -1.67136 |
| H | -1.13155 | 3.97577  | -2.32608 |
| C | -2.84629 | 3.776164 | -1.02039 |
| H | -2.94871 | 2.706577 | -1.18137 |
| C | -3.73138 | 4.453448 | -0.17671 |
| H | -4.52505 | 3.906488 | 0.327057 |
| C | -3.60496 | 5.82995  | 0.022968 |
| H | -4.28689 | 6.352661 | 0.687974 |
| C | -2.13388 | 8.050229 | 2.14573  |
| O | -3.3156  | 8.344111 | 2.343302 |
| N | -1.32899 | 7.476178 | 3.071563 |
| H | -0.38046 | 7.208322 | 2.821894 |
| C | -1.76479 | 7.206882 | 4.434784 |
| H | -2.79366 | 7.56439  | 4.509808 |
| C | -1.64294 | 5.726998 | 4.828149 |
| H | -0.58515 | 5.439484 | 4.76589  |
| H | -1.93365 | 5.638558 | 5.886664 |
| C | -2.4686  | 4.736608 | 3.986419 |
| H | -2.13177 | 4.823863 | 2.944755 |
| C | -2.19459 | 3.297232 | 4.448677 |
| H | -2.69581 | 2.56733  | 3.802967 |
| H | -1.12368 | 3.063961 | 4.431469 |
| H | -2.54773 | 3.145623 | 5.480493 |

|   |          |          |          |
|---|----------|----------|----------|
| C | -3.97391 | 5.04344  | 4.0139   |
| H | -4.52796 | 4.312055 | 3.410191 |
| H | -4.36605 | 5.007498 | 5.041415 |
| H | -4.19503 | 6.033735 | 3.603301 |
| C | -6.39975 | 0.484182 | -3.872   |
| H | -6.08928 | 0.513051 | -4.92339 |
| C | -5.2422  | -0.07949 | -3.0244  |
| H | -5.3349  | 0.237639 | -1.98327 |
| H | -5.25083 | -1.1763  | -3.03063 |
| C | -3.84668 | 0.317381 | -3.52818 |
| O | -3.62954 | 0.337042 | -4.78482 |
| O | -2.97247 | 0.560753 | -2.65874 |
| C | -7.70166 | -0.29971 | -3.7728  |
| O | -8.76038 | 0.208312 | -3.39297 |
| N | -7.63722 | -1.61508 | -4.15428 |
| H | -6.73628 | -2.06582 | -4.33322 |
| C | -8.83538 | -2.42187 | -4.29264 |
| H | -9.62278 | -1.83053 | -4.77291 |
| C | -9.45923 | -2.97404 | -3.00719 |
| O | -10.414  | -3.75105 | -3.06618 |
| N | -8.92141 | -2.5383  | -1.84048 |
| H | -8.10061 | -1.95009 | -1.88831 |
| C | -9.5434  | -2.77492 | -0.54689 |
| H | -10.5134 | -3.23399 | -0.7668  |
| C | -8.70632 | -3.71639 | 0.327996 |
| H | -9.23519 | -3.86873 | 1.27541  |
| H | -7.75067 | -3.24566 | 0.578256 |
| C | -8.38373 | -5.07426 | -0.28344 |
| O | -7.32035 | -5.65475 | -0.00995 |
| N | -9.31156 | -5.65271 | -1.08068 |
| H | -10.0109 | -5.1092  | -1.58452 |
| H | -9.04902 | -6.54132 | -1.48909 |
| C | -9.87743 | -1.46911 | 0.219095 |
| O | -10.1061 | -1.5227  | 1.423033 |
| N | -9.9445  | -0.34502 | -0.53766 |
| H | -9.74774 | -0.39135 | -1.53327 |
| C | -10.3725 | 0.943674 | -0.00686 |
| H | -10.637  | 0.784139 | 1.040689 |
| C | -9.29574 | 2.04226  | -0.14588 |
| H | -8.93864 | 2.046632 | -1.18333 |
| H | -9.79011 | 3.007663 | 0.020371 |
| C | -8.13839 | 1.895068 | 0.8171   |
| C | -6.99608 | 1.151856 | 0.488822 |
| H | -6.92713 | 0.701098 | -0.49743 |
| C | -5.93609 | 0.991946 | 1.382736 |
| H | -5.03699 | 0.447531 | 1.103374 |
| C | -6.02573 | 1.58118  | 2.646086 |



|   |          |          |          |
|---|----------|----------|----------|
| O | -4.98282 | 1.368911 | 3.531388 |
| H | -4.9813  | 2.073933 | 4.199483 |
| C | -7.14698 | 2.334739 | 2.999187 |
| H | -7.2076  | 2.79759  | 3.981884 |
| C | -8.18745 | 2.489392 | 2.084396 |
| H | -9.05332 | 3.084052 | 2.366348 |
| C | 0.924273 | 5.215248 | -4.5376  |
| H | 1.367037 | 5.808493 | -3.72947 |
| H | -0.16393 | 5.268674 | -4.44274 |
| C | 1.407567 | 3.778472 | -4.37869 |
| O | 2.389447 | 3.408443 | -5.10289 |
| O | 0.831905 | 3.052058 | -3.52068 |
| C | 10.02871 | -3.29742 | -5.27598 |
| C | 8.933466 | -2.97343 | -4.31413 |
| C | 7.571812 | -2.90513 | -4.45496 |
| N | 9.159535 | -2.65305 | -2.98293 |
| C | 7.971302 | -2.40616 | -2.37886 |
| N | 6.98751  | -2.54523 | -3.25367 |
| H | 10.62002 | -4.1624  | -4.94911 |
| H | 9.603924 | -3.53737 | -6.25456 |
| H | 6.969394 | -3.11254 | -5.32689 |
| H | 7.87047  | -2.19443 | -1.32024 |
| H | 10.05733 | -2.62226 | -2.52064 |
| C | 6.817933 | -6.3323  | 2.049914 |
| H | 7.623357 | -6.5962  | 1.349702 |
| C | 5.782092 | -5.47752 | 1.301686 |
| H | 6.248554 | -4.56478 | 0.918516 |
| H | 5.46526  | -6.03413 | 0.410344 |
| C | 4.545057 | -5.11636 | 2.135253 |
| H | 4.098099 | -6.02688 | 2.560018 |
| H | 4.828246 | -4.48035 | 2.983603 |
| C | 3.505164 | -4.38546 | 1.276377 |
| H | 3.932123 | -3.46934 | 0.866803 |
| H | 3.226114 | -5.00066 | 0.413407 |
| N | 2.273143 | -4.05182 | 1.996366 |
| H | 1.62799  | -4.80635 | 2.194942 |
| C | 1.893437 | -2.84163 | 2.444656 |
| N | 2.680311 | -1.77707 | 2.43325  |
| H | 3.635093 | -1.79288 | 2.071751 |
| H | 2.275055 | -0.84776 | 2.672694 |
| N | 0.610442 | -2.70889 | 2.879519 |
| H | 0.103203 | -3.58849 | 3.049505 |
| H | 0.431218 | -2.00172 | 3.604219 |
| C | 7.478533 | -5.72532 | 3.288656 |
| O | 7.577934 | -6.3597  | 4.337813 |
| N | 7.998154 | -4.46672 | 3.155243 |
| H | 7.969076 | -3.96918 | 2.262127 |

|    |          |          |          |
|----|----------|----------|----------|
| C  | 8.795235 | -3.93058 | 4.238365 |
| H  | 8.36034  | -4.27816 | 5.180046 |
| C  | 8.919828 | -2.40969 | 4.201198 |
| O  | 8.993985 | -1.75788 | 3.155429 |
| N  | 9.035026 | -1.82205 | 5.418017 |
| H  | 8.911042 | -2.39234 | 6.241905 |
| C  | 9.271313 | -0.38537 | 5.579649 |
| H  | 10.03131 | -0.09103 | 4.849638 |
| C  | 8.013734 | 0.474894 | 5.378984 |
| H  | 8.303611 | 1.531467 | 5.426551 |
| H  | 7.641562 | 0.294873 | 4.366116 |
| C  | 6.913255 | 0.202665 | 6.408385 |
| H  | 6.681689 | -0.86832 | 6.459845 |
| H  | 7.235134 | 0.514911 | 7.409364 |
| S  | 5.351922 | 1.113959 | 6.09347  |
| C  | 4.738331 | 0.201901 | 4.633711 |
| H  | 3.798463 | 0.665063 | 4.321726 |
| H  | 5.440495 | 0.251644 | 3.796451 |
| H  | 4.54559  | -0.84627 | 4.885576 |
| O  | 3.032476 | -2.59485 | -2.24915 |
| O  | 7.825743 | -2.63964 | 0.794428 |
| Fe | 4.85619  | -2.44116 | -2.69075 |
| C  | -2.32111 | -2.6     | -6.95233 |
| H  | -2.37245 | -2.7366  | -8.04102 |
| H  | -1.80707 | -3.47852 | -6.5497  |
| C  | -3.75297 | -2.67326 | -6.40731 |
| H  | -4.31268 | -3.38878 | -7.02183 |
| C  | -3.95303 | -3.14286 | -4.93501 |
| O  | -2.96703 | -3.55991 | -4.3079  |
| O  | -5.16476 | -3.07678 | -4.53935 |
| N  | -4.50321 | -1.36703 | -6.51725 |
| H  | -4.14675 | -0.61223 | -5.76904 |
| H  | -5.47745 | -1.56456 | -6.27241 |
| H  | -4.4658  | -0.96818 | -7.45849 |
| C  | -1.47649 | -1.3407  | -6.68373 |
| H  | -2.01046 | -0.43992 | -7.0324  |
| H  | -0.60473 | -1.41047 | -7.36088 |
| C  | -1.00845 | -1.1148  | -5.28348 |
| H  | 2.626475 | -3.23754 | -2.85401 |
| H  | -1.06547 | -1.91086 | -4.54832 |
| C  | -0.26054 | 0.141687 | -4.99427 |
| H  | 0.810722 | 0.053947 | -5.23632 |
| H  | -0.65158 | 0.966635 | -5.60057 |
| N  | -0.34004 | 0.578793 | -3.57133 |
| H  | 9.822966 | -4.33245 | 4.212659 |
| H  | 9.691592 | -0.23846 | 6.58095  |
| H  | -1.92509 | -8.16899 | 2.757566 |

|   |          |          |          |
|---|----------|----------|----------|
| H | 6.37115  | -7.27217 | 2.389253 |
| H | -6.80664 | -2.77122 | 4.93165  |
| H | -3.90131 | 0.129321 | 6.562309 |
| H | 10.71906 | -2.4548  | -5.41085 |
| H | 7.16578  | 2.189826 | -6.12854 |
| H | 1.239466 | 5.634699 | -5.49677 |
| H | 4.473279 | 6.285133 | -3.99847 |
| H | -1.15759 | 7.806712 | 5.126839 |
| H | -6.62462 | 1.513054 | -3.58129 |
| H | -8.61563 | -3.27341 | -4.94186 |
| H | -11.2764 | 1.258156 | -0.54462 |
| H | 8.317111 | -2.14174 | 1.48183  |
| H | 6.898409 | -2.32355 | 0.883784 |
| C | 4.968568 | -4.88629 | -3.30888 |
| O | 5.232179 | -4.52884 | -2.12281 |
| O | 4.622394 | -4.00662 | -4.16851 |
| C | 5.099644 | -6.33247 | -3.72489 |
| H | 6.08764  | -6.4801  | -4.17777 |
| H | 4.3456   | -6.58494 | -4.47498 |
| H | 5.01525  | -6.99229 | -2.85866 |
| H | 0.134745 | 1.513351 | -3.48635 |
| H | -1.34152 | 0.660546 | -3.26907 |
| H | 0.152756 | -0.07613 | -2.91184 |
| O | 1.107939 | -0.77812 | -1.6759  |
| H | 1.745718 | -1.5245  | -1.79647 |
| H | 0.627494 | -0.91585 | -0.82058 |
| O | -3.02802 | -0.86009 | -0.18817 |
| H | -3.01523 | -0.25933 | -0.96562 |
| H | -2.10684 | -0.83144 | 0.178283 |
| O | -0.39858 | -0.95858 | 0.623436 |
| H | -0.19911 | -1.63064 | 1.306136 |
| H | -0.10998 | -0.07777 | 1.036614 |

<sup>5</sup>TS2<sub>B,C5</sub>

|   |          |          |          |
|---|----------|----------|----------|
| C | -3.70152 | 1.192674 | 5.992086 |
| H | -3.08469 | 1.115176 | 5.088052 |
| C | -2.855   | 0.837134 | 7.218715 |
| H | -3.3942  | 1.112274 | 8.132462 |
| H | -2.71425 | -0.24554 | 7.261135 |
| C | -1.48348 | 1.522869 | 7.221267 |
| H | -1.58927 | 2.612889 | 7.132743 |
| H | -0.98634 | 1.344567 | 8.184773 |
| C | -0.53818 | 1.02793  | 6.120308 |
| O | -0.80194 | 0.025024 | 5.438269 |
| N | 0.604658 | 1.719351 | 5.962874 |
| H | 0.763679 | 2.57508  | 6.474848 |
| H | 1.215707 | 1.506222 | 5.162656 |
| C | -4.91413 | 0.28193  | 5.789518 |
| O | -5.11827 | -0.73145 | 6.472822 |
| N | -5.73467 | 0.648192 | 4.774729 |
| H | -5.46983 | 1.433024 | 4.186386 |
| C | -6.82211 | -0.19488 | 4.27634  |
| H | -7.33421 | 0.392704 | 3.508963 |
| C | -6.36165 | -1.54817 | 3.695695 |
| H | -6.12688 | -2.22046 | 4.527618 |
| H | -7.21491 | -1.9883  | 3.160979 |
| C | -5.13393 | -1.44788 | 2.782018 |
| H | -4.34251 | -0.91402 | 3.319202 |
| H | -5.34649 | -0.85288 | 1.886698 |
| C | -4.55275 | -2.80797 | 2.371244 |
| H | -3.4941  | -2.70462 | 2.125735 |
| H | -4.61259 | -3.51368 | 3.207698 |
| N | -5.20491 | -3.43653 | 1.216842 |
| H | -6.04635 | -4.00124 | 1.359282 |
| C | -4.60621 | -3.57342 | 0.022905 |
| N | -3.54714 | -2.84357 | -0.32244 |
| H | -3.39662 | -1.87396 | 0.018415 |
| H | -3.00355 | -3.1609  | -1.13403 |
| N | -5.08961 | -4.48509 | -0.84878 |
| H | -5.75241 | -5.17655 | -0.52281 |
| H | -4.74979 | -4.49001 | -1.81122 |
| C | -2.20205 | -6.14555 | 4.439287 |
| H | -1.2275  | -6.45527 | 4.836904 |
| H | -2.12187 | -6.14271 | 3.344644 |
| C | -2.59984 | -4.79995 | 4.962035 |
| N | -1.84163 | -3.66713 | 4.720691 |
| C | -2.46884 | -2.67453 | 5.336008 |
| H | -2.13211 | -1.64621 | 5.373464 |
| N | -3.59003 | -3.10429 | 5.960916 |

|   |          |          |          |
|---|----------|----------|----------|
| H | -4.25561 | -2.47266 | 6.408459 |
| C | -3.69298 | -4.46064 | 5.727951 |
| H | -4.50076 | -5.05489 | 6.128234 |
| C | 7.099514 | 1.799568 | -6.10429 |
| C | 6.938403 | 2.712712 | -4.88632 |
| C | 5.831845 | 1.061568 | -6.60759 |
| O | 7.653382 | 2.555845 | -3.89052 |
| C | 5.093102 | 0.307215 | -5.54169 |
| C | 5.195315 | -0.96207 | -5.01024 |
| N | 4.099944 | 0.93091  | -4.81942 |
| C | 3.646699 | 0.057707 | -3.90541 |
| N | 4.278689 | -1.11005 | -3.98949 |
| H | 7.507866 | 2.39362  | -6.93293 |
| H | 5.140023 | 1.775151 | -7.07141 |
| H | 6.143924 | 0.373721 | -7.40173 |
| H | 5.862882 | -1.76675 | -5.28326 |
| H | 2.902047 | 0.300625 | -3.16601 |
| H | 3.69784  | 1.887767 | -5.05414 |
| N | 6.039132 | 3.732742 | -4.9717  |
| H | 5.238128 | 3.676836 | -5.59903 |
| C | 5.877836 | 4.675337 | -3.86877 |
| H | 6.868846 | 4.878309 | -3.45185 |
| C | 4.942032 | 4.188159 | -2.75112 |
| O | 3.909861 | 4.804661 | -2.45829 |
| N | 5.327857 | 3.049819 | -2.13552 |
| C | 4.457754 | 2.337519 | -1.20802 |
| C | 4.076394 | 3.242639 | -0.01817 |
| C | 5.150077 | 1.047968 | -0.73734 |
| O | 4.91544  | 3.795826 | 0.681455 |
| C | 4.265779 | 0.218582 | 0.213277 |
| C | 4.569667 | -1.27904 | 0.203684 |
| O | 4.740293 | -1.86415 | 1.311305 |
| O | 4.608738 | -1.8739  | -0.92205 |
| H | 6.216382 | 2.638874 | -2.41625 |
| H | 3.538298 | 2.069427 | -1.74391 |
| H | 5.392533 | 0.448343 | -1.62118 |
| H | 6.091023 | 1.316453 | -0.24244 |
| H | 3.215244 | 0.312886 | -0.0915  |
| H | 4.343622 | 0.589809 | 1.238475 |
| N | 2.730088 | 3.374636 | 0.164472 |
| H | 2.112042 | 2.798003 | -0.39042 |
| C | 2.125746 | 4.125337 | 1.25811  |
| H | 1.045685 | 4.062076 | 1.085803 |
| C | 2.36856  | 3.469843 | 2.622699 |
| H | 3.432786 | 3.28579  | 2.784109 |
| H | 2.032669 | 4.157639 | 3.407508 |
| C | 1.578419 | 2.158711 | 2.736481 |

|   |          |          |          |
|---|----------|----------|----------|
| O | 0.520403 | 2.071479 | 2.059297 |
| O | 2.033968 | 1.265151 | 3.525064 |
| C | 2.43496  | 5.629187 | 1.239362 |
| O | 2.162268 | 6.325454 | 2.225174 |
| N | 2.865514 | 6.167067 | 0.069101 |
| H | 3.159368 | 5.557321 | -0.69365 |
| C | 3.220759 | 7.583472 | 0.00044  |
| H | 3.702032 | 7.85461  | 0.946652 |
| C | 4.189832 | 7.854454 | -1.15396 |
| H | 5.12955  | 7.317694 | -0.99272 |
| H | 4.391004 | 8.927363 | -1.20174 |
| H | 3.770703 | 7.525117 | -2.11014 |
| C | 2.004842 | 8.53132  | -0.07785 |
| O | 2.159297 | 9.74284  | 0.028815 |
| N | 0.789851 | 7.933549 | -0.2457  |
| H | 0.771983 | 6.92872  | -0.36048 |
| C | -0.46614 | 8.652529 | -0.16013 |
| H | -0.19853 | 9.714772 | -0.18893 |
| C | -1.3956  | 8.355122 | -1.36121 |
| H | -0.90804 | 8.74915  | -2.26004 |
| H | -2.31398 | 8.924665 | -1.19656 |
| C | -1.71986 | 6.887279 | -1.55826 |
| C | -0.91254 | 6.076602 | -2.37037 |
| H | -0.05657 | 6.514412 | -2.87894 |
| C | -1.19718 | 4.71994  | -2.55012 |
| H | -0.54729 | 4.12208  | -3.1853  |
| C | -2.30682 | 4.151951 | -1.92045 |
| H | -2.5456  | 3.10037  | -2.06317 |
| C | -3.12013 | 4.947251 | -1.10805 |
| H | -3.98648 | 4.510742 | -0.61697 |
| C | -2.82792 | 6.300424 | -0.92578 |
| H | -3.45514 | 6.916696 | -0.28812 |
| C | -1.2085  | 8.445016 | 1.184456 |
| O | -2.38323 | 8.806092 | 1.297474 |
| N | -0.47931 | 7.909808 | 2.191452 |
| H | 0.476181 | 7.606046 | 2.022767 |
| C | -0.99692 | 7.747024 | 3.542772 |
| H | -1.92581 | 8.318302 | 3.599479 |
| C | -1.2109  | 6.277295 | 3.938502 |
| H | -0.24975 | 5.755619 | 3.83653  |
| H | -1.46949 | 6.251779 | 5.009195 |
| C | -2.28496 | 5.511161 | 3.143509 |
| H | -2.02174 | 5.567279 | 2.07825  |
| C | -2.28256 | 4.028145 | 3.544851 |
| H | -3.06337 | 3.475016 | 3.009838 |
| H | -1.32378 | 3.547824 | 3.319748 |
| H | -2.47593 | 3.918933 | 4.622623 |

|   |          |          |          |
|---|----------|----------|----------|
| C | -3.68414 | 6.126094 | 3.306708 |
| H | -4.42653 | 5.527659 | 2.761344 |
| H | -3.98467 | 6.153906 | 4.364496 |
| H | -3.72852 | 7.143794 | 2.90673  |
| C | -5.47865 | -0.8402  | -4.71771 |
| H | -4.89871 | -1.3139  | -5.51801 |
| C | -4.65435 | -0.83059 | -3.41769 |
| H | -5.0989  | -0.14676 | -2.6915  |
| H | -4.64245 | -1.83005 | -2.96807 |
| C | -3.18784 | -0.43679 | -3.59422 |
| O | -2.5255  | -0.93413 | -4.57678 |
| O | -2.68737 | 0.324342 | -2.73355 |
| C | -6.80626 | -1.57242 | -4.56762 |
| O | -7.89687 | -1.00486 | -4.63592 |
| N | -6.70755 | -2.92101 | -4.34034 |
| H | -5.79118 | -3.34726 | -4.20542 |
| C | -7.87835 | -3.77802 | -4.38896 |
| H | -8.51007 | -3.49313 | -5.23743 |
| C | -8.80397 | -3.76931 | -3.16836 |
| O | -9.79866 | -4.49603 | -3.14919 |
| N | -8.47323 | -2.92524 | -2.15954 |
| H | -7.59427 | -2.42921 | -2.22404 |
| C | -9.35122 | -2.67389 | -1.02643 |
| H | -10.2977 | -3.16486 | -1.27691 |
| C | -8.79069 | -3.25378 | 0.279976 |
| H | -9.51995 | -3.06898 | 1.076462 |
| H | -7.87902 | -2.71974 | 0.563702 |
| C | -8.44938 | -4.73856 | 0.253936 |
| O | -7.48476 | -5.17874 | 0.901263 |
| N | -9.26071 | -5.56714 | -0.44331 |
| H | -9.82138 | -5.23861 | -1.22758 |
| H | -8.98405 | -6.54107 | -0.46257 |
| C | -9.70842 | -1.17856 | -0.83594 |
| O | -10.2057 | -0.81721 | 0.224918 |
| N | -9.47961 | -0.36882 | -1.90154 |
| H | -9.1261  | -0.76518 | -2.76743 |
| C | -9.92615 | 1.02043  | -1.93661 |
| H | -10.4897 | 1.195506 | -1.01765 |
| C | -8.77529 | 2.040501 | -2.07719 |
| H | -8.12797 | 1.720783 | -2.90385 |
| H | -9.22626 | 2.991385 | -2.38942 |
| C | -7.95821 | 2.264827 | -0.82176 |
| C | -6.74854 | 1.594914 | -0.5972  |
| H | -6.38385 | 0.89648  | -1.34587 |
| C | -5.98052 | 1.812193 | 0.547478 |
| H | -5.02482 | 1.310935 | 0.680834 |
| C | -6.44074 | 2.716461 | 1.507474 |

|   |          |          |          |
|---|----------|----------|----------|
| O | -5.67186 | 2.898094 | 2.642773 |
| H | -5.93689 | 3.722488 | 3.081842 |
| C | -7.64528 | 3.397686 | 1.314837 |
| H | -8.0002  | 4.105265 | 2.061666 |
| C | -8.38736 | 3.172343 | 0.155956 |
| H | -9.31581 | 3.720296 | 0.011357 |
| C | 1.677988 | 5.064065 | -5.21619 |
| H | 2.081405 | 5.592923 | -4.34385 |
| H | 0.588535 | 5.151662 | -5.20767 |
| C | 2.122918 | 3.611352 | -5.11098 |
| O | 3.262228 | 3.32354  | -5.60038 |
| O | 1.378785 | 2.779071 | -4.52278 |
| C | 8.080085 | -5.96572 | -4.7202  |
| C | 7.206173 | -5.13925 | -3.83492 |
| C | 5.995009 | -4.52897 | -4.04061 |
| N | 7.52833  | -4.83153 | -2.52147 |
| C | 6.535319 | -4.06909 | -1.99342 |
| N | 5.590867 | -3.86703 | -2.89541 |
| H | 8.244621 | -6.97259 | -4.31437 |
| H | 7.612558 | -6.07801 | -5.70252 |
| H | 5.372855 | -4.5389  | -4.92335 |
| H | 6.536786 | -3.7291  | -0.9653  |
| H | 8.353459 | -5.12972 | -2.02103 |
| C | 4.98377  | -7.16849 | 2.679486 |
| H | 5.64359  | -7.72039 | 1.994713 |
| C | 4.205561 | -6.11482 | 1.875488 |
| H | 4.902912 | -5.42309 | 1.392188 |
| H | 3.678084 | -6.62777 | 1.059827 |
| C | 3.186287 | -5.32586 | 2.709009 |
| H | 2.435168 | -6.01339 | 3.12603  |
| H | 3.681681 | -4.84712 | 3.562975 |
| C | 2.49466  | -4.24928 | 1.863694 |
| H | 3.22446  | -3.50819 | 1.532915 |
| H | 2.070047 | -4.68667 | 0.951741 |
| N | 1.414698 | -3.57155 | 2.590868 |
| H | 0.605235 | -4.13191 | 2.826478 |
| C | 1.348326 | -2.28544 | 2.979674 |
| N | 2.344897 | -1.42389 | 2.849402 |
| H | 3.235315 | -1.65806 | 2.39686  |
| H | 2.180253 | -0.42781 | 3.091449 |
| N | 0.153818 | -1.85542 | 3.477426 |
| H | -0.48516 | -2.58932 | 3.816046 |
| H | 0.148925 | -1.026   | 4.081722 |
| C | 5.854342 | -6.67979 | 3.839638 |
| O | 5.927048 | -7.31252 | 4.892752 |
| N | 6.582255 | -5.54169 | 3.642668 |
| H | 6.577739 | -5.03961 | 2.750629 |



|    |          |          |          |
|----|----------|----------|----------|
| C  | 7.504907 | -5.13838 | 4.68326  |
| H  | 6.981885 | -5.12155 | 5.646726 |
| C  | 8.163479 | -3.79198 | 4.394982 |
| O  | 8.408118 | -3.38286 | 3.257204 |
| N  | 8.534078 | -3.09524 | 5.498964 |
| H  | 8.257735 | -3.44213 | 6.406094 |
| C  | 9.224427 | -1.807   | 5.410785 |
| H  | 9.959642 | -1.88526 | 4.605143 |
| C  | 8.282615 | -0.6244  | 5.13142  |
| H  | 8.889357 | 0.272827 | 4.959658 |
| H  | 7.750289 | -0.82931 | 4.197129 |
| C  | 7.289894 | -0.3549  | 6.266156 |
| H  | 6.735232 | -1.26504 | 6.526839 |
| H  | 7.82029  | -0.02856 | 7.169194 |
| S  | 6.07586  | 0.974322 | 5.911604 |
| C  | 4.972368 | 0.107978 | 4.740679 |
| H  | 4.172656 | 0.801473 | 4.465757 |
| H  | 5.493809 | -0.19835 | 3.828914 |
| H  | 4.521679 | -0.77066 | 5.214498 |
| O  | 1.740259 | -1.92891 | -2.38761 |
| O  | 6.656697 | -3.88324 | 1.161167 |
| Fe | 3.746098 | -2.67896 | -2.59097 |
| C  | -0.42966 | -3.9505  | -4.80351 |
| H  | 0.046058 | -4.5719  | -5.57047 |
| H  | -0.13417 | -4.37092 | -3.8397  |
| C  | -1.94836 | -4.14914 | -4.88575 |
| H  | -2.14539 | -5.16215 | -5.25347 |
| C  | -2.74599 | -4.00024 | -3.55455 |
| O  | -2.0882  | -3.83371 | -2.51301 |
| O  | -4.00747 | -4.07985 | -3.69711 |
| N  | -2.66083 | -3.21879 | -5.84227 |
| H  | -2.67228 | -2.21445 | -5.41469 |
| H  | -3.6383  | -3.52895 | -5.85958 |
| H  | -2.27345 | -3.22282 | -6.789   |
| C  | 0.19738  | -2.55436 | -4.94681 |
| H  | 0.007249 | -2.12089 | -5.94085 |
| H  | 1.285285 | -2.72749 | -4.90985 |
| C  | -0.07569 | -1.51031 | -3.92461 |
| H  | 1.380739 | -2.73568 | -1.975   |
| H  | -0.66681 | -1.73039 | -3.04657 |
| C  | 0.274676 | -0.114   | -4.28929 |
| H  | 1.335729 | -0.04259 | -4.5398  |
| H  | -0.2776  | 0.141487 | -5.19955 |
| N  | -0.04513 | 0.903626 | -3.26708 |
| H  | 8.309564 | -5.88286 | 4.797489 |
| H  | 9.767905 | -1.6623  | 6.351461 |
| H  | -2.93526 | -6.9084  | 4.71944  |

|   |          |          |          |
|---|----------|----------|----------|
| H | 4.30435  | -7.90642 | 3.118602 |
| H | -7.5354  | -0.37534 | 5.087768 |
| H | -4.03823 | 2.23684  | 6.041023 |
| H | 9.065483 | -5.50608 | -4.87273 |
| H | 7.85823  | 1.068809 | -5.81395 |
| H | 2.088247 | 5.532678 | -6.11498 |
| H | 5.453601 | 5.601026 | -4.25998 |
| H | -0.28207 | 8.202462 | 4.239843 |
| H | -5.70627 | 0.179217 | -5.03831 |
| H | -7.55553 | -4.81016 | -4.54939 |
| H | -10.6106 | 1.138184 | -2.78624 |
| H | 7.396653 | -3.53278 | 1.696821 |
| H | 5.941968 | -3.2035  | 1.232114 |
| C | 2.530477 | -4.9498  | -3.00225 |
| O | 2.607847 | -4.5468  | -1.80558 |
| O | 2.858314 | -4.20528 | -3.98472 |
| C | 2.086224 | -6.37926 | -3.27244 |
| H | 2.957192 | -7.03688 | -3.16239 |
| H | 1.703023 | -6.49387 | -4.28981 |
| H | 1.337271 | -6.69622 | -2.54135 |
| H | 0.321595 | 1.816318 | -3.62657 |
| H | -1.07677 | 0.90063  | -3.10112 |
| H | 0.416923 | 0.690258 | -2.32594 |
| O | 1.146619 | 0.230474 | -0.95929 |
| H | 1.431195 | -0.65892 | -1.32146 |
| H | 0.544045 | 0.058236 | -0.19057 |
| O | -3.14939 | -0.14105 | 0.150048 |
| H | -3.03296 | 0.152614 | -0.7762  |
| H | -2.26183 | -0.00919 | 0.576961 |
| O | -0.61518 | -0.07713 | 1.15887  |
| H | -0.4935  | -0.78673 | 1.822499 |
| H | -0.24791 | 0.751483 | 1.614401 |

<sup>5</sup>Pr<sub>B,C5</sub>

|   |          |          |          |
|---|----------|----------|----------|
| C | -3.57265 | 0.846268 | 6.057841 |
| H | -2.99065 | 0.907598 | 5.129963 |
| C | -2.64325 | 0.509198 | 7.228785 |
| H | -3.14276 | 0.732706 | 8.178236 |
| H | -2.44276 | -0.56441 | 7.23399  |
| C | -1.31122 | 1.266965 | 7.168312 |
| H | -1.47499 | 2.352735 | 7.140945 |
| H | -0.73417 | 1.068147 | 8.082122 |
| C | -0.43679 | 0.858941 | 5.977381 |
| O | -0.63948 | -0.20195 | 5.365085 |
| N | 0.569355 | 1.690917 | 5.657347 |
| H | 0.680753 | 2.574218 | 6.133373 |
| H | 1.139153 | 1.502849 | 4.819465 |
| C | -4.68006 | -0.1851  | 5.822144 |
| O | -4.79943 | -1.21424 | 6.501717 |
| N | -5.50261 | 0.10604  | 4.787387 |
| H | -5.30475 | 0.928132 | 4.222518 |
| C | -6.50955 | -0.82051 | 4.270627 |
| H | -7.0934  | -0.25969 | 3.534817 |
| C | -5.92675 | -2.09538 | 3.627541 |
| H | -5.59892 | -2.7721  | 4.423864 |
| H | -6.74764 | -2.60318 | 3.102054 |
| C | -4.74784 | -1.83768 | 2.680438 |
| H | -3.95862 | -1.31655 | 3.234465 |
| H | -5.03005 | -1.1748  | 1.854642 |
| C | -4.12462 | -3.11777 | 2.108569 |
| H | -3.11822 | -2.9116  | 1.740259 |
| H | -4.02808 | -3.87367 | 2.897643 |
| N | -4.87911 | -3.71536 | 1.002343 |
| H | -5.70745 | -4.27663 | 1.211717 |
| C | -4.41541 | -3.80763 | -0.25674 |
| N | -3.38836 | -3.07564 | -0.68697 |
| H | -3.22317 | -2.11138 | -0.33423 |
| H | -2.97787 | -3.34744 | -1.58936 |
| N | -4.99171 | -4.68828 | -1.10105 |
| H | -5.69021 | -5.3267  | -0.74232 |
| H | -4.86042 | -4.55764 | -2.10632 |
| C | -1.82616 | -6.46616 | 4.221988 |
| H | -0.87036 | -6.81691 | 4.631661 |
| H | -1.70456 | -6.38004 | 3.134703 |
| C | -2.2341  | -5.16033 | 4.830754 |
| N | -1.46888 | -4.01478 | 4.688773 |
| C | -2.10946 | -3.06702 | 5.359954 |
| H | -1.78648 | -2.03799 | 5.460876 |
| N | -3.24359 | -3.53849 | 5.927627 |

|   |          |          |          |
|---|----------|----------|----------|
| H | -3.92871 | -2.93566 | 6.385538 |
| C | -3.34306 | -4.87371 | 5.594725 |
| H | -4.16092 | -5.49256 | 5.932206 |
| C | 6.646772 | 1.862324 | -6.37656 |
| C | 6.632004 | 2.755416 | -5.13573 |
| C | 5.344476 | 1.086407 | -6.68789 |
| O | 7.458038 | 2.593565 | -4.23209 |
| C | 4.851642 | 0.228929 | -5.55863 |
| C | 5.254747 | -0.98024 | -5.04288 |
| N | 3.798217 | 0.637735 | -4.76352 |
| C | 3.595404 | -0.29864 | -3.82392 |
| N | 4.462418 | -1.30387 | -3.95651 |
| H | 6.898366 | 2.482114 | -7.24723 |
| H | 4.545293 | 1.780332 | -6.97099 |
| H | 5.53614  | 0.462384 | -7.56904 |
| H | 6.060515 | -1.62513 | -5.36284 |
| H | 2.834012 | -0.24171 | -3.06083 |
| H | 3.301677 | 1.57165  | -4.88548 |
| N | 5.727265 | 3.777486 | -5.11459 |
| H | 4.833399 | 3.675546 | -5.59768 |
| C | 5.729026 | 4.731169 | -4.00974 |
| H | 6.766591 | 4.869454 | -3.69292 |
| C | 4.870133 | 4.289836 | -2.81724 |
| O | 3.895994 | 4.957703 | -2.45311 |
| N | 5.245307 | 3.126    | -2.24064 |
| C | 4.368966 | 2.36932  | -1.34745 |
| C | 3.89937  | 3.238049 | -0.16144 |
| C | 5.12221  | 1.128526 | -0.83808 |
| O | 4.680969 | 3.649984 | 0.688168 |
| C | 4.247739 | 0.196162 | 0.023126 |
| C | 4.823736 | -1.21011 | 0.170305 |
| O | 4.943202 | -1.72826 | 1.308681 |
| O | 5.164551 | -1.82651 | -0.90405 |
| H | 6.078534 | 2.673867 | -2.61137 |
| H | 3.490081 | 2.048549 | -1.92288 |
| H | 5.493362 | 0.571187 | -1.70493 |
| H | 5.98747  | 1.471408 | -0.25941 |
| H | 3.260062 | 0.070449 | -0.44222 |
| H | 4.095281 | 0.619852 | 1.018906 |
| N | 2.553776 | 3.441842 | -0.12458 |
| H | 2.005089 | 3.152908 | -0.92341 |
| C | 1.85485  | 4.10585  | 0.9693   |
| H | 0.791444 | 4.0265   | 0.71847  |
| C | 2.047975 | 3.380182 | 2.30492  |
| H | 3.108603 | 3.315868 | 2.556563 |
| H | 1.567376 | 3.970139 | 3.093412 |
| C | 1.435475 | 1.976635 | 2.283046 |

|   |          |          |          |
|---|----------|----------|----------|
| O | 0.562034 | 1.732711 | 1.416711 |
| O | 1.858883 | 1.158906 | 3.17269  |
| C | 2.137972 | 5.613117 | 1.085113 |
| O | 1.798698 | 6.232347 | 2.100967 |
| N | 2.640934 | 6.2335   | -0.01203 |
| H | 3.005516 | 5.673019 | -0.7824  |
| C | 2.968033 | 7.657937 | 0.027335 |
| H | 3.429619 | 7.872893 | 0.997949 |
| C | 3.949519 | 8.024432 | -1.08965 |
| H | 4.893759 | 7.487366 | -0.95912 |
| H | 4.137889 | 9.099981 | -1.05512 |
| H | 3.545225 | 7.765123 | -2.07377 |
| C | 1.737361 | 8.592013 | -0.00916 |
| O | 1.878362 | 9.796424 | 0.1721   |
| N | 0.532256 | 7.993671 | -0.22856 |
| H | 0.521969 | 6.996651 | -0.39731 |
| C | -0.73627 | 8.690328 | -0.12361 |
| H | -0.49734 | 9.758163 | -0.17452 |
| C | -1.68406 | 8.341781 | -1.29702 |
| H | -1.21876 | 8.708793 | -2.21908 |
| H | -2.60571 | 8.906414 | -1.13465 |
| C | -1.99202 | 6.862883 | -1.42832 |
| C | -1.15353 | 6.016671 | -2.17046 |
| H | -0.29343 | 6.437384 | -2.68744 |
| C | -1.40898 | 4.64567  | -2.27018 |
| H | -0.72518 | 4.01915  | -2.83808 |
| C | -2.52827 | 4.099479 | -1.63728 |
| H | -2.74264 | 3.037091 | -1.72435 |
| C | -3.37662 | 4.931361 | -0.90107 |
| H | -4.25188 | 4.512875 | -0.40965 |
| C | -3.10833 | 6.297811 | -0.79153 |
| H | -3.76141 | 6.939775 | -0.2071  |
| C | -1.45193 | 8.488934 | 1.236961 |
| O | -2.61427 | 8.878055 | 1.377166 |
| N | -0.71636 | 7.922123 | 2.221783 |
| H | 0.221396 | 7.582149 | 2.024266 |
| C | -1.21246 | 7.750723 | 3.579426 |
| H | -2.17272 | 8.267505 | 3.632729 |
| C | -1.33219 | 6.275815 | 3.994951 |
| H | -0.33687 | 5.81955  | 3.910133 |
| H | -1.60269 | 6.247139 | 5.062507 |
| C | -2.33824 | 5.42887  | 3.193526 |
| H | -2.06347 | 5.49401  | 2.132195 |
| C | -2.24153 | 3.953454 | 3.60959  |
| H | -2.94559 | 3.334029 | 3.043048 |
| H | -1.23767 | 3.549199 | 3.436759 |
| H | -2.47224 | 3.833579 | 4.679084 |

|   |          |          |          |
|---|----------|----------|----------|
| C | -3.77918 | 5.945977 | 3.329178 |
| H | -4.46933 | 5.305681 | 2.762885 |
| H | -4.10168 | 5.949685 | 4.381047 |
| H | -3.88555 | 6.961394 | 2.934659 |
| C | -6.04704 | -0.29948 | -4.27111 |
| H | -5.60094 | -0.54423 | -5.2423  |
| C | -4.98261 | -0.50173 | -3.17652 |
| H | -5.24272 | 0.053057 | -2.27243 |
| H | -4.90881 | -1.56022 | -2.89848 |
| C | -3.56832 | -0.08891 | -3.61122 |
| O | -3.19951 | -0.36188 | -4.79916 |
| O | -2.84112 | 0.461031 | -2.74189 |
| C | -7.30607 | -1.13306 | -4.08803 |
| O | -8.42685 | -0.63434 | -3.95161 |
| N | -7.12548 | -2.49174 | -4.09592 |
| H | -6.18509 | -2.89096 | -4.11631 |
| C | -8.25436 | -3.40113 | -4.15978 |
| H | -8.99235 | -3.02766 | -4.87863 |
| C | -9.03189 | -3.64091 | -2.86238 |
| O | -9.96367 | -4.44745 | -2.84031 |
| N | -8.64912 | -2.91095 | -1.78535 |
| H | -7.8339  | -2.3203  | -1.8805  |
| C | -9.41994 | -2.86176 | -0.55313 |
| H | -10.3509 | -3.39731 | -0.76843 |
| C | -8.68519 | -3.53932 | 0.610561 |
| H | -9.32957 | -3.49887 | 1.495623 |
| H | -7.77957 | -2.97766 | 0.858372 |
| C | -8.26194 | -4.9827  | 0.367218 |
| O | -7.21184 | -5.42775 | 0.858822 |
| N | -9.09208 | -5.77867 | -0.34713 |
| H | -9.74182 | -5.40025 | -1.03479 |
| H | -8.75832 | -6.71981 | -0.51583 |
| C | -9.85931 | -1.42951 | -0.15669 |
| O | -10.2408 | -1.21819 | 0.989925 |
| N | -9.83529 | -0.50601 | -1.15047 |
| H | -9.53292 | -0.77123 | -2.08401 |
| C | -10.3578 | 0.845361 | -0.98231 |
| H | -10.7451 | 0.911465 | 0.036669 |
| C | -9.30562 | 1.943336 | -1.24973 |
| H | -8.82073 | 1.729144 | -2.21046 |
| H | -9.84866 | 2.88843  | -1.3783  |
| C | -8.2702  | 2.105197 | -0.15763 |
| C | -7.05002 | 1.416674 | -0.19184 |
| H | -6.83821 | 0.764118 | -1.03424 |
| C | -6.08941 | 1.562066 | 0.809988 |
| H | -5.1303  | 1.052708 | 0.751697 |
| C | -6.36073 | 2.410619 | 1.885795 |

|   |          |          |          |
|---|----------|----------|----------|
| O | -5.40568 | 2.511926 | 2.882337 |
| H | -5.54723 | 3.33275  | 3.381618 |
| C | -7.5678  | 3.110293 | 1.948915 |
| H | -7.77367 | 3.77212  | 2.787797 |
| C | -8.50625 | 2.957054 | 0.929059 |
| H | -9.43825 | 3.515247 | 0.9823   |
| C | 1.600295 | 5.042146 | -4.94019 |
| H | 2.101508 | 5.644376 | -4.17367 |
| H | 0.5239   | 5.21974  | -4.86617 |
| C | 1.927606 | 3.579975 | -4.66353 |
| O | 2.880143 | 3.060798 | -5.33208 |
| O | 1.268144 | 2.982527 | -3.7669  |
| C | 9.094524 | -5.7351  | -4.60111 |
| C | 8.109631 | -5.02039 | -3.73576 |
| C | 6.897025 | -4.43961 | -4.00194 |
| N | 8.30102  | -4.81095 | -2.3779  |
| C | 7.238766 | -4.13339 | -1.87732 |
| N | 6.365859 | -3.89258 | -2.84629 |
| H | 9.267136 | -6.76447 | -4.26205 |
| H | 8.721317 | -5.78264 | -5.62769 |
| H | 6.375077 | -4.38161 | -4.94654 |
| H | 7.143127 | -3.8528  | -0.83019 |
| H | 9.103109 | -5.10442 | -1.83784 |
| C | 5.67145  | -6.86014 | 3.252457 |
| H | 6.366351 | -7.4424  | 2.630443 |
| C | 4.784204 | -6.00345 | 2.335137 |
| H | 5.404431 | -5.32466 | 1.73942  |
| H | 4.295274 | -6.67804 | 1.617661 |
| C | 3.70559  | -5.2036  | 3.078435 |
| H | 3.053053 | -5.88958 | 3.637548 |
| H | 4.166062 | -4.5355  | 3.816576 |
| C | 2.861408 | -4.37125 | 2.104265 |
| H | 3.479666 | -3.61006 | 1.623089 |
| H | 2.473357 | -5.01122 | 1.300985 |
| N | 1.716418 | -3.72164 | 2.741414 |
| H | 0.961854 | -4.31956 | 3.056244 |
| C | 1.53096  | -2.40593 | 2.962898 |
| N | 2.457719 | -1.48554 | 2.760732 |
| H | 3.381153 | -1.68494 | 2.368068 |
| H | 2.191775 | -0.48336 | 2.871705 |
| N | 0.289101 | -2.02281 | 3.367864 |
| H | -0.30976 | -2.78146 | 3.719656 |
| H | 0.210688 | -1.16484 | 3.92737  |
| C | 6.51481  | -6.14022 | 4.307216 |
| O | 6.666934 | -6.61363 | 5.432007 |
| N | 7.130772 | -4.98015 | 3.933856 |
| H | 7.060238 | -4.60913 | 2.984597 |

|    |          |          |          |
|----|----------|----------|----------|
| C  | 8.035079 | -4.3555  | 4.876747 |
| H  | 7.540699 | -4.27631 | 5.851587 |
| C  | 8.52965  | -2.99355 | 4.397145 |
| O  | 8.693016 | -2.71167 | 3.206445 |
| N  | 8.851561 | -2.12776 | 5.389053 |
| H  | 8.639357 | -2.38583 | 6.341995 |
| C  | 9.377779 | -0.7876  | 5.121405 |
| H  | 10.06897 | -0.87169 | 4.278529 |
| C  | 8.284829 | 0.242189 | 4.7908   |
| H  | 8.766743 | 1.181807 | 4.495401 |
| H  | 7.733832 | -0.11836 | 3.916034 |
| C  | 7.325778 | 0.508076 | 5.955728 |
| H  | 6.918701 | -0.43102 | 6.351629 |
| H  | 7.852261 | 1.005819 | 6.779164 |
| S  | 5.918962 | 1.610212 | 5.53983  |
| C  | 4.902564 | 0.468783 | 4.538256 |
| H  | 4.01121  | 1.014376 | 4.216106 |
| H  | 5.433636 | 0.12042  | 3.647538 |
| H  | 4.5873   | -0.39356 | 5.135642 |
| O  | 0.794334 | -2.12    | -3.72655 |
| O  | 6.99914  | -3.65265 | 1.226836 |
| Fe | 4.561961 | -2.79827 | -2.49233 |
| C  | -1.2072  | -3.66327 | -5.81762 |
| H  | -1.02026 | -4.10522 | -6.80576 |
| H  | -0.73083 | -4.32736 | -5.08968 |
| C  | -2.7201  | -3.74812 | -5.55965 |
| H  | -3.10023 | -4.64833 | -6.05685 |
| C  | -3.22235 | -3.83882 | -4.08684 |
| O  | -2.37651 | -3.96602 | -3.18959 |
| O  | -4.49403 | -3.79409 | -3.9755  |
| N  | -3.51668 | -2.60284 | -6.15534 |
| H  | -3.37866 | -1.66829 | -5.60612 |
| H  | -4.50224 | -2.85039 | -6.01963 |
| H  | -3.32803 | -2.45512 | -7.14981 |
| C  | -0.52463 | -2.28157 | -5.80307 |
| H  | -1.07409 | -1.59381 | -6.46068 |
| H  | 0.468469 | -2.39925 | -6.25404 |
| C  | -0.32649 | -1.60588 | -4.43372 |
| H  | 0.907135 | -3.10535 | -3.81416 |
| H  | -1.234   | -1.72495 | -3.83189 |
| C  | -0.06581 | -0.11279 | -4.64748 |
| H  | 0.922018 | 0.032284 | -5.09134 |
| H  | -0.83094 | 0.314725 | -5.29527 |
| N  | -0.11782 | 0.65845  | -3.37026 |
| H  | 8.920951 | -4.98967 | 5.044168 |
| H  | 9.954057 | -0.48075 | 6.001659 |
| H  | -2.57573 | -7.24011 | 4.414506 |



|   |          |          |          |
|---|----------|----------|----------|
| H | 5.069495 | -7.58602 | 3.808409 |
| H | -7.18486 | -1.10247 | 5.085423 |
| H | -4.02888 | 1.835947 | 6.196385 |
| H | 10.06571 | -5.22461 | -4.62382 |
| H | 7.467744 | 1.158251 | -6.21939 |
| H | 1.965513 | 5.350325 | -5.9234  |
| H | 5.327481 | 5.683753 | -4.35979 |
| H | -0.5248  | 8.258058 | 4.269155 |
| H | -6.35972 | 0.746579 | -4.3161  |
| H | -7.90426 | -4.37295 | -4.51775 |
| H | -11.1974 | 0.981495 | -1.67649 |
| H | 7.716404 | -3.19979 | 1.717875 |
| H | 6.244991 | -3.01381 | 1.246809 |
| C | 2.484494 | -4.94255 | -3.2911  |
| O | 1.451376 | -4.7137  | -3.93767 |
| O | 3.112983 | -4.05873 | -2.57934 |
| C | 3.072014 | -6.34684 | -3.26725 |
| H | 3.089016 | -6.71883 | -2.23676 |
| H | 4.110427 | -6.32344 | -3.61649 |
| H | 2.484747 | -7.02306 | -3.89124 |
| H | 0.332568 | 1.595148 | -3.51265 |
| H | -1.12201 | 0.742757 | -3.08743 |
| H | 0.40385  | 0.177997 | -2.59505 |
| O | 1.269666 | -0.78584 | -1.41032 |
| H | 1.086383 | -1.55949 | -1.98933 |
| H | 0.688523 | -0.84712 | -0.60869 |
| O | -3.06305 | -0.39866 | -0.02127 |
| H | -3.02274 | -0.00055 | -0.91935 |
| H | -2.13496 | -0.35034 | 0.322782 |
| O | -0.42318 | -0.59072 | 0.764806 |
| H | -0.34106 | -1.17639 | 1.543934 |
| H | -0.0582  | 0.299988 | 1.085635 |

**Model 3 structures:**

<sup>1</sup>Re<sub>C</sub>

|   |          |          |          |
|---|----------|----------|----------|
| C | -0.65538 | -6.41822 | -2.89492 |
| H | -0.38917 | -5.98349 | -1.91942 |
| C | -0.62783 | -5.37169 | -4.00559 |
| H | -0.86387 | -5.87026 | -4.9582  |
| H | -1.42247 | -4.63488 | -3.83961 |
| C | 0.69163  | -4.62009 | -4.14219 |
| H | 0.971848 | -4.15042 | -3.18521 |
| H | 1.522863 | -5.29104 | -4.40547 |
| C | 0.583267 | -3.48951 | -5.15815 |
| O | -0.45461 | -2.82401 | -5.26241 |
| N | 1.671563 | -3.24796 | -5.90761 |
| H | 2.600378 | -3.64356 | -5.71106 |
| H | 1.618525 | -2.48145 | -6.57012 |
| C | -1.99873 | -7.1343  | -2.80281 |
| O | -2.64409 | -7.42196 | -3.81704 |
| N | -2.40282 | -7.47237 | -1.56277 |
| H | -1.95314 | -7.07555 | -0.73189 |
| C | -3.55655 | -8.32146 | -1.30325 |
| H | -3.43969 | -8.69006 | -0.27318 |
| C | -4.92237 | -7.64349 | -1.4546  |
| H | -5.09509 | -7.44329 | -2.52449 |
| H | -5.68928 | -8.37829 | -1.15345 |
| C | -5.08046 | -6.36031 | -0.64055 |
| H | -4.3668  | -5.59685 | -0.98939 |
| H | -4.82796 | -6.53904 | 0.417405 |
| C | -6.494   | -5.78891 | -0.73973 |
| H | -6.78837 | -5.6961  | -1.80364 |
| H | -7.21038 | -6.48978 | -0.27212 |
| N | -6.56033 | -4.4915  | -0.08706 |
| H | -5.66348 | -4.00251 | 0.086414 |
| C | -7.63443 | -3.70853 | -0.04718 |
| N | -8.83126 | -4.13477 | -0.54676 |
| H | -8.99553 | -5.13258 | -0.6073  |
| H | -9.63018 | -3.54903 | -0.30119 |
| N | -7.5369  | -2.47758 | 0.438544 |
| H | -6.68022 | -2.26594 | 0.987444 |
| H | -8.3789  | -1.89579 | 0.474534 |
| C | -7.46048 | -2.89753 | -4.48128 |
| H | -7.82315 | -3.93691 | -4.46266 |
| C | -6.16496 | -2.78374 | -3.64697 |
| H | -5.88171 | -1.72616 | -3.56652 |
| H | -6.31999 | -3.14207 | -2.61898 |
| C | -5.06052 | -3.55862 | -4.28587 |
| N | -4.37166 | -3.08382 | -5.38828 |

|   |          |          |          |
|---|----------|----------|----------|
| C | -3.56777 | -4.06812 | -5.77412 |
| H | -2.84944 | -4.02325 | -6.59043 |
| N | -3.71556 | -5.15374 | -4.97918 |
| H | -3.18662 | -6.0362  | -4.95768 |
| C | -4.65161 | -4.84651 | -4.02279 |
| H | -4.93395 | -5.55507 | -3.25565 |
| C | -8.52795 | -1.93293 | -4.01614 |
| O | -8.50557 | -0.73955 | -4.32297 |
| N | -9.48867 | -2.45677 | -3.21256 |
| H | -9.34963 | -3.39009 | -2.83811 |
| C | -10.525  | -1.63275 | -2.5948  |
| H | -10.8037 | -0.87534 | -3.34194 |
| C | -11.7444 | -2.46247 | -2.22824 |
| H | -12.5178 | -1.8282  | -1.7733  |
| H | -11.4971 | -3.24752 | -1.49848 |
| H | -12.1618 | -2.938   | -3.1272  |
| C | -9.90201 | -0.91083 | -1.38203 |
| O | -9.97349 | -1.38646 | -0.24143 |
| N | -9.23791 | 0.204589 | -1.71767 |
| H | -9.15951 | 0.368475 | -2.7229  |
| C | -8.43293 | 1.061244 | -0.85979 |
| H | -8.28351 | 0.575837 | 0.114973 |
| C | -7.08531 | 1.380992 | -1.53264 |
| H | -7.30304 | 1.526273 | -2.60744 |
| C | -6.48148 | 2.681835 | -1.00201 |
| H | -7.15642 | 3.539037 | -1.16317 |
| H | -6.26597 | 2.579793 | 0.072422 |
| H | -5.52922 | 2.890448 | -1.50998 |
| C | -6.10003 | 0.217153 | -1.39473 |
| H | -6.55747 | -0.74058 | -1.67367 |
| H | -5.75318 | 0.135116 | -0.35429 |
| H | -5.22052 | 0.370743 | -2.0399  |
| C | -2.45346 | 1.472741 | 5.955864 |
| H | -1.51947 | 2.052225 | 6.017303 |
| C | -2.10791 | -0.0166  | 5.944292 |
| H | -1.35791 | -0.1848  | 5.148941 |
| C | -1.49342 | -0.45259 | 7.2703   |
| H | -1.27186 | -1.532   | 7.262293 |
| H | -2.19781 | -0.27025 | 8.096208 |
| H | -0.55793 | 0.092576 | 7.469508 |
| O | -3.29041 | -0.74202 | 5.652715 |
| H | -3.03905 | -1.64636 | 5.335959 |
| C | -3.21744 | 1.913126 | 4.735394 |
| O | -4.18179 | 2.698211 | 4.831403 |
| N | -2.85966 | 1.415593 | 3.539663 |
| H | -2.10784 | 0.727795 | 3.436421 |
| C | -3.73207 | 1.535192 | 2.394087 |

|   |          |          |          |
|---|----------|----------|----------|
| H | -3.9147  | 2.583091 | 2.122218 |
| H | -3.23844 | 1.054446 | 1.539568 |
| C | -5.08593 | 0.831753 | 2.580729 |
| O | -6.04886 | 1.155739 | 1.878167 |
| N | -5.10136 | -0.12877 | 3.514154 |
| H | -4.28354 | -0.27754 | 4.117377 |
| C | -6.21844 | -1.01263 | 3.770647 |
| H | -7.05975 | -0.68809 | 3.142187 |
| C | -5.82385 | -2.45445 | 3.450915 |
| H | -5.00581 | -2.78683 | 4.110385 |
| H | -6.6886  | -3.1149  | 3.628994 |
| O | -5.44853 | -2.60318 | 2.100088 |
| H | -4.59157 | -2.16539 | 1.87292  |
| C | -1.28631 | 8.229368 | 4.67007  |
| H | -0.60172 | 7.884627 | 5.45906  |
| C | -2.11957 | 7.065681 | 4.130133 |
| H | -2.94718 | 7.466749 | 3.524325 |
| H | -2.58671 | 6.550915 | 4.988562 |
| C | -1.35016 | 6.036364 | 3.285556 |
| H | -1.08337 | 6.526909 | 2.332389 |
| C | -0.04335 | 5.573122 | 3.937462 |
| H | 0.682868 | 6.393301 | 4.026282 |
| H | 0.416964 | 4.788524 | 3.323319 |
| H | -0.22697 | 5.145579 | 4.938526 |
| C | -2.26414 | 4.850659 | 2.979318 |
| H | -1.77553 | 4.128996 | 2.312142 |
| H | -3.20447 | 5.180724 | 2.51314  |
| H | -2.53341 | 4.32624  | 3.906785 |
| C | -0.51314 | 8.952967 | 3.58514  |
| O | -1.02462 | 9.305642 | 2.521252 |
| N | 0.782289 | 9.221758 | 3.869689 |
| H | 1.184306 | 8.847892 | 4.71922  |
| C | 1.631477 | 9.922316 | 2.947368 |
| H | 1.151456 | 10.86543 | 2.640534 |
| C | 1.967681 | 9.119808 | 1.683484 |
| O | 1.74817  | 7.915651 | 1.580859 |
| N | 2.520749 | 9.871931 | 0.713099 |
| H | 2.764147 | 10.83189 | 0.924393 |
| C | 2.993148 | 9.29387  | -0.52394 |
| H | 2.158282 | 8.852382 | -1.08161 |
| C | 4.069707 | 8.233019 | -0.2777  |
| O | 4.892448 | 8.336246 | 0.616808 |
| N | 4.026244 | 7.200829 | -1.15531 |
| C | 4.997321 | 6.136146 | -1.09268 |
| C | 5.023173 | 5.434055 | -2.4454  |
| C | 4.717744 | 5.128881 | 0.071618 |
| O | 4.029681 | 5.398494 | -3.1767  |

|   |          |          |          |
|---|----------|----------|----------|
| C | 3.336505 | 4.567041 | 0.058915 |
| C | 2.828152 | 3.346755 | -0.34139 |
| N | 2.231312 | 5.323894 | 0.415325 |
| C | 1.123133 | 4.597034 | 0.214506 |
| N | 1.444742 | 3.389908 | -0.24762 |
| H | 3.217783 | 7.077743 | -1.76857 |
| H | 5.984289 | 6.574635 | -0.88358 |
| H | 5.466225 | 4.326022 | 0.042009 |
| H | 4.885795 | 5.694686 | 1.000278 |
| H | 3.365306 | 2.465172 | -0.67945 |
| H | 0.112759 | 4.939672 | 0.396171 |
| H | 2.215037 | 6.298538 | 0.750655 |
| N | 6.186179 | 4.829904 | -2.76273 |
| H | 6.900752 | 4.690078 | -2.03212 |
| C | 6.201238 | 3.874552 | -3.84779 |
| H | 5.703503 | 4.298693 | -4.72963 |
| C | 5.521911 | 2.587888 | -3.38895 |
| O | 5.774101 | 2.102867 | -2.27864 |
| N | 4.61124  | 2.024121 | -4.19835 |
| C | 3.943125 | 0.808743 | -3.75881 |
| C | 4.962053 | -0.34835 | -3.74788 |
| C | 2.74275  | 0.468749 | -4.64092 |
| O | 5.638189 | -0.58476 | -4.73685 |
| C | 1.719241 | -0.41344 | -3.90524 |
| C | 0.813682 | 0.39001  | -2.99521 |
| O | -0.40735 | 0.467182 | -3.26727 |
| O | 1.319366 | 0.994045 | -1.98765 |
| H | 4.507109 | 2.347838 | -5.15304 |
| H | 3.604625 | 0.997976 | -2.73532 |
| H | 2.25303  | 1.398261 | -4.97692 |
| H | 3.099257 | -0.05632 | -5.54091 |
| H | 2.243523 | -1.18752 | -3.32222 |
| H | 1.0765   | -0.93364 | -4.62257 |
| N | 5.014131 | -1.02226 | -2.57829 |
| H | 4.457029 | -0.68066 | -1.78046 |
| C | 5.92515  | -2.11513 | -2.313   |
| H | 5.603605 | -2.55725 | -1.35832 |
| C | 5.914047 | -3.21449 | -3.40157 |
| H | 6.564193 | -2.94618 | -4.24013 |
| H | 6.302849 | -4.14528 | -2.95882 |
| C | 4.550504 | -3.49787 | -4.0054  |
| O | 3.487943 | -3.51991 | -3.19689 |
| O | 4.39623  | -3.7034  | -5.19101 |
| C | 7.372623 | -1.65015 | -2.08077 |
| O | 8.259648 | -2.47051 | -1.84289 |
| N | 7.602547 | -0.32454 | -2.16631 |
| H | 6.82179  | 0.325996 | -2.22603 |

|   |          |          |          |
|---|----------|----------|----------|
| C | 8.955707 | 0.212767 | -2.23777 |
| H | 9.580931 | -0.60691 | -2.62456 |
| C | 9.029819 | 1.40436  | -3.17991 |
| H | 10.07648 | 1.699467 | -3.33566 |
| H | 8.506829 | 2.269629 | -2.75565 |
| H | 8.58355  | 1.137537 | -4.14916 |
| C | 9.490642 | 0.543223 | -0.82842 |
| O | 9.728252 | 1.691763 | -0.4586  |
| N | 9.67891  | -0.55546 | -0.06968 |
| H | 9.299415 | -1.42717 | -0.44725 |
| C | 10.18187 | -0.53176 | 1.298865 |
| H | 11.17634 | -0.04952 | 1.28178  |
| C | 9.312009 | 0.281108 | 2.277237 |
| H | 9.468747 | 1.342402 | 2.049101 |
| H | 9.712862 | 0.080245 | 3.280602 |
| C | 7.83236  | -0.02298 | 2.242748 |
| C | 6.943192 | 0.882171 | 1.641169 |
| H | 7.334548 | 1.783842 | 1.164925 |
| C | 5.563213 | 0.664229 | 1.685516 |
| H | 4.883425 | 1.404944 | 1.256929 |
| C | 5.05622  | -0.47872 | 2.310351 |
| H | 3.97976  | -0.62041 | 2.393936 |
| C | 5.931396 | -1.41426 | 2.870526 |
| H | 5.53367  | -2.3138  | 3.346279 |
| C | 7.308396 | -1.18042 | 2.844119 |
| H | 7.992213 | -1.88491 | 3.317522 |
| C | 10.40171 | -1.97515 | 1.802622 |
| O | 10.26832 | -2.25555 | 2.983173 |
| N | 10.75341 | -2.88462 | 0.856246 |
| H | 10.86208 | -2.57526 | -0.10187 |
| C | 10.70923 | -4.32052 | 1.093805 |
| H | 10.77164 | -4.46548 | 2.179992 |
| C | 9.440288 | -4.95355 | 0.509163 |
| H | 9.431841 | -4.77049 | -0.57948 |
| H | 9.503779 | -6.04854 | 0.643332 |
| C | 8.118849 | -4.43908 | 1.102394 |
| H | 8.126078 | -3.33722 | 1.034646 |
| C | 6.932679 | -4.91662 | 0.262451 |
| H | 7.065262 | -4.6295  | -0.79175 |
| H | 6.819744 | -6.01362 | 0.311296 |
| H | 6.000122 | -4.46456 | 0.627589 |
| C | 7.940984 | -4.81859 | 2.575969 |
| H | 8.720059 | -4.36683 | 3.207271 |
| H | 6.962908 | -4.48274 | 2.95537  |
| H | 7.985664 | -5.9144  | 2.703115 |
| C | 3.113285 | -5.94548 | 5.901788 |
| H | 3.35628  | -6.12387 | 6.961604 |

|   |          |          |          |
|---|----------|----------|----------|
| C | 2.844602 | -4.44112 | 5.676476 |
| H | 1.846302 | -4.1593  | 6.045039 |
| H | 3.587763 | -3.87235 | 6.25551  |
| C | 3.032211 | -4.02896 | 4.209083 |
| O | 4.156861 | -4.15702 | 3.715739 |
| O | 2.003691 | -3.57606 | 3.584659 |
| C | 1.929186 | -6.81237 | 5.517195 |
| O | 1.834656 | -7.40359 | 4.441823 |
| N | 0.914503 | -6.84667 | 6.430032 |
| H | 1.066289 | -6.40489 | 7.328827 |
| C | -0.24833 | -7.70032 | 6.271942 |
| H | 0.050475 | -8.7437  | 6.083508 |
| C | -1.19268 | -7.33519 | 5.12231  |
| O | -2.06997 | -8.09873 | 4.767606 |
| N | -0.94719 | -6.1444  | 4.509947 |
| H | -0.21137 | -5.54741 | 4.86847  |
| C | -1.62722 | -5.76536 | 3.294253 |
| H | -2.71444 | -5.87285 | 3.428742 |
| C | -1.27632 | -4.31881 | 2.929148 |
| H | -1.90385 | -4.01336 | 2.082395 |
| H | -0.22085 | -4.2932  | 2.637077 |
| C | -1.50279 | -3.34326 | 4.069338 |
| O | -2.64392 | -2.97793 | 4.380362 |
| N | -0.38677 | -2.95246 | 4.702803 |
| H | 0.566038 | -3.14646 | 4.31364  |
| H | -0.46245 | -2.23844 | 5.418237 |
| C | -1.27282 | -6.65705 | 2.086653 |
| O | -1.93179 | -6.5429  | 1.049937 |
| N | -0.22348 | -7.48643 | 2.228726 |
| H | 0.29156  | -7.49111 | 3.112079 |
| C | 0.104208 | -8.51925 | 1.264688 |
| H | -0.34175 | -8.24197 | 0.300109 |
| C | 1.623792 | -8.72365 | 1.121471 |
| H | 2.042369 | -9.01641 | 2.095986 |
| H | 1.782375 | -9.55978 | 0.421764 |
| C | 2.305752 | -7.48669 | 0.621941 |
| C | 2.269779 | -7.15363 | -0.76224 |
| H | 1.819383 | -7.86015 | -1.46383 |
| C | 2.778082 | -5.96374 | -1.22179 |
| H | 2.741529 | -5.69304 | -2.27675 |
| C | 3.345089 | -5.01127 | -0.28634 |
| O | 3.711277 | -3.84999 | -0.65203 |
| H | 3.686232 | -3.52669 | -2.21388 |
| C | 3.443484 | -5.39537 | 1.101468 |
| H | 3.910267 | -4.7165  | 1.822655 |
| C | 2.922269 | -6.59339 | 1.530188 |
| H | 2.955287 | -6.85439 | 2.589578 |

|   |          |          |          |
|---|----------|----------|----------|
| C | 0.219346 | 7.644421 | -4.19536 |
| C | 0.184699 | 7.592455 | -2.67422 |
| C | -0.3876  | 6.364323 | -4.81797 |
| O | 1.175994 | 7.26875  | -2.01604 |
| C | 0.075296 | 5.135574 | -4.11007 |
| C | -0.61244 | 4.246509 | -3.31555 |
| N | 1.405359 | 4.773324 | -3.98892 |
| C | 1.488327 | 3.72789  | -3.14601 |
| N | 0.282938 | 3.382933 | -2.71421 |
| H | -0.31306 | 8.530372 | -4.57471 |
| H | -0.13927 | 6.33319  | -5.8918  |
| H | -1.48548 | 6.3941   | -4.75215 |
| H | -1.68225 | 4.185989 | -3.14335 |
| H | 2.432032 | 3.291411 | -2.84457 |
| H | 2.239241 | 5.301598 | -4.24362 |
| N | -0.99534 | 7.881634 | -2.09652 |
| H | -1.84218 | 7.999602 | -2.65026 |
| C | -1.22306 | 7.803267 | -0.67148 |
| H | -0.6469  | 8.55755  | -0.11339 |
| H | -0.90546 | 6.821184 | -0.28068 |
| C | -2.72458 | 7.96419  | -0.43919 |
| O | -3.52037 | 7.72224  | -1.34571 |
| N | -3.09412 | 8.358602 | 0.79421  |
| H | -2.37972 | 8.671987 | 1.464296 |
| C | -4.49879 | 8.568365 | 1.100987 |
| H | -4.98476 | 9.018755 | 0.220981 |
| C | -5.23497 | 7.277854 | 1.474206 |
| H | -5.05048 | 6.529298 | 0.688949 |
| H | -4.79937 | 6.875389 | 2.403613 |
| C | -6.74086 | 7.478473 | 1.637821 |
| H | -7.19341 | 7.742552 | 0.667501 |
| H | -6.94541 | 8.334459 | 2.30752  |
| C | -7.46427 | 6.244312 | 2.183237 |
| H | -8.55512 | 6.388862 | 2.159844 |
| H | -7.24487 | 5.36869  | 1.556757 |
| N | -7.0667  | 5.943932 | 3.559567 |
| H | -7.26349 | 6.666684 | 4.243642 |
| C | -6.22181 | 4.973113 | 3.946717 |
| N | -5.96662 | 3.909785 | 3.19044  |
| H | -6.58626 | 3.579707 | 2.460132 |
| H | -5.29157 | 3.240057 | 3.597413 |
| N | -5.60289 | 5.06103  | 5.132753 |
| H | -5.58696 | 5.927816 | 5.652273 |
| H | -5.01315 | 4.274121 | 5.42687  |
| C | -5.62035 | 0.683707 | -5.1848  |
| H | -6.5476  | 0.100528 | -5.25532 |
| H | -5.57441 | 1.400703 | -6.02159 |



|    |          |          |          |
|----|----------|----------|----------|
| N  | -4.48165 | -0.2157  | -5.18349 |
| H  | -4.57794 | -1.20191 | -5.49622 |
| C  | -3.24545 | 0.136635 | -4.83029 |
| N  | -2.98806 | 1.348733 | -4.29424 |
| H  | -3.72612 | 1.872103 | -3.83989 |
| H  | -2.05626 | 1.503834 | -3.91573 |
| N  | -2.23107 | -0.70359 | -5.02438 |
| H  | -2.3688  | -1.64017 | -5.38806 |
| H  | -1.32752 | -0.48994 | -4.60177 |
| O  | -2.94427 | 2.451045 | -1.56408 |
| C  | -2.51395 | 3.366164 | -0.83666 |
| O  | -1.3     | 3.451103 | -0.4282  |
| C  | -3.40566 | 4.512794 | -0.41946 |
| H  | -4.35607 | 4.125912 | -0.03017 |
| H  | -2.91945 | 5.136004 | 0.335824 |
| O  | -0.27392 | 1.034762 | 0.239155 |
| O  | -1.23085 | -0.51168 | 2.22485  |
| Fe | 0.055782 | 2.219973 | -1.00924 |
| C  | -2.80562 | -1.52406 | -1.54309 |
| N  | -2.1953  | -0.19498 | -1.31165 |
| H  | -1.56733 | -0.06834 | -0.48427 |
| H  | -1.57602 | 0.067427 | -2.10653 |
| H  | -2.8663  | 0.588653 | -1.24204 |
| C  | -3.58493 | -2.02932 | -0.31599 |
| O  | -3.35367 | -1.47924 | 0.804559 |
| O  | -4.35487 | -2.97187 | -0.55351 |
| C  | -1.78978 | -2.57885 | -2.00424 |
| C  | -0.85022 | -3.12299 | -0.92531 |
| C  | 0.405536 | -2.30857 | -0.56988 |
| C  | 0.897229 | -2.81448 | 0.778525 |
| N  | 2.197644 | -2.30688 | 1.258803 |
| H  | 2.17739  | -1.27059 | 1.345839 |
| H  | 2.333206 | -2.75587 | 2.227313 |
| H  | 2.969717 | -2.56701 | 0.624443 |
| H  | -8.98654 | 1.998475 | -0.67363 |
| H  | 2.574909 | 10.17462 | 3.454893 |
| H  | 3.435622 | 10.09467 | -1.1341  |
| H  | 7.243551 | 3.639957 | -4.10701 |
| H  | 11.60281 | -4.78439 | 0.64672  |
| H  | -1.95015 | 8.977284 | 5.136595 |
| H  | -4.55866 | 9.295311 | 1.925881 |
| H  | 1.276548 | 7.743649 | -4.47875 |
| H  | -3.63177 | 5.142886 | -1.29344 |
| H  | 3.98147  | -6.24743 | 5.301143 |
| H  | -0.35375 | -9.47584 | 1.572225 |
| H  | -0.82734 | -7.69147 | 7.206109 |
| H  | -3.087   | 1.711195 | 6.82175  |

|   |          |          |          |
|---|----------|----------|----------|
| H | -6.52213 | -0.93308 | 4.828415 |
| H | 0.097735 | -7.20088 | -3.09717 |
| H | -3.51471 | -9.187   | -1.98198 |
| H | -7.23366 | -2.64844 | -5.528   |
| H | -0.87292 | 0.078353 | 1.509101 |
| H | -1.97996 | -0.98519 | 1.792102 |
| H | 0.162213 | -2.52913 | 1.539181 |
| H | 0.96338  | -3.91205 | 0.774109 |
| H | 0.206529 | -1.22853 | -0.49652 |
| H | 1.180195 | -2.43852 | -1.34343 |
| H | -1.43681 | -3.30375 | -0.01062 |
| H | -0.51588 | -4.12289 | -1.23636 |
| H | -1.23232 | -2.21614 | -2.88038 |
| H | -2.41219 | -3.40757 | -2.36873 |
| H | -3.53426 | -1.39161 | -2.3546  |
| H | -5.68625 | 1.250216 | -4.24229 |
| O | 1.965908 | 0.512822 | 1.572617 |
| H | 1.126081 | 0.662588 | 1.037924 |
| H | 1.675328 | 0.26498  | 2.491054 |
| O | 0.260503 | 2.6388   | 2.406157 |
| H | -0.208   | 2.17317  | 1.668661 |
| H | 1.183932 | 2.44022  | 2.173665 |
| O | 3.280517 | -0.2418  | -0.62653 |
| H | 2.519014 | 0.170317 | -1.08437 |
| H | 3.21567  | 0.118294 | 0.278187 |
| O | 0.98225  | -0.36907 | 3.897943 |
| H | 0.130016 | -0.58288 | 3.467118 |
| H | 0.807968 | 0.435516 | 4.436712 |
| O | 0.401347 | 2.086059 | 4.993221 |
| H | 0.232802 | 2.366155 | 4.054498 |
| H | 1.180792 | 2.587302 | 5.269133 |
| O | 7.63701  | 3.548223 | -0.7654  |
| H | 7.036241 | 2.859872 | -1.1096  |
| H | 8.484562 | 3.078468 | -0.61152 |

<sup>3</sup>Re<sub>C</sub>

|   |          |          |          |
|---|----------|----------|----------|
| C | -0.90281 | -6.39026 | -2.92536 |
| H | -0.61872 | -5.97504 | -1.94633 |
| C | -0.83179 | -5.33791 | -4.02891 |
| H | -1.09158 | -5.81971 | -4.98398 |
| H | -1.59416 | -4.56927 | -3.85605 |
| C | 0.517807 | -4.64127 | -4.1662  |
| H | 0.822347 | -4.19195 | -3.20683 |
| H | 1.318661 | -5.34435 | -4.43939 |
| C | 0.450807 | -3.49999 | -5.17418 |
| O | -0.55785 | -2.78885 | -5.26511 |
| N | 1.540464 | -3.30174 | -5.93431 |
| H | 2.456768 | -3.72878 | -5.74626 |
| H | 1.51309  | -2.52815 | -6.59021 |
| C | -2.27596 | -7.04874 | -2.83987 |
| O | -2.92877 | -7.3058  | -3.85775 |
| N | -2.70071 | -7.37198 | -1.60281 |
| H | -2.23819 | -6.99798 | -0.76796 |
| C | -3.88631 | -8.17946 | -1.35265 |
| H | -3.7843  | -8.56361 | -0.32659 |
| C | -5.22626 | -7.44988 | -1.49664 |
| H | -5.38944 | -7.22703 | -2.56366 |
| H | -6.02013 | -8.16091 | -1.20861 |
| C | -5.33922 | -6.17489 | -0.66262 |
| H | -4.59107 | -5.43671 | -0.99296 |
| H | -5.10265 | -6.38189 | 0.393887 |
| C | -6.72691 | -5.54232 | -0.76122 |
| H | -7.00833 | -5.41462 | -1.82484 |
| H | -7.47657 | -6.22079 | -0.31332 |
| N | -6.74123 | -4.25633 | -0.08262 |
| H | -5.82402 | -3.81394 | 0.103682 |
| C | -7.77204 | -3.41697 | -0.04901 |
| N | -8.9859  | -3.77623 | -0.55967 |
| H | -9.20396 | -4.76385 | -0.6191  |
| H | -9.75292 | -3.14762 | -0.31728 |
| N | -7.61179 | -2.1943  | 0.442099 |
| H | -6.74734 | -2.03119 | 0.993686 |
| H | -8.42219 | -1.56994 | 0.482126 |
| C | -7.54845 | -2.57284 | -4.47392 |
| H | -7.95316 | -3.59652 | -4.45358 |
| C | -6.24437 | -2.51283 | -3.64775 |
| H | -5.91591 | -1.46806 | -3.57175 |
| H | -6.40772 | -2.86176 | -2.61776 |
| C | -5.17769 | -3.33439 | -4.29253 |
| N | -4.47232 | -2.88802 | -5.39656 |
| C | -3.716   | -3.9073  | -5.7883  |

|   |          |          |          |
|---|----------|----------|----------|
| H | -2.99957 | -3.89325 | -6.60739 |
| N | -3.91022 | -4.98744 | -4.996   |
| H | -3.42167 | -5.8933  | -4.97947 |
| C | -4.82708 | -4.64043 | -4.03464 |
| H | -5.13854 | -5.33716 | -3.26785 |
| C | -8.57269 | -1.56534 | -4.00258 |
| O | -8.49386 | -0.37074 | -4.29532 |
| N | -9.56093 | -2.05324 | -3.21024 |
| H | -9.46828 | -2.99694 | -2.84759 |
| C | -10.5618 | -1.1888  | -2.58926 |
| H | -10.8057 | -0.41499 | -3.33177 |
| C | -11.8173 | -1.96679 | -2.23077 |
| H | -12.5652 | -1.30122 | -1.77788 |
| H | -11.6076 | -2.76365 | -1.50198 |
| H | -12.2503 | -2.42141 | -3.13315 |
| C | -9.91137 | -0.50289 | -1.36992 |
| O | -9.99932 | -0.98736 | -0.23427 |
| N | -9.20741 | 0.591529 | -1.69342 |
| H | -9.12102 | 0.762887 | -2.69656 |
| C | -8.37433 | 1.408683 | -0.82392 |
| H | -8.23705 | 0.90282  | 0.142284 |
| C | -7.01875 | 1.696914 | -1.49455 |
| H | -7.23516 | 1.889773 | -2.56234 |
| C | -6.35817 | 2.951094 | -0.92116 |
| H | -6.99466 | 3.842508 | -1.05069 |
| H | -6.14701 | 2.801109 | 0.148405 |
| H | -5.398   | 3.135494 | -1.42341 |
| C | -6.08331 | 0.488273 | -1.40443 |
| H | -6.58587 | -0.43702 | -1.71374 |
| H | -5.73425 | 0.35568  | -0.37012 |
| H | -5.203   | 0.625785 | -2.05217 |
| C | -2.37659 | 1.543296 | 5.924617 |
| H | -1.42118 | 2.09032  | 5.960814 |
| C | -2.08239 | 0.042142 | 5.935342 |
| H | -1.34951 | -0.16542 | 5.134014 |
| C | -1.46425 | -0.3909  | 7.260216 |
| H | -1.27805 | -1.47705 | 7.268697 |
| H | -2.15041 | -0.17086 | 8.092281 |
| H | -0.50875 | 0.126782 | 7.435702 |
| O | -3.29204 | -0.64946 | 5.670867 |
| H | -3.0741  | -1.56155 | 5.35292  |
| C | -3.14911 | 1.984666 | 4.70981  |
| O | -4.09254 | 2.793982 | 4.805234 |
| N | -2.82128 | 1.45515  | 3.519187 |
| H | -2.09695 | 0.737333 | 3.428177 |
| C | -3.70087 | 1.586149 | 2.381239 |
| H | -3.85345 | 2.63657  | 2.100159 |

|   |          |          |          |
|---|----------|----------|----------|
| H | -3.23349 | 1.078892 | 1.52721  |
| C | -5.07306 | 0.924865 | 2.587172 |
| O | -6.02803 | 1.259381 | 1.878723 |
| N | -5.11143 | -0.01715 | 3.538708 |
| H | -4.29542 | -0.177   | 4.141547 |
| C | -6.24544 | -0.8779  | 3.800221 |
| H | -7.08739 | -0.52656 | 3.187205 |
| C | -5.88856 | -2.32477 | 3.457234 |
| H | -5.07296 | -2.68538 | 4.104417 |
| H | -6.76749 | -2.96692 | 3.632347 |
| O | -5.5278  | -2.46238 | 2.100704 |
| H | -4.6614  | -2.0455  | 1.874172 |
| C | -0.91698 | 8.329948 | 4.623827 |
| H | -0.19348 | 7.951672 | 5.361169 |
| C | -1.83968 | 7.207977 | 4.148855 |
| H | -2.67657 | 7.643776 | 3.579751 |
| H | -2.28604 | 6.737499 | 5.042915 |
| C | -1.17637 | 6.116193 | 3.291496 |
| H | -0.97132 | 6.555503 | 2.298955 |
| C | 0.16221  | 5.633769 | 3.86041  |
| H | 0.92692  | 6.423693 | 3.83865  |
| H | 0.536159 | 4.793841 | 3.261927 |
| H | 0.050017 | 5.270851 | 4.896868 |
| C | -2.14994 | 4.951763 | 3.112375 |
| H | -1.72796 | 4.1751   | 2.461723 |
| H | -3.10738 | 5.29009  | 2.688214 |
| H | -2.37258 | 4.489496 | 4.085024 |
| C | -0.19087 | 9.035616 | 3.495518 |
| O | -0.7429  | 9.357276 | 2.442275 |
| N | 1.104304 | 9.344595 | 3.738563 |
| H | 1.544266 | 8.984898 | 4.575589 |
| C | 1.902963 | 10.06464 | 2.787072 |
| H | 1.342433 | 10.94247 | 2.428169 |
| C | 2.3104   | 9.231667 | 1.563661 |
| O | 2.076146 | 8.030259 | 1.47251  |
| N | 2.922652 | 9.958004 | 0.608718 |
| H | 3.172749 | 10.91752 | 0.813928 |
| C | 3.40798  | 9.362408 | -0.61611 |
| H | 2.572123 | 8.953185 | -1.19633 |
| C | 4.443466 | 8.267023 | -0.34631 |
| O | 5.288678 | 8.373134 | 0.526354 |
| N | 4.342996 | 7.205933 | -1.18439 |
| C | 5.278386 | 6.111375 | -1.10298 |
| C | 5.252692 | 5.357557 | -2.42827 |
| C | 4.997277 | 5.164213 | 0.105614 |
| O | 4.268795 | 5.385092 | -3.17441 |
| C | 3.616285 | 4.601988 | 0.134472 |

|   |          |          |          |
|---|----------|----------|----------|
| C | 3.118879 | 3.334627 | -0.10484 |
| N | 2.503613 | 5.377261 | 0.420155 |
| C | 1.408641 | 4.601731 | 0.335752 |
| N | 1.738065 | 3.349519 | 0.021215 |
| H | 3.511457 | 7.086727 | -1.76692 |
| H | 6.284319 | 6.525539 | -0.93695 |
| H | 5.740035 | 4.354941 | 0.112018 |
| H | 5.175404 | 5.773254 | 1.005105 |
| H | 3.669334 | 2.429905 | -0.35362 |
| H | 0.393734 | 4.952304 | 0.489314 |
| H | 2.480775 | 6.380817 | 0.650106 |
| N | 6.359491 | 4.642917 | -2.71016 |
| H | 7.057793 | 4.466597 | -1.97165 |
| C | 6.325598 | 3.683869 | -3.79101 |
| H | 5.844438 | 4.130917 | -4.6706  |
| C | 5.595803 | 2.424489 | -3.33459 |
| O | 5.838439 | 1.916089 | -2.23332 |
| N | 4.658055 | 1.906338 | -4.14527 |
| C | 3.959695 | 0.70061  | -3.72684 |
| C | 4.944115 | -0.48703 | -3.75018 |
| C | 2.747431 | 0.40989  | -4.6099  |
| O | 5.608974 | -0.71851 | -4.74799 |
| C | 1.718455 | -0.48511 | -3.896   |
| C | 0.823223 | 0.310239 | -2.9701  |
| O | -0.38446 | 0.454532 | -3.26764 |
| O | 1.332462 | 0.846466 | -1.92483 |
| H | 4.567365 | 2.242848 | -5.09703 |
| H | 3.632999 | 0.876467 | -2.69655 |
| H | 2.268346 | 1.357289 | -4.90936 |
| H | 3.089667 | -0.08797 | -5.53069 |
| H | 2.237422 | -1.27573 | -3.33134 |
| H | 1.070505 | -0.98065 | -4.62573 |
| N | 4.975793 | -1.19235 | -2.59911 |
| H | 4.44008  | -0.84647 | -1.78773 |
| C | 5.850878 | -2.31935 | -2.3578  |
| H | 5.511945 | -2.77138 | -1.41353 |
| C | 5.806649 | -3.39322 | -3.46921 |
| H | 6.45687  | -3.12123 | -4.30676 |
| H | 6.177802 | -4.34204 | -3.05004 |
| C | 4.433225 | -3.63394 | -4.07059 |
| O | 3.372466 | -3.64394 | -3.25946 |
| O | 4.269346 | -3.8159  | -5.25882 |
| C | 7.310788 | -1.90377 | -2.1077  |
| O | 8.170769 | -2.75342 | -1.87455 |
| N | 7.578813 | -0.58365 | -2.16665 |
| H | 6.817043 | 0.088566 | -2.22303 |
| C | 8.944845 | -0.07773 | -2.20391 |

|   |          |          |          |
|---|----------|----------|----------|
| H | 9.558841 | -0.90546 | -2.59167 |
| C | 9.064614 | 1.127395 | -3.12412 |
| H | 10.12066 | 1.399405 | -3.25657 |
| H | 8.55516  | 1.997251 | -2.6931  |
| H | 8.629087 | 0.888037 | -4.10537 |
| C | 9.45986  | 0.218608 | -0.77979 |
| O | 9.734616 | 1.353046 | -0.39267 |
| N | 9.591743 | -0.89279 | -0.02803 |
| H | 9.191944 | -1.74875 | -0.41898 |
| C | 10.09281 | -0.89914 | 1.341112 |
| H | 11.09692 | -0.43704 | 1.329528 |
| C | 9.243404 | -0.07774 | 2.329798 |
| H | 9.418343 | 0.981829 | 2.106279 |
| H | 9.650316 | -0.29008 | 3.328716 |
| C | 7.756958 | -0.35133 | 2.315257 |
| C | 6.871033 | 0.595095 | 1.775021 |
| H | 7.269344 | 1.504258 | 1.317283 |
| C | 5.487553 | 0.407247 | 1.858823 |
| H | 4.810572 | 1.181813 | 1.489747 |
| C | 4.972425 | -0.7479  | 2.454428 |
| H | 3.895907 | -0.87173 | 2.566947 |
| C | 5.843514 | -1.72317 | 2.94983  |
| H | 5.439837 | -2.63091 | 3.403948 |
| C | 7.223513 | -1.51817 | 2.8902   |
| H | 7.90391  | -2.25274 | 3.320426 |
| C | 10.2861  | -2.35311 | 1.823593 |
| O | 10.15225 | -2.64843 | 3.000383 |
| N | 10.61762 | -3.25433 | 0.861982 |
| H | 10.72855 | -2.93181 | -0.09147 |
| C | 10.54548 | -4.69281 | 1.075397 |
| H | 10.59627 | -4.85671 | 2.159485 |
| C | 9.269852 | -5.29131 | 0.469497 |
| H | 9.275016 | -5.0909  | -0.61614 |
| H | 9.310404 | -6.38932 | 0.586377 |
| C | 7.953359 | -4.76095 | 1.059802 |
| H | 7.983824 | -3.6583  | 1.013945 |
| C | 6.76643  | -5.19742 | 0.198838 |
| H | 6.912493 | -4.88458 | -0.84623 |
| H | 6.636186 | -6.29346 | 0.217588 |
| H | 5.838115 | -4.7409  | 0.569344 |
| C | 7.753175 | -5.16504 | 2.523903 |
| H | 8.536556 | -4.74412 | 3.171062 |
| H | 6.779702 | -4.81398 | 2.901338 |
| H | 7.771789 | -6.26382 | 2.629647 |
| C | 2.868979 | -6.13129 | 5.867453 |
| H | 3.091939 | -6.32139 | 6.929578 |
| C | 2.656396 | -4.61839 | 5.642779 |

|   |          |          |          |
|---|----------|----------|----------|
| H | 1.668424 | -4.3007  | 6.00954  |
| H | 3.417829 | -4.07769 | 6.225202 |
| C | 2.863794 | -4.21119 | 4.176023 |
| O | 3.976069 | -4.40833 | 3.677783 |
| O | 1.86346  | -3.68949 | 3.559782 |
| C | 1.659853 | -6.95224 | 5.461936 |
| O | 1.54725  | -7.50841 | 4.369561 |
| N | 0.644133 | -6.98147 | 6.373729 |
| H | 0.809164 | -6.57217 | 7.285465 |
| C | -0.54622 | -7.79085 | 6.189209 |
| H | -0.28261 | -8.83889 | 5.975829 |
| C | -1.46997 | -7.36482 | 5.043839 |
| O | -2.36276 | -8.09381 | 4.65632  |
| N | -1.18871 | -6.16174 | 4.472484 |
| H | -0.44198 | -5.59522 | 4.856766 |
| C | -1.84399 | -5.72917 | 3.261063 |
| H | -2.93612 | -5.78623 | 3.386093 |
| C | -1.42063 | -4.29548 | 2.923106 |
| H | -2.02344 | -3.95033 | 2.073741 |
| H | -0.36153 | -4.31598 | 2.643179 |
| C | -1.61197 | -3.32416 | 4.073948 |
| O | -2.73706 | -2.90991 | 4.382704 |
| N | -0.48305 | -2.99303 | 4.718345 |
| H | 0.460746 | -3.21722 | 4.3205   |
| H | -0.53097 | -2.28645 | 5.443728 |
| C | -1.52453 | -6.6152  | 2.039104 |
| O | -2.1893  | -6.46928 | 1.010032 |
| N | -0.49489 | -7.47237 | 2.159397 |
| H | 0.024887 | -7.50598 | 3.03964  |
| C | -0.2152  | -8.51096 | 1.185991 |
| H | -0.6444  | -8.2048  | 0.222514 |
| C | 1.293085 | -8.7868  | 1.043331 |
| H | 1.696918 | -9.09993 | 2.017799 |
| H | 1.412544 | -9.62843 | 0.342673 |
| C | 2.031222 | -7.58159 | 0.546317 |
| C | 2.029362 | -7.25552 | -0.84004 |
| H | 1.565877 | -7.95004 | -1.54521 |
| C | 2.585044 | -6.08597 | -1.29743 |
| H | 2.573612 | -5.82005 | -2.3543  |
| C | 3.167387 | -5.14741 | -0.35702 |
| O | 3.569709 | -3.99714 | -0.71861 |
| H | 3.567716 | -3.66859 | -2.27564 |
| C | 3.236669 | -5.53062 | 1.03259  |
| H | 3.719269 | -4.86897 | 1.75929  |
| C | 2.667417 | -6.70691 | 1.459457 |
| H | 2.68021  | -6.96424 | 2.520273 |
| C | 0.5926   | 7.588208 | -4.13587 |



|   |          |          |          |
|---|----------|----------|----------|
| C | 0.513077 | 7.575993 | -2.61646 |
| C | -0.03347 | 6.309368 | -4.74008 |
| O | 1.489776 | 7.283248 | -1.92317 |
| C | 0.357581 | 5.08373  | -3.98385 |
| C | -0.40068 | 4.217432 | -3.22995 |
| N | 1.66797  | 4.679098 | -3.79515 |
| C | 1.674007 | 3.625648 | -2.96107 |
| N | 0.434846 | 3.317715 | -2.59582 |
| H | 0.094869 | 8.47702  | -4.55367 |
| H | 0.253787 | 6.235221 | -5.80206 |
| H | -1.13145 | 6.376669 | -4.71929 |
| H | -1.47908 | 4.186801 | -3.11052 |
| H | 2.582576 | 3.150078 | -2.61177 |
| H | 2.538106 | 5.177255 | -4.00196 |
| N | -0.68708 | 7.85658  | -2.07867 |
| H | -1.5207  | 7.957102 | -2.65566 |
| C | -0.95166 | 7.79436  | -0.65917 |
| H | -0.36165 | 8.529022 | -0.09061 |
| H | -0.68042 | 6.80232  | -0.25722 |
| C | -2.45184 | 8.003835 | -0.46401 |
| O | -3.23405 | 7.769076 | -1.38441 |
| N | -2.83527 | 8.42519  | 0.75618  |
| H | -2.12284 | 8.732441 | 1.431172 |
| C | -4.23883 | 8.673027 | 1.037017 |
| H | -4.70445 | 9.101852 | 0.135643 |
| C | -5.00296 | 7.409265 | 1.444029 |
| H | -4.8257  | 6.634351 | 0.683498 |
| H | -4.58256 | 7.026229 | 2.388639 |
| C | -6.50618 | 7.640907 | 1.588235 |
| H | -6.94245 | 7.903089 | 0.609967 |
| H | -6.70196 | 8.507777 | 2.246439 |
| C | -7.25973 | 6.425896 | 2.136367 |
| H | -8.34697 | 6.594757 | 2.106384 |
| H | -7.0561  | 5.542529 | 1.515411 |
| N | -6.87497 | 6.122955 | 3.515913 |
| H | -7.04632 | 6.857899 | 4.193881 |
| C | -6.06649 | 5.125278 | 3.912452 |
| N | -5.85162 | 4.045992 | 3.16567  |
| H | -6.48491 | 3.73417  | 2.439203 |
| H | -5.19758 | 3.357306 | 3.575641 |
| N | -5.44539 | 5.200053 | 5.097904 |
| H | -5.38765 | 6.073098 | 5.603957 |
| H | -4.87846 | 4.397186 | 5.39396  |
| C | -5.57638 | 0.939369 | -5.16805 |
| H | -6.5291  | 0.398059 | -5.23453 |
| H | -5.50349 | 1.657368 | -6.00203 |
| N | -4.47881 | -0.01014 | -5.17809 |

|    |          |          |          |
|----|----------|----------|----------|
| H  | -4.61875 | -0.98663 | -5.50214 |
| C  | -3.22586 | 0.282316 | -4.82826 |
| N  | -2.91272 | 1.473994 | -4.27629 |
| H  | -3.6261  | 2.031194 | -3.82298 |
| H  | -1.97334 | 1.584556 | -3.90123 |
| N  | -2.25208 | -0.59984 | -5.04186 |
| H  | -2.44084 | -1.52732 | -5.40641 |
| H  | -1.33704 | -0.43696 | -4.6213  |
| O  | -2.81976 | 2.586887 | -1.52127 |
| C  | -2.35932 | 3.454639 | -0.75329 |
| O  | -1.15178 | 3.46746  | -0.32013 |
| C  | -3.21203 | 4.617926 | -0.30064 |
| H  | -4.14567 | 4.241435 | 0.137663 |
| H  | -2.68368 | 5.234368 | 0.431784 |
| O  | -0.31528 | 0.982292 | 0.266779 |
| O  | -1.25909 | -0.58377 | 2.26754  |
| Fe | 0.123018 | 2.121834 | -0.93365 |
| C  | -2.90271 | -1.42668 | -1.57026 |
| N  | -2.24502 | -0.12095 | -1.33527 |
| H  | -1.63608 | -0.04122 | -0.49153 |
| H  | -1.60019 | 0.118172 | -2.1174  |
| H  | -2.88337 | 0.688977 | -1.26591 |
| C  | -3.68248 | -1.91086 | -0.3348  |
| O  | -3.41787 | -1.3711  | 0.783827 |
| O  | -4.48143 | -2.83017 | -0.56379 |
| C  | -1.9242  | -2.5138  | -2.03786 |
| C  | -1.00419 | -3.10144 | -0.96352 |
| C  | 0.284526 | -2.34293 | -0.60183 |
| C  | 0.766947 | -2.89157 | 0.734134 |
| N  | 2.084305 | -2.43367 | 1.217136 |
| H  | 2.094718 | -1.39485 | 1.329351 |
| H  | 2.212125 | -2.89818 | 2.176956 |
| H  | 2.847474 | -2.69992 | 0.575077 |
| H  | -8.89765 | 2.359916 | -0.62106 |
| H  | 2.814142 | 10.42806 | 3.286129 |
| H  | 3.897015 | 10.14777 | -1.21043 |
| H  | 7.35509  | 3.402637 | -4.05551 |
| H  | 11.43383 | -5.16639 | 0.627952 |
| H  | -1.51107 | 9.103194 | 5.14145  |
| H  | -4.29565 | 9.429007 | 1.835728 |
| H  | 1.659568 | 7.650798 | -4.39085 |
| H  | -3.47601 | 5.244905 | -1.16546 |
| H  | 3.73327  | -6.46059 | 5.275569 |
| H  | -0.71944 | -9.44703 | 1.484418 |
| H  | -1.12966 | -7.78462 | 7.120667 |
| H  | -2.9845  | 1.82009  | 6.797423 |
| H  | -6.53215 | -0.80342 | 4.86283  |

|   |          |          |          |
|---|----------|----------|----------|
| H | -0.18374 | -7.20286 | -3.13312 |
| H | -3.8762  | -9.03831 | -2.04091 |
| H | -7.3177  | -2.33319 | -5.52209 |
| H | -0.88219 | -0.02161 | 1.546535 |
| H | -2.03324 | -1.01489 | 1.836342 |
| H | 0.045849 | -2.59534 | 1.50345  |
| H | 0.792946 | -3.99059 | 0.709285 |
| H | 0.127098 | -1.25824 | -0.50611 |
| H | 1.048163 | -2.4865  | -1.38399 |
| H | -1.59498 | -3.26777 | -0.04876 |
| H | -0.71084 | -4.11095 | -1.28398 |
| H | -1.35449 | -2.16608 | -2.91198 |
| H | -2.57662 | -3.31671 | -2.40794 |
| H | -3.63241 | -1.26826 | -2.37567 |
| H | -5.61154 | 1.503698 | -4.22252 |
| O | 1.997018 | 0.338504 | 1.599381 |
| H | 1.181453 | 0.595316 | 1.102926 |
| H | 1.708866 | 0.175318 | 2.536326 |
| O | 0.162584 | 2.574556 | 2.44815  |
| H | -0.29194 | 2.06346  | 1.737922 |
| H | 1.01985  | 2.741813 | 2.022382 |
| O | 3.317216 | -0.40541 | -0.60301 |
| H | 2.556926 | 0.029942 | -1.04132 |
| H | 3.293557 | -0.04669 | 0.302947 |
| O | 1.000033 | -0.45406 | 3.941967 |
| H | 0.142419 | -0.66581 | 3.525134 |
| H | 0.843066 | 0.357725 | 4.476346 |
| O | 0.543257 | 2.020752 | 5.017169 |
| H | 0.352606 | 2.287829 | 4.07949  |
| H | 1.378358 | 2.454222 | 5.240214 |
| O | 7.721423 | 3.292968 | -0.68669 |
| H | 7.095197 | 2.630711 | -1.03694 |
| H | 8.547577 | 2.787525 | -0.52976 |

<sup>5</sup>Re<sub>C</sub>

|   |          |          |          |
|---|----------|----------|----------|
| C | -0.37229 | -6.40968 | -2.9972  |
| H | -0.09912 | -5.98208 | -2.02067 |
| C | -0.38611 | -5.34859 | -4.09488 |
| H | -0.61318 | -5.84228 | -5.05231 |
| H | -1.20276 | -4.63922 | -3.91604 |
| C | 0.908967 | -4.55293 | -4.23047 |
| H | 1.179022 | -4.08439 | -3.26968 |
| H | 1.758392 | -5.1954  | -4.50704 |
| C | 0.754914 | -3.41789 | -5.23659 |
| O | -0.30238 | -2.78338 | -5.32075 |
| N | 1.821875 | -3.14686 | -6.00878 |
| H | 2.772629 | -3.48097 | -5.81047 |
| H | 1.735476 | -2.3729  | -6.65902 |
| C | -1.69509 | -7.16103 | -2.8917  |
| O | -2.34064 | -7.46805 | -3.89994 |
| N | -2.08012 | -7.50958 | -1.64797 |
| H | -1.6357  | -7.10051 | -0.82008 |
| C | -3.19493 | -8.40761 | -1.38118 |
| H | -3.04696 | -8.78455 | -0.35802 |
| C | -4.59047 | -7.78711 | -1.50333 |
| H | -4.78158 | -7.56658 | -2.56604 |
| H | -5.32113 | -8.56357 | -1.21701 |
| C | -4.80067 | -6.53581 | -0.6522  |
| H | -4.1156  | -5.73485 | -0.97385 |
| H | -4.54513 | -6.73665 | 0.401021 |
| C | -6.23499 | -6.01591 | -0.73965 |
| H | -6.52777 | -5.89626 | -1.80133 |
| H | -6.9252  | -6.76064 | -0.3017  |
| N | -6.35324 | -4.7478  | -0.03931 |
| H | -5.47894 | -4.22063 | 0.128797 |
| C | -7.46025 | -4.01354 | 0.035329 |
| N | -8.64292 | -4.47712 | -0.46156 |
| H | -8.76633 | -5.47848 | -0.55009 |
| H | -9.4631  | -3.92542 | -0.20532 |
| N | -7.41037 | -2.79507 | 0.558242 |
| H | -6.54737 | -2.54946 | 1.07653  |
| H | -8.27285 | -2.24738 | 0.614976 |
| C | -7.33525 | -3.0886  | -4.38335 |
| H | -7.65691 | -4.14161 | -4.38456 |
| C | -6.02486 | -2.94806 | -3.57782 |
| H | -5.77146 | -1.88357 | -3.48594 |
| H | -6.14079 | -3.3256  | -2.55206 |
| C | -4.91804 | -3.68382 | -4.25893 |
| N | -4.32403 | -3.20914 | -5.41505 |
| C | -3.49661 | -4.16463 | -5.82407 |

|   |          |          |          |
|---|----------|----------|----------|
| H | -2.83923 | -4.11347 | -6.69036 |
| N | -3.53657 | -5.23083 | -4.99117 |
| H | -2.97444 | -6.09304 | -4.99059 |
| C | -4.42672 | -4.94085 | -3.98647 |
| H | -4.6238  | -5.63624 | -3.18219 |
| C | -8.43279 | -2.18072 | -3.87525 |
| O | -8.45649 | -0.97619 | -4.13369 |
| N | -9.37461 | -2.7729  | -3.09666 |
| H | -9.20155 | -3.71431 | -2.75918 |
| C | -10.4521 | -2.01808 | -2.46265 |
| H | -10.7621 | -1.25226 | -3.18863 |
| C | -11.6324 | -2.91653 | -2.13086 |
| H | -12.4395 | -2.3343  | -1.66494 |
| H | -11.3515 | -3.70903 | -1.42156 |
| H | -12.0193 | -3.38562 | -3.0467  |
| C | -9.87547 | -1.30437 | -1.22331 |
| O | -9.91468 | -1.82666 | -0.10138 |
| N | -9.28807 | -0.1343  | -1.51174 |
| H | -9.20819 | 0.071029 | -2.50896 |
| C | -8.54218 | 0.729344 | -0.60954 |
| H | -8.36849 | 0.205592 | 0.34118  |
| C | -7.21115 | 1.161982 | -1.24724 |
| H | -7.43469 | 1.421686 | -2.29972 |
| C | -6.65151 | 2.413894 | -0.56847 |
| H | -7.34957 | 3.26469  | -0.64721 |
| H | -6.44341 | 2.197263 | 0.489176 |
| H | -5.6995  | 2.695932 | -1.03626 |
| C | -6.19144 | 0.019477 | -1.23889 |
| H | -6.61684 | -0.90406 | -1.65149 |
| H | -5.86163 | -0.18642 | -0.2109  |
| H | -5.30567 | 0.284613 | -1.83537 |
| C | -2.32051 | 1.318806 | 5.92673  |
| H | -1.41834 | 1.949667 | 5.935091 |
| C | -1.88734 | -0.1481  | 5.950968 |
| H | -1.18075 | -0.30989 | 5.116155 |
| C | -1.16507 | -0.48759 | 7.250314 |
| H | -0.88863 | -1.55417 | 7.277133 |
| H | -1.82143 | -0.30095 | 8.113988 |
| H | -0.24894 | 0.112792 | 7.356954 |
| O | -3.04066 | -0.95192 | 5.766639 |
| H | -2.75907 | -1.85144 | 5.465824 |
| C | -3.16579 | 1.674424 | 4.731302 |
| O | -4.15766 | 2.422294 | 4.845876 |
| N | -2.84603 | 1.139262 | 3.540833 |
| H | -2.06446 | 0.484562 | 3.432707 |
| C | -3.78457 | 1.153196 | 2.441099 |
| H | -4.05352 | 2.173572 | 2.139045 |

|   |          |          |          |
|---|----------|----------|----------|
| H | -3.30938 | 0.66806  | 1.578131 |
| C | -5.07039 | 0.360585 | 2.723176 |
| O | -6.08752 | 0.580843 | 2.05856  |
| N | -4.97042 | -0.56591 | 3.686184 |
| H | -4.12085 | -0.63214 | 4.258892 |
| C | -5.98611 | -1.55923 | 3.964901 |
| H | -6.90463 | -1.26295 | 3.439093 |
| C | -5.50891 | -2.93343 | 3.491373 |
| H | -4.62242 | -3.25033 | 4.063682 |
| H | -6.30717 | -3.67469 | 3.662019 |
| O | -5.2212  | -2.93299 | 2.109482 |
| H | -4.39613 | -2.44573 | 1.871566 |
| C | -1.9962  | 7.911288 | 4.634958 |
| H | -1.30996 | 7.578138 | 5.427335 |
| C | -2.67809 | 6.716788 | 3.964442 |
| H | -3.50296 | 7.085639 | 3.336516 |
| H | -3.14063 | 6.092882 | 4.749424 |
| C | -1.76028 | 5.835706 | 3.101218 |
| H | -1.44823 | 6.440024 | 2.230631 |
| C | -0.48661 | 5.410097 | 3.838083 |
| H | 0.163492 | 6.270136 | 4.053446 |
| H | 0.085167 | 4.70211  | 3.226033 |
| H | -0.72645 | 4.899143 | 4.787063 |
| C | -2.54776 | 4.627393 | 2.590517 |
| H | -1.95007 | 4.005597 | 1.910327 |
| H | -3.45802 | 4.946057 | 2.059677 |
| H | -2.86952 | 3.995906 | 3.430542 |
| C | -1.26662 | 8.79185  | 3.639481 |
| O | -1.78563 | 9.18322  | 2.592947 |
| N | -0.00777 | 9.152216 | 3.98098  |
| H | 0.413572 | 8.740316 | 4.803228 |
| C | 0.795745 | 9.983326 | 3.128536 |
| H | 0.222619 | 10.87767 | 2.837113 |
| C | 1.269696 | 9.277199 | 1.850722 |
| O | 1.152766 | 8.066127 | 1.681693 |
| N | 1.813036 | 10.11674 | 0.948997 |
| H | 1.968151 | 11.08069 | 1.218092 |
| C | 2.396918 | 9.641188 | -0.28542 |
| H | 1.629617 | 9.170341 | -0.9116  |
| C | 3.538451 | 8.652671 | -0.02689 |
| O | 4.320697 | 8.793502 | 0.898422 |
| N | 3.599314 | 7.642654 | -0.92872 |
| C | 4.632281 | 6.639305 | -0.84815 |
| C | 4.712504 | 5.927478 | -2.19613 |
| C | 4.393913 | 5.629525 | 0.319192 |
| O | 3.757885 | 5.919164 | -2.97882 |
| C | 3.078161 | 4.932528 | 0.241578 |

|   |          |          |          |
|---|----------|----------|----------|
| C | 2.739557 | 3.646654 | -0.12693 |
| N | 1.87221  | 5.573298 | 0.4852   |
| C | 0.87061  | 4.714101 | 0.25055  |
| N | 1.357864 | 3.529693 | -0.11941 |
| H | 2.814383 | 7.468908 | -1.56079 |
| H | 5.591074 | 7.135522 | -0.63382 |
| H | 5.212212 | 4.896541 | 0.339165 |
| H | 4.460865 | 6.221326 | 1.244407 |
| H | 3.396161 | 2.82459  | -0.40321 |
| H | -0.18497 | 4.950533 | 0.338444 |
| H | 1.730342 | 6.551266 | 0.783355 |
| N | 5.871423 | 5.292212 | -2.45352 |
| H | 6.559779 | 5.14289  | -1.69931 |
| C | 5.945446 | 4.375424 | -3.56786 |
| H | 5.445667 | 4.813125 | -4.44166 |
| C | 5.319718 | 3.035774 | -3.18637 |
| O | 5.527878 | 2.528526 | -2.07705 |
| N | 4.514499 | 2.442042 | -4.08311 |
| C | 3.916411 | 1.154052 | -3.76124 |
| C | 5.011836 | 0.069094 | -3.78332 |
| C | 2.784691 | 0.805336 | -4.72702 |
| O | 5.745355 | -0.05236 | -4.75206 |
| C | 1.82041  | -0.24483 | -4.15149 |
| C | 0.831225 | 0.332957 | -3.16076 |
| O | -0.39224 | 0.264511 | -3.40948 |
| O | 1.272527 | 0.884334 | -2.09205 |
| H | 4.466866 | 2.795324 | -5.03227 |
| H | 3.519655 | 1.243564 | -2.74478 |
| H | 2.222895 | 1.719058 | -4.98191 |
| H | 3.225303 | 0.420398 | -5.66036 |
| H | 2.388509 | -1.05318 | -3.66142 |
| H | 1.237038 | -0.709   | -4.95291 |
| N | 5.059984 | -0.6767  | -2.6581  |
| H | 4.45395  | -0.42749 | -1.86073 |
| C | 6.034411 | -1.71777 | -2.41275 |
| H | 5.723946 | -2.2122  | -1.47975 |
| C | 6.105802 | -2.77397 | -3.53826 |
| H | 6.721641 | -2.4197  | -4.37108 |
| H | 6.575575 | -3.68466 | -3.13412 |
| C | 4.761128 | -3.14511 | -4.14012 |
| O | 3.715463 | -3.30393 | -3.32384 |
| O | 4.607029 | -3.29986 | -5.3331  |
| C | 7.441954 | -1.16381 | -2.13174 |
| O | 8.390572 | -1.92534 | -1.94559 |
| N | 7.565788 | 0.179872 | -2.10914 |
| H | 6.73583  | 0.767226 | -2.13419 |
| C | 8.870653 | 0.827173 | -2.14384 |

|   |          |          |          |
|---|----------|----------|----------|
| H | 9.558984 | 0.084736 | -2.57644 |
| C | 8.846916 | 2.074944 | -3.01231 |
| H | 9.866294 | 2.459701 | -3.15256 |
| H | 8.262549 | 2.868586 | -2.53208 |
| H | 8.414583 | 1.833383 | -3.99444 |
| C | 9.378302 | 1.116881 | -0.71656 |
| O | 9.521313 | 2.257785 | -0.27962 |
| N | 9.657609 | -0.00476 | -0.02309 |
| H | 9.348746 | -0.88104 | -0.45016 |
| C | 10.16973 | -0.01937 | 1.342238 |
| H | 11.12272 | 0.540641 | 1.347745 |
| C | 9.247192 | 0.666595 | 2.368688 |
| H | 9.311587 | 1.747419 | 2.193822 |
| H | 9.676431 | 0.450029 | 3.356906 |
| C | 7.798621 | 0.238875 | 2.331154 |
| C | 6.82647  | 1.08532  | 1.773905 |
| H | 7.131192 | 2.038534 | 1.335887 |
| C | 5.471436 | 0.74291  | 1.817357 |
| H | 4.721647 | 1.437094 | 1.430166 |
| C | 5.074509 | -0.46581 | 2.396336 |
| H | 4.017118 | -0.71022 | 2.484122 |
| C | 6.035323 | -1.34026 | 2.912731 |
| H | 5.722702 | -2.28989 | 3.352057 |
| C | 7.385159 | -0.98369 | 2.887775 |
| H | 8.133738 | -1.6434  | 3.326311 |
| C | 10.50729 | -1.46704 | 1.76146  |
| O | 10.4125  | -1.82176 | 2.925527 |
| N | 10.91319 | -2.29295 | 0.761575 |
| H | 10.99016 | -1.92265 | -0.17778 |
| C | 10.97512 | -3.73973 | 0.91514  |
| H | 11.055   | -3.94248 | 1.990856 |
| C | 9.750982 | -4.42709 | 0.297088 |
| H | 9.721057 | -4.17991 | -0.77843 |
| H | 9.894522 | -5.52062 | 0.364282 |
| C | 8.400306 | -4.04691 | 0.925098 |
| H | 8.327551 | -2.9452  | 0.926771 |
| C | 7.244941 | -4.55624 | 0.061081 |
| H | 7.347636 | -4.19427 | -0.97325 |
| H | 7.213712 | -5.65949 | 0.04004  |
| H | 6.284165 | -4.19839 | 0.456558 |
| C | 8.26247  | -4.52845 | 2.37285  |
| H | 9.012522 | -4.06191 | 3.02819  |
| H | 7.266282 | -4.28719 | 2.775985 |
| H | 8.386177 | -5.62392 | 2.431507 |
| C | 3.485435 | -5.99961 | 5.751522 |
| H | 3.737238 | -6.18619 | 6.807694 |
| C | 3.15062  | -4.50532 | 5.551801 |



|   |          |          |          |
|---|----------|----------|----------|
| H | 2.145036 | -4.27279 | 5.934249 |
| H | 3.873506 | -3.91341 | 6.133667 |
| C | 3.309549 | -4.06373 | 4.089301 |
| O | 4.4289   | -4.1663  | 3.579871 |
| O | 2.264846 | -3.61273 | 3.48948  |
| C | 2.336995 | -6.90422 | 5.34807  |
| O | 2.24714  | -7.44344 | 4.245108 |
| N | 1.343006 | -7.02933 | 6.275127 |
| H | 1.491849 | -6.62656 | 7.192532 |
| C | 0.2102   | -7.91676 | 6.088824 |
| H | 0.544165 | -8.93696 | 5.841831 |
| C | -0.76392 | -7.52767 | 4.972332 |
| O | -1.6155  | -8.30525 | 4.586649 |
| N | -0.57455 | -6.29664 | 4.422426 |
| H | 0.144079 | -5.69139 | 4.801153 |
| C | -1.28532 | -5.88368 | 3.235687 |
| H | -2.36597 | -6.03612 | 3.379272 |
| C | -0.98967 | -4.40994 | 2.934765 |
| H | -1.64817 | -4.08419 | 2.119416 |
| H | 0.056234 | -4.33632 | 2.618507 |
| C | -1.21171 | -3.4961  | 4.126149 |
| O | -2.35185 | -3.18585 | 4.494456 |
| N | -0.0883  | -3.09296 | 4.738672 |
| H | 0.853451 | -3.23372 | 4.302812 |
| H | -0.16621 | -2.42168 | 5.494509 |
| C | -0.92064 | -6.70745 | 1.9828   |
| O | -1.60666 | -6.57735 | 0.965702 |
| N | 0.164297 | -7.49863 | 2.067361 |
| H | 0.696673 | -7.52146 | 2.940222 |
| C | 0.495793 | -8.49347 | 1.064616 |
| H | 0.032648 | -8.19389 | 0.115103 |
| C | 2.015897 | -8.67028 | 0.892974 |
| H | 2.454059 | -8.97947 | 1.853805 |
| H | 2.175247 | -9.48739 | 0.171482 |
| C | 2.671627 | -7.41192 | 0.412236 |
| C | 2.627177 | -7.05614 | -0.96623 |
| H | 2.194948 | -7.76203 | -1.6797  |
| C | 3.103541 | -5.84524 | -1.4054  |
| H | 3.058839 | -5.5558  | -2.45517 |
| C | 3.642345 | -4.89395 | -0.45241 |
| O | 3.962683 | -3.71178 | -0.79214 |
| H | 3.919973 | -3.33796 | -2.34281 |
| C | 3.759839 | -5.30348 | 0.926417 |
| H | 4.211355 | -4.62795 | 1.659999 |
| C | 3.27084  | -6.5216  | 1.335101 |
| H | 3.31641  | -6.80093 | 2.389427 |
| C | -0.01377 | 7.746412 | -4.02624 |

|   |          |          |          |
|---|----------|----------|----------|
| C | -0.16849 | 7.702506 | -2.51353 |
| C | -0.52047 | 6.4553   | -4.70573 |
| O | 0.782081 | 7.427021 | -1.7769  |
| C | -0.02573 | 5.215687 | -4.03763 |
| C | -0.71164 | 4.173549 | -3.45449 |
| N | 1.310081 | 4.939801 | -3.806   |
| C | 1.387548 | 3.788144 | -3.11075 |
| N | 0.179196 | 3.294645 | -2.87141 |
| H | -0.54413 | 8.614054 | -4.44859 |
| H | -0.22538 | 6.478556 | -5.76844 |
| H | -1.6204  | 6.424858 | -4.69085 |
| H | -1.78513 | 4.01395  | -3.43571 |
| H | 2.329121 | 3.378291 | -2.76394 |
| H | 2.123705 | 5.555105 | -3.88994 |
| N | -1.39757 | 7.956827 | -2.02739 |
| H | -2.20543 | 8.052842 | -2.64085 |
| C | -1.71923 | 7.924069 | -0.61944 |
| H | -1.27507 | 8.768109 | -0.06738 |
| H | -1.3152  | 7.011605 | -0.14953 |
| C | -3.24313 | 7.92692  | -0.48893 |
| O | -3.94878 | 7.671328 | -1.46212 |
| N | -3.7264  | 8.198713 | 0.739189 |
| H | -3.08313 | 8.524023 | 1.472107 |
| C | -5.1591  | 8.217512 | 0.979201 |
| H | -5.65775 | 8.580202 | 0.067296 |
| C | -5.72348 | 6.842558 | 1.354376 |
| H | -5.43022 | 6.116287 | 0.580172 |
| H | -5.24977 | 6.509555 | 2.292096 |
| C | -7.2437  | 6.835539 | 1.509889 |
| H | -7.7277  | 6.990973 | 0.531495 |
| H | -7.56896 | 7.682315 | 2.142684 |
| C | -7.78431 | 5.535498 | 2.112692 |
| H | -8.88489 | 5.522222 | 2.087508 |
| H | -7.43815 | 4.674114 | 1.525241 |
| N | -7.34215 | 5.359842 | 3.497348 |
| H | -7.58736 | 6.105317 | 4.140114 |
| C | -6.4367  | 4.468063 | 3.933812 |
| N | -6.13119 | 3.372936 | 3.249065 |
| H | -6.72781 | 2.965613 | 2.538653 |
| H | -5.38752 | 2.787183 | 3.665988 |
| N | -5.80793 | 4.671666 | 5.102444 |
| H | -5.81852 | 5.578197 | 5.549225 |
| H | -5.14682 | 3.955793 | 5.421396 |
| C | -5.62981 | 0.600433 | -4.98538 |
| H | -6.56755 | 0.03124  | -5.02916 |
| H | -5.62926 | 1.369034 | -5.77623 |
| N | -4.5098  | -0.3129  | -5.12478 |

|    |          |          |          |
|----|----------|----------|----------|
| H  | -4.64713 | -1.2799  | -5.46415 |
| C  | -3.23763 | 0.014883 | -4.89234 |
| N  | -2.91087 | 1.217166 | -4.37353 |
| H  | -3.57075 | 1.698642 | -3.76759 |
| H  | -1.93762 | 1.320917 | -4.09109 |
| N  | -2.26688 | -0.84101 | -5.20704 |
| H  | -2.49443 | -1.77011 | -5.54304 |
| H  | -1.32929 | -0.70143 | -4.83262 |
| O  | -3.34614 | 2.196642 | -1.70369 |
| C  | -2.80267 | 3.193192 | -1.18497 |
| O  | -1.61525 | 3.194692 | -0.70488 |
| C  | -3.52024 | 4.521201 | -1.11096 |
| H  | -4.5484  | 4.46017  | -1.4836  |
| H  | -3.52002 | 4.879819 | -0.07317 |
| O  | -0.28755 | 0.897026 | 0.332257 |
| O  | -1.10133 | -0.73918 | 2.291434 |
| Fe | 0.052834 | 2.115864 | -0.92504 |
| C  | -2.72427 | -1.62607 | -1.58698 |
| N  | -2.12864 | -0.2879  | -1.35371 |
| H  | -1.56346 | -0.17932 | -0.4851  |
| H  | -1.47305 | -0.05503 | -2.13402 |
| H  | -2.80747 | 0.505053 | -1.34446 |
| C  | -3.47573 | -2.16292 | -0.35374 |
| O  | -3.20132 | -1.66063 | 0.780311 |
| O  | -4.25815 | -3.09281 | -0.59901 |
| C  | -1.68832 | -2.65911 | -2.05912 |
| C  | -0.72406 | -3.18618 | -0.99068 |
| C  | 0.522169 | -2.35083 | -0.64617 |
| C  | 1.055161 | -2.87337 | 0.681233 |
| N  | 2.341084 | -2.32829 | 1.165587 |
| H  | 2.290023 | -1.30079 | 1.280803 |
| H  | 2.508461 | -2.79282 | 2.125325 |
| H  | 3.118797 | -2.5321  | 0.516699 |
| H  | -9.15365 | 1.621132 | -0.38328 |
| H  | 1.682057 | 10.31846 | 3.688521 |
| H  | 2.81058  | 10.50431 | -0.82669 |
| H  | 7.001117 | 4.196865 | -3.81852 |
| H  | 11.8969  | -4.11083 | 0.439665 |
| H  | -2.75443 | 8.547479 | 5.122677 |
| H  | -5.36101 | 8.942736 | 1.783403 |
| H  | 1.058712 | 7.884916 | -4.22319 |
| H  | -2.97453 | 5.271968 | -1.69931 |
| H  | 4.364353 | -6.2516  | 5.143444 |
| H  | 0.057163 | -9.46674 | 1.34732  |
| H  | -0.35417 | -7.978   | 7.029953 |
| H  | -2.92595 | 1.551353 | 6.814223 |
| H  | -6.19282 | -1.58357 | 5.047641 |

|   |          |          |          |
|---|----------|----------|----------|
| H | 0.39497  | -7.17206 | -3.22209 |
| H | -3.1276  | -9.26155 | -2.07232 |
| H | -7.14266 | -2.8058  | -5.42859 |
| H | -0.7819  | -0.13281 | 1.567116 |
| H | -1.8351  | -1.23012 | 1.855958 |
| H | 0.319925 | -2.63858 | 1.457915 |
| H | 1.16615  | -3.96703 | 0.64632  |
| H | 0.297014 | -1.27896 | -0.54493 |
| H | 1.282145 | -2.44354 | -1.43966 |
| H | -1.29445 | -3.38229 | -0.06892 |
| H | -0.37429 | -4.17771 | -1.30997 |
| H | -1.14713 | -2.28016 | -2.93883 |
| H | -2.29453 | -3.50179 | -2.41916 |
| H | -3.46245 | -1.50341 | -2.39119 |
| H | -5.61534 | 1.104582 | -4.00598 |
| O | 2.062497 | 0.54741  | 1.576475 |
| H | 1.196105 | 0.614946 | 1.091435 |
| H | 1.827971 | 0.225883 | 2.49227  |
| O | 0.213438 | 2.530768 | 2.501081 |
| H | -0.2664  | 2.008526 | 1.815758 |
| H | 1.131528 | 2.41685  | 2.199245 |
| O | 3.280607 | -0.22555 | -0.67176 |
| H | 2.50436  | 0.123866 | -1.15579 |
| H | 3.205895 | 0.175116 | 0.216768 |
| O | 1.204867 | -0.49716 | 3.851397 |
| H | 0.339248 | -0.75716 | 3.476287 |
| H | 1.020469 | 0.272834 | 4.436554 |
| O | 0.592787 | 1.882148 | 5.057403 |
| H | 0.358629 | 2.196479 | 4.145366 |
| H | 1.361702 | 2.406259 | 5.320365 |
| O | 7.306593 | 3.984026 | -0.46446 |
| H | 6.738533 | 3.285945 | -0.84289 |
| H | 8.180011 | 3.55302  | -0.34194 |

<sup>5</sup>TS1<sub>C,C3</sub>

|   |          |          |          |
|---|----------|----------|----------|
| C | 3.768861 | -6.51274 | -2.05125 |
| H | 3.973604 | -6.15072 | -1.03283 |
| C | 2.907821 | -5.53384 | -2.84307 |
| H | 2.620085 | -6.01309 | -3.78214 |
| H | 1.967554 | -5.34118 | -2.30085 |
| C | 3.571696 | -4.21867 | -3.21145 |
| H | 3.770626 | -3.57857 | -2.33801 |
| H | 4.554829 | -4.40125 | -3.68335 |
| C | 2.732317 | -3.45001 | -4.22605 |
| O | 1.781845 | -3.97999 | -4.8068  |
| N | 3.107812 | -2.17764 | -4.448   |
| H | 3.931606 | -1.7698  | -4.00886 |
| H | 2.719254 | -1.67433 | -5.2363  |
| C | 3.090824 | -7.87895 | -2.00435 |
| O | 2.645029 | -8.41468 | -3.02875 |
| N | 3.007242 | -8.44856 | -0.79323 |
| H | 3.275822 | -7.88988 | 0.021465 |
| C | 2.310254 | -9.70188 | -0.55531 |
| H | 2.526883 | -9.99018 | 0.484424 |
| C | 0.794321 | -9.62218 | -0.77781 |
| H | 0.605205 | -9.55166 | -1.86073 |
| H | 0.352442 | -10.5761 | -0.44084 |
| C | 0.116867 | -8.44724 | -0.07267 |
| H | 0.514533 | -7.49258 | -0.45209 |
| H | 0.340005 | -8.45069 | 1.007942 |
| C | -1.3956  | -8.46438 | -0.2858  |
| H | -1.61677 | -8.63532 | -1.35409 |
| H | -1.8406  | -9.31168 | 0.271618 |
| N | -1.98856 | -7.20207 | 0.119134 |
| H | -1.44824 | -6.55411 | 0.713085 |
| C | -3.17336 | -6.75821 | -0.28315 |
| N | -4.03867 | -7.58423 | -0.91778 |
| H | -3.95166 | -8.57784 | -0.74578 |
| H | -4.98249 | -7.20624 | -1.08618 |
| N | -3.50464 | -5.47693 | -0.11633 |
| H | -2.82302 | -4.79846 | 0.255384 |
| H | -4.48518 | -5.20089 | -0.12876 |
| C | -3.65532 | -6.34795 | -4.23819 |
| H | -3.53109 | -7.38198 | -3.88381 |
| C | -2.52347 | -5.47999 | -3.66975 |
| H | -2.68935 | -4.43939 | -3.98734 |
| H | -2.55018 | -5.48873 | -2.57218 |
| C | -1.21075 | -6.00383 | -4.15251 |
| N | -0.83441 | -5.91996 | -5.48191 |
| C | 0.277519 | -6.63311 | -5.59578 |

|   |          |          |          |
|---|----------|----------|----------|
| H | 0.865442 | -6.75425 | -6.5035  |
| N | 0.620295 | -7.19147 | -4.41327 |
| H | 1.467383 | -7.73037 | -4.16377 |
| C | -0.3012  | -6.78645 | -3.47807 |
| H | -0.22326 | -7.04268 | -2.42877 |
| C | -5.04046 | -5.83619 | -3.91418 |
| O | -5.3228  | -4.64191 | -3.89379 |
| N | -5.97391 | -6.79923 | -3.67848 |
| H | -5.67036 | -7.76266 | -3.61146 |
| C | -7.30667 | -6.46297 | -3.23213 |
| H | -7.74784 | -5.75793 | -3.95562 |
| C | -8.17212 | -7.7193  | -3.13087 |
| H | -9.19246 | -7.46071 | -2.81517 |
| H | -7.75574 | -8.41547 | -2.38571 |
| H | -8.22914 | -8.22917 | -4.10405 |
| C | -7.21836 | -5.76104 | -1.86538 |
| O | -6.37323 | -6.09752 | -1.03434 |
| N | -8.14485 | -4.81709 | -1.64043 |
| H | -8.74182 | -4.55478 | -2.4175  |
| C | -8.15766 | -3.95901 | -0.4676  |
| H | -7.38543 | -4.33027 | 0.220783 |
| C | -7.8745  | -2.49302 | -0.8312  |
| H | -8.64263 | -2.17222 | -1.56212 |
| C | -8.03391 | -1.6344  | 0.427424 |
| H | -9.03362 | -1.76865 | 0.876077 |
| H | -7.27732 | -1.94655 | 1.164716 |
| H | -7.90253 | -0.56508 | 0.199366 |
| C | -6.48969 | -2.33433 | -1.46655 |
| H | -6.36058 | -2.9989  | -2.33344 |
| H | -5.7098  | -2.58803 | -0.73285 |
| H | -6.31256 | -1.30518 | -1.80891 |
| C | -2.84453 | -0.8841  | 5.511635 |
| H | -2.67998 | 0.199151 | 5.6253   |
| C | -1.48654 | -1.55318 | 5.306346 |
| H | -0.98342 | -1.04201 | 4.474565 |
| C | -0.59841 | -1.42095 | 6.536919 |
| H | 0.37661  | -1.89775 | 6.351737 |
| H | -1.06167 | -1.91986 | 7.402418 |
| H | -0.42538 | -0.36178 | 6.781016 |
| O | -1.68837 | -2.91533 | 4.95621  |
| H | -0.89622 | -3.20091 | 4.442179 |
| C | -3.81743 | -1.11434 | 4.382406 |
| O | -5.03247 | -1.28614 | 4.619204 |
| N | -3.34779 | -1.16467 | 3.129373 |
| H | -2.35571 | -1.01738 | 2.901906 |
| C | -4.12725 | -1.72596 | 2.050749 |
| H | -5.0964  | -1.22538 | 1.938829 |

|   |          |          |          |
|---|----------|----------|----------|
| H | -3.569   | -1.58353 | 1.115596 |
| C | -4.38921 | -3.23483 | 2.167394 |
| O | -5.26197 | -3.74227 | 1.459648 |
| N | -3.5904  | -3.89913 | 3.016149 |
| H | -2.93172 | -3.37749 | 3.604557 |
| C | -3.61074 | -5.33425 | 3.221892 |
| H | -4.10828 | -5.79541 | 2.359696 |
| C | -2.19726 | -5.89643 | 3.414124 |
| H | -1.76085 | -5.47296 | 4.335667 |
| H | -2.28931 | -6.98492 | 3.574545 |
| O | -1.34315 | -5.67194 | 2.315362 |
| H | -0.76405 | -4.89979 | 2.481548 |
| C | -5.8946  | 5.549971 | 5.196884 |
| H | -5.03072 | 5.733232 | 5.852902 |
| C | -5.9419  | 4.084093 | 4.761525 |
| H | -6.91876 | 3.879574 | 4.29615  |
| H | -5.89924 | 3.462396 | 5.67308  |
| C | -4.83125 | 3.635083 | 3.795911 |
| H | -5.0562  | 4.070467 | 2.806684 |
| C | -3.44054 | 4.136236 | 4.197594 |
| H | -3.38223 | 5.233439 | 4.167675 |
| H | -2.69295 | 3.754108 | 3.489942 |
| H | -3.17083 | 3.792707 | 5.211338 |
| C | -4.86401 | 2.110516 | 3.662077 |
| H | -4.08295 | 1.749044 | 2.982183 |
| H | -5.83857 | 1.757708 | 3.290635 |
| H | -4.69564 | 1.631221 | 4.640172 |
| C | -5.891   | 6.529949 | 4.040292 |
| O | -6.65928 | 6.438072 | 3.081466 |
| N | -5.01555 | 7.556461 | 4.140448 |
| H | -4.35511 | 7.567606 | 4.906421 |
| C | -4.95455 | 8.596632 | 3.14999  |
| H | -5.94411 | 9.068465 | 3.035274 |
| C | -4.47999 | 8.117489 | 1.773498 |
| O | -3.88719 | 7.056467 | 1.603283 |
| N | -4.76682 | 8.987068 | 0.782269 |
| H | -5.12203 | 9.900761 | 1.037097 |
| C | -4.20452 | 8.817503 | -0.53849 |
| H | -4.53729 | 7.868658 | -0.97365 |
| C | -2.6737  | 8.861891 | -0.48805 |
| O | -2.0827  | 9.576165 | 0.306409 |
| N | -2.05717 | 8.061111 | -1.39065 |
| C | -0.61572 | 7.984758 | -1.41914 |
| C | -0.16534 | 7.439112 | -2.76891 |
| C | -0.04217 | 7.122868 | -0.2496  |
| O | -0.88458 | 6.721869 | -3.46879 |
| C | -0.56751 | 5.729162 | -0.23449 |

|   |          |          |          |
|---|----------|----------|----------|
| C | -0.04214 | 4.523244 | -0.65835 |
| N | -1.85539 | 5.435495 | 0.17957  |
| C | -2.07218 | 4.12166  | -0.01011 |
| N | -0.99519 | 3.528084 | -0.51396 |
| H | -2.59121 | 7.353901 | -1.89774 |
| H | -0.21705 | 9.000465 | -1.28072 |
| H | 1.054102 | 7.126293 | -0.30255 |
| H | -0.32142 | 7.649136 | 0.675463 |
| H | 0.952001 | 4.323385 | -1.05003 |
| H | -3.00746 | 3.626464 | 0.215099 |
| H | -2.55135 | 6.091578 | 0.553048 |
| N | 1.099991 | 7.772436 | -3.10898 |
| H | 1.722116 | 8.173406 | -2.39412 |
| C | 1.759144 | 7.092419 | -4.19815 |
| H | 1.090587 | 7.046548 | -5.06829 |
| C | 2.184898 | 5.693225 | -3.76121 |
| O | 2.698956 | 5.497718 | -2.65183 |
| N | 1.950948 | 4.681465 | -4.60675 |
| C | 2.244743 | 3.315851 | -4.20084 |
| C | 3.766159 | 3.139725 | -4.0286  |
| C | 1.673709 | 2.328727 | -5.22019 |
| O | 4.543849 | 3.485142 | -4.90054 |
| C | 1.469155 | 0.916073 | -4.65855 |
| C | 0.301475 | 0.792554 | -3.69514 |
| O | -0.59462 | -0.05815 | -3.91251 |
| O | 0.287028 | 1.576367 | -2.69039 |
| H | 1.599673 | 4.869872 | -5.53813 |
| H | 1.757671 | 3.162814 | -3.23272 |
| H | 0.706114 | 2.714248 | -5.58559 |
| H | 2.357247 | 2.276674 | -6.08186 |
| H | 2.383724 | 0.588642 | -4.14043 |
| H | 1.297622 | 0.216923 | -5.4876  |
| N | 4.110556 | 2.587391 | -2.83681 |
| H | 3.403209 | 2.512705 | -2.09281 |
| C | 5.473806 | 2.350518 | -2.41987 |
| H | 5.414834 | 1.828063 | -1.45159 |
| C | 6.255524 | 1.456532 | -3.41547 |
| H | 6.506839 | 2.042374 | -4.30623 |
| H | 7.176063 | 1.106336 | -2.92878 |
| C | 5.387664 | 0.30313  | -3.87799 |
| O | 5.282305 | -0.76657 | -3.06862 |
| O | 4.750398 | 0.313892 | -4.90523 |
| C | 6.272025 | 3.640333 | -2.1501  |
| O | 7.46064  | 3.582829 | -1.83337 |
| N | 5.602669 | 4.800455 | -2.29034 |
| H | 4.59662  | 4.795049 | -2.44737 |
| C | 6.30022  | 6.075979 | -2.40149 |



|   |          |          |          |
|---|----------|----------|----------|
| H | 7.323902 | 5.829294 | -2.72443 |
| C | 5.639907 | 6.979894 | -3.43202 |
| H | 6.264659 | 7.865347 | -3.61281 |
| H | 4.665135 | 7.334226 | -3.07578 |
| H | 5.511304 | 6.429348 | -4.37517 |
| C | 6.430394 | 6.74736  | -1.02062 |
| O | 5.868277 | 7.801816 | -0.73228 |
| N | 7.233648 | 6.067242 | -0.17588 |
| H | 7.517494 | 5.131085 | -0.47545 |
| C | 7.518366 | 6.503582 | 1.184744 |
| H | 7.886374 | 7.543646 | 1.126505 |
| C | 6.285295 | 6.523955 | 2.108173 |
| H | 5.667726 | 7.377842 | 1.802965 |
| H | 6.661931 | 6.715167 | 3.12269  |
| C | 5.438516 | 5.272782 | 2.100051 |
| C | 4.211735 | 5.260606 | 1.414438 |
| H | 3.904291 | 6.145158 | 0.850552 |
| C | 3.363432 | 4.153099 | 1.482851 |
| H | 2.391128 | 4.181357 | 0.989019 |
| C | 3.743585 | 3.027737 | 2.222843 |
| H | 3.044215 | 2.193955 | 2.322801 |
| C | 4.985449 | 3.004933 | 2.86804  |
| H | 5.303857 | 2.12463  | 3.431189 |
| C | 5.822814 | 4.122855 | 2.809421 |
| H | 6.774931 | 4.122833 | 3.340855 |
| C | 8.665242 | 5.65883  | 1.776858 |
| O | 8.713816 | 5.407848 | 2.970791 |
| N | 9.597139 | 5.236298 | 0.883502 |
| H | 9.479209 | 5.490799 | -0.0897  |
| C | 10.55602 | 4.183485 | 1.185811 |
| H | 10.71105 | 4.1902   | 2.272488 |
| C | 10.0627  | 2.816764 | 0.693947 |
| H | 9.895836 | 2.880209 | -0.39575 |
| H | 10.86872 | 2.076364 | 0.846377 |
| C | 8.774345 | 2.314512 | 1.364428 |
| H | 8.017318 | 3.114295 | 1.286261 |
| C | 8.202308 | 1.113152 | 0.611956 |
| H | 8.003515 | 1.367541 | -0.44038 |
| H | 8.896786 | 0.254884 | 0.632922 |
| H | 7.262432 | 0.788292 | 1.079059 |
| C | 8.968476 | 1.997014 | 2.850737 |
| H | 9.225213 | 2.89845  | 3.425997 |
| H | 8.050881 | 1.564359 | 3.277348 |
| H | 9.776704 | 1.256459 | 2.985426 |
| C | 7.082511 | -2.39986 | 5.564852 |
| H | 7.600206 | -2.32368 | 6.536225 |
| C | 6.084953 | -1.23236 | 5.430788 |

|   |          |          |          |
|---|----------|----------|----------|
| H | 5.210763 | -1.38773 | 6.083727 |
| H | 6.579632 | -0.30358 | 5.742257 |
| C | 5.613776 | -1.04536 | 3.989144 |
| O | 6.097464 | -0.11123 | 3.330119 |
| O | 4.769671 | -1.89098 | 3.510884 |
| C | 6.454102 | -3.7787  | 5.484775 |
| O | 6.773286 | -4.62314 | 4.647519 |
| N | 5.494689 | -4.02935 | 6.415156 |
| H | 5.293909 | -3.31461 | 7.103454 |
| C | 4.895375 | -5.33542 | 6.586001 |
| H | 5.672175 | -6.1125  | 6.666726 |
| C | 3.967227 | -5.8068  | 5.468007 |
| O | 3.512421 | -6.93503 | 5.491371 |
| N | 3.719924 | -4.92683 | 4.454862 |
| H | 4.166788 | -4.01195 | 4.432435 |
| C | 3.037025 | -5.40216 | 3.276384 |
| H | 2.236807 | -6.08767 | 3.591129 |
| C | 2.444746 | -4.25941 | 2.445107 |
| H | 1.89913  | -4.70256 | 1.603376 |
| H | 3.271713 | -3.64992 | 2.054855 |
| C | 1.490878 | -3.3725  | 3.217681 |
| O | 0.273337 | -3.63981 | 3.27375  |
| N | 2.032027 | -2.30724 | 3.807649 |
| H | 3.041486 | -2.11538 | 3.727671 |
| H | 1.441019 | -1.52598 | 4.101105 |
| C | 3.931871 | -6.21827 | 2.332496 |
| O | 3.403493 | -6.79159 | 1.379561 |
| N | 5.257449 | -6.20115 | 2.560479 |
| H | 5.625127 | -5.7215  | 3.386423 |
| C | 6.19352  | -6.9066  | 1.70614  |
| H | 5.670282 | -7.14457 | 0.769791 |
| C | 7.47145  | -6.08916 | 1.434615 |
| H | 8.020241 | -5.96134 | 2.37957  |
| H | 8.106242 | -6.68589 | 0.759546 |
| C | 7.20386  | -4.74026 | 0.832415 |
| C | 6.9014   | -4.5942  | -0.55244 |
| H | 6.893042 | -5.48116 | -1.19112 |
| C | 6.620317 | -3.36121 | -1.09162 |
| H | 6.381528 | -3.23612 | -2.14897 |
| C | 6.595227 | -2.18502 | -0.2447  |
| O | 6.22921  | -1.05085 | -0.68387 |
| H | 5.771775 | -0.754   | -2.19558 |
| C | 6.942992 | -2.34306 | 1.149315 |
| H | 6.957675 | -1.45084 | 1.777915 |
| C | 7.222521 | -3.5884  | 1.658135 |
| H | 7.438232 | -3.71734 | 2.719781 |
| C | -5.49105 | 5.602088 | -3.82221 |

|   |          |          |          |
|---|----------|----------|----------|
| C | -5.20592 | 5.514312 | -2.32972 |
| C | -5.07804 | 4.30554  | -4.55848 |
| O | -4.18755 | 6.009649 | -1.84397 |
| C | -3.79748 | 3.742977 | -4.03959 |
| C | -3.55369 | 2.569226 | -3.36223 |
| N | -2.59075 | 4.424942 | -4.02906 |
| C | -1.68628 | 3.680728 | -3.36798 |
| N | -2.2379  | 2.548431 | -2.94818 |
| H | -6.55386 | 5.816266 | -4.01405 |
| H | -5.02275 | 4.51018  | -5.64074 |
| H | -5.85126 | 3.533792 | -4.42738 |
| H | -4.2303  | 1.746208 | -3.14904 |
| H | -0.67435 | 4.017373 | -3.17384 |
| H | -2.399   | 5.400234 | -4.25852 |
| N | -6.10415 | 4.844336 | -1.5837  |
| H | -6.88369 | 4.346434 | -2.00821 |
| C | -5.98487 | 4.673854 | -0.15025 |
| H | -5.81169 | 5.634097 | 0.357001 |
| H | -5.12687 | 4.025331 | 0.103255 |
| C | -7.25944 | 3.980372 | 0.326218 |
| O | -7.82648 | 3.171143 | -0.40943 |
| N | -7.69299 | 4.303111 | 1.557037 |
| H | -7.25234 | 5.069824 | 2.082241 |
| C | -8.94489 | 3.772334 | 2.066421 |
| H | -9.71381 | 3.845932 | 1.27937  |
| C | -8.85455 | 2.319097 | 2.538235 |
| H | -8.52801 | 1.700135 | 1.686316 |
| H | -8.07538 | 2.245263 | 3.313418 |
| C | -10.1892 | 1.813818 | 3.084499 |
| H | -10.9568 | 1.838968 | 2.292564 |
| H | -10.5491 | 2.495835 | 3.876137 |
| C | -10.1494 | 0.392055 | 3.648128 |
| H | -11.1534 | 0.088075 | 3.980794 |
| H | -9.86107 | -0.33282 | 2.872207 |
| N | -9.24597 | 0.236126 | 4.786979 |
| H | -9.56332 | 0.609368 | 5.674172 |
| C | -7.98179 | -0.21862 | 4.739215 |
| N | -7.42998 | -0.63629 | 3.603822 |
| H | -7.89782 | -0.54723 | 2.714203 |
| H | -6.46656 | -1.01213 | 3.666547 |
| N | -7.24136 | -0.26512 | 5.854149 |
| H | -7.65746 | -0.11384 | 6.762801 |
| H | -6.29219 | -0.65955 | 5.76995  |
| C | -3.51141 | -3.80296 | -6.86966 |
| H | -3.59064 | -4.75594 | -7.40844 |
| H | -3.7785  | -3.00298 | -7.57987 |
| N | -2.14449 | -3.65935 | -6.40499 |

|    |          |          |          |
|----|----------|----------|----------|
| H  | -1.57988 | -4.53933 | -6.26096 |
| C  | -1.69818 | -2.56404 | -5.79601 |
| N  | -2.49162 | -1.48121 | -5.63941 |
| H  | -3.47092 | -1.51148 | -5.88083 |
| H  | -2.10831 | -0.65632 | -5.18274 |
| N  | -0.45601 | -2.49574 | -5.31772 |
| H  | 0.243645 | -3.25202 | -5.35357 |
| H  | -0.20401 | -1.63528 | -4.82837 |
| O  | -3.68728 | -0.22808 | -1.57862 |
| C  | -3.85015 | 0.631329 | -0.70829 |
| O  | -2.91647 | 1.446909 | -0.32833 |
| C  | -5.1923  | 0.855321 | -0.04716 |
| H  | -5.75433 | -0.08152 | -0.01365 |
| H  | -5.07802 | 1.273025 | 0.960567 |
| O  | -0.49324 | 0.23983  | -0.53024 |
| O  | -0.94822 | -1.1283  | 1.707675 |
| Fe | -1.27959 | 1.488329 | -1.4199  |
| C  | -0.40884 | -2.78996 | -1.77738 |
| N  | -1.60114 | -1.9805  | -2.18805 |
| H  | -2.06955 | -1.5894  | -1.35647 |
| H  | -1.33437 | -1.17524 | -2.79287 |
| H  | -2.30867 | -2.54143 | -2.67147 |
| C  | -0.85086 | -3.73203 | -0.63258 |
| O  | -1.72105 | -3.24507 | 0.164864 |
| O  | -0.32519 | -4.84954 | -0.58046 |
| C  | 0.727459 | -1.83864 | -1.35215 |
| C  | 1.702829 | -2.55668 | -0.41925 |
| C  | 3.047752 | -1.87088 | -0.19746 |
| C  | 2.947409 | -0.60251 | 0.636941 |
| N  | 4.26319  | -0.27278 | 1.249816 |
| H  | 4.296879 | 0.669046 | 1.659509 |
| H  | 4.502504 | -0.93929 | 2.036847 |
| H  | 5.039444 | -0.32747 | 0.562597 |
| H  | -9.13723 | -4.04503 | 0.033447 |
| H  | -4.25033 | 9.369661 | 3.493268 |
| H  | -4.55899 | 9.63896  | -1.17811 |
| H  | 2.662852 | 7.654446 | -4.47787 |
| H  | 11.51823 | 4.434237 | 0.712372 |
| H  | -6.79286 | 5.78232  | 5.794677 |
| H  | -9.25615 | 4.421835 | 2.898886 |
| H  | -4.90725 | 6.455763 | -4.19384 |
| H  | -5.7755  | 1.574379 | -0.64546 |
| H  | 7.854677 | -2.33326 | 4.786503 |
| H  | 6.487138 | -7.86661 | 2.16478  |
| H  | 4.324192 | -5.35028 | 7.524443 |
| H  | -3.33048 | -1.26503 | 6.42189  |
| H  | -4.20606 | -5.58879 | 4.118875 |

|   |          |          |          |
|---|----------|----------|----------|
| H | 4.738912 | -6.65479 | -2.5613  |
| H | 2.727159 | -10.4811 | -1.21222 |
| H | -3.56018 | -6.38264 | -5.33643 |
| H | -0.92165 | -0.54714 | 0.897161 |
| H | -1.10407 | -2.02694 | 1.325633 |
| H | 2.629639 | 0.252192 | 0.031727 |
| H | 2.238147 | -0.72984 | 1.464653 |
| H | 3.527683 | -1.63717 | -1.16203 |
| H | 3.717415 | -2.58283 | 0.313555 |
| H | 1.214975 | -2.69974 | 0.557285 |
| H | 1.897207 | -3.57387 | -0.79394 |
| H | 0.216603 | -0.83274 | -0.90421 |
| H | 1.268634 | -1.52173 | -2.26147 |
| H | -0.12364 | -3.40691 | -2.64123 |
| H | -4.23911 | -3.81618 | -6.03777 |
| O | 0.765792 | 1.799699 | 1.285444 |
| H | 0.3515   | 1.16124  | 0.642487 |
| H | 0.967541 | 1.254171 | 2.08151  |
| O | -1.80487 | 2.021118 | 2.154571 |
| H | -2.32225 | 1.720534 | 1.381209 |
| H | -0.90068 | 2.178476 | 1.794293 |
| O | 2.262554 | 2.148227 | -0.90086 |
| H | 1.526099 | 1.823223 | -1.4538  |
| H | 1.876101 | 2.241248 | -0.00187 |
| O | 0.755368 | 0.139699 | 3.416327 |
| H | 0.145456 | -0.39082 | 2.843969 |
| H | 0.157223 | 0.689021 | 3.979879 |
| O | -1.15853 | 1.620627 | 4.662207 |
| H | -1.56574 | 1.754585 | 3.764358 |
| H | -0.91309 | 2.508971 | 4.953673 |
| O | 3.091684 | 7.811461 | -1.13735 |
| H | 3.096775 | 6.904204 | -1.49912 |
| H | 4.034279 | 8.016024 | -0.96275 |

<sup>5</sup>IM1<sub>C,C3</sub>

|   |          |          |          |
|---|----------|----------|----------|
| C | 3.545973 | -5.13504 | -3.14943 |
| H | 3.680854 | -4.57731 | -2.21102 |
| C | 2.659221 | -4.3816  | -4.13969 |
| H | 2.547319 | -5.00665 | -5.03549 |
| H | 1.648367 | -4.26748 | -3.71905 |
| C | 3.179655 | -3.01353 | -4.56167 |
| H | 3.287941 | -2.32203 | -3.70987 |
| H | 4.191341 | -3.09355 | -4.9971  |
| C | 2.272289 | -2.36078 | -5.60128 |
| O | 1.269786 | -2.93327 | -6.04038 |
| N | 2.625466 | -1.1283  | -6.00815 |
| H | 3.434528 | -0.60736 | -5.64495 |
| H | 2.086044 | -0.71916 | -6.76337 |
| C | 3.007699 | -6.53803 | -2.87944 |
| O | 2.705812 | -7.29167 | -3.80921 |
| N | 2.912642 | -6.90693 | -1.58613 |
| H | 3.013258 | -6.22606 | -0.82905 |
| C | 2.574855 | -8.25946 | -1.16558 |
| H | 2.870525 | -8.3305  | -0.10805 |
| C | 1.104027 | -8.66179 | -1.31205 |
| H | 0.882548 | -8.78668 | -2.38236 |
| H | 0.999169 | -9.66101 | -0.8536  |
| C | 0.109452 | -7.68954 | -0.67839 |
| H | 0.059864 | -6.75574 | -1.2605  |
| H | 0.441265 | -7.40272 | 0.333791 |
| C | -1.29657 | -8.28366 | -0.59656 |
| H | -1.61615 | -8.61815 | -1.60105 |
| H | -1.28392 | -9.18125 | 0.050292 |
| N | -2.23008 | -7.30186 | -0.07395 |
| H | -1.88716 | -6.33477 | 0.060134 |
| C | -3.55051 | -7.44518 | -0.00702 |
| N | -4.16153 | -8.57148 | -0.46612 |
| H | -3.61898 | -9.41761 | -0.57837 |
| H | -5.1519  | -8.66191 | -0.24013 |
| N | -4.29762 | -6.45916 | 0.475319 |
| H | -3.80115 | -5.71854 | 0.999696 |
| H | -5.31366 | -6.58114 | 0.501781 |
| C | -4.3642  | -6.87495 | -4.64052 |
| H | -4.1732  | -7.87171 | -5.06952 |
| C | -3.30046 | -6.56264 | -3.56702 |
| H | -3.56946 | -5.63668 | -3.03432 |
| H | -3.28872 | -7.35746 | -2.80795 |
| C | -1.93494 | -6.41137 | -4.14504 |
| N | -1.58117 | -5.3075  | -4.89662 |
| C | -0.31966 | -5.49282 | -5.26376 |

|   |          |          |          |
|---|----------|----------|----------|
| H | 0.292313 | -4.79011 | -5.82732 |
| N | 0.152293 | -6.671   | -4.79109 |
| H | 1.133189 | -6.97996 | -4.77677 |
| C | -0.86111 | -7.2702  | -4.07973 |
| H | -0.73567 | -8.2366  | -3.60523 |
| C | -5.75819 | -6.79874 | -4.05722 |
| O | -6.51036 | -5.8457  | -4.25438 |
| N | -6.09785 | -7.83187 | -3.23905 |
| H | -5.39295 | -8.52189 | -3.00525 |
| C | -7.34575 | -7.85766 | -2.48248 |
| H | -8.12612 | -7.46147 | -3.1492  |
| C | -7.69852 | -9.27543 | -2.06346 |
| H | -8.64421 | -9.2887  | -1.50437 |
| H | -6.92574 | -9.70232 | -1.40644 |
| H | -7.80407 | -9.917   | -2.94997 |
| C | -7.21395 | -6.90292 | -1.27672 |
| O | -6.84976 | -7.31379 | -0.16657 |
| N | -7.47981 | -5.62338 | -1.5763  |
| H | -7.60278 | -5.43034 | -2.57232 |
| C | -7.40414 | -4.47333 | -0.68906 |
| H | -6.97309 | -4.78656 | 0.272411 |
| C | -6.58447 | -3.32934 | -1.31141 |
| H | -6.88274 | -3.26847 | -2.37541 |
| C | -6.92853 | -1.98773 | -0.65836 |
| H | -8.0053  | -1.76315 | -0.74173 |
| H | -6.6319  | -1.99652 | 0.400574 |
| H | -6.36664 | -1.18165 | -1.1471  |
| C | -5.08198 | -3.61674 | -1.24503 |
| H | -4.8369  | -4.58605 | -1.70047 |
| H | -4.74386 | -3.63119 | -0.19945 |
| H | -4.5138  | -2.83528 | -1.76864 |
| C | -2.59555 | 0.048077 | 5.900006 |
| H | -2.18874 | 1.068908 | 5.822815 |
| C | -1.44187 | -0.95966 | 5.974051 |
| H | -0.73596 | -0.73433 | 5.154256 |
| C | -0.69351 | -0.84938 | 7.297347 |
| H | 0.102868 | -1.60999 | 7.352928 |
| H | -1.3763  | -1.03399 | 8.140622 |
| H | -0.23145 | 0.142019 | 7.399055 |
| O | -1.98404 | -2.25901 | 5.796087 |
| H | -1.24868 | -2.86087 | 5.52369  |
| C | -3.53264 | -0.2034  | 4.740727 |
| O | -4.76662 | -0.17475 | 4.895556 |
| N | -2.98337 | -0.47075 | 3.538248 |
| H | -1.96755 | -0.61134 | 3.437894 |
| C | -3.7636  | -1.02868 | 2.450542 |
| H | -4.59772 | -0.37603 | 2.168928 |

|   |          |          |          |
|---|----------|----------|----------|
| H | -3.11264 | -1.11677 | 1.570221 |
| C | -4.31066 | -2.43715 | 2.719245 |
| O | -5.24727 | -2.86818 | 2.036326 |
| N | -3.69775 | -3.12407 | 3.690495 |
| H | -2.99001 | -2.67068 | 4.280769 |
| C | -3.93513 | -4.52889 | 3.9544   |
| H | -4.86495 | -4.81757 | 3.444703 |
| C | -2.75817 | -5.36391 | 3.445986 |
| H | -1.8454  | -5.11831 | 4.011626 |
| H | -2.97969 | -6.43263 | 3.603301 |
| O | -2.54374 | -5.17554 | 2.064314 |
| H | -2.15969 | -4.29523 | 1.83077  |
| C | -6.95219 | 5.096319 | 4.338319 |
| H | -6.1733  | 5.473564 | 5.017463 |
| C | -6.57099 | 3.73126  | 3.767321 |
| H | -7.42987 | 3.336602 | 3.201842 |
| H | -6.40431 | 3.03462  | 4.607223 |
| C | -5.33149 | 3.712022 | 2.856577 |
| H | -5.57718 | 4.291907 | 1.94986  |
| C | -4.11127 | 4.365566 | 3.513224 |
| H | -4.2303  | 5.456603 | 3.591205 |
| H | -3.19694 | 4.174657 | 2.934869 |
| H | -3.93501 | 3.956197 | 4.522316 |
| C | -5.03834 | 2.270155 | 2.443627 |
| H | -4.21721 | 2.197655 | 1.716285 |
| H | -5.92446 | 1.797147 | 1.991624 |
| H | -4.77418 | 1.673049 | 3.327006 |
| C | -7.24682 | 6.114372 | 3.253756 |
| O | -7.89864 | 5.838196 | 2.24674  |
| N | -6.78809 | 7.368254 | 3.481416 |
| H | -6.14982 | 7.517086 | 4.253084 |
| C | -6.91927 | 8.400386 | 2.491992 |
| H | -7.90536 | 8.304563 | 2.012267 |
| C | -5.85157 | 8.29735  | 1.394135 |
| O | -5.11923 | 7.315742 | 1.297994 |
| N | -5.82822 | 9.338293 | 0.541169 |
| H | -6.36716 | 10.16501 | 0.768385 |
| C | -4.86212 | 9.411974 | -0.53624 |
| H | -5.04387 | 8.613883 | -1.26671 |
| C | -3.43247 | 9.324701 | 0.00705  |
| O | -3.09021 | 9.924471 | 1.012833 |
| N | -2.59946 | 8.549735 | -0.73054 |
| C | -1.2225  | 8.386365 | -0.33138 |
| C | -0.41255 | 7.906019 | -1.53344 |
| C | -1.06452 | 7.432375 | 0.891932 |
| O | -0.93845 | 7.353936 | -2.50195 |
| C | -1.55504 | 6.047507 | 0.643594 |



|   |          |          |          |
|---|----------|----------|----------|
| C | -0.87927 | 4.854802 | 0.48371  |
| N | -2.89225 | 5.735736 | 0.471369 |
| C | -2.99314 | 4.419977 | 0.21019  |
| N | -1.79072 | 3.848938 | 0.213141 |
| H | -2.97315 | 7.938744 | -1.45766 |
| H | -0.84401 | 9.367497 | -0.00618 |
| H | -0.00712 | 7.394286 | 1.189268 |
| H | -1.62453 | 7.904504 | 1.713343 |
| H | 0.188138 | 4.663585 | 0.552473 |
| H | -3.92468 | 3.902349 | 0.005975 |
| H | -3.68513 | 6.387588 | 0.555394 |
| N | 0.917561 | 8.113446 | -1.44291 |
| H | 1.335165 | 8.369633 | -0.54134 |
| C | 1.819769 | 7.533599 | -2.40862 |
| H | 1.414774 | 7.673712 | -3.41974 |
| C | 2.063921 | 6.050946 | -2.12555 |
| O | 2.265314 | 5.632279 | -0.97978 |
| N | 2.027113 | 5.229006 | -3.18828 |
| C | 2.321448 | 3.815153 | -3.04722 |
| C | 3.841079 | 3.605509 | -3.02936 |
| C | 1.698099 | 3.024513 | -4.20595 |
| O | 4.562649 | 4.199695 | -3.8139  |
| C | 1.571009 | 1.519532 | -3.93574 |
| C | 0.410821 | 1.177968 | -3.02643 |
| O | -0.46185 | 0.36614  | -3.41012 |
| O | 0.370857 | 1.734988 | -1.87693 |
| H | 2.015084 | 5.62902  | -4.12027 |
| H | 1.889598 | 3.498829 | -2.09352 |
| H | 0.702342 | 3.44412  | -4.42144 |
| H | 2.319995 | 3.175039 | -5.10263 |
| H | 2.489801 | 1.135711 | -3.46771 |
| H | 1.450456 | 0.969974 | -4.87518 |
| N | 4.295931 | 2.699912 | -2.12566 |
| H | 3.675303 | 2.354104 | -1.38072 |
| C | 5.702046 | 2.33135  | -2.11012 |
| H | 5.848831 | 1.69981  | -1.22077 |
| C | 6.131968 | 1.561697 | -3.37465 |
| H | 6.326892 | 2.263234 | -4.19146 |
| H | 7.069465 | 1.023828 | -3.16469 |
| C | 5.086715 | 0.582282 | -3.8635  |
| O | 4.630277 | -0.3348  | -3.00885 |
| O | 4.6448   | 0.616209 | -4.99508 |
| C | 6.60475  | 3.569289 | -1.92716 |
| O | 7.67034  | 3.678285 | -2.50988 |
| N | 6.1447   | 4.480796 | -1.0244  |
| H | 5.187487 | 4.354157 | -0.71172 |
| C | 6.655864 | 5.849001 | -0.99742 |

|   |          |          |          |
|---|----------|----------|----------|
| H | 6.694814 | 6.233139 | -2.03035 |
| C | 5.734204 | 6.734745 | -0.15981 |
| H | 6.127569 | 7.759781 | -0.16207 |
| H | 5.700278 | 6.378161 | 0.883327 |
| H | 4.709357 | 6.74151  | -0.5606  |
| C | 8.100611 | 5.992741 | -0.48933 |
| O | 8.687669 | 7.044432 | -0.66807 |
| N | 8.624871 | 4.921578 | 0.159697 |
| H | 8.046487 | 4.098852 | 0.286696 |
| C | 9.997741 | 4.878443 | 0.621641 |
| H | 10.39641 | 5.893602 | 0.470142 |
| C | 10.09283 | 4.523764 | 2.118418 |
| H | 9.583287 | 5.315181 | 2.688454 |
| H | 11.15708 | 4.536836 | 2.385614 |
| C | 9.491393 | 3.176495 | 2.441452 |
| C | 8.121079 | 3.048792 | 2.726226 |
| H | 7.49832  | 3.947512 | 2.764796 |
| C | 7.549763 | 1.799319 | 2.983221 |
| H | 6.48775  | 1.691808 | 3.20669  |
| C | 8.353692 | 0.655894 | 2.969182 |
| H | 7.910179 | -0.31608 | 3.190448 |
| C | 9.718202 | 0.766254 | 2.689939 |
| H | 10.35165 | -0.12394 | 2.682392 |
| C | 10.2813  | 2.015069 | 2.420735 |
| H | 11.34129 | 2.104071 | 2.179925 |
| C | 10.88708 | 3.92778  | -0.2113  |
| O | 11.9599  | 3.542501 | 0.237242 |
| N | 10.40252 | 3.58654  | -1.42555 |
| H | 9.485113 | 3.918603 | -1.71466 |
| C | 11.06946 | 2.64666  | -2.30622 |
| H | 12.07477 | 2.478363 | -1.89866 |
| C | 10.29215 | 1.332279 | -2.44536 |
| H | 9.311833 | 1.563973 | -2.89568 |
| H | 10.82595 | 0.687316 | -3.16665 |
| C | 10.07672 | 0.559701 | -1.13447 |
| H | 9.568433 | 1.236405 | -0.42413 |
| C | 9.154681 | -0.64186 | -1.36337 |
| H | 8.187103 | -0.33242 | -1.79017 |
| H | 9.6102   | -1.36838 | -2.05795 |
| H | 8.946947 | -1.16807 | -0.41746 |
| C | 11.3996  | 0.123165 | -0.49738 |
| H | 12.01029 | 0.988629 | -0.2034  |
| H | 11.21966 | -0.47821 | 0.407161 |
| H | 11.98655 | -0.49513 | -1.19838 |
| C | 6.848617 | -2.51266 | 5.260167 |
| H | 7.48659  | -2.45955 | 6.158667 |
| C | 5.829549 | -1.35827 | 5.30245  |

|   |          |          |          |
|---|----------|----------|----------|
| H | 5.123023 | -1.50114 | 6.138395 |
| H | 6.361695 | -0.41508 | 5.482485 |
| C | 5.024589 | -1.20813 | 4.008101 |
| O | 5.127235 | -0.165   | 3.352059 |
| O | 4.285932 | -2.2062  | 3.654643 |
| C | 6.242027 | -3.904   | 5.196618 |
| O | 6.482687 | -4.70319 | 4.291011 |
| N | 5.398297 | -4.21828 | 6.213268 |
| H | 5.24469  | -3.53609 | 6.944915 |
| C | 4.768575 | -5.51578 | 6.329943 |
| H | 5.517214 | -6.31676 | 6.225061 |
| C | 3.680952 | -5.83029 | 5.30019  |
| O | 3.135578 | -6.91858 | 5.305318 |
| N | 3.415796 | -4.85426 | 4.386202 |
| H | 3.913511 | -3.95868 | 4.381531 |
| C | 2.552244 | -5.12739 | 3.267534 |
| H | 1.947223 | -6.00466 | 3.548856 |
| C | 1.62041  | -3.94757 | 2.930975 |
| H | 0.823475 | -4.29329 | 2.262819 |
| H | 2.202067 | -3.17716 | 2.416119 |
| C | 0.970564 | -3.32845 | 4.155608 |
| O | -0.13452 | -3.70902 | 4.557489 |
| N | 1.675119 | -2.34986 | 4.745322 |
| H | 2.612291 | -2.10534 | 4.403098 |
| H | 1.306246 | -1.90028 | 5.575095 |
| C | 3.327942 | -5.56249 | 2.009714 |
| O | 2.730903 | -5.66802 | 0.932757 |
| N | 4.634769 | -5.83985 | 2.174816 |
| H | 5.072375 | -5.63883 | 3.07658  |
| C | 5.456803 | -6.46473 | 1.156462 |
| H | 4.89131  | -6.4646  | 0.216152 |
| C | 6.820275 | -5.7685  | 0.9624   |
| H | 7.371692 | -5.78595 | 1.914057 |
| H | 7.3889   | -6.36131 | 0.228329 |
| C | 6.668211 | -4.35694 | 0.486807 |
| C | 6.423935 | -4.07022 | -0.88627 |
| H | 6.444011 | -4.88857 | -1.61039 |
| C | 6.140271 | -2.79306 | -1.3042  |
| H | 5.920315 | -2.56569 | -2.34843 |
| C | 6.061646 | -1.71748 | -0.33529 |
| O | 5.613591 | -0.56983 | -0.63944 |
| H | 5.071273 | -0.33048 | -2.10523 |
| C | 6.418926 | -2.0052  | 1.03347  |
| H | 6.402954 | -1.17063 | 1.735134 |
| C | 6.685956 | -3.29369 | 1.424899 |
| H | 6.880332 | -3.53816 | 2.469877 |
| C | -5.08431 | 6.166689 | -4.2383  |

|   |          |          |          |
|---|----------|----------|----------|
| C | -5.32497 | 6.087781 | -2.73729 |
| C | -4.45315 | 4.877759 | -4.80889 |
| O | -4.56673 | 6.642085 | -1.93719 |
| C | -3.32578 | 4.355579 | -3.98015 |
| C | -3.13132 | 3.115508 | -3.40948 |
| N | -2.24944 | 5.114617 | -3.55615 |
| C | -1.47351 | 4.347229 | -2.76426 |
| N | -1.98056 | 3.127823 | -2.64924 |
| H | -6.02327 | 6.37903  | -4.7729  |
| H | -4.12543 | 5.077759 | -5.84336 |
| H | -5.20911 | 4.080788 | -4.87546 |
| H | -3.75273 | 2.22967  | -3.508   |
| H | -0.59275 | 4.731375 | -2.2603  |
| H | -2.09506 | 6.120975 | -3.62539 |
| N | -6.38614 | 5.362349 | -2.33784 |
| H | -6.94867 | 4.821488 | -2.99466 |
| C | -6.75125 | 5.160754 | -0.95634 |
| H | -7.13817 | 6.078912 | -0.48506 |
| H | -5.87642 | 4.868453 | -0.35469 |
| C | -7.80335 | 4.048119 | -0.90888 |
| O | -8.07303 | 3.409786 | -1.92243 |
| N | -8.36267 | 3.834387 | 0.299039 |
| H | -8.1676  | 4.493057 | 1.062822 |
| C | -9.40038 | 2.83738  | 0.487275 |
| H | -9.8311  | 2.610802 | -0.49888 |
| C | -8.89017 | 1.548187 | 1.139763 |
| H | -8.09076 | 1.117763 | 0.515006 |
| H | -8.42706 | 1.801444 | 2.107946 |
| C | -9.99555 | 0.513946 | 1.349143 |
| H | -10.3823 | 0.168684 | 0.375679 |
| H | -10.8557 | 0.977775 | 1.866279 |
| C | -9.5443  | -0.71515 | 2.141788 |
| H | -10.3482 | -1.46584 | 2.185708 |
| H | -8.69127 | -1.19173 | 1.641487 |
| N | -9.15299 | -0.37441 | 3.510913 |
| H | -9.87695 | 0.019888 | 4.101631 |
| C | -7.89546 | -0.32146 | 3.978265 |
| N | -6.88113 | -0.90186 | 3.356988 |
| H | -6.96276 | -1.64239 | 2.666119 |
| H | -5.95305 | -0.75203 | 3.790206 |
| N | -7.63108 | 0.338508 | 5.120347 |
| H | -8.29475 | 0.987204 | 5.520356 |
| H | -6.67325 | 0.320068 | 5.474538 |
| C | -4.58364 | -2.94698 | -4.83517 |
| H | -4.95173 | -3.97757 | -4.9044  |
| H | -5.01252 | -2.36393 | -5.66634 |
| N | -3.13092 | -2.94028 | -4.88282 |

|    |          |          |          |
|----|----------|----------|----------|
| H  | -2.59777 | -3.83963 | -4.99711 |
| C  | -2.41505 | -1.82694 | -4.76519 |
| N  | -3.00469 | -0.66183 | -4.40825 |
| H  | -3.79366 | -0.68409 | -3.76025 |
| H  | -2.36306 | 0.109018 | -4.23631 |
| N  | -1.10047 | -1.81832 | -5.00345 |
| H  | -0.58407 | -2.55879 | -5.47502 |
| H  | -0.57523 | -0.99706 | -4.70045 |
| O  | -4.15356 | -0.29086 | -1.83623 |
| C  | -4.27806 | 0.789748 | -1.21316 |
| O  | -3.35476 | 1.311138 | -0.50464 |
| C  | -5.58201 | 1.556561 | -1.28165 |
| H  | -5.95304 | 1.744729 | -0.26486 |
| H  | -5.40125 | 2.539701 | -1.73967 |
| O  | -0.61266 | 0.601853 | 0.415061 |
| O  | -0.50892 | -1.05294 | 2.417758 |
| Fe | -1.48297 | 2.028863 | -0.82622 |
| C  | -1.01301 | -2.59164 | -1.50844 |
| N  | -1.59957 | -1.22505 | -1.39628 |
| H  | -1.30363 | -0.73435 | -0.51682 |
| H  | -1.2331  | -0.62117 | -2.16661 |
| H  | -2.64343 | -1.14347 | -1.46339 |
| C  | -1.43667 | -3.50701 | -0.33882 |
| O  | -1.58648 | -2.96901 | 0.802752 |
| O  | -1.53649 | -4.70583 | -0.63079 |
| C  | 0.480063 | -2.47915 | -1.60669 |
| C  | 1.433101 | -3.31026 | -0.81988 |
| C  | 2.69342  | -2.55581 | -0.36717 |
| C  | 2.314895 | -1.34595 | 0.481865 |
| N  | 3.393416 | -0.8373  | 1.361231 |
| H  | 3.015806 | -0.11814 | 2.011966 |
| H  | 3.782268 | -1.54288 | 2.042118 |
| H  | 4.175975 | -0.42317 | 0.835595 |
| H  | -8.43187 | -4.12277 | -0.48545 |
| H  | -6.87064 | 9.388115 | 2.974996 |
| H  | -4.9771  | 10.38469 | -1.03528 |
| H  | 2.788888 | 8.052546 | -2.34824 |
| H  | 11.18885 | 3.104844 | -3.30196 |
| H  | -7.87298 | 5.003    | 4.940069 |
| H  | -10.1981 | 3.277605 | 1.108683 |
| H  | -4.41427 | 7.023254 | -4.39715 |
| H  | -6.35086 | 1.037664 | -1.86436 |
| H  | 7.517887 | -2.40433 | 4.396125 |
| H  | 5.643959 | -7.51814 | 1.427144 |
| H  | 4.324746 | -5.61749 | 7.329633 |
| H  | -3.20976 | -0.00488 | 6.809505 |
| H  | -4.06464 | -4.68067 | 5.038495 |

|   |          |          |          |
|---|----------|----------|----------|
| H | 4.552265 | -5.27124 | -3.58424 |
| H | 3.192339 | -8.96846 | -1.73865 |
| H | -4.30238 | -6.14705 | -5.45954 |
| H | -0.61059 | -0.37394 | 1.679201 |
| H | -0.78632 | -1.88164 | 1.960637 |
| H | 2.020133 | -0.50403 | -0.1538  |
| H | 1.465881 | -1.58505 | 1.133459 |
| H | 3.285231 | -2.23044 | -1.23674 |
| H | 3.322752 | -3.25221 | 0.207389 |
| H | 0.942805 | -3.74187 | 0.062405 |
| H | 1.741842 | -4.1906  | -1.40992 |
| H | 0.285132 | 0.466588 | 0.080898 |
| H | 0.869023 | -1.85739 | -2.42122 |
| H | -1.41848 | -3.04141 | -2.42998 |
| H | -4.96589 | -2.53545 | -3.88823 |
| O | 0.695337 | 2.479734 | 1.870764 |
| H | 0.094072 | 1.901111 | 1.335609 |
| H | 1.166093 | 1.791098 | 2.403305 |
| O | -1.28669 | 2.385251 | 3.750881 |
| H | -1.92675 | 1.798628 | 3.320573 |
| H | -0.67025 | 2.660867 | 3.030293 |
| O | 2.453326 | 1.79943  | -0.18722 |
| H | 1.722024 | 1.795426 | -0.84706 |
| H | 2.061501 | 2.301099 | 0.560128 |
| O | 1.703213 | 0.334005 | 3.182624 |
| H | 0.967288 | -0.30972 | 3.047427 |
| H | 1.561074 | 0.684473 | 4.096061 |
| O | 0.67117  | 1.441295 | 5.377733 |
| H | -0.10346 | 1.788504 | 4.865791 |
| H | 1.030212 | 2.206073 | 5.847648 |
| O | 2.32269  | 7.653921 | 0.86254  |
| H | 2.417845 | 6.804204 | 0.37782  |
| H | 3.125163 | 7.77116  | 1.386157 |

<sup>5</sup>TS2<sub>C,C3</sub>

|   |          |          |          |
|---|----------|----------|----------|
| C | 2.046169 | -6.68768 | -1.53975 |
| H | 1.868015 | -6.31552 | -0.52047 |
| C | 1.728633 | -5.60979 | -2.564   |
| H | 2.003102 | -5.95619 | -3.5719  |
| H | 0.648683 | -5.41574 | -2.57563 |
| C | 2.431293 | -4.29694 | -2.25543 |
| H | 2.089779 | -3.96373 | -1.26252 |
| H | 3.521476 | -4.41546 | -2.18563 |
| C | 2.072111 | -3.2176  | -3.26052 |
| O | 0.901398 | -3.1189  | -3.68105 |
| N | 3.048542 | -2.3908  | -3.62354 |
| H | 3.983841 | -2.33656 | -3.18409 |
| H | 2.88207  | -1.62214 | -4.26698 |
| C | 1.231451 | -7.95275 | -1.7506  |
| O | 0.83166  | -8.3106  | -2.87129 |
| N | 0.974907 | -8.65012 | -0.63428 |
| H | 1.241004 | -8.22769 | 0.264819 |
| C | 0.16324  | -9.85384 | -0.61372 |
| H | 0.193969 | -10.2349 | 0.417875 |
| C | -1.29136 | -9.63105 | -1.05372 |
| H | -1.30581 | -9.49794 | -2.14674 |
| H | -1.85929 | -10.5518 | -0.83465 |
| C | -1.96206 | -8.42614 | -0.39485 |
| H | -1.39947 | -7.50817 | -0.63267 |
| H | -1.93458 | -8.51376 | 0.704961 |
| C | -3.40533 | -8.25861 | -0.86466 |
| H | -3.44178 | -8.3384  | -1.96638 |
| H | -4.03029 | -9.07936 | -0.46456 |
| N | -3.93487 | -6.96525 | -0.46066 |
| H | -3.41866 | -6.37821 | 0.220536 |
| C | -5.03976 | -6.40738 | -0.95122 |
| N | -5.80067 | -7.05    | -1.86403 |
| H | -5.69913 | -8.04877 | -1.97962 |
| H | -6.68553 | -6.59786 | -2.11586 |
| N | -5.38923 | -5.17233 | -0.58468 |
| H | -4.86489 | -4.69392 | 0.150187 |
| H | -6.29886 | -4.81711 | -0.87354 |
| C | -4.82791 | -5.45184 | -5.13488 |
| H | -4.89726 | -6.54449 | -5.02491 |
| C | -3.7918  | -4.88811 | -4.14314 |
| H | -3.80492 | -3.79171 | -4.22031 |
| H | -4.10259 | -5.12938 | -3.11704 |
| C | -2.42206 | -5.42493 | -4.40301 |
| N | -1.63992 | -4.98452 | -5.45546 |
| C | -0.54445 | -5.73511 | -5.44146 |

|   |          |          |          |
|---|----------|----------|----------|
| H | 0.302911 | -5.6329  | -6.11665 |
| N | -0.59292 | -6.64888 | -4.44898 |
| H | 0.139359 | -7.3011  | -4.10143 |
| C | -1.76917 | -6.45985 | -3.76861 |
| H | -2.02357 | -7.05215 | -2.89822 |
| C | -6.17111 | -4.78644 | -4.93888 |
| O | -6.29456 | -3.56414 | -4.8915  |
| N | -7.24741 | -5.60127 | -4.77524 |
| H | -7.11798 | -6.60533 | -4.76385 |
| C | -8.52419 | -5.04796 | -4.36421 |
| H | -8.80042 | -4.25346 | -5.07534 |
| C | -9.60238 | -6.1285  | -4.33906 |
| H | -10.5715 | -5.69622 | -4.05243 |
| H | -9.35162 | -6.91069 | -3.60593 |
| H | -9.71027 | -6.58729 | -5.33298 |
| C | -8.35124 | -4.43006 | -2.96602 |
| O | -7.82605 | -5.08947 | -2.06217 |
| N | -8.82564 | -3.18751 | -2.7978  |
| H | -9.12646 | -2.69159 | -3.62992 |
| C | -8.69229 | -2.42524 | -1.56729 |
| H | -8.35772 | -3.12392 | -0.78766 |
| C | -7.70789 | -1.24805 | -1.67831 |
| H | -8.08213 | -0.57608 | -2.47454 |
| C | -7.72137 | -0.47646 | -0.35444 |
| H | -8.74513 | -0.14669 | -0.1026  |
| H | -7.32958 | -1.12814 | 0.44354  |
| H | -7.08723 | 0.419161 | -0.41109 |
| C | -6.29346 | -1.70687 | -2.04707 |
| H | -6.2915  | -2.29128 | -2.97815 |
| H | -5.86877 | -2.31617 | -1.2348  |
| H | -5.62657 | -0.84549 | -2.2025  |
| C | -3.64627 | -0.20743 | 5.661771 |
| H | -3.344   | 0.839097 | 5.822326 |
| C | -2.38707 | -1.0781  | 5.639262 |
| H | -1.68667 | -0.64246 | 4.907028 |
| C | -1.6901  | -1.09081 | 6.994485 |
| H | -0.78685 | -1.71888 | 6.949692 |
| H | -2.35468 | -1.50859 | 7.766472 |
| H | -1.38735 | -0.07464 | 7.291095 |
| O | -2.76111 | -2.38295 | 5.233691 |
| H | -1.94676 | -2.89284 | 4.981322 |
| C | -4.47833 | -0.28044 | 4.403257 |
| O | -5.72494 | -0.19943 | 4.455166 |
| N | -3.84285 | -0.44944 | 3.236758 |
| H | -2.81816 | -0.54529 | 3.198624 |
| C | -4.51653 | -0.89637 | 2.040665 |
| H | -5.39424 | -0.28028 | 1.805417 |



|   |          |          |          |
|---|----------|----------|----------|
| H | -3.81964 | -0.79904 | 1.196865 |
| C | -4.94975 | -2.37217 | 2.069953 |
| O | -5.68591 | -2.79945 | 1.175718 |
| N | -4.45786 | -3.09836 | 3.082364 |
| H | -3.82906 | -2.67397 | 3.779421 |
| C | -4.64529 | -4.53055 | 3.216327 |
| H | -5.54302 | -4.81713 | 2.649778 |
| C | -3.42752 | -5.29532 | 2.698184 |
| H | -2.52353 | -5.01831 | 3.266139 |
| H | -3.59564 | -6.37679 | 2.837698 |
| O | -3.23284 | -5.05641 | 1.315712 |
| H | -2.69783 | -4.22952 | 1.154785 |
| C | -6.34119 | 5.830365 | 4.631459 |
| H | -5.57684 | 5.861625 | 5.422177 |
| C | -6.36989 | 4.464754 | 3.944132 |
| H | -7.27686 | 4.403099 | 3.325377 |
| H | -6.46731 | 3.68047  | 4.714831 |
| C | -5.15539 | 4.155575 | 3.054934 |
| H | -5.15977 | 4.881415 | 2.225055 |
| C | -3.82443 | 4.331681 | 3.790763 |
| H | -3.65701 | 5.38021  | 4.075792 |
| H | -2.99122 | 4.035259 | 3.139045 |
| H | -3.78306 | 3.702832 | 4.69543  |
| C | -5.30157 | 2.754882 | 2.459775 |
| H | -4.4379  | 2.495075 | 1.835665 |
| H | -6.21015 | 2.682114 | 1.844462 |
| H | -5.37585 | 1.995254 | 3.251399 |
| C | -6.1227  | 6.958575 | 3.64227  |
| O | -6.724   | 7.03002  | 2.569338 |
| N | -5.23179 | 7.905377 | 4.014114 |
| H | -4.70273 | 7.777534 | 4.866891 |
| C | -4.92286 | 9.017644 | 3.160264 |
| H | -5.85549 | 9.491761 | 2.815907 |
| C | -4.09111 | 8.634887 | 1.929143 |
| O | -3.56612 | 7.532001 | 1.794568 |
| N | -3.99487 | 9.632258 | 1.027207 |
| H | -4.35753 | 10.54339 | 1.281407 |
| C | -3.09086 | 9.546296 | -0.09796 |
| H | -3.4105  | 8.759213 | -0.79105 |
| C | -1.66035 | 9.280405 | 0.378118 |
| O | -1.21368 | 9.787633 | 1.393616 |
| N | -0.94818 | 8.452852 | -0.42591 |
| C | 0.418516 | 8.129492 | -0.1005  |
| C | 1.129708 | 7.659093 | -1.36606 |
| C | 0.520034 | 7.083721 | 1.052789 |
| O | 0.507822 | 7.220302 | -2.33529 |
| C | -0.17631 | 5.793037 | 0.77941  |

|   |          |          |          |
|---|----------|----------|----------|
| C | 0.307171 | 4.526037 | 0.513591 |
| N | -1.55419 | 5.670173 | 0.72462  |
| C | -1.85946 | 4.394968 | 0.42675  |
| N | -0.75478 | 3.657177 | 0.302124 |
| H | -1.412   | 7.921848 | -1.1634  |
| H | 0.905372 | 9.041986 | 0.275287 |
| H | 1.577696 | 6.89206  | 1.281471 |
| H | 0.076619 | 7.572173 | 1.93416  |
| H | 1.342578 | 4.214672 | 0.40923  |
| H | -2.87275 | 4.028419 | 0.293739 |
| H | -2.24534 | 6.418413 | 0.885554 |
| N | 2.475065 | 7.731985 | -1.33205 |
| H | 2.954092 | 7.898522 | -0.43891 |
| C | 3.260292 | 7.068807 | -2.3458  |
| H | 2.859444 | 7.302758 | -3.34084 |
| C | 3.276493 | 5.557267 | -2.11442 |
| O | 3.386801 | 5.102577 | -0.95919 |
| N | 3.146882 | 4.786677 | -3.19312 |
| C | 3.1807   | 3.328077 | -3.13674 |
| C | 4.646436 | 2.883081 | -3.21777 |
| C | 2.349926 | 2.749045 | -4.28954 |
| O | 5.350131 | 3.247473 | -4.14358 |
| C | 1.898178 | 1.300153 | -4.06675 |
| C | 0.881906 | 1.156516 | -2.96824 |
| O | -0.15152 | 0.442943 | -3.12487 |
| O | 1.067511 | 1.775311 | -1.86857 |
| H | 3.189073 | 5.221879 | -4.10968 |
| H | 2.736143 | 3.037388 | -2.18155 |
| H | 1.46753  | 3.393052 | -4.43874 |
| H | 2.955348 | 2.794106 | -5.20815 |
| H | 2.784031 | 0.678201 | -3.83377 |
| H | 1.47009  | 0.891365 | -4.992   |
| N | 5.075653 | 2.128717 | -2.17794 |
| H | 4.468203 | 1.999454 | -1.3709  |
| C | 6.429852 | 1.588826 | -2.16139 |
| H | 6.561254 | 1.102179 | -1.18049 |
| C | 6.67402  | 0.557503 | -3.27541 |
| H | 6.794387 | 1.084533 | -4.22785 |
| H | 7.598549 | 0.013737 | -3.04527 |
| C | 5.482219 | -0.39415 | -3.37922 |
| O | 5.440386 | -1.38852 | -2.56526 |
| O | 4.588271 | -0.12549 | -4.19926 |
| C | 7.459944 | 2.736508 | -2.22244 |
| O | 8.510395 | 2.643026 | -2.83088 |
| N | 7.118269 | 3.831503 | -1.48002 |
| H | 6.185349 | 3.836606 | -1.08469 |
| C | 7.798896 | 5.112392 | -1.60753 |

|   |          |          |          |
|---|----------|----------|----------|
| H | 7.839747 | 5.405352 | -2.66958 |
| C | 7.049848 | 6.172416 | -0.7997  |
| H | 7.55043  | 7.142371 | -0.91878 |
| H | 7.054674 | 5.906066 | 0.270578 |
| H | 6.002397 | 6.265666 | -1.12573 |
| C | 9.268386 | 5.090451 | -1.1446  |
| O | 10.02723 | 5.982569 | -1.47617 |
| N | 9.57988  | 4.059068 | -0.32715 |
| H | 8.836569 | 3.41558  | -0.08049 |
| C | 10.8744  | 3.828543 | 0.269902 |
| H | 11.50032 | 4.698321 | 0.016066 |
| C | 10.7493  | 3.703747 | 1.803862 |
| H | 10.59062 | 4.706448 | 2.227031 |
| H | 11.70587 | 3.313667 | 2.175975 |
| C | 9.602138 | 2.798064 | 2.183781 |
| C | 8.352429 | 3.339393 | 2.5255   |
| H | 8.245074 | 4.426486 | 2.586902 |
| C | 7.260716 | 2.511629 | 2.804122 |
| H | 6.301994 | 2.95274  | 3.092817 |
| C | 7.399479 | 1.121833 | 2.74078  |
| H | 6.582384 | 0.458792 | 3.030622 |
| C | 8.634536 | 0.57319  | 2.375491 |
| H | 8.749442 | -0.51213 | 2.32119  |
| C | 9.725986 | 1.400308 | 2.101847 |
| H | 10.68908 | 0.967453 | 1.827067 |
| C | 11.59443 | 2.591201 | -0.31607 |
| O | 12.52035 | 2.07841  | 0.301471 |
| N | 11.14952 | 2.16715  | -1.51832 |
| H | 10.34616 | 2.622226 | -1.94662 |
| C | 11.75042 | 1.055072 | -2.23467 |
| H | 12.65073 | 0.768168 | -1.67625 |
| C | 10.80378 | -0.13509 | -2.41628 |
| H | 9.961258 | 0.180281 | -3.05553 |
| H | 11.35016 | -0.90984 | -2.98428 |
| C | 10.24552 | -0.75836 | -1.12652 |
| H | 9.609705 | 0.002336 | -0.63557 |
| C | 9.364484 | -1.96665 | -1.46033 |
| H | 8.538299 | -1.70527 | -2.13994 |
| H | 9.960193 | -2.75546 | -1.95051 |
| H | 8.91776  | -2.39753 | -0.55277 |
| C | 11.3454  | -1.15679 | -0.13625 |
| H | 11.95005 | -0.29718 | 0.186279 |
| H | 10.90707 | -1.62018 | 0.762759 |
| H | 12.02585 | -1.8991  | -0.58848 |
| C | 5.383873 | -3.61999 | 5.461015 |
| H | 5.505055 | -3.03998 | 6.388681 |
| C | 4.246243 | -3.05525 | 4.601784 |

|   |          |          |          |
|---|----------|----------|----------|
| H | 4.004515 | -3.78807 | 3.816144 |
| H | 3.336213 | -2.92837 | 5.209144 |
| C | 4.485974 | -1.74652 | 3.852511 |
| O | 5.582197 | -1.19344 | 3.885313 |
| O | 3.466285 | -1.35246 | 3.162408 |
| C | 4.990319 | -5.06257 | 5.714258 |
| O | 5.253491 | -5.96627 | 4.924506 |
| N | 4.123489 | -5.27211 | 6.746871 |
| H | 3.95806  | -4.52984 | 7.415492 |
| C | 3.387093 | -6.51626 | 6.852356 |
| H | 4.066599 | -7.38031 | 6.88163  |
| C | 2.428848 | -6.78443 | 5.678336 |
| O | 1.98237  | -7.89496 | 5.470299 |
| N | 2.140704 | -5.70998 | 4.885412 |
| H | 2.536298 | -4.80912 | 5.115446 |
| C | 1.398346 | -5.86154 | 3.653476 |
| H | 0.431998 | -6.34522 | 3.855361 |
| C | 1.162027 | -4.50411 | 2.973284 |
| H | 0.557183 | -4.69124 | 2.073071 |
| H | 2.12312  | -4.07735 | 2.651783 |
| C | 0.409499 | -3.51285 | 3.838121 |
| O | -0.73951 | -3.77061 | 4.232181 |
| N | 1.059086 | -2.38202 | 4.141526 |
| H | 1.959961 | -2.08572 | 3.71085  |
| H | 0.574178 | -1.65001 | 4.650776 |
| C | 2.095719 | -6.75437 | 2.611844 |
| O | 1.397822 | -7.26334 | 1.731207 |
| N | 3.434384 | -6.83116 | 2.654722 |
| H | 3.93852  | -6.49039 | 3.476056 |
| C | 4.196762 | -7.59354 | 1.675    |
| H | 3.686553 | -7.49993 | 0.706786 |
| C | 5.651034 | -7.11876 | 1.567338 |
| H | 6.133183 | -7.22912 | 2.5512   |
| H | 6.165023 | -7.81821 | 0.887908 |
| C | 5.83716  | -5.69886 | 1.076436 |
| C | 5.726751 | -5.36159 | -0.2816  |
| H | 5.511739 | -6.14433 | -1.01576 |
| C | 5.910501 | -4.05054 | -0.72953 |
| H | 5.842778 | -3.80297 | -1.79028 |
| C | 6.206257 | -3.03103 | 0.190575 |
| O | 6.343651 | -1.73167 | -0.1813  |
| H | 6.126827 | -1.60541 | -1.16316 |
| C | 6.345435 | -3.35503 | 1.546642 |
| H | 6.597236 | -2.57041 | 2.261513 |
| C | 6.159607 | -4.67032 | 1.973697 |
| H | 6.27289  | -4.91905 | 3.029549 |
| C | -3.91623 | 6.758855 | -3.83491 |

|   |          |          |          |
|---|----------|----------|----------|
| C | -4.08952 | 6.495183 | -2.34603 |
| C | -3.40968 | 5.518758 | -4.61035 |
| O | -3.19981 | 6.776727 | -1.53796 |
| C | -2.36055 | 4.763544 | -3.86562 |
| C | -2.39149 | 3.489518 | -3.34201 |
| N | -1.169   | 5.304399 | -3.42227 |
| C | -0.54593 | 4.387083 | -2.65467 |
| N | -1.26262 | 3.2755   | -2.57784 |
| H | -4.85626 | 7.11515  | -4.28378 |
| H | -3.05052 | 5.845927 | -5.60023 |
| H | -4.24266 | 4.824355 | -4.79661 |
| H | -3.14502 | 2.721711 | -3.48228 |
| H | 0.398537 | 4.578373 | -2.1578  |
| H | -0.82748 | 6.263488 | -3.47583 |
| N | -5.25143 | 5.935472 | -1.95516 |
| H | -5.93464 | 5.594696 | -2.62865 |
| C | -5.58448 | 5.692593 | -0.56858 |
| H | -5.58098 | 6.622517 | 0.020155 |
| H | -4.84105 | 5.029302 | -0.09273 |
| C | -6.94843 | 5.000152 | -0.52452 |
| O | -7.33294 | 4.330621 | -1.48013 |
| N | -7.65397 | 5.175467 | 0.609808 |
| H | -7.31353 | 5.828309 | 1.326721 |
| C | -8.99266 | 4.631637 | 0.758066 |
| H | -9.49766 | 4.670654 | -0.21967 |
| C | -9.02472 | 3.194525 | 1.290778 |
| H | -8.52345 | 2.532313 | 0.565704 |
| H | -8.43646 | 3.151945 | 2.22004  |
| C | -10.4469 | 2.709285 | 1.568645 |
| H | -11.024  | 2.645376 | 0.630714 |
| H | -10.974  | 3.451216 | 2.195513 |
| C | -10.5263 | 1.346142 | 2.262737 |
| H | -11.5776 | 1.05572  | 2.408198 |
| H | -10.0847 | 0.559576 | 1.634575 |
| N | -9.8758  | 1.319874 | 3.572603 |
| H | -10.3554 | 1.805172 | 4.322338 |
| C | -8.64287 | 0.858354 | 3.844336 |
| N | -7.90377 | 0.233853 | 2.93343  |
| H | -8.22585 | 0.067083 | 1.991185 |
| H | -6.97521 | -0.10262 | 3.24832  |
| N | -8.11868 | 1.023166 | 5.067441 |
| H | -8.66505 | 1.406122 | 5.826549 |
| H | -7.19511 | 0.607855 | 5.248748 |
| C | -3.85992 | -2.52094 | -7.04919 |
| H | -3.82189 | -3.38951 | -7.71901 |
| H | -3.90256 | -1.6211  | -7.68473 |
| N | -2.65866 | -2.52973 | -6.23401 |

|    |          |          |          |
|----|----------|----------|----------|
| H  | -2.13473 | -3.44045 | -6.13252 |
| C  | -2.37861 | -1.58688 | -5.3434  |
| N  | -3.15748 | -0.49233 | -5.2117  |
| H  | -4.04989 | -0.48362 | -5.68777 |
| H  | -3.12706 | 0.01846  | -4.32546 |
| N  | -1.30997 | -1.70453 | -4.53652 |
| H  | -0.63995 | -2.47445 | -4.63019 |
| H  | -0.87201 | -0.83952 | -4.19426 |
| O  | -3.44166 | 0.528441 | -2.48237 |
| C  | -3.63889 | 1.203123 | -1.46469 |
| O  | -2.75144 | 1.333042 | -0.52299 |
| C  | -4.92356 | 1.977705 | -1.27931 |
| H  | -5.25363 | 1.960364 | -0.2338  |
| H  | -4.73048 | 3.029128 | -1.54434 |
| O  | -0.17161 | 0.235504 | 0.222766 |
| O  | -1.25474 | -0.98649 | 2.422903 |
| Fe | -0.80177 | 1.828187 | -1.00114 |
| C  | -0.39754 | -2.12811 | -1.01922 |
| N  | -1.50895 | -1.31653 | -1.56479 |
| H  | -2.08014 | -0.93539 | -0.80094 |
| H  | -1.13218 | -0.52594 | -2.14132 |
| H  | -2.11202 | -1.86615 | -2.18381 |
| C  | -0.93944 | -3.18149 | -0.02351 |
| O  | -1.99122 | -2.83226 | 0.61427  |
| O  | -0.31032 | -4.23237 | 0.065441 |
| C  | 0.70363  | -1.22359 | -0.50374 |
| C  | 1.66857  | -1.78534 | 0.507791 |
| C  | 3.118009 | -1.70946 | 0.022744 |
| C  | 3.684448 | -0.29448 | -0.02163 |
| N  | 4.551253 | -0.02809 | 1.153506 |
| H  | 4.76707  | 0.972163 | 1.238188 |
| H  | 4.100058 | -0.41595 | 2.061744 |
| H  | 5.438381 | -0.54726 | 0.998523 |
| H  | -9.68866 | -2.05262 | -1.27379 |
| H  | -4.35608 | 9.764883 | 3.73624  |
| H  | -3.10398 | 10.50906 | -0.62897 |
| H  | 4.296585 | 7.43645  | -2.29506 |
| H  | 12.07916 | 1.406145 | -3.22767 |
| H  | -7.30962 | 6.019378 | 5.125114 |
| H  | -9.5417  | 5.294067 | 1.445716 |
| H  | -3.18401 | 7.575002 | -3.91289 |
| H  | -5.71743 | 1.613462 | -1.94062 |
| H  | 6.333354 | -3.58549 | 4.913914 |
| H  | 4.180238 | -8.66539 | 1.942045 |
| H  | 2.807121 | -6.51651 | 7.786287 |
| H  | -4.30807 | -0.51091 | 6.486298 |
| H  | -4.80896 | -4.76761 | 4.279808 |

|   |          |          |          |
|---|----------|----------|----------|
| H | 3.114429 | -6.96313 | -1.59194 |
| H | 0.614488 | -10.6207 | -1.26376 |
| H | -4.48952 | -5.25333 | -6.16385 |
| H | -1.03308 | -0.44267 | 1.6335   |
| H | -1.45957 | -1.86433 | 2.029493 |
| H | 4.292695 | -0.17327 | -0.92273 |
| H | 2.893426 | 0.46264  | -0.04356 |
| H | 3.19857  | -2.13456 | -0.98178 |
| H | 3.735268 | -2.34722 | 0.667703 |
| H | 1.559547 | -1.26384 | 1.468846 |
| H | 1.395746 | -2.82755 | 0.712858 |
| H | 0.54555  | 0.658921 | 0.762984 |
| H | 1.172254 | -0.66021 | -1.31116 |
| H | 0.044309 | -2.67473 | -1.87299 |
| H | -4.77767 | -2.59277 | -6.43948 |
| O | 1.492234 | 1.689625 | 1.8308   |
| H | 0.989818 | 2.514191 | 1.908487 |
| H | 1.311241 | 1.225793 | 2.70894  |
| O | -2.02361 | 1.834554 | 2.135654 |
| H | -2.57133 | 1.489095 | 1.405269 |
| H | -1.39841 | 2.410054 | 1.662423 |
| O | 3.795486 | 2.694302 | 0.40743  |
| H | 3.603922 | 3.553596 | -0.01502 |
| H | 3.013902 | 2.441089 | 0.934378 |
| O | 0.499623 | 0.481448 | 3.942296 |
| H | -0.08906 | -0.13264 | 3.449686 |
| H | -0.12777 | 1.0881   | 4.39668  |
| O | -1.59154 | 2.041307 | 4.774524 |
| H | -1.92625 | 2.001341 | 3.848224 |
| H | -1.51948 | 2.981019 | 4.985093 |
| O | 3.898197 | 7.058031 | 0.919715 |
| H | 3.88979  | 6.226869 | 0.400668 |
| H | 4.77323  | 7.127032 | 1.323541 |

**<sup>5</sup>Pr<sub>C,C3</sub>**

|   |          |          |          |
|---|----------|----------|----------|
| C | -3.91006 | 6.135064 | -2.38673 |
| H | -4.68014 | 5.934647 | -1.62847 |
| C | -2.8217  | 5.054157 | -2.32969 |
| H | -1.95973 | 5.360183 | -2.93424 |
| H | -2.46277 | 4.958363 | -1.29112 |
| C | -3.31421 | 3.710617 | -2.86034 |
| H | -3.90156 | 3.154362 | -2.11474 |
| H | -4.0102  | 3.876809 | -3.70253 |
| C | -2.21182 | 2.827443 | -3.42407 |
| O | -1.08724 | 3.292765 | -3.69234 |
| N | -2.54483 | 1.55247  | -3.6276  |
| H | -3.46951 | 1.141162 | -3.38151 |
| H | -1.90522 | 0.938634 | -4.12043 |
| C | -3.34015 | 7.534434 | -2.23082 |
| O | -2.89188 | 8.157217 | -3.20742 |
| N | -3.33107 | 8.028133 | -0.98456 |
| H | -3.52688 | 7.384995 | -0.20486 |
| C | -2.7857  | 9.330188 | -0.64258 |
| H | -3.04939 | 9.510327 | 0.410352 |
| C | -1.26858 | 9.457907 | -0.82948 |
| H | -1.05309 | 9.525395 | -1.90799 |
| H | -0.95497 | 10.41768 | -0.38302 |
| C | -0.46722 | 8.307686 | -0.22183 |
| H | -0.68614 | 7.373791 | -0.76412 |
| H | -0.76734 | 8.119271 | 0.822528 |
| C | 1.034645 | 8.574291 | -0.29036 |
| H | 1.314726 | 8.894688 | -1.30941 |
| H | 1.291825 | 9.412469 | 0.387305 |
| N | 1.787718 | 7.375678 | 0.041501 |
| H | 1.377363 | 6.696973 | 0.722505 |
| C | 3.090181 | 7.220204 | -0.18222 |
| N | 3.853539 | 8.258931 | -0.61163 |
| H | 3.557602 | 9.191827 | -0.34755 |
| H | 4.864894 | 8.072608 | -0.62383 |
| N | 3.651312 | 6.023993 | -0.02388 |
| H | 3.077923 | 5.172944 | 0.086687 |
| H | 4.666316 | 5.950015 | -0.01118 |
| C | 3.470924 | 7.00323  | -4.67963 |
| H | 3.165589 | 8.056712 | -4.58901 |
| C | 2.538909 | 6.124578 | -3.81593 |
| H | 2.872044 | 5.078339 | -3.87538 |
| H | 2.621445 | 6.418448 | -2.75936 |
| C | 1.118021 | 6.238614 | -4.26502 |
| N | 0.638596 | 5.56367  | -5.37134 |
| C | -0.61665 | 5.962157 | -5.53348 |



|   |          |          |          |
|---|----------|----------|----------|
| H | -1.30203 | 5.604672 | -6.29953 |
| N | -0.96103 | 6.876175 | -4.59929 |
| H | -1.87445 | 7.325638 | -4.39356 |
| C | 0.124452 | 7.059607 | -3.77848 |
| H | 0.090529 | 7.742104 | -2.93749 |
| C | 4.922858 | 6.822476 | -4.29885 |
| O | 5.586769 | 5.845836 | -4.64627 |
| N | 5.441235 | 7.790642 | -3.49657 |
| H | 4.81708  | 8.492636 | -3.11439 |
| C | 6.783376 | 7.685448 | -2.93977 |
| H | 7.434033 | 7.311572 | -3.74387 |
| C | 7.283044 | 9.039394 | -2.45685 |
| H | 8.30663  | 8.954885 | -2.0654  |
| H | 6.651566 | 9.430861 | -1.64504 |
| H | 7.284559 | 9.760471 | -3.28674 |
| C | 6.750028 | 6.646064 | -1.80612 |
| O | 6.327866 | 6.941116 | -0.68007 |
| N | 7.156077 | 5.416044 | -2.15148 |
| H | 7.304772 | 5.261144 | -3.14584 |
| C | 7.100507 | 4.251839 | -1.28529 |
| H | 6.570769 | 4.531979 | -0.3633  |
| C | 6.412632 | 3.056059 | -1.95656 |
| H | 6.950515 | 2.85527  | -2.90329 |
| C | 6.553654 | 1.823273 | -1.06546 |
| H | 7.61146  | 1.574046 | -0.88602 |
| H | 6.056012 | 1.996689 | -0.0981  |
| H | 6.087573 | 0.954442 | -1.54312 |
| C | 4.945357 | 3.338973 | -2.28802 |
| H | 4.849654 | 4.214354 | -2.94426 |
| H | 4.360207 | 3.515233 | -1.37346 |
| H | 4.508173 | 2.477143 | -2.81649 |
| C | 2.893205 | 0.947101 | 5.774021 |
| H | 2.792018 | -0.13728 | 5.936468 |
| C | 1.498722 | 1.577789 | 5.714697 |
| H | 0.885772 | 0.982826 | 5.017159 |
| C | 0.813182 | 1.55223  | 7.075677 |
| H | -0.18835 | 2.00356  | 7.003212 |
| H | 1.393817 | 2.133013 | 7.808943 |
| H | 0.698611 | 0.521397 | 7.445838 |
| O | 1.625525 | 2.902318 | 5.225061 |
| H | 0.717227 | 3.236668 | 4.999733 |
| C | 3.719085 | 1.161905 | 4.529542 |
| O | 4.949897 | 1.357817 | 4.604277 |
| N | 3.091349 | 1.16074  | 3.342405 |
| H | 2.071415 | 1.043938 | 3.279754 |
| C | 3.710721 | 1.699771 | 2.153399 |
| H | 4.643644 | 1.181435 | 1.899678 |

|   |          |          |          |
|---|----------|----------|----------|
| H | 3.021199 | 1.556966 | 1.310166 |
| C | 4.002959 | 3.211699 | 2.221414 |
| O | 4.899662 | 3.689761 | 1.516193 |
| N | 3.207982 | 3.890433 | 3.057189 |
| H | 2.587868 | 3.370316 | 3.693893 |
| C | 3.227614 | 5.326567 | 3.26784  |
| H | 3.830537 | 5.781409 | 2.472601 |
| C | 1.808788 | 5.905417 | 3.292534 |
| H | 1.231072 | 5.451219 | 4.11483  |
| H | 1.883843 | 6.984245 | 3.506924 |
| O | 1.105914 | 5.761192 | 2.078655 |
| H | 0.864499 | 4.816683 | 1.892859 |
| C | 7.390948 | -3.98465 | 4.529715 |
| H | 6.631267 | -4.32336 | 5.250183 |
| C | 6.946533 | -2.70415 | 3.82324  |
| H | 7.795354 | -2.30948 | 3.243627 |
| H | 6.715072 | -1.94562 | 4.590674 |
| C | 5.7379   | -2.84417 | 2.881936 |
| H | 6.060731 | -3.45871 | 2.023694 |
| C | 4.55353  | -3.55366 | 3.544922 |
| H | 4.777384 | -4.61052 | 3.751501 |
| H | 3.674425 | -3.53643 | 2.884326 |
| H | 4.258668 | -3.05383 | 4.481247 |
| C | 5.343455 | -1.46258 | 2.359489 |
| H | 4.504927 | -1.52118 | 1.65297  |
| H | 6.185329 | -0.97152 | 1.849191 |
| H | 5.031908 | -0.80932 | 3.186489 |
| C | 7.736287 | -5.10329 | 3.564848 |
| O | 8.330024 | -4.90561 | 2.504377 |
| N | 7.392743 | -6.35092 | 3.964797 |
| H | 6.816636 | -6.45608 | 4.79081  |
| C | 7.60187  | -7.49601 | 3.123852 |
| H | 8.545012 | -7.35739 | 2.572955 |
| C | 6.482767 | -7.6811  | 2.090883 |
| O | 5.668383 | -6.7874  | 1.861443 |
| N | 6.506978 | -8.85914 | 1.444542 |
| H | 7.129401 | -9.58451 | 1.779995 |
| C | 5.523715 | -9.2     | 0.436194 |
| H | 5.630978 | -8.54409 | -0.43754 |
| C | 4.103638 | -9.10699 | 1.003147 |
| O | 3.8283   | -9.49484 | 2.125173 |
| N | 3.195687 | -8.57119 | 0.147704 |
| C | 1.814533 | -8.42028 | 0.5398   |
| C | 0.981103 | -8.14097 | -0.71067 |
| C | 1.626404 | -7.29237 | 1.602133 |
| O | 1.502063 | -7.74011 | -1.75473 |
| C | 2.046828 | -5.95189 | 1.105181 |

|   |          |          |          |
|---|----------|----------|----------|
| C | 1.31409  | -4.84324 | 0.736657 |
| N | 3.367444 | -5.62505 | 0.841996 |
| C | 3.413719 | -4.38959 | 0.333083 |
| N | 2.180962 | -3.87049 | 0.25178  |
| H | 3.497043 | -8.12112 | -0.71491 |
| H | 1.477487 | -9.35486 | 1.014209 |
| H | 0.574912 | -7.25325 | 1.918691 |
| H | 2.228752 | -7.59384 | 2.471849 |
| H | 0.241388 | -4.68369 | 0.794136 |
| H | 4.32874  | -3.89126 | 0.029859 |
| H | 4.200592 | -6.20787 | 1.045694 |
| N | -0.34697 | -8.31405 | -0.57044 |
| H | -0.75198 | -8.45339 | 0.363831 |
| C | -1.26564 | -7.84313 | -1.58208 |
| H | -0.89119 | -8.11376 | -2.57793 |
| C | -1.47966 | -6.33105 | -1.47259 |
| O | -1.62844 | -5.79808 | -0.35833 |
| N | -1.4637  | -5.64321 | -2.6168  |
| C | -1.72042 | -4.207   | -2.71684 |
| C | -3.23294 | -4.00251 | -2.89557 |
| C | -0.97373 | -3.6663  | -3.94334 |
| O | -3.81931 | -4.62562 | -3.76503 |
| C | -0.96803 | -2.1486  | -4.10062 |
| C | -0.1631  | -1.35228 | -3.11695 |
| O | 0.32144  | -0.26003 | -3.44622 |
| O | -0.02611 | -1.81968 | -1.89624 |
| H | -1.49103 | -6.16552 | -3.48801 |
| H | -1.36157 | -3.73777 | -1.79517 |
| H | 0.055669 | -4.04956 | -3.92733 |
| H | -1.46799 | -4.0905  | -4.83206 |
| H | -2.00605 | -1.74596 | -4.07505 |
| H | -0.60551 | -1.87751 | -5.10248 |
| N | -3.80805 | -3.11829 | -2.05032 |
| H | -3.30428 | -2.88169 | -1.19166 |
| C | -5.24089 | -2.84223 | -2.13696 |
| H | -5.49784 | -2.23119 | -1.25883 |
| C | -5.60768 | -2.07145 | -3.41105 |
| H | -5.54918 | -2.74519 | -4.27227 |
| H | -6.63938 | -1.70713 | -3.31355 |
| C | -4.63331 | -0.91107 | -3.60603 |
| O | -4.7955  | 0.124394 | -2.85741 |
| O | -3.70446 | -1.0296  | -4.41649 |
| C | -6.03695 | -4.15801 | -2.01116 |
| O | -6.95763 | -4.44686 | -2.75149 |
| N | -5.63466 | -4.9555  | -0.97249 |
| H | -4.82338 | -4.64998 | -0.44593 |
| C | -5.94244 | -6.38054 | -0.93656 |

|   |          |          |          |
|---|----------|----------|----------|
| H | -5.72102 | -6.81814 | -1.92456 |
| C | -5.09798 | -7.07263 | 0.133063 |
| H | -5.33909 | -8.14399 | 0.139085 |
| H | -5.32677 | -6.66069 | 1.129961 |
| H | -4.02043 | -6.94671 | -0.05544 |
| C | -7.42447 | -6.72525 | -0.70198 |
| O | -7.80878 | -7.85871 | -0.93221 |
| N | -8.19652 | -5.72712 | -0.21423 |
| H | -7.76351 | -4.83149 | -0.01657 |
| C | -9.62105 | -5.85905 | 0.014717 |
| H | -9.85913 | -6.92057 | -0.15396 |
| C | -9.99607 | -5.47948 | 1.460144 |
| H | -9.53075 | -6.21183 | 2.137267 |
| H | -11.0861 | -5.57595 | 1.544603 |
| C | -9.56047 | -4.08006 | 1.827171 |
| C | -8.29361 | -3.84307 | 2.38899  |
| H | -7.64201 | -4.69431 | 2.610361 |
| C | -7.87553 | -2.54562 | 2.700217 |
| H | -6.90504 | -2.35244 | 3.162013 |
| C | -8.72451 | -1.46269 | 2.454944 |
| H | -8.39884 | -0.46306 | 2.740797 |
| C | -9.98163 | -1.68435 | 1.8883   |
| H | -10.65   | -0.84208 | 1.694832 |
| C | -10.3959 | -2.98019 | 1.572988 |
| H | -11.3729 | -3.15404 | 1.120161 |
| C | -10.4722 | -5.05239 | -0.99341 |
| O | -11.6526 | -4.83156 | -0.75238 |
| N | -9.83156 | -4.65054 | -2.11236 |
| H | -8.84096 | -4.85164 | -2.2261  |
| C | -10.4538 | -3.82646 | -3.13276 |
| H | -11.5338 | -3.82578 | -2.93481 |
| C | -9.88698 | -2.40182 | -3.16004 |
| H | -8.81265 | -2.4654  | -3.40423 |
| H | -10.3644 | -1.85739 | -3.99519 |
| C | -10.0619 | -1.59839 | -1.86234 |
| H | -9.58618 | -2.17124 | -1.04645 |
| C | -9.33746 | -0.2526  | -1.95897 |
| H | -8.26666 | -0.38147 | -2.17825 |
| H | -9.77445 | 0.377058 | -2.75323 |
| H | -9.40632 | 0.306435 | -1.01245 |
| C | -11.5372 | -1.40755 | -1.49631 |
| H | -12.0352 | -2.3679  | -1.29999 |
| H | -11.638  | -0.78839 | -0.59121 |
| H | -12.0789 | -0.89339 | -2.30924 |
| C | -6.69695 | 2.548767 | 5.217712 |
| H | -6.78158 | 2.062938 | 6.201607 |
| C | -5.40638 | 2.134278 | 4.499354 |

|   |          |          |          |
|---|----------|----------|----------|
| H | -5.22123 | 2.84773  | 3.681957 |
| H | -4.54257 | 2.200671 | 5.180528 |
| C | -5.35252 | 0.768776 | 3.814777 |
| O | -6.31413 | 0.011117 | 3.816607 |
| O | -4.22972 | 0.569789 | 3.201932 |
| C | -6.60352 | 4.059565 | 5.306989 |
| O | -6.97969 | 4.795589 | 4.397393 |
| N | -5.85922 | 4.549707 | 6.340931 |
| H | -5.5929  | 3.92823  | 7.0949   |
| C | -5.36787 | 5.9135   | 6.329135 |
| H | -6.19276 | 6.629802 | 6.202936 |
| C | -4.37403 | 6.226938 | 5.195299 |
| O | -4.09115 | 7.37275  | 4.906761 |
| N | -3.87169 | 5.145924 | 4.528041 |
| H | -4.15158 | 4.219855 | 4.82007  |
| C | -3.10854 | 5.293404 | 3.309126 |
| H | -2.27448 | 5.990128 | 3.476152 |
| C | -2.55462 | 3.945802 | 2.829385 |
| H | -1.91494 | 4.15591  | 1.962382 |
| H | -3.37618 | 3.29444  | 2.49858  |
| C | -1.68989 | 3.229715 | 3.849478 |
| O | -0.67622 | 3.781459 | 4.305473 |
| N | -2.08531 | 1.996507 | 4.186555 |
| H | -2.89381 | 1.499589 | 3.748242 |
| H | -1.50365 | 1.436376 | 4.802654 |
| C | -3.91612 | 5.8789   | 2.135366 |
| O | -3.28742 | 6.298264 | 1.155393 |
| N | -5.25062 | 5.822329 | 2.212486 |
| H | -5.69968 | 5.4961   | 3.071229 |
| C | -6.1387  | 6.322587 | 1.174761 |
| H | -5.56244 | 6.385746 | 0.242859 |
| C | -7.37533 | 5.433448 | 0.989125 |
| H | -7.92506 | 5.388883 | 1.941575 |
| H | -8.03431 | 5.942441 | 0.266556 |
| C | -7.07235 | 4.030397 | 0.513643 |
| C | -6.72536 | 3.766579 | -0.82017 |
| H | -6.70143 | 4.586719 | -1.54397 |
| C | -6.43066 | 2.47337  | -1.25836 |
| H | -6.17703 | 2.275955 | -2.30101 |
| C | -6.47691 | 1.402687 | -0.35187 |
| O | -6.13813 | 0.13785  | -0.71806 |
| H | -5.69154 | 0.131854 | -1.64183 |
| C | -6.85287 | 1.641597 | 0.974949 |
| H | -6.92761 | 0.804403 | 1.66803  |
| C | -7.13952 | 2.941325 | 1.394892 |
| H | -7.43366 | 3.123698 | 2.429696 |
| C | 5.802801 | -6.58733 | -3.72856 |

|   |          |          |          |
|---|----------|----------|----------|
| C | 5.940409 | -6.19963 | -2.26069 |
| C | 5.052949 | -5.52401 | -4.56367 |
| O | 5.192248 | -6.67056 | -1.39924 |
| C | 3.84596  | -4.99579 | -3.86162 |
| C | 3.491845 | -3.70886 | -3.5241  |
| N | 2.879732 | -5.79803 | -3.27851 |
| C | 2.014294 | -5.0189  | -2.61256 |
| N | 2.354547 | -3.73928 | -2.73525 |
| H | 6.790816 | -6.77208 | -4.1773  |
| H | 4.788    | -5.96374 | -5.53977 |
| H | 5.710855 | -4.66886 | -4.778   |
| H | 3.978312 | -2.77655 | -3.79759 |
| H | 1.188735 | -5.4249  | -2.03953 |
| H | 2.840835 | -6.81283 | -3.20494 |
| N | 6.90357  | -5.30238 | -1.97403 |
| H | 7.400653 | -4.81226 | -2.71605 |
| C | 7.200384 | -4.81884 | -0.64608 |
| H | 7.770975 | -5.55196 | -0.05319 |
| H | 6.276177 | -4.64648 | -0.0737  |
| C | 7.996385 | -3.5146  | -0.78289 |
| O | 8.073231 | -2.95231 | -1.87202 |
| N | 8.58732  | -3.07495 | 0.347209 |
| H | 8.530954 | -3.66067 | 1.189226 |
| C | 9.51174  | -1.95391 | 0.331346 |
| H | 9.806138 | -1.78539 | -0.71474 |
| C | 8.944564 | -0.65831 | 0.918983 |
| H | 8.043609 | -0.36814 | 0.35452  |
| H | 8.6185   | -0.84304 | 1.95582  |
| C | 9.9694   | 0.477221 | 0.894265 |
| H | 10.24406 | 0.716378 | -0.14715 |
| H | 10.90536 | 0.145981 | 1.380098 |
| C | 9.495873 | 1.771591 | 1.561986 |
| H | 10.26181 | 2.556029 | 1.462678 |
| H | 8.594115 | 2.144175 | 1.061092 |
| N | 9.190736 | 1.591223 | 2.980294 |
| H | 9.958912 | 1.304653 | 3.577249 |
| C | 7.957042 | 1.546212 | 3.512042 |
| N | 6.890584 | 2.005595 | 2.872866 |
| H | 6.91412  | 2.673783 | 2.110156 |
| H | 5.992096 | 1.881821 | 3.377459 |
| N | 7.770295 | 1.010979 | 4.729733 |
| H | 8.49867  | 0.488888 | 5.196492 |
| H | 6.829134 | 1.045449 | 5.130855 |
| C | 3.647226 | 3.975856 | -6.70236 |
| H | 3.393481 | 4.841439 | -7.3281  |
| H | 4.022488 | 3.191094 | -7.37954 |
| N | 2.435985 | 3.549898 | -6.02361 |

|    |          |          |          |
|----|----------|----------|----------|
| H  | 1.654344 | 4.255283 | -5.92641 |
| C  | 2.31629  | 2.407853 | -5.36194 |
| N  | 3.32112  | 1.499787 | -5.33934 |
| H  | 4.215203 | 1.756763 | -5.73505 |
| H  | 3.350969 | 0.819707 | -4.57941 |
| N  | 1.189243 | 2.11467  | -4.70262 |
| H  | 0.388807 | 2.758703 | -4.59641 |
| H  | 0.96996  | 1.137449 | -4.5107  |
| O  | 3.755864 | -0.05174 | -2.76615 |
| C  | 3.909902 | -0.74191 | -1.76348 |
| O  | 2.95678  | -0.91988 | -0.86895 |
| C  | 5.20411  | -1.4774  | -1.48083 |
| H  | 5.034196 | -2.55966 | -1.58401 |
| H  | 5.999894 | -1.20402 | -2.1815  |
| O  | -0.124   | 0.203828 | -0.00719 |
| O  | 0.458803 | 1.070778 | 2.491836 |
| Fe | 1.708285 | -2.4434  | -1.239   |
| C  | 0.407916 | 2.314687 | -1.03305 |
| N  | 1.498809 | 1.543761 | -1.69581 |
| H  | 1.89736  | 0.822232 | -1.07161 |
| H  | 1.143453 | 0.986879 | -2.50099 |
| H  | 2.255962 | 2.178024 | -1.9703  |
| C  | 1.073325 | 3.179942 | 0.065925 |
| O  | 0.443076 | 3.393107 | 1.133333 |
| O  | 2.197311 | 3.62364  | -0.25124 |
| C  | -0.7117  | 1.327749 | -0.68749 |
| C  | -1.86415 | 1.92726  | 0.110821 |
| C  | -3.16205 | 1.125717 | 0.07879  |
| C  | -2.99504 | -0.32763 | 0.513249 |
| N  | -4.25968 | -0.87114 | 1.067523 |
| H  | -4.19353 | -1.8904  | 1.165969 |
| H  | -4.38001 | -0.39172 | 2.049957 |
| H  | -5.07044 | -0.61715 | 0.453744 |
| H  | 8.129743 | 3.967185 | -0.99811 |
| H  | 7.701173 | -8.40066 | 3.742755 |
| H  | 5.697643 | -10.2397 | 0.12436  |
| H  | -2.24085 | -8.3323  | -1.43385 |
| H  | -10.2987 | -4.29881 | -4.11708 |
| H  | 8.303721 | -3.78331 | 5.117076 |
| H  | 10.41753 | -2.24554 | 0.88931  |
| H  | 5.2539   | -7.53941 | -3.74428 |
| H  | 5.530597 | -1.29422 | -0.44879 |
| H  | -7.57472 | 2.268217 | 4.622892 |
| H  | -6.45857 | 7.348971 | 1.427394 |
| H  | -4.88309 | 6.133914 | 7.290762 |
| H  | 3.476506 | 1.372    | 6.603722 |
| H  | 3.710322 | 5.557136 | 4.234949 |

|   |          |          |          |
|---|----------|----------|----------|
| H | -4.4     | 6.113792 | -3.37243 |
| H | -3.28436 | 10.10336 | -1.24791 |
| H | 3.360883 | 6.72263  | -5.73583 |
| H | 0.314737 | 0.587908 | 1.648785 |
| H | 0.331371 | 2.012236 | 2.227258 |
| H | -2.67861 | -0.95477 | -0.32991 |
| H | -2.23656 | -0.43518 | 1.297409 |
| H | -3.61185 | 1.143283 | -0.92258 |
| H | -3.87568 | 1.616546 | 0.756145 |
| H | -1.53394 | 2.047655 | 1.145549 |
| H | -2.05916 | 2.94306  | -0.26324 |
| H | -0.22212 | -0.58522 | -0.57707 |
| H | -1.10887 | 0.968288 | -1.64749 |
| H | 0.01839  | 3.016305 | -1.78851 |
| H | 4.443379 | 4.289753 | -6.00554 |
| O | -0.73116 | -2.43337 | 2.099933 |
| H | -0.00282 | -1.90786 | 1.728375 |
| H | -0.9495  | -1.92481 | 2.92353  |
| O | 1.896282 | -1.43385 | 1.680554 |
| H | 2.392841 | -0.87161 | 1.058723 |
| H | 2.110588 | -2.33705 | 1.376982 |
| O | -2.71047 | -3.36729 | 0.52996  |
| H | -2.38947 | -4.25441 | 0.281079 |
| H | -2.00375 | -3.00187 | 1.119642 |
| O | -0.76054 | -0.7094  | 4.188435 |
| H | -0.47639 | 0.027864 | 3.60497  |
| H | 0.09435  | -1.05322 | 4.520669 |
| O | 1.83161  | -1.74324 | 4.445945 |
| H | 1.974332 | -1.53923 | 3.496757 |
| H | 1.66343  | -2.69563 | 4.459796 |
| O | -1.70911 | -7.62835 | 1.705287 |
| H | -1.85554 | -6.84144 | 1.140426 |
| H | -2.52058 | -7.76723 | 2.211176 |



<sup>5</sup>TS1<sub>C,C4</sub>

|   |          |          |          |
|---|----------|----------|----------|
| C | 1.000584 | -6.02854 | -3.12233 |
| H | 1.105058 | -5.52874 | -2.14617 |
| C | 0.492985 | -5.07881 | -4.20086 |
| H | 0.294785 | -5.66917 | -5.10616 |
| H | -0.47261 | -4.64456 | -3.90033 |
| C | 1.469107 | -3.96424 | -4.55044 |
| H | 1.597621 | -3.26105 | -3.71044 |
| H | 2.477814 | -4.36357 | -4.73768 |
| C | 1.015588 | -3.17292 | -5.77038 |
| O | -0.16172 | -3.15264 | -6.13958 |
| N | 1.989796 | -2.49826 | -6.41086 |
| H | 2.933963 | -2.41163 | -6.02042 |
| H | 1.732211 | -1.95047 | -7.22423 |
| C | 0.130554 | -7.27485 | -2.98454 |
| O | -0.46084 | -7.77117 | -3.94987 |
| N | 0.097412 | -7.82107 | -1.75484 |
| H | 0.423567 | -7.27219 | -0.95053 |
| C | -0.68732 | -9.00446 | -1.44362 |
| H | -0.33574 | -9.36937 | -0.4664  |
| C | -2.20055 | -8.75845 | -1.38755 |
| H | -2.57462 | -8.66187 | -2.41921 |
| H | -2.67567 | -9.66214 | -0.9678  |
| C | -2.58823 | -7.52441 | -0.57489 |
| H | -2.19125 | -6.61271 | -1.04672 |
| H | -2.13078 | -7.55809 | 0.427713 |
| C | -4.0997  | -7.3778  | -0.43889 |
| H | -4.57135 | -7.45512 | -1.4369  |
| H | -4.50563 | -8.2091  | 0.168607 |
| N | -4.43746 | -6.09798 | 0.161572 |
| H | -3.66269 | -5.44829 | 0.39447  |
| C | -5.66748 | -5.59742 | 0.205329 |
| N | -6.72374 | -6.30031 | -0.28671 |
| H | -6.63882 | -7.30496 | -0.37074 |
| H | -7.64275 | -5.91198 | -0.05728 |
| N | -5.87301 | -4.37256 | 0.684468 |
| H | -5.12705 | -4.00487 | 1.307148 |
| H | -6.83953 | -4.04885 | 0.759655 |
| C | -6.76309 | -4.95511 | -4.51178 |
| H | -6.91417 | -6.02986 | -4.69952 |
| C | -5.50606 | -4.75081 | -3.6379  |
| H | -5.43184 | -3.6859  | -3.36943 |
| H | -5.61302 | -5.30498 | -2.69357 |
| C | -4.25497 | -5.17624 | -4.3299  |
| N | -3.74002 | -4.46988 | -5.40121 |
| C | -2.66008 | -5.13176 | -5.79799 |

|   |          |          |          |
|---|----------|----------|----------|
| H | -1.97147 | -4.81838 | -6.58013 |
| N | -2.46335 | -6.23496 | -5.03885 |
| H | -1.64017 | -6.85435 | -5.00028 |
| C | -3.46183 | -6.2771  | -4.09629 |
| H | -3.51361 | -7.06448 | -3.35404 |
| C | -7.96946 | -4.33974 | -3.83841 |
| O | -8.33598 | -3.18681 | -4.0609  |
| N | -8.57079 | -5.12392 | -2.90264 |
| H | -8.14807 | -6.01669 | -2.67509 |
| C | -9.63025 | -4.63044 | -2.02911 |
| H | -10.2829 | -3.99989 | -2.65092 |
| C | -10.4341 | -5.77903 | -1.44127 |
| H | -11.2365 | -5.39642 | -0.79549 |
| H | -9.80422 | -6.43583 | -0.82216 |
| H | -10.885  | -6.37677 | -2.24629 |
| C | -8.99178 | -3.74066 | -0.94102 |
| O | -8.63083 | -4.21328 | 0.145636 |
| N | -8.83034 | -2.46538 | -1.31767 |
| H | -9.02904 | -2.28065 | -2.3018  |
| C | -8.19373 | -1.39569 | -0.56538 |
| H | -7.83245 | -1.78394 | 0.396519 |
| C | -7.04828 | -0.74815 | -1.36436 |
| H | -7.38885 | -0.69604 | -2.41542 |
| C | -6.78345 | 0.677304 | -0.87904 |
| H | -7.6661  | 1.323261 | -1.02093 |
| H | -6.52322 | 0.655004 | 0.190565 |
| H | -5.93615 | 1.12268  | -1.41955 |
| C | -5.77474 | -1.59725 | -1.31513 |
| H | -5.97658 | -2.65017 | -1.55374 |
| H | -5.32912 | -1.56613 | -0.3093  |
| H | -5.03332 | -1.23028 | -2.04328 |
| C | -2.64746 | 0.812417 | 5.976717 |
| H | -2.03165 | 1.721431 | 6.064736 |
| C | -1.70851 | -0.38503 | 5.80049  |
| H | -1.0102  | -0.14879 | 4.984478 |
| C | -0.88453 | -0.64465 | 7.055038 |
| H | -0.2154  | -1.50543 | 6.897728 |
| H | -1.54061 | -0.88045 | 7.907228 |
| H | -0.2668  | 0.230835 | 7.307486 |
| O | -2.47683 | -1.52574 | 5.441449 |
| H | -1.89533 | -2.1407  | 4.929061 |
| C | -3.62184 | 0.987007 | 4.837887 |
| O | -4.80492 | 1.324328 | 5.051089 |
| N | -3.19055 | 0.721497 | 3.59645  |
| H | -2.22931 | 0.403383 | 3.413022 |
| C | -4.10408 | 0.500556 | 2.500428 |
| H | -4.68847 | 1.397186 | 2.254169 |

|   |          |          |          |
|---|----------|----------|----------|
| H | -3.50829 | 0.236449 | 1.615739 |
| C | -5.07768 | -0.66882 | 2.72702  |
| O | -6.11682 | -0.73589 | 2.06095  |
| N | -4.68793 | -1.55739 | 3.648458 |
| H | -3.82587 | -1.3956  | 4.186195 |
| C | -5.37368 | -2.7918  | 3.964171 |
| H | -6.23041 | -2.8925  | 3.283037 |
| C | -4.41023 | -3.97114 | 3.818766 |
| H | -3.58104 | -3.87073 | 4.539925 |
| H | -4.94371 | -4.90485 | 4.060705 |
| O | -3.91438 | -4.09136 | 2.50697  |
| H | -3.28728 | -3.37133 | 2.259167 |
| C | -3.54711 | 7.859721 | 4.706815 |
| H | -2.72828 | 7.768958 | 5.435574 |
| C | -4.10904 | 6.481765 | 4.356427 |
| H | -5.05555 | 6.603244 | 3.80521  |
| H | -4.36739 | 5.976937 | 5.304191 |
| C | -3.17468 | 5.568352 | 3.543854 |
| H | -3.15403 | 5.953851 | 2.508609 |
| C | -1.7306  | 5.568346 | 4.057232 |
| H | -1.2583  | 6.555233 | 3.946038 |
| H | -1.13261 | 4.851732 | 3.478438 |
| H | -1.68463 | 5.270845 | 5.119702 |
| C | -3.75117 | 4.1526   | 3.517676 |
| H | -3.12507 | 3.47237  | 2.928148 |
| H | -4.76894 | 4.134827 | 3.098957 |
| H | -3.81077 | 3.740567 | 4.536758 |
| C | -3.08774 | 8.659236 | 3.503451 |
| O | -3.7459  | 8.74445  | 2.465411 |
| N | -1.92269 | 9.330385 | 3.658506 |
| H | -1.37818 | 9.177759 | 4.497252 |
| C | -1.41596 | 10.22239 | 2.652787 |
| H | -2.20994 | 10.9218  | 2.344876 |
| C | -0.88386 | 9.522033 | 1.395078 |
| O | -0.6917  | 8.31159  | 1.335676 |
| N | -0.65766 | 10.37864 | 0.379033 |
| H | -0.74211 | 11.37155 | 0.55873  |
| C | -0.07441 | 9.953374 | -0.87341 |
| H | -0.73942 | 9.245632 | -1.38116 |
| C | 1.304183 | 9.320249 | -0.66972 |
| O | 2.09897  | 9.752363 | 0.148592 |
| N | 1.555591 | 8.272438 | -1.49327 |
| C | 2.823152 | 7.586562 | -1.4305  |
| C | 3.02562  | 6.804144 | -2.72538 |
| C | 2.936044 | 6.660238 | -0.1802  |
| O | 2.081814 | 6.458685 | -3.44084 |
| C | 1.861715 | 5.630855 | -0.11685 |

|   |          |          |          |
|---|----------|----------|----------|
| C | 1.85604  | 4.286653 | -0.42094 |
| N | 0.552378 | 5.937155 | 0.223907 |
| C | -0.1908  | 4.82797  | 0.112767 |
| N | 0.565835 | 3.798606 | -0.27326 |
| H | 0.794754 | 7.836714 | -2.01783 |
| H | 3.618895 | 8.339964 | -1.33012 |
| H | 3.92495  | 6.181715 | -0.16666 |
| H | 2.882417 | 7.326124 | 0.694022 |
| H | 2.68467  | 3.653763 | -0.7296  |
| H | -1.25659 | 4.776606 | 0.3031   |
| H | 0.178967 | 6.85776  | 0.498417 |
| N | 4.310884 | 6.501189 | -3.00915 |
| H | 5.027754 | 6.589119 | -2.27566 |
| C | 4.611735 | 5.577208 | -4.07764 |
| H | 4.021123 | 5.832982 | -4.96746 |
| C | 4.338327 | 4.145358 | -3.62867 |
| O | 4.69544  | 3.749521 | -2.51133 |
| N | 3.673262 | 3.33867  | -4.46803 |
| C | 3.333348 | 1.993158 | -4.03398 |
| C | 4.610368 | 1.146174 | -3.90961 |
| C | 2.330005 | 1.343147 | -4.98676 |
| O | 5.425678 | 1.09529  | -4.81268 |
| C | 1.597116 | 0.145137 | -4.36663 |
| C | 0.580215 | 0.535425 | -3.31343 |
| O | -0.60407 | 0.139388 | -3.41484 |
| O | 0.97664  | 1.270443 | -2.35039 |
| H | 3.467016 | 3.640622 | -5.413   |
| H | 2.87978  | 2.091597 | -3.04425 |
| H | 1.58953  | 2.100019 | -5.29724 |
| H | 2.863128 | 1.009685 | -5.89121 |
| H | 2.326442 | -0.53938 | -3.90387 |
| H | 1.084332 | -0.42265 | -5.14952 |
| N | 4.705026 | 0.481778 | -2.7249  |
| H | 4.125111 | 0.796309 | -1.93768 |
| C | 5.848861 | -0.32778 | -2.36069 |
| H | 5.60007  | -0.80257 | -1.39884 |
| C | 6.144265 | -1.43884 | -3.39768 |
| H | 6.660421 | -1.01921 | -4.26646 |
| H | 6.783836 | -2.19735 | -2.92301 |
| C | 4.855368 | -2.06369 | -3.90526 |
| O | 4.117877 | -2.74946 | -3.03264 |
| O | 4.463888 | -1.92397 | -5.0456  |
| C | 7.123824 | 0.49586  | -2.09587 |
| O | 8.181959 | -0.06714 | -1.81568 |
| N | 7.007634 | 1.835411 | -2.19611 |
| H | 6.094238 | 2.267721 | -2.32003 |
| C | 8.180771 | 2.695919 | -2.28769 |

|   |          |          |          |
|---|----------|----------|----------|
| H | 8.998783 | 2.04664  | -2.63654 |
| C | 7.965396 | 3.828086 | -3.28106 |
| H | 8.910099 | 4.361187 | -3.45547 |
| H | 7.245044 | 4.556998 | -2.89196 |
| H | 7.602388 | 3.417834 | -4.23472 |
| C | 8.596799 | 3.208928 | -0.89476 |
| O | 8.521457 | 4.391465 | -0.56744 |
| N | 9.074173 | 2.234161 | -0.09293 |
| H | 8.947245 | 1.273594 | -0.42009 |
| C | 9.608692 | 2.477626 | 1.241201 |
| H | 10.38033 | 3.26294  | 1.145015 |
| C | 8.578201 | 3.006526 | 2.255103 |
| H | 8.362739 | 4.046524 | 1.97996  |
| H | 9.083282 | 3.008055 | 3.23144  |
| C | 7.276506 | 2.245661 | 2.3581   |
| C | 6.102378 | 2.792097 | 1.812649 |
| H | 6.156818 | 3.731243 | 1.254646 |
| C | 4.864468 | 2.177262 | 2.01494  |
| H | 3.955138 | 2.650328 | 1.641861 |
| C | 4.783352 | 0.986407 | 2.746077 |
| H | 3.806924 | 0.546558 | 2.965513 |
| C | 5.953069 | 0.401412 | 3.246245 |
| H | 5.909489 | -0.53575 | 3.806491 |
| C | 7.187849 | 1.029326 | 3.056442 |
| H | 8.093935 | 0.597006 | 3.481823 |
| C | 10.32937 | 1.213764 | 1.754087 |
| O | 10.33748 | 0.927435 | 2.940663 |
| N | 10.94848 | 0.471025 | 0.799621 |
| H | 10.89457 | 0.783012 | -0.16231 |
| C | 11.39236 | -0.89575 | 1.033025 |
| H | 11.59433 | -0.99075 | 2.107851 |
| C | 10.34559 | -1.91334 | 0.562265 |
| H | 10.17032 | -1.75658 | -0.51672 |
| H | 10.76993 | -2.92807 | 0.667785 |
| C | 8.998255 | -1.84414 | 1.298576 |
| H | 8.649867 | -0.79649 | 1.269931 |
| C | 7.937692 | -2.66564 | 0.565639 |
| H | 7.817649 | -2.31649 | -0.47113 |
| H | 8.203449 | -3.73718 | 0.540502 |
| H | 6.970594 | -2.57619 | 1.079036 |
| C | 9.105949 | -2.25975 | 2.769084 |
| H | 9.755112 | -1.57617 | 3.335326 |
| H | 8.113155 | -2.26542 | 3.243989 |
| H | 9.518586 | -3.28066 | 2.853902 |
| C | 5.444712 | -5.8163  | 5.277657 |
| H | 5.966845 | -6.16032 | 6.187058 |
| C | 5.260009 | -4.29005 | 5.351593 |

|   |          |          |          |
|---|----------|----------|----------|
| H | 4.523544 | -4.02032 | 6.126899 |
| H | 6.214995 | -3.82748 | 5.631253 |
| C | 4.823782 | -3.67738 | 4.019624 |
| O | 5.63608  | -2.96659 | 3.407907 |
| O | 3.641055 | -3.95264 | 3.584439 |
| C | 4.16073  | -6.61714 | 5.157653 |
| O | 3.969458 | -7.45559 | 4.276772 |
| N | 3.22408  | -6.34802 | 6.104776 |
| H | 3.43614  | -5.65383 | 6.809884 |
| C | 1.975449 | -7.06975 | 6.202142 |
| H | 2.155197 | -8.15651 | 6.186224 |
| C | 0.958634 | -6.81085 | 5.090144 |
| O | -0.08517 | -7.4373  | 5.067238 |
| N | 1.318511 | -5.90761 | 4.133968 |
| H | 2.206715 | -5.40367 | 4.177995 |
| C | 0.527809 | -5.78108 | 2.934976 |
| H | -0.48433 | -6.13755 | 3.186468 |
| C | 0.442226 | -4.33952 | 2.420566 |
| H | -0.32071 | -4.31106 | 1.633501 |
| H | 1.409808 | -4.06013 | 1.984623 |
| C | 0.066687 | -3.34177 | 3.501611 |
| O | -1.1181  | -3.06431 | 3.733816 |
| N | 1.098517 | -2.77843 | 4.149213 |
| H | 2.064093 | -3.08481 | 3.982235 |
| H | 0.948659 | -1.96781 | 4.742402 |
| C | 1.011586 | -6.69934 | 1.799841 |
| O | 0.564501 | -6.53819 | 0.661058 |
| N | 1.883847 | -7.66821 | 2.136922 |
| H | 2.324714 | -7.6437  | 3.058937 |
| C | 2.336057 | -8.68435 | 1.210155 |
| H | 1.791415 | -8.54217 | 0.269078 |
| C | 3.856782 | -8.63413 | 0.953841 |
| H | 4.390575 | -8.87472 | 1.884282 |
| H | 4.09626  | -9.4134  | 0.211215 |
| C | 4.283309 | -7.28825 | 0.455871 |
| C | 3.952394 | -6.86146 | -0.8621  |
| H | 3.436651 | -7.55568 | -1.53036 |
| C | 4.243953 | -5.58991 | -1.28852 |
| H | 3.974954 | -5.23877 | -2.28584 |
| C | 4.871987 | -4.6481  | -0.38405 |
| O | 5.033904 | -3.42869 | -0.70552 |
| H | 4.556843 | -2.91864 | -2.14879 |
| C | 5.250965 | -5.111   | 0.93288  |
| H | 5.751354 | -4.40976 | 1.602643 |
| C | 4.944694 | -6.39006 | 1.329446 |
| H | 5.165697 | -6.72778 | 2.342608 |
| C | -2.33951 | 7.35893  | -4.13203 |

|   |          |          |          |
|---|----------|----------|----------|
| C | -2.28522 | 7.312562 | -2.61258 |
| C | -2.56209 | 5.949481 | -4.72605 |
| O | -1.21223 | 7.309731 | -2.00493 |
| C | -1.7093  | 4.920086 | -4.06381 |
| C | -2.05024 | 3.818448 | -3.30969 |
| N | -0.32785 | 4.986769 | -4.00238 |
| C | 0.111017 | 3.965572 | -3.24231 |
| N | -0.90653 | 3.235413 | -2.80142 |
| H | -3.13118 | 8.039729 | -4.4813  |
| H | -2.37925 | 5.985027 | -5.81313 |
| H | -3.61122 | 5.643981 | -4.59694 |
| H | -3.03614 | 3.410482 | -3.10635 |
| H | 1.159374 | 3.822644 | -3.00514 |
| H | 0.292067 | 5.755626 | -4.25957 |
| N | -3.46997 | 7.237596 | -1.97981 |
| H | -4.33076 | 7.072563 | -2.49823 |
| C | -3.60491 | 7.118502 | -0.54543 |
| H | -3.29566 | 8.033538 | -0.01747 |
| H | -2.96187 | 6.308571 | -0.15882 |
| C | -5.06403 | 6.773523 | -0.253   |
| O | -5.75811 | 6.237468 | -1.11664 |
| N | -5.51197 | 7.076949 | 0.979844 |
| H | -4.92367 | 7.64727  | 1.601044 |
| C | -6.9024  | 6.834042 | 1.323848 |
| H | -7.52742 | 7.094096 | 0.454436 |
| C | -7.18812 | 5.382782 | 1.723581 |
| H | -6.77122 | 4.71833  | 0.951003 |
| H | -6.65363 | 5.15608  | 2.660866 |
| C | -8.68247 | 5.103717 | 1.881577 |
| H | -9.1873  | 5.203763 | 0.906313 |
| H | -9.14817 | 5.861433 | 2.539053 |
| C | -8.99411 | 3.712458 | 2.43878  |
| H | -10.0765 | 3.514029 | 2.406974 |
| H | -8.50916 | 2.942306 | 1.823218 |
| N | -8.53137 | 3.562719 | 3.818841 |
| H | -8.91865 | 4.218015 | 4.4894   |
| C | -7.45852 | 2.860843 | 4.223184 |
| N | -6.92787 | 1.887005 | 3.492466 |
| H | -7.41917 | 1.402803 | 2.751106 |
| H | -6.07685 | 1.453368 | 3.896545 |
| N | -6.88891 | 3.136083 | 5.406078 |
| H | -7.08935 | 3.998996 | 5.892782 |
| H | -6.08632 | 2.564593 | 5.692642 |
| C | -5.76716 | -1.17152 | -5.12305 |
| H | -6.51267 | -1.97127 | -5.21412 |
| H | -5.89058 | -0.46616 | -5.96203 |
| N | -4.43628 | -1.74767 | -5.09146 |

|    |          |          |          |
|----|----------|----------|----------|
| H  | -4.27576 | -2.73592 | -5.39715 |
| C  | -3.34569 | -1.084   | -4.71195 |
| N  | -3.43221 | 0.157359 | -4.18635 |
| H  | -4.29973 | 0.504749 | -3.80048 |
| H  | -2.58182 | 0.61528  | -3.86712 |
| N  | -2.13729 | -1.63463 | -4.8338  |
| H  | -1.94459 | -2.46748 | -5.38594 |
| H  | -1.33417 | -1.092   | -4.50423 |
| O  | -3.50506 | 1.560105 | -1.49935 |
| C  | -3.31113 | 2.422097 | -0.62674 |
| O  | -2.14789 | 2.681246 | -0.13455 |
| C  | -4.44643 | 3.281882 | -0.1115  |
| H  | -5.31212 | 2.658453 | 0.144411 |
| H  | -4.14124 | 3.871114 | 0.760039 |
| O  | -0.28144 | 0.562732 | 0.054376 |
| O  | -0.99641 | -0.43421 | 2.412082 |
| Fe | -0.38278 | 2.063601 | -0.99481 |
| C  | -1.77747 | -2.33976 | -1.25263 |
| N  | -2.11919 | -0.8938  | -1.28744 |
| H  | -1.62824 | -0.36773 | -0.52329 |
| H  | -1.74264 | -0.44681 | -2.14381 |
| H  | -3.11894 | -0.68912 | -1.2112  |
| C  | -2.33764 | -2.99098 | 0.029698 |
| O  | -2.65555 | -2.2118  | 0.976402 |
| O  | -2.38538 | -4.23278 | 0.010509 |
| C  | -0.25367 | -2.51134 | -1.33392 |
| C  | 0.482523 | -1.82626 | -0.18666 |
| C  | 1.96222  | -2.17196 | -0.11317 |
| C  | 2.618304 | -1.46358 | 1.067954 |
| N  | 3.883222 | -2.10837 | 1.502994 |
| H  | 4.486355 | -1.48412 | 2.055143 |
| H  | 3.724831 | -2.92957 | 2.152658 |
| H  | 4.458608 | -2.43785 | 0.703964 |
| H  | -8.95749 | -0.63126 | -0.3393  |
| H  | -0.59608 | 10.81486 | 3.086612 |
| H  | 0.05096  | 10.83889 | -1.51325 |
| H  | 5.679953 | 5.656704 | -4.32824 |
| H  | 12.34405 | -1.05502 | 0.502254 |
| H  | -4.33132 | 8.463724 | 5.195499 |
| H  | -7.17121 | 7.517387 | 2.144293 |
| H  | -1.37594 | 7.768221 | -4.46679 |
| H  | -4.76825 | 3.974152 | -0.90567 |
| H  | 6.086825 | -6.08309 | 4.427336 |
| H  | 2.078507 | -9.68296 | 1.599935 |
| H  | 1.494031 | -6.83638 | 7.161649 |
| H  | -3.25286 | 0.705359 | 6.888286 |
| H  | -5.76301 | -2.75782 | 4.997075 |



|   |          |          |          |
|---|----------|----------|----------|
| H | 2.009093 | -6.38706 | -3.39844 |
| H | -0.47308 | -9.78366 | -2.19019 |
| H | -6.62662 | -4.4641  | -5.48433 |
| H | -0.80303 | 0.024423 | 1.549643 |
| H | -1.46111 | -1.25656 | 2.145597 |
| H | 2.84729  | -0.43243 | 0.795718 |
| H | 1.955767 | -1.44981 | 1.942436 |
| H | 2.486728 | -1.90204 | -1.04599 |
| H | 2.080603 | -3.26897 | -0.00704 |
| H | 0.227173 | -0.59113 | -0.14929 |
| H | 0.022577 | -2.1516  | 0.758768 |
| H | 0.09747  | -2.14146 | -2.31146 |
| H | -0.07004 | -3.60007 | -1.32576 |
| H | -2.25464 | -2.81621 | -2.12056 |
| H | -6.00429 | -0.64403 | -4.18543 |
| O | 1.609538 | 1.633941 | 1.65808  |
| H | 0.949324 | 1.129746 | 1.117919 |
| H | 1.674471 | 1.11984  | 2.501353 |
| O | -0.75646 | 2.844001 | 2.40477  |
| H | -1.37592 | 2.695009 | 1.667176 |
| H | 0.135465 | 2.617319 | 2.057047 |
| O | 3.079184 | 1.253438 | -0.62296 |
| H | 2.260368 | 1.117732 | -1.13521 |
| H | 2.784579 | 1.503945 | 0.278669 |
| O | 1.225277 | 0.17834  | 3.916518 |
| H | 0.437881 | -0.16262 | 3.432752 |
| H | 0.864213 | 0.939127 | 4.42902  |
| O | -0.11593 | 2.359721 | 4.936361 |
| H | -0.51746 | 2.56122  | 4.053894 |
| H | 0.399003 | 3.147511 | 5.157122 |
| O | 6.028973 | 5.649791 | -0.95444 |
| H | 5.631621 | 4.836359 | -1.32124 |
| H | 6.961351 | 5.407891 | -0.77186 |

<sup>5</sup>IM1<sub>C,C4</sub>

|   |          |          |          |
|---|----------|----------|----------|
| C | 6.442227 | 0.45979  | -2.66276 |
| H | 5.994359 | 0.464053 | -1.65491 |
| C | 5.380309 | 0.349048 | -3.7526  |
| H | 5.888453 | 0.270127 | -4.72569 |
| H | 4.824076 | -0.58858 | -3.63165 |
| C | 4.382983 | 1.501555 | -3.80753 |
| H | 3.977731 | 1.736987 | -2.8088  |
| H | 4.861171 | 2.432001 | -4.1429  |
| C | 3.188981 | 1.195146 | -4.71061 |
| O | 2.790928 | 0.030017 | -4.89321 |
| N | 2.613258 | 2.26353  | -5.26693 |
| H | 2.822676 | 3.214006 | -4.90226 |
| H | 1.767005 | 2.119857 | -5.80642 |
| C | 7.479717 | -0.65424 | -2.74412 |
| O | 7.725716 | -1.25006 | -3.80679 |
| N | 8.138719 | -0.92664 | -1.61062 |
| H | 7.832546 | -0.54528 | -0.70785 |
| C | 9.168184 | -1.94861 | -1.5095  |
| H | 9.708127 | -1.74501 | -0.57386 |
| C | 8.615015 | -3.3801  | -1.4902  |
| H | 8.297411 | -3.64787 | -2.51278 |
| H | 9.44226  | -4.06361 | -1.23066 |
| C | 7.440772 | -3.55749 | -0.52826 |
| H | 6.607842 | -2.90804 | -0.83262 |
| H | 7.705522 | -3.21257 | 0.483985 |
| C | 6.942696 | -5.00124 | -0.48926 |
| H | 6.899842 | -5.39941 | -1.51647 |
| H | 7.644399 | -5.64286 | 0.074336 |
| N | 5.6      | -5.08343 | 0.076952 |
| H | 5.37551  | -4.5247  | 0.921989 |
| C | 4.631765 | -5.86596 | -0.38441 |
| N | 4.893537 | -6.88169 | -1.23601 |
| H | 5.825162 | -7.27715 | -1.22999 |
| H | 4.101548 | -7.50116 | -1.46529 |
| N | 3.35194  | -5.60443 | -0.07344 |
| H | 3.145513 | -4.78511 | 0.515194 |
| H | 2.663775 | -6.3581  | -0.08387 |
| C | 3.413516 | -6.53065 | -5.06072 |
| H | 4.443343 | -6.90566 | -5.16028 |
| C | 3.375973 | -5.32525 | -4.09901 |
| H | 2.318476 | -5.04402 | -3.97791 |
| H | 3.742714 | -5.65322 | -3.11571 |
| C | 4.178096 | -4.15619 | -4.56532 |
| N | 3.750239 | -3.33183 | -5.58915 |
| C | 4.710102 | -2.43467 | -5.77043 |

|   |          |          |          |
|---|----------|----------|----------|
| H | 4.67164  | -1.60095 | -6.46759 |
| N | 5.742241 | -2.64889 | -4.92683 |
| H | 6.564721 | -2.03472 | -4.73727 |
| C | 5.421634 | -3.73072 | -4.14284 |
| H | 6.089981 | -4.09483 | -3.36863 |
| C | 2.46603  | -7.58336 | -4.52952 |
| O | 1.256101 | -7.38603 | -4.45428 |
| N | 3.029016 | -8.7201  | -4.04155 |
| H | 4.034722 | -8.83185 | -4.07447 |
| C | 2.244194 | -9.6483  | -3.2535  |
| H | 1.377122 | -9.96788 | -3.85381 |
| C | 3.083234 | -10.8629 | -2.85886 |
| H | 2.478014 | -11.5754 | -2.2813  |
| H | 3.935627 | -10.5576 | -2.23176 |
| H | 3.462553 | -11.3779 | -3.75387 |
| C | 1.728309 | -8.92654 | -1.99454 |
| O | 2.465305 | -8.16565 | -1.36053 |
| N | 0.477799 | -9.22912 | -1.62059 |
| H | -0.08167 | -9.76888 | -2.27216 |
| C | -0.20445 | -8.62334 | -0.48685 |
| H | 0.555395 | -8.17814 | 0.169419 |
| C | -1.21884 | -7.54729 | -0.90948 |
| H | -1.93692 | -8.01783 | -1.60895 |
| C | -1.98947 | -7.07835 | 0.328738 |
| H | -2.54765 | -7.91657 | 0.783644 |
| H | -1.27134 | -6.67987 | 1.061609 |
| H | -2.70922 | -6.28758 | 0.072229 |
| C | -0.54299 | -6.37493 | -1.62638 |
| H | 0.034589 | -6.71784 | -2.49734 |
| H | 0.126111 | -5.84698 | -0.93018 |
| H | -1.29669 | -5.65948 | -1.98522 |
| C | -0.02206 | -2.71041 | 5.780035 |
| H | -0.75637 | -1.88892 | 5.829364 |
| C | 1.390618 | -2.11443 | 5.74026  |
| H | 1.405004 | -1.32643 | 4.96811  |
| C | 1.748587 | -1.51365 | 7.098452 |
| H | 2.769618 | -1.09988 | 7.096616 |
| H | 1.721029 | -2.29223 | 7.876053 |
| H | 1.052102 | -0.70774 | 7.379508 |
| O | 2.315722 | -3.13036 | 5.375889 |
| H | 3.147975 | -2.70371 | 5.058895 |
| C | -0.38853 | -3.59878 | 4.613596 |
| O | -1.12225 | -4.59693 | 4.796342 |
| N | 0.101781 | -3.29136 | 3.413881 |
| H | 0.711545 | -2.4582  | 3.281684 |
| C | 0.069319 | -4.2101  | 2.303261 |
| H | -0.91703 | -4.67757 | 2.192196 |

|   |          |          |          |
|---|----------|----------|----------|
| H | 0.256006 | -3.66305 | 1.370552 |
| C | 1.13067  | -5.31272 | 2.358335 |
| O | 1.069113 | -6.24598 | 1.549504 |
| N | 2.105191 | -5.14781 | 3.265257 |
| H | 2.060518 | -4.35309 | 3.913888 |
| C | 3.269904 | -6.00571 | 3.37147  |
| H | 3.343852 | -6.58973 | 2.444315 |
| C | 4.550028 | -5.20459 | 3.62214  |
| H | 4.481808 | -4.6984  | 4.599421 |
| H | 5.388797 | -5.92163 | 3.692407 |
| O | 4.805999 | -4.25626 | 2.608286 |
| H | 4.77003  | -3.35407 | 2.993842 |
| C | -6.13388 | -2.62144 | 5.306084 |
| H | -5.85524 | -1.66685 | 5.776814 |
| C | -4.99523 | -3.16064 | 4.436457 |
| H | -5.24787 | -4.18498 | 4.121849 |
| H | -4.0872  | -3.24608 | 5.057158 |
| C | -4.66812 | -2.32756 | 3.185793 |
| H | -5.5359  | -2.405   | 2.505586 |
| C | -4.46766 | -0.8454  | 3.521872 |
| H | -5.4156  | -0.35918 | 3.794619 |
| H | -4.06605 | -0.30021 | 2.657201 |
| H | -3.7504  | -0.72282 | 4.348832 |
| C | -3.45032 | -2.92098 | 2.471956 |
| H | -3.27044 | -2.43992 | 1.501007 |
| H | -3.58897 | -3.99967 | 2.29261  |
| H | -2.54293 | -2.78863 | 3.076897 |
| C | -7.43694 | -2.4767  | 4.540725 |
| O | -7.84871 | -3.35233 | 3.781394 |
| N | -8.14296 | -1.34312 | 4.781374 |
| H | -7.71102 | -0.61142 | 5.332262 |
| C | -9.36395 | -1.04459 | 4.083999 |
| H | -9.87919 | -1.99462 | 3.873015 |
| C | -9.119   | -0.34702 | 2.741016 |
| O | -8.01451 | -0.38438 | 2.199614 |
| N | -10.1977 | 0.229916 | 2.182669 |
| H | -11.0223 | 0.37619  | 2.752633 |
| C | -10.1058 | 0.909816 | 0.905028 |
| H | -9.73436 | 0.219117 | 0.137304 |
| C | -9.19644 | 2.14353  | 0.99346  |
| O | -9.16303 | 2.838965 | 1.995908 |
| N | -8.46259 | 2.379116 | -0.12166 |
| C | -7.54897 | 3.498837 | -0.18833 |
| C | -7.109   | 3.679081 | -1.63921 |
| C | -6.31518 | 3.317022 | 0.752474 |
| O | -7.13318 | 2.735382 | -2.43526 |
| C | -5.52354 | 2.077969 | 0.498252 |

|   |          |          |          |
|---|----------|----------|----------|
| C | -4.24271 | 1.893659 | 0.02382  |
| N | -6.02888 | 0.799967 | 0.693908 |
| C | -5.09998 | -0.09357 | 0.337969 |
| N | -3.99394 | 0.532963 | -0.06852 |
| H | -8.38981 | 1.668413 | -0.85367 |
| H | -8.06662 | 4.406023 | 0.15924  |
| H | -5.66448 | 4.196769 | 0.665264 |
| H | -6.72122 | 3.308808 | 1.77513  |
| H | -3.50892 | 2.640311 | -0.26065 |
| H | -5.23067 | -1.16999 | 0.358365 |
| H | -6.94054 | 0.528375 | 1.091515 |
| N | -6.65188 | 4.900005 | -1.97267 |
| H | -6.46588 | 5.598558 | -1.23561 |
| C | -5.87061 | 5.055162 | -3.17844 |
| H | -6.35153 | 4.528231 | -4.01318 |
| C | -4.44766 | 4.53913  | -2.9401  |
| O | -3.93509 | 4.634695 | -1.8219  |
| N | -3.79441 | 3.975429 | -3.97957 |
| C | -2.41358 | 3.526967 | -3.79765 |
| C | -1.45994 | 4.730779 | -3.92765 |
| C | -2.00222 | 2.392574 | -4.73347 |
| O | -1.10378 | 5.150717 | -5.01686 |
| C | -0.81442 | 1.585072 | -4.15511 |
| C | -1.24311 | 0.7464   | -2.98046 |
| O | -1.08233 | -0.5113  | -2.9356  |
| O | -1.86458 | 1.2909   | -2.01033 |
| H | -4.19224 | 4.019399 | -4.91213 |
| H | -2.37245 | 3.162039 | -2.76976 |
| H | -2.85756 | 1.720594 | -4.90712 |
| H | -1.70459 | 2.822225 | -5.70228 |
| H | -0.01838 | 2.275908 | -3.82051 |
| H | -0.38568 | 0.919658 | -4.91632 |
| N | -1.13875 | 5.242559 | -2.7191  |
| H | -1.42254 | 4.704027 | -1.90322 |
| C | -0.09723 | 6.208728 | -2.42074 |
| H | 0.225054 | 5.961278 | -1.39632 |
| C | 1.130012 | 6.109189 | -3.32419 |
| H | 0.871039 | 6.336083 | -4.36758 |
| H | 1.872027 | 6.855677 | -3.00949 |
| C | 1.801884 | 4.730093 | -3.31582 |
| O | 2.918979 | 4.657131 | -3.90999 |
| O | 1.248589 | 3.751525 | -2.74436 |
| C | -0.68028 | 7.616859 | -2.25949 |
| O | 0.023986 | 8.595546 | -2.01271 |
| N | -2.03133 | 7.66187  | -2.29354 |
| H | -2.51103 | 6.772819 | -2.3909  |
| C | -2.82224 | 8.85769  | -2.0541  |

|   |          |          |          |
|---|----------|----------|----------|
| H | -2.24956 | 9.703907 | -2.46604 |
| C | -4.17315 | 8.7475   | -2.74428 |
| H | -4.75394 | 9.668726 | -2.60486 |
| H | -4.75946 | 7.927254 | -2.30508 |
| H | -4.03371 | 8.571445 | -3.82102 |
| C | -2.97553 | 9.114792 | -0.53423 |
| O | -4.06518 | 9.052225 | 0.035065 |
| N | -1.81378 | 9.426823 | 0.070884 |
| H | -0.96918 | 9.267074 | -0.48397 |
| C | -1.68045 | 9.87194  | 1.45342  |
| H | -2.31694 | 10.76775 | 1.574916 |
| C | -2.1595  | 8.857975 | 2.513166 |
| H | -3.24989 | 8.783153 | 2.416995 |
| H | -1.93129 | 9.315815 | 3.48576  |
| C | -1.55141 | 7.476091 | 2.44315  |
| C | -2.28938 | 6.403585 | 1.914282 |
| H | -3.29566 | 6.585809 | 1.529245 |
| C | -1.76898 | 5.106865 | 1.90982  |
| H | -2.35844 | 4.275486 | 1.519349 |
| C | -0.48983 | 4.866429 | 2.419248 |
| H | -0.08034 | 3.855179 | 2.430934 |
| C | 0.265399 | 5.926129 | 2.925906 |
| H | 1.270959 | 5.737701 | 3.306749 |
| C | -0.26515 | 7.218607 | 2.945862 |
| H | 0.311421 | 8.042317 | 3.366237 |
| C | -0.23105 | 10.3328  | 1.732173 |
| O | 0.213673 | 10.31261 | 2.869147 |
| N | 0.486583 | 10.75965 | 0.660202 |
| H | 0.05344  | 10.77817 | -0.25414 |
| C | 1.932018 | 10.93923 | 0.699602 |
| H | 2.206474 | 11.10849 | 1.74878  |
| C | 2.67092  | 9.732505 | 0.106038 |
| H | 2.331365 | 9.595942 | -0.93493 |
| H | 3.748586 | 9.97197  | 0.060376 |
| C | 2.470786 | 8.412527 | 0.867074 |
| H | 1.384445 | 8.247837 | 0.973404 |
| C | 3.016114 | 7.231632 | 0.063622 |
| H | 2.55464  | 7.176478 | -0.93315 |
| H | 4.107272 | 7.301258 | -0.07732 |
| H | 2.813896 | 6.290008 | 0.593389 |
| C | 3.082162 | 8.445128 | 2.271257 |
| H | 2.594575 | 9.195327 | 2.910605 |
| H | 2.981197 | 7.464294 | 2.76107  |
| H | 4.160053 | 8.678003 | 2.220251 |
| C | 5.851338 | 4.474475 | 4.447569 |
| H | 5.4761   | 5.004929 | 5.336664 |
| C | 4.946887 | 3.290688 | 4.083614 |

|   |          |          |          |
|---|----------|----------|----------|
| H | 5.500897 | 2.674752 | 3.355532 |
| H | 4.785613 | 2.661138 | 4.969908 |
| C | 3.590921 | 3.452488 | 3.399994 |
| O | 3.347508 | 4.43384  | 2.676359 |
| O | 2.850354 | 2.426055 | 3.549442 |
| C | 7.208906 | 3.822171 | 4.680014 |
| O | 8.058492 | 3.738778 | 3.797253 |
| N | 7.341361 | 3.117256 | 5.840563 |
| H | 6.655488 | 3.238072 | 6.576001 |
| C | 8.394669 | 2.130461 | 5.998607 |
| H | 9.387033 | 2.579767 | 5.849484 |
| C | 8.326276 | 0.9521   | 5.004547 |
| O | 9.297873 | 0.255599 | 4.79251  |
| N | 7.129191 | 0.781785 | 4.367358 |
| H | 6.34612  | 1.354442 | 4.648672 |
| C | 6.95095  | -0.13618 | 3.260872 |
| H | 7.315696 | -1.13513 | 3.547811 |
| C | 5.468611 | -0.24549 | 2.852673 |
| H | 5.400486 | -0.92074 | 1.987945 |
| H | 5.094475 | 0.741408 | 2.539843 |
| C | 4.589318 | -0.80278 | 3.951575 |
| O | 4.58543  | -2.0176  | 4.222445 |
| N | 3.864498 | 0.090951 | 4.644564 |
| H | 3.581716 | 1.002505 | 4.232428 |
| H | 3.227525 | -0.2832  | 5.338104 |
| C | 7.771483 | 0.219413 | 2.001803 |
| O | 7.823338 | -0.62385 | 1.102094 |
| N | 8.360557 | 1.422245 | 1.934579 |
| H | 8.29757  | 2.066644 | 2.723511 |
| C | 9.291972 | 1.777844 | 0.870534 |
| H | 9.060926 | 1.153589 | -0.00182 |
| C | 9.233876 | 3.263104 | 0.488048 |
| H | 9.454239 | 3.871188 | 1.379971 |
| H | 10.04821 | 3.445387 | -0.23069 |
| C | 7.911364 | 3.683633 | -0.10383 |
| C | 7.683394 | 3.708106 | -1.4855  |
| H | 8.502378 | 3.471938 | -2.17152 |
| C | 6.429709 | 4.038453 | -2.01442 |
| H | 6.274394 | 4.067413 | -3.0953  |
| C | 5.370983 | 4.345311 | -1.15148 |
| O | 4.112358 | 4.616407 | -1.58225 |
| H | 3.955247 | 4.603025 | -2.56506 |
| C | 5.595974 | 4.371641 | 0.233312 |
| H | 4.800187 | 4.671052 | 0.914813 |
| C | 6.848597 | 4.041315 | 0.739228 |
| H | 7.027338 | 4.082137 | 1.813412 |
| C | -8.51056 | -1.20825 | -3.51409 |

|   |          |          |          |
|---|----------|----------|----------|
| C | -8.27785 | -1.31873 | -2.01403 |
| C | -7.24186 | -1.50399 | -4.3443  |
| O | -8.20852 | -0.3194  | -1.29544 |
| C | -6.02475 | -0.82742 | -3.80421 |
| C | -4.79928 | -1.33481 | -3.43582 |
| N | -5.97244 | 0.515786 | -3.47458 |
| C | -4.7734  | 0.773135 | -2.92474 |
| N | -4.03349 | -0.32898 | -2.87535 |
| H | -9.31839 | -1.88723 | -3.82983 |
| H | -7.43248 | -1.20645 | -5.38947 |
| H | -7.03951 | -2.58536 | -4.36485 |
| H | -4.42701 | -2.34775 | -3.55133 |
| H | -4.50087 | 1.742681 | -2.52576 |
| H | -6.72584 | 1.20784  | -3.41516 |
| N | -8.11817 | -2.55983 | -1.51592 |
| H | -8.15718 | -3.39785 | -2.09544 |
| C | -7.90028 | -2.81799 | -0.11421 |
| H | -8.75753 | -2.49441 | 0.498905 |
| H | -7.03805 | -2.25068 | 0.268694 |
| C | -7.66336 | -4.31794 | 0.064868 |
| O | -7.59612 | -5.05628 | -0.91459 |
| N | -7.53536 | -4.72536 | 1.342153 |
| H | -7.66069 | -4.06216 | 2.113657 |
| C | -7.44066 | -6.12606 | 1.703216 |
| H | -7.68237 | -6.7172  | 0.808263 |
| C | -6.06879 | -6.53054 | 2.250429 |
| H | -5.30514 | -6.39748 | 1.464275 |
| H | -5.80117 | -5.84532 | 3.071077 |
| C | -6.07449 | -7.97362 | 2.75317  |
| H | -6.31865 | -8.66177 | 1.925977 |
| H | -6.88334 | -8.09977 | 3.495124 |
| C | -4.7614  | -8.44703 | 3.377709 |
| H | -4.84369 | -9.50536 | 3.669307 |
| H | -3.94273 | -8.4034  | 2.645379 |
| N | -4.36806 | -7.69027 | 4.564477 |
| H | -4.91046 | -7.85382 | 5.404887 |
| C | -3.42076 | -6.7388  | 4.630109 |
| N | -2.68624 | -6.39796 | 3.576135 |
| H | -2.79189 | -6.84203 | 2.676044 |
| H | -1.93898 | -5.69724 | 3.744704 |
| N | -3.19151 | -6.09938 | 5.784779 |
| H | -3.65129 | -6.37826 | 6.640239 |
| H | -2.41522 | -5.42289 | 5.802472 |
| C | 0.573223 | -4.78997 | -6.7008  |
| H | 1.284201 | -5.00276 | -7.50939 |
| H | -0.40946 | -4.60636 | -7.16442 |
| N | 1.039476 | -3.61259 | -5.98855 |



|    |          |          |          |
|----|----------|----------|----------|
| H  | 2.074023 | -3.39532 | -6.0144  |
| C  | 0.339978 | -3.0282  | -5.02543 |
| N  | -0.8733  | -3.47808 | -4.67559 |
| H  | -1.17896 | -4.38609 | -5.00021 |
| H  | -1.38086 | -3.11025 | -3.86808 |
| N  | 0.870669 | -1.98139 | -4.34538 |
| H  | 1.609408 | -1.40802 | -4.78188 |
| H  | 0.195176 | -1.42049 | -3.80168 |
| O  | -2.48286 | -3.63439 | -2.37659 |
| C  | -3.33853 | -3.37814 | -1.51402 |
| O  | -3.3848  | -2.2557  | -0.88424 |
| C  | -4.41427 | -4.36842 | -1.15195 |
| H  | -4.18939 | -5.36506 | -1.54876 |
| H  | -4.54877 | -4.40464 | -0.06192 |
| O  | -1.13929 | -0.69652 | 0.033845 |
| O  | -0.25825 | -3.13044 | -0.74    |
| Fe | -2.59457 | -0.48601 | -1.21263 |
| C  | 3.288039 | -2.16777 | -1.4629  |
| N  | 2.165086 | -3.06217 | -1.86399 |
| H  | 1.289517 | -2.9693  | -1.26541 |
| H  | 1.872097 | -2.86005 | -2.83754 |
| H  | 2.446571 | -4.04594 | -1.77298 |
| C  | 3.656175 | -2.39775 | 0.011959 |
| O  | 2.753678 | -2.95222 | 0.716728 |
| O  | 4.751044 | -1.95967 | 0.36855  |
| C  | 2.939761 | -0.69316 | -1.65176 |
| C  | 1.952609 | -0.11474 | -0.69712 |
| C  | 1.69375  | 1.352706 | -0.70486 |
| C  | 2.69142  | 2.143417 | 0.164238 |
| N  | 2.314781 | 3.5828   | 0.275845 |
| H  | 1.284338 | 3.733463 | 0.140702 |
| H  | 2.597715 | 3.974619 | 1.214509 |
| H  | 2.808635 | 4.120684 | -0.4663  |
| H  | -0.71297 | -9.4233  | 0.077068 |
| H  | -10.0237 | -0.43538 | 4.720547 |
| H  | -11.1134 | 1.243612 | 0.618039 |
| H  | -5.80738 | 6.12488  | -3.43007 |
| H  | 2.189277 | 11.85217 | 0.139616 |
| H  | -6.33229 | -3.32828 | 6.1303   |
| H  | -8.20903 | -6.34024 | 2.465403 |
| H  | -8.85644 | -0.18096 | -3.69437 |
| H  | -5.3727  | -4.03711 | -1.57903 |
| H  | 5.929195 | 5.190547 | 3.620381 |
| H  | 10.31747 | 1.523118 | 1.19266  |
| H  | 8.362434 | 1.731808 | 7.022677 |
| H  | -0.15227 | -3.32542 | 6.682685 |
| H  | 3.149734 | -6.7291  | 4.199258 |

|   |          |          |          |
|---|----------|----------|----------|
| H | 6.982765 | 1.416222 | -2.74391 |
| H | 9.871239 | -1.83818 | -2.34823 |
| H | 3.076212 | -6.21799 | -6.05909 |
| H | -0.63897 | -2.32605 | -0.31358 |
| H | -0.92429 | -3.38521 | -1.40851 |
| H | 2.719245 | 1.726404 | 1.174187 |
| H | 3.707784 | 2.096468 | -0.25117 |
| H | 0.695712 | 1.544761 | -0.29452 |
| H | 1.716169 | 1.764821 | -1.72607 |
| H | -0.27488 | -0.42139 | -0.32507 |
| H | 1.69549  | -0.67986 | 0.202182 |
| H | 2.65726  | -0.4939  | -2.69892 |
| H | 3.899928 | -0.16472 | -1.51641 |
| H | 4.138701 | -2.4217  | -2.10889 |
| H | 0.516425 | -5.67832 | -6.04617 |
| O | -1.33615 | 1.899477 | 1.07872  |
| H | -1.40775 | 1.007541 | 0.689536 |
| H | -0.50295 | 1.823953 | 1.601486 |
| O | -1.27834 | -0.40606 | 3.044526 |
| H | -1.15056 | -0.75466 | 2.140561 |
| H | -1.90454 | 0.319518 | 2.896424 |
| O | -0.31384 | 3.796919 | -0.5503  |
| H | 0.09032  | 3.549398 | -1.41319 |
| H | -0.79708 | 3.042508 | -0.14097 |
| O | 1.899539 | -1.4114  | 2.695826 |
| H | 2.341252 | -1.94472 | 1.986526 |
| H | 1.7064   | -0.50862 | 2.376307 |
| O | 0.866516 | 1.179231 | 2.469217 |
| H | 0.267938 | 0.733122 | 3.098253 |
| H | 1.518904 | 1.763575 | 2.956463 |
| O | -5.3153  | 6.540025 | -0.1902  |
| H | -4.54357 | 6.060629 | -0.53901 |
| H | -5.01896 | 7.464699 | -0.0405  |

<sup>5</sup>Pr<sub>C,C4</sub>

|   |          |          |          |
|---|----------|----------|----------|
| C | 5.468013 | 3.971367 | -2.76835 |
| H | 4.993729 | 3.774045 | -1.7913  |
| C | 4.638203 | 3.404493 | -3.91569 |
| H | 5.153058 | 3.603414 | -4.86747 |
| H | 4.608116 | 2.315219 | -3.81773 |
| C | 3.200858 | 3.911647 | -3.98118 |
| H | 2.771275 | 4.011818 | -2.96974 |
| H | 3.148678 | 4.923763 | -4.40921 |
| C | 2.270357 | 2.992449 | -4.7728  |
| O | 2.610123 | 1.848704 | -5.11576 |
| N | 1.054368 | 3.486297 | -5.03312 |
| H | 0.676286 | 4.370325 | -4.64748 |
| H | 0.393801 | 2.860224 | -5.47956 |
| C | 6.889036 | 3.41539  | -2.75258 |
| O | 7.396202 | 2.883785 | -3.75465 |
| N | 7.565494 | 3.571621 | -1.60666 |
| H | 7.085972 | 3.840227 | -0.739   |
| C | 8.956427 | 3.184273 | -1.43267 |
| H | 9.28905  | 3.665721 | -0.50197 |
| C | 9.190073 | 1.671436 | -1.3465  |
| H | 9.072126 | 1.240348 | -2.35452 |
| H | 10.243   | 1.509583 | -1.05554 |
| C | 8.248429 | 0.956934 | -0.37856 |
| H | 7.209895 | 1.054684 | -0.72567 |
| H | 8.260438 | 1.441449 | 0.611058 |
| C | 8.591958 | -0.52733 | -0.2533  |
| H | 8.820619 | -0.93378 | -1.25214 |
| H | 9.497937 | -0.66397 | 0.366362 |
| N | 7.470851 | -1.28935 | 0.285346 |
| H | 6.932459 | -0.89994 | 1.081385 |
| C | 7.175604 | -2.53948 | -0.05873 |
| N | 8.062518 | -3.32037 | -0.70309 |
| H | 9.046014 | -3.09524 | -0.62865 |
| H | 7.782588 | -4.29439 | -0.89753 |
| N | 5.940429 | -3.01584 | 0.17257  |
| H | 5.250958 | -2.39242 | 0.620932 |
| H | 5.788268 | -4.02335 | 0.218126 |
| C | 6.727335 | -4.13597 | -4.91393 |
| H | 7.699637 | -4.0088  | -5.41502 |
| C | 6.56768  | -3.10538 | -3.77321 |
| H | 5.71463  | -3.43283 | -3.15571 |
| H | 7.444288 | -3.14838 | -3.1138  |
| C | 6.343562 | -1.69219 | -4.19426 |
| N | 5.130269 | -1.26491 | -4.7084  |

|   |          |          |          |
|---|----------|----------|----------|
| C | 5.262608 | 0.044926 | -4.92208 |
| H | 4.479857 | 0.7247   | -5.26638 |
| N | 6.495544 | 0.473388 | -4.57219 |
| H | 6.816856 | 1.464011 | -4.49021 |
| C | 7.196086 | -0.61077 | -4.10141 |
| H | 8.219873 | -0.52457 | -3.7492  |
| C | 6.569636 | -5.50691 | -4.28908 |
| O | 5.489588 | -6.08608 | -4.2376  |
| N | 7.660711 | -5.99285 | -3.63304 |
| H | 8.539075 | -5.49019 | -3.67469 |
| C | 7.536436 | -7.11384 | -2.71597 |
| H | 7.121872 | -7.97147 | -3.26951 |
| C | 8.896561 | -7.48513 | -2.13424 |
| H | 8.802642 | -8.35074 | -1.46349 |
| H | 9.31028  | -6.6485  | -1.55029 |
| H | 9.601018 | -7.74748 | -2.93746 |
| C | 6.556327 | -6.72727 | -1.58964 |
| O | 6.780294 | -5.74693 | -0.86943 |
| N | 5.491798 | -7.52772 | -1.44842 |
| H | 5.324405 | -8.17763 | -2.20933 |
| C | 4.372756 | -7.27081 | -0.55181 |
| H | 4.73575  | -6.66246 | 0.288842 |
| C | 3.20733  | -6.55541 | -1.25773 |
| H | 3.021717 | -7.08886 | -2.20851 |
| C | 1.932716 | -6.6291  | -0.41411 |
| H | 1.627192 | -7.67304 | -0.23352 |
| H | 2.088016 | -6.12717 | 0.553438 |
| H | 1.105178 | -6.11916 | -0.92694 |
| C | 3.567162 | -5.10562 | -1.58126 |
| H | 4.480105 | -5.05265 | -2.18694 |
| H | 3.705896 | -4.54225 | -0.64954 |
| H | 2.760872 | -4.62922 | -2.14757 |
| C | 1.44208  | -2.09541 | 5.787534 |
| H | 0.374795 | -1.82596 | 5.86379  |
| C | 2.284277 | -0.81814 | 5.71207  |
| H | 1.848066 | -0.17051 | 4.929805 |
| C | 2.270172 | -0.08789 | 7.053087 |
| H | 2.894371 | 0.819082 | 7.02121  |
| H | 2.684426 | -0.73645 | 7.839763 |
| H | 1.248648 | 0.208426 | 7.339095 |
| O | 3.605286 | -1.17519 | 5.334825 |
| H | 4.093833 | -0.36388 | 5.046216 |
| C | 1.620559 | -3.04104 | 4.622933 |
| O | 1.624721 | -4.27244 | 4.810622 |
| N | 1.771257 | -2.5198  | 3.39151  |
| H | 1.933557 | -1.49471 | 3.24595  |
| C | 2.255528 | -3.34139 | 2.298534 |

|   |          |          |          |
|---|----------|----------|----------|
| H | 1.62528  | -4.22646 | 2.149    |
| H | 2.203828 | -2.7658  | 1.362107 |
| C | 3.709666 | -3.79713 | 2.462794 |
| O | 4.12807  | -4.757   | 1.800797 |
| N | 4.453129 | -3.06439 | 3.302519 |
| H | 4.005153 | -2.32788 | 3.858852 |
| C | 5.878429 | -3.22851 | 3.513288 |
| H | 6.302949 | -3.71949 | 2.628013 |
| C | 6.551589 | -1.87847 | 3.782175 |
| H | 6.199648 | -1.48565 | 4.750369 |
| H | 7.638469 | -2.05446 | 3.884311 |
| O | 6.296991 | -0.93715 | 2.761529 |
| H | 5.833696 | -0.15753 | 3.142195 |
| C | -3.72735 | -5.81064 | 5.206952 |
| H | -3.90385 | -4.87696 | 5.761078 |
| C | -2.50321 | -5.68739 | 4.300213 |
| H | -2.28646 | -6.6755  | 3.865313 |
| H | -1.63413 | -5.42777 | 4.930049 |
| C | -2.60738 | -4.65586 | 3.161378 |
| H | -3.31704 | -5.05825 | 2.416104 |
| C | -3.14745 | -3.30509 | 3.642051 |
| H | -4.21801 | -3.3653  | 3.888267 |
| H | -3.01699 | -2.52796 | 2.877741 |
| H | -2.59954 | -2.95291 | 4.532805 |
| C | -1.23938 | -4.51137 | 2.488873 |
| H | -1.2727  | -3.82212 | 1.632719 |
| H | -0.86058 | -5.4828  | 2.13349  |
| H | -0.50521 | -4.12172 | 3.208824 |
| C | -4.98521 | -6.23043 | 4.469718 |
| O | -4.98262 | -7.08022 | 3.578745 |
| N | -6.13607 | -5.65859 | 4.894759 |
| H | -6.08626 | -4.88188 | 5.54181  |
| C | -7.39175 | -5.95011 | 4.259406 |
| H | -7.49354 | -7.03925 | 4.133197 |
| C | -7.51994 | -5.29455 | 2.878229 |
| O | -6.63081 | -4.58145 | 2.419514 |
| N | -8.6543  | -5.59306 | 2.219533 |
| H | -9.3948  | -6.06895 | 2.721048 |
| C | -8.96213 | -4.98391 | 0.941462 |
| H | -8.20037 | -5.25535 | 0.200241 |
| C | -9.05768 | -3.45822 | 1.064889 |
| O | -9.53147 | -2.92524 | 2.05521  |
| N | -8.58392 | -2.77997 | -0.00881 |
| C | -8.58586 | -1.33487 | -0.02424 |
| C | -8.34342 | -0.86067 | -1.45559 |
| C | -7.52491 | -0.73326 | 0.951419 |
| O | -7.82249 | -1.59403 | -2.30046 |

|   |          |          |          |
|---|----------|----------|----------|
| C | -6.13221 | -1.17227 | 0.650229 |
| C | -5.07873 | -0.51976 | 0.042706 |
| N | -5.67343 | -2.45433 | 0.891918 |
| C | -4.41277 | -2.5529  | 0.432892 |
| N | -4.01532 | -1.39557 | -0.08852 |
| H | -8.04136 | -3.26406 | -0.72622 |
| H | -9.56698 | -0.97808 | 0.325239 |
| H | -7.58871 | 0.363461 | 0.926671 |
| H | -7.82486 | -1.0562  | 1.959204 |
| H | -5.04611 | 0.506047 | -0.31571 |
| H | -3.81685 | -3.45956 | 0.475745 |
| H | -6.18429 | -3.22531 | 1.348294 |
| N | -8.68952 | 0.416323 | -1.71371 |
| H | -8.94692 | 1.05263  | -0.94473 |
| C | -8.23612 | 1.055155 | -2.9287  |
| H | -8.35141 | 0.367578 | -3.77685 |
| C | -6.78412 | 1.510546 | -2.77577 |
| O | -6.39227 | 2.026207 | -1.72117 |
| N | -5.94679 | 1.308892 | -3.80721 |
| C | -4.54578 | 1.704539 | -3.70003 |
| C | -4.43871 | 3.241389 | -3.65658 |
| C | -3.72447 | 1.156411 | -4.8639  |
| O | -4.79764 | 3.921842 | -4.60518 |
| C | -2.21888 | 1.418884 | -4.72326 |
| C | -1.49784 | 0.589305 | -3.68301 |
| O | -0.30985 | 0.243453 | -3.88833 |
| O | -2.11961 | 0.294112 | -2.60697 |
| H | -6.30504 | 0.960945 | -4.68962 |
| H | -4.16691 | 1.287388 | -2.76103 |
| H | -3.90585 | 0.074085 | -4.96207 |
| H | -4.0769  | 1.649168 | -5.784   |
| H | -2.02697 | 2.468409 | -4.43594 |
| H | -1.71161 | 1.257246 | -5.68445 |
| N | -3.9348  | 3.704399 | -2.49604 |
| H | -3.64526 | 3.036879 | -1.78502 |
| C | -3.62265 | 5.08885  | -2.20194 |
| H | -3.10352 | 5.074928 | -1.22993 |
| C | -2.69116 | 5.735677 | -3.23444 |
| H | -3.152   | 5.688368 | -4.23275 |
| H | -2.56243 | 6.801015 | -3.00186 |
| C | -1.30561 | 5.086931 | -3.32302 |
| O | -0.42117 | 5.695098 | -3.98359 |
| O | -1.09174 | 3.979672 | -2.74558 |
| C | -4.89645 | 5.901063 | -1.92662 |
| O | -4.8543  | 7.113768 | -1.72019 |
| N | -6.03708 | 5.18062  | -1.85786 |
| H | -5.97603 | 4.166625 | -1.88864 |

|   |          |          |          |
|---|----------|----------|----------|
| C | -7.34697 | 5.784436 | -1.66748 |
| H | -7.28003 | 6.800854 | -2.08578 |
| C | -8.42283 | 4.988846 | -2.3906  |
| H | -9.38948 | 5.506882 | -2.32871 |
| H | -8.55252 | 4.002891 | -1.92521 |
| H | -8.14597 | 4.867277 | -3.448   |
| C | -7.6414  | 5.934828 | -0.15853 |
| O | -8.52548 | 5.299148 | 0.41359  |
| N | -6.82006 | 6.818071 | 0.445274 |
| H | -6.02775 | 7.13374  | -0.12026 |
| C | -6.83348 | 7.128342 | 1.869391 |
| H | -7.83553 | 7.519302 | 2.122009 |
| C | -6.58857 | 5.903807 | 2.778365 |
| H | -7.46941 | 5.25503  | 2.692733 |
| H | -6.53749 | 6.288191 | 3.805654 |
| C | -5.34114 | 5.120752 | 2.448764 |
| C | -5.40588 | 4.004778 | 1.597914 |
| H | -6.37361 | 3.693934 | 1.200811 |
| C | -4.25721 | 3.272249 | 1.290633 |
| H | -4.32042 | 2.404121 | 0.633636 |
| C | -3.02291 | 3.639585 | 1.83549  |
| H | -2.13543 | 3.045462 | 1.617495 |
| C | -2.94374 | 4.753342 | 2.67449  |
| H | -1.97721 | 5.054362 | 3.080827 |
| C | -4.09295 | 5.487828 | 2.976778 |
| H | -4.03263 | 6.361909 | 3.625838 |
| C | -5.82228 | 8.25405  | 2.182288 |
| O | -5.33477 | 8.354361 | 3.297592 |
| N | -5.52508 | 9.097051 | 1.159677 |
| H | -5.99091 | 8.976917 | 0.26918  |
| C | -4.39299 | 10.01331 | 1.193328 |
| H | -4.15696 | 10.19143 | 2.250292 |
| C | -3.18402 | 9.457004 | 0.429346 |
| H | -3.48927 | 9.265474 | -0.61366 |
| H | -2.4063  | 10.24116 | 0.392943 |
| C | -2.58536 | 8.167175 | 1.011889 |
| H | -3.40218 | 7.430278 | 1.102431 |
| C | -1.55264 | 7.565622 | 0.057352 |
| H | -1.97698 | 7.411381 | -0.94501 |
| H | -0.67049 | 8.217747 | -0.05141 |
| H | -1.19902 | 6.597728 | 0.440896 |
| C | -1.98279 | 8.376473 | 2.405068 |
| H | -2.74847 | 8.663134 | 3.140688 |
| H | -1.49595 | 7.454693 | 2.757639 |
| H | -1.21124 | 9.166002 | 2.378052 |
| C | 2.23214  | 6.853531 | 4.212699 |
| H | 1.586291 | 7.099846 | 5.069722 |

|   |          |          |          |
|---|----------|----------|----------|
| C | 2.1821   | 5.354624 | 3.88785  |
| H | 3.067754 | 5.130168 | 3.271465 |
| H | 2.289663 | 4.761554 | 4.806489 |
| C | 1.066767 | 4.73071  | 3.052907 |
| O | 0.345257 | 5.433855 | 2.32259  |
| O | 1.068352 | 3.456471 | 3.07893  |
| C | 3.707427 | 7.1159   | 4.492065 |
| O | 4.477044 | 7.530308 | 3.62954  |
| N | 4.190158 | 6.640021 | 5.675957 |
| H | 3.542978 | 6.358409 | 6.402389 |
| C | 5.618888 | 6.47801  | 5.881933 |
| H | 6.152854 | 7.43072  | 5.754891 |
| C | 6.295382 | 5.494477 | 4.904378 |
| O | 7.493214 | 5.524184 | 4.709855 |
| N | 5.452985 | 4.630995 | 4.261943 |
| H | 4.482262 | 4.610077 | 4.542123 |
| C | 5.878967 | 3.760707 | 3.185228 |
| H | 6.738855 | 3.154949 | 3.512433 |
| C | 4.737841 | 2.820785 | 2.752722 |
| H | 5.093837 | 2.192535 | 1.925913 |
| H | 3.89116  | 3.414849 | 2.376914 |
| C | 4.267082 | 1.910918 | 3.863649 |
| O | 4.946711 | 0.933018 | 4.233146 |
| N | 3.11815  | 2.254359 | 4.465508 |
| H | 2.378372 | 2.770476 | 3.941277 |
| H | 2.766486 | 1.607727 | 5.160993 |
| C | 6.388494 | 4.496986 | 1.92759  |
| O | 6.969044 | 3.822702 | 1.071858 |
| N | 6.148035 | 5.810865 | 1.804618 |
| H | 5.694624 | 6.319161 | 2.565078 |
| C | 6.740089 | 6.606839 | 0.734874 |
| H | 6.901424 | 5.946399 | -0.12706 |
| C | 5.882534 | 7.812257 | 0.327153 |
| H | 5.728536 | 8.454962 | 1.209069 |
| H | 6.473774 | 8.40014  | -0.39235 |
| C | 4.547598 | 7.443791 | -0.2729  |
| C | 4.343833 | 7.353158 | -1.65608 |
| H | 5.159159 | 7.607423 | -2.34    |
| C | 3.110322 | 6.959133 | -2.19009 |
| H | 2.966086 | 6.91077  | -3.27124 |
| C | 2.053517 | 6.638601 | -1.32995 |
| O | 0.849882 | 6.170627 | -1.75068 |
| H | 0.659123 | 6.165756 | -2.72426 |
| C | 2.227325 | 6.772533 | 0.05504  |
| H | 1.390191 | 6.588066 | 0.727303 |
| C | 3.458566 | 7.165469 | 0.566756 |
| H | 3.582376 | 7.291556 | 1.642004 |



|   |          |          |          |
|---|----------|----------|----------|
| C | -6.46705 | -5.81104 | -3.31166 |
| C | -6.17659 | -5.70314 | -1.82034 |
| C | -5.31899 | -5.27214 | -4.19189 |
| O | -6.64334 | -4.78961 | -1.13564 |
| C | -4.81765 | -3.93721 | -3.74778 |
| C | -3.53991 | -3.48902 | -3.49004 |
| N | -5.64058 | -2.87495 | -3.41986 |
| C | -4.87273 | -1.86506 | -2.97182 |
| N | -3.58913 | -2.19984 | -2.99411 |
| H | -6.67606 | -6.85569 | -3.58966 |
| H | -5.67119 | -5.23651 | -5.23719 |
| H | -4.4676  | -5.96925 | -4.17705 |
| H | -2.60159 | -4.01819 | -3.63499 |
| H | -5.29682 | -0.94074 | -2.5984  |
| H | -6.65521 | -2.84512 | -3.3091  |
| N | -5.36915 | -6.64987 | -1.30571 |
| H | -4.90692 | -7.34074 | -1.89661 |
| C | -4.9792  | -6.72211 | 0.081876 |
| H | -5.81293 | -7.03668 | 0.732168 |
| H | -4.66618 | -5.73646 | 0.461079 |
| C | -3.82844 | -7.73047 | 0.180429 |
| O | -3.34027 | -8.21344 | -0.83788 |
| N | -3.41914 | -8.03531 | 1.428695 |
| H | -3.94017 | -7.66711 | 2.234687 |
| C | -2.4313  | -9.07496 | 1.650739 |
| H | -2.45025 | -9.74864 | 0.7811   |
| C | -1.00534 | -8.55123 | 1.853644 |
| H | -0.7268  | -7.91612 | 0.996819 |
| H | -0.98533 | -7.90231 | 2.744732 |
| C | 0.005781 | -9.68864 | 2.012285 |
| H | 0.134083 | -10.2183 | 1.053689 |
| H | -0.38381 | -10.4449 | 2.719025 |
| C | 1.385397 | -9.2344  | 2.495769 |
| H | 2.097904 | -10.0737 | 2.480271 |
| H | 1.780774 | -8.46043 | 1.826295 |
| N | 1.330783 | -8.68569 | 3.851084 |
| H | 0.951748 | -9.2975  | 4.566063 |
| C | 1.476222 | -7.39269 | 4.184088 |
| N | 2.08481  | -6.51993 | 3.389726 |
| H | 2.70626  | -6.78182 | 2.634875 |
| H | 2.07581  | -5.53839 | 3.714721 |
| N | 1.00191  | -6.94906 | 5.358974 |
| H | 0.33021  | -7.49072 | 5.88569  |
| H | 1.146141 | -5.96188 | 5.59112  |
| C | 2.481877 | -4.50655 | -4.83638 |
| H | 2.068909 | -4.77794 | -5.82253 |
| H | 1.783837 | -4.84758 | -4.06008 |

|    |          |          |          |
|----|----------|----------|----------|
| N  | 2.713358 | -3.06891 | -4.74127 |
| H  | 3.627357 | -2.6827  | -5.007   |
| C  | 1.729292 | -2.15447 | -4.68254 |
| N  | 0.508665 | -2.48068 | -4.24388 |
| H  | 0.379439 | -3.25606 | -3.57687 |
| H  | -0.13352 | -1.69565 | -4.14702 |
| N  | 1.986168 | -0.90378 | -5.06989 |
| H  | 2.86007  | -0.67621 | -5.52274 |
| H  | 1.331505 | -0.13844 | -4.90648 |
| O  | -0.01468 | -4.34506 | -2.17701 |
| C  | -1.04108 | -4.15822 | -1.47581 |
| O  | -1.3892  | -3.01198 | -1.04594 |
| C  | -1.89175 | -5.34381 | -1.07774 |
| H  | -1.59968 | -6.25679 | -1.60776 |
| H  | -1.78836 | -5.51324 | 0.003755 |
| O  | 1.104562 | -0.22095 | -1.68038 |
| O  | 1.726637 | -2.67947 | -0.85478 |
| Fe | -2.38796 | -1.30766 | -1.40443 |
| C  | 4.279843 | -0.1651  | -1.5688  |
| N  | 3.92372  | -1.56343 | -1.96221 |
| H  | 3.017661 | -1.94484 | -1.54995 |
| H  | 3.92829  | -1.64926 | -2.99081 |
| H  | 4.641977 | -2.2023  | -1.59482 |
| C  | 4.48406  | -0.07196 | -0.04609 |
| O  | 3.992222 | -1.02422 | 0.638406 |
| O  | 5.04043  | 0.95248  | 0.351068 |
| C  | 3.250891 | 0.893585 | -1.97821 |
| C  | 1.925363 | 0.87311  | -1.22517 |
| C  | 1.128562 | 2.172972 | -1.32648 |
| C  | 1.428889 | 3.211544 | -0.24515 |
| N  | 0.234608 | 4.079148 | -0.03788 |
| H  | -0.62701 | 3.508341 | -0.09299 |
| H  | 0.231811 | 4.58089  | 0.896982 |
| H  | 0.199847 | 4.80496  | -0.78526 |
| H  | 4.035642 | -8.24248 | -0.1531  |
| H  | -8.21464 | -5.60443 | 4.903057 |
| H  | -9.93584 | -5.36556 | 0.602133 |
| H  | -8.85007 | 1.949489 | -3.11329 |
| H  | -4.70442 | 10.9757  | 0.757214 |
| H  | -3.54363 | -6.58976 | 5.967765 |
| H  | -2.73969 | -9.65862 | 2.533967 |
| H  | -7.3868  | -5.23589 | -3.4893  |
| H  | -2.95052 | -5.13059 | -1.27771 |
| H  | 1.914465 | 7.459435 | 3.355418 |
| H  | 7.734617 | 6.960872 | 1.060402 |
| H  | 5.79539  | 6.132635 | 6.910748 |
| H  | 1.698153 | -2.67189 | 6.688018 |

|   |          |          |          |
|---|----------|----------|----------|
| H | 6.077331 | -3.8925  | 4.374701 |
| H | 5.539105 | 5.069776 | -2.83565 |
| H | 9.5508   | 3.594744 | -2.26319 |
| H | 5.936747 | -4.01038 | -5.66536 |
| H | 1.223735 | -1.85333 | -0.97956 |
| H | 1.188675 | -3.35012 | -1.33436 |
| H | 1.646355 | 2.721114 | 0.709606 |
| H | 2.278304 | 3.865579 | -0.48887 |
| H | 0.080583 | 1.895638 | -1.19615 |
| H | 1.17971  | 2.611334 | -2.3319  |
| H | 0.651636 | -0.00845 | -2.54419 |
| H | 2.101086 | 0.652632 | -0.16289 |
| H | 3.055482 | 0.877725 | -3.06008 |
| H | 3.746063 | 1.847973 | -1.75808 |
| H | 5.230646 | 0.058374 | -2.07082 |
| H | 3.437131 | -5.02854 | -4.69205 |
| O | -0.97668 | -0.34188 | -0.02402 |
| H | -0.20136 | -0.29804 | -0.64106 |
| H | -0.94425 | 0.513167 | 0.462145 |
| O | -0.85088 | -1.14276 | 2.647429 |
| H | -0.13452 | -1.75318 | 2.881863 |
| H | -0.88516 | -1.1745  | 1.67066  |
| O | -2.02756 | 2.466821 | -0.88841 |
| H | -1.74    | 3.056824 | -1.65298 |
| H | -2.03446 | 1.583328 | -1.29201 |
| O | 2.395755 | -0.04768 | 2.551927 |
| H | 3.051993 | -0.3309  | 1.863533 |
| H | 1.671541 | 0.459838 | 2.129008 |
| O | 0.03557  | 1.335185 | 1.862314 |
| H | -0.37001 | 0.697051 | 2.485231 |
| H | 0.22989  | 2.17941  | 2.353607 |
| O | -8.44903 | 2.485194 | 0.12312  |
| H | -7.60998 | 2.50244  | -0.37475 |
| H | -8.66179 | 3.426215 | 0.301607 |

<sup>5</sup>TS1<sub>C,C5</sub>

|   |          |          |          |
|---|----------|----------|----------|
| C | -0.45633 | -6.39178 | -2.78063 |
| H | -0.28928 | -5.86793 | -1.82626 |
| C | -0.40166 | -5.43812 | -3.96934 |
| H | -0.55886 | -6.02149 | -4.88971 |
| H | -1.23552 | -4.72941 | -3.91086 |
| C | 0.8844   | -4.62855 | -4.0983  |
| H | 1.099344 | -4.08559 | -3.16323 |
| H | 1.758994 | -5.26769 | -4.28984 |
| C | 0.746433 | -3.57413 | -5.19157 |
| O | -0.31632 | -2.96152 | -5.34294 |
| N | 1.826871 | -3.3563  | -5.96035 |
| H | 2.77063  | -3.68282 | -5.71826 |
| H | 1.752872 | -2.63488 | -6.66966 |
| C | -1.76943 | -7.16809 | -2.7248  |
| O | -2.38178 | -7.4739  | -3.75394 |
| N | -2.18373 | -7.53397 | -1.49628 |
| H | -1.74818 | -7.14122 | -0.65515 |
| C | -3.31309 | -8.42561 | -1.27297 |
| H | -3.21789 | -8.79013 | -0.23904 |
| C | -4.69558 | -7.79426 | -1.47304 |
| H | -4.83062 | -7.58501 | -2.54652 |
| H | -5.44939 | -8.55693 | -1.2108  |
| C | -4.92307 | -6.52692 | -0.65211 |
| H | -4.20115 | -5.7491  | -0.94798 |
| H | -4.7303  | -6.71851 | 0.416581 |
| C | -6.33518 | -5.96663 | -0.81923 |
| H | -6.57457 | -5.85944 | -1.8953  |
| H | -7.07041 | -6.67727 | -0.39832 |
| N | -6.43683 | -4.67959 | -0.15115 |
| H | -5.54834 | -4.1867  | 0.045298 |
| C | -7.51544 | -3.90303 | -0.12582 |
| N | -8.70301 | -4.33286 | -0.64154 |
| H | -8.86111 | -5.3312  | -0.7083  |
| H | -9.50751 | -3.74827 | -0.40956 |
| N | -7.42933 | -2.6722  | 0.365594 |
| H | -6.57574 | -2.45925 | 0.912242 |
| H | -8.2738  | -2.09539 | 0.404289 |
| C | -7.27164 | -3.04958 | -4.52363 |
| H | -7.61346 | -4.09556 | -4.48953 |
| C | -5.97528 | -2.89831 | -3.69779 |
| H | -5.71085 | -1.83428 | -3.64226 |
| H | -6.1162  | -3.23736 | -2.66135 |
| C | -4.86352 | -3.66867 | -4.32897 |
| N | -4.22779 | -3.22814 | -5.47684 |
| C | -3.4058  | -4.20567 | -5.84108 |

|   |          |          |          |
|---|----------|----------|----------|
| H | -2.71744 | -4.18185 | -6.68379 |
| N | -3.49075 | -5.25386 | -4.98814 |
| H | -2.94083 | -6.12189 | -4.94789 |
| C | -4.40284 | -4.92739 | -4.01487 |
| H | -4.63145 | -5.60085 | -3.19974 |
| C | -8.35645 | -2.09951 | -4.06982 |
| O | -8.33545 | -0.90078 | -4.35533 |
| N | -9.33489 | -2.64461 | -3.30277 |
| H | -9.19862 | -3.58384 | -2.94258 |
| C | -10.3941 | -1.83994 | -2.6994  |
| H | -10.6634 | -1.07488 | -3.44228 |
| C | -11.6127 | -2.68809 | -2.37351 |
| H | -12.4043 | -2.06878 | -1.92947 |
| H | -11.374  | -3.4802  | -1.64836 |
| H | -12.0025 | -3.15605 | -3.28869 |
| C | -9.80857 | -1.12969 | -1.46179 |
| O | -9.89196 | -1.62863 | -0.3319  |
| N | -9.16043 | 0.005538 | -1.76005 |
| H | -9.06005 | 0.192094 | -2.75911 |
| C | -8.39703 | 0.856093 | -0.85944 |
| H | -8.23286 | 0.335485 | 0.094524 |
| C | -7.0578  | 1.258284 | -1.5022  |
| H | -7.27617 | 1.494045 | -2.56129 |
| C | -6.48322 | 2.519739 | -0.85523 |
| H | -7.17622 | 3.373649 | -0.9436  |
| H | -6.27607 | 2.324192 | 0.20786  |
| H | -5.53315 | 2.79254  | -1.33529 |
| C | -6.0529  | 0.103387 | -1.46366 |
| H | -6.50205 | -0.83153 | -1.82146 |
| H | -5.70311 | -0.06159 | -0.43479 |
| H | -5.17946 | 0.321442 | -2.09778 |
| C | -2.62146 | 1.390972 | 5.894772 |
| H | -1.73843 | 2.048913 | 5.914706 |
| C | -2.15227 | -0.06508 | 5.924    |
| H | -1.40608 | -0.19818 | 5.120527 |
| C | -1.48043 | -0.4037  | 7.250288 |
| H | -1.16766 | -1.46015 | 7.270791 |
| H | -2.18317 | -0.25487 | 8.084341 |
| H | -0.59129 | 0.224704 | 7.41306  |
| O | -3.27308 | -0.89786 | 5.677321 |
| H | -2.94553 | -1.77728 | 5.363219 |
| C | -3.45469 | 1.71257  | 4.682036 |
| O | -4.51202 | 2.365873 | 4.784876 |
| N | -3.05433 | 1.243974 | 3.489133 |
| H | -2.2159  | 0.665372 | 3.377586 |
| C | -3.94416 | 1.246612 | 2.351843 |
| H | -4.23329 | 2.264208 | 2.056923 |

|   |          |          |          |
|---|----------|----------|----------|
| H | -3.41557 | 0.790218 | 1.504295 |
| C | -5.21948 | 0.415687 | 2.564098 |
| O | -6.20876 | 0.619539 | 1.853497 |
| N | -5.13474 | -0.51716 | 3.521622 |
| H | -4.30508 | -0.56639 | 4.124231 |
| C | -6.13906 | -1.52689 | 3.778172 |
| H | -7.04426 | -1.26139 | 3.214198 |
| C | -5.61242 | -2.8962  | 3.346819 |
| H | -4.73245 | -3.17656 | 3.94821  |
| H | -6.39293 | -3.65718 | 3.512684 |
| O | -5.28897 | -2.91267 | 1.973602 |
| H | -4.46714 | -2.41356 | 1.746985 |
| C | -1.58187 | 8.204385 | 4.728734 |
| H | -0.82166 | 7.862899 | 5.446904 |
| C | -2.4722  | 7.039956 | 4.296413 |
| H | -3.35315 | 7.432452 | 3.762641 |
| H | -2.8574  | 6.561576 | 5.21405  |
| C | -1.80212 | 5.966355 | 3.419229 |
| H | -1.7152  | 6.382335 | 2.399812 |
| C | -0.38923 | 5.592568 | 3.880123 |
| H | 0.308929 | 6.436613 | 3.786273 |
| H | 0.000958 | 4.775232 | 3.258104 |
| H | -0.39062 | 5.240992 | 4.926168 |
| C | -2.70835 | 4.736885 | 3.366704 |
| H | -2.28118 | 3.939958 | 2.746172 |
| H | -3.70498 | 4.982177 | 2.969833 |
| H | -2.85094 | 4.325564 | 4.376612 |
| C | -0.91782 | 8.93416  | 3.578662 |
| O | -1.50963 | 9.227288 | 2.538411 |
| N | 0.368183 | 9.299348 | 3.787619 |
| H | 0.841702 | 8.969692 | 4.61863  |
| C | 1.107612 | 10.06369 | 2.822991 |
| H | 0.510143 | 10.93291 | 2.504696 |
| C | 1.503581 | 9.271823 | 1.569213 |
| O | 1.376765 | 8.054413 | 1.481364 |
| N | 1.99252  | 10.05767 | 0.589236 |
| H | 2.164019 | 11.03413 | 0.795546 |
| C | 2.511074 | 9.513594 | -0.64544 |
| H | 1.710881 | 9.02159  | -1.20984 |
| C | 3.654703 | 8.528226 | -0.39129 |
| O | 4.497802 | 8.723931 | 0.468047 |
| N | 3.649124 | 7.457293 | -1.22248 |
| C | 4.688962 | 6.461573 | -1.13933 |
| C | 4.750537 | 5.711471 | -2.46592 |
| C | 4.495525 | 5.491019 | 0.066591 |
| O | 3.770325 | 5.614637 | -3.21015 |
| C | 3.184847 | 4.780954 | 0.070365 |

|   |          |          |          |
|---|----------|----------|----------|
| C | 2.837133 | 3.476823 | -0.21944 |
| N | 1.988538 | 5.418861 | 0.359431 |
| C | 0.988911 | 4.529172 | 0.230752 |
| N | 1.462909 | 3.33344  | -0.11445 |
| H | 2.822783 | 7.248123 | -1.78597 |
| H | 5.645248 | 6.976968 | -0.96571 |
| H | 5.321343 | 4.766944 | 0.084034 |
| H | 4.592451 | 6.114577 | 0.968405 |
| H | 3.490496 | 2.653896 | -0.49946 |
| H | -0.06013 | 4.764238 | 0.375838 |
| H | 1.857868 | 6.408854 | 0.609481 |
| N | 5.941831 | 5.14645  | -2.74915 |
| H | 6.64562  | 5.04394  | -2.00324 |
| C | 6.038542 | 4.203789 | -3.8385  |
| H | 5.537424 | 4.608146 | -4.72801 |
| C | 5.429275 | 2.866868 | -3.42541 |
| O | 5.631859 | 2.396059 | -2.29864 |
| N | 4.645921 | 2.236453 | -4.31354 |
| C | 3.994823 | 0.991032 | -3.936   |
| C | 5.03729  | -0.13745 | -3.86019 |
| C | 2.87164  | 0.63862  | -4.90925 |
| O | 5.7495   | -0.39945 | -4.81644 |
| C | 1.8707   | -0.36951 | -4.32492 |
| C | 0.983859 | 0.234237 | -3.25348 |
| O | -0.26542 | 0.187531 | -3.39591 |
| O | 1.531579 | 0.789035 | -2.2503  |
| H | 4.572672 | 2.580939 | -5.26388 |
| H | 3.572388 | 1.153799 | -2.94102 |
| H | 2.336207 | 1.561348 | -5.19095 |
| H | 3.316735 | 0.221431 | -5.82673 |
| H | 2.407032 | -1.22861 | -3.88879 |
| H | 1.224289 | -0.7676  | -5.11472 |
| N | 5.06922  | -0.77022 | -2.66422 |
| H | 4.517344 | -0.40562 | -1.87601 |
| C | 6.008013 | -1.8212  | -2.33558 |
| H | 5.680348 | -2.23088 | -1.36797 |
| C | 6.048404 | -2.96665 | -3.37358 |
| H | 6.706557 | -2.7186  | -4.21216 |
| H | 6.453268 | -3.86638 | -2.8836  |
| C | 4.703863 | -3.3155  | -3.98647 |
| O | 3.626329 | -3.32576 | -3.1945  |
| O | 4.575152 | -3.58411 | -5.16178 |
| C | 7.432074 | -1.29245 | -2.09245 |
| O | 8.355582 | -2.0674  | -1.84294 |
| N | 7.594197 | 0.044395 | -2.16715 |
| H | 6.780944 | 0.651286 | -2.24419 |
| C | 8.915358 | 0.656997 | -2.21151 |

|   |          |          |          |
|---|----------|----------|----------|
| H | 9.593169 | -0.12127 | -2.59552 |
| C | 8.935463 | 1.861417 | -3.14008 |
| H | 9.965579 | 2.217386 | -3.27736 |
| H | 8.358202 | 2.689909 | -2.71302 |
| H | 8.518641 | 1.580805 | -4.11861 |
| C | 9.408055 | 1.0046   | -0.79096 |
| O | 9.586419 | 2.161047 | -0.4127  |
| N | 9.636911 | -0.0869  | -0.03341 |
| H | 9.308023 | -0.97582 | -0.4179  |
| C | 10.15378 | -0.0439  | 1.329316 |
| H | 11.12094 | 0.490877 | 1.301048 |
| C | 9.260947 | 0.722927 | 2.323446 |
| H | 9.353022 | 1.789723 | 2.085609 |
| H | 9.70001  | 0.553766 | 3.317071 |
| C | 7.798232 | 0.342482 | 2.342656 |
| C | 6.835547 | 1.221136 | 1.819114 |
| H | 7.15839  | 2.149756 | 1.341638 |
| C | 5.470764 | 0.942257 | 1.944891 |
| H | 4.731945 | 1.666303 | 1.591368 |
| C | 5.05272  | -0.23758 | 2.567087 |
| H | 3.990874 | -0.42577 | 2.719354 |
| C | 6.000784 | -1.14981 | 3.040487 |
| H | 5.674876 | -2.08056 | 3.510618 |
| C | 7.361713 | -0.8538  | 2.938721 |
| H | 8.102144 | -1.5373  | 3.35361  |
| C | 10.46017 | -1.47504 | 1.820862 |
| O | 10.3605  | -1.76951 | 3.001299 |
| N | 10.8491  | -2.35741 | 0.863405 |
| H | 10.92827 | -2.03619 | -0.09364 |
| C | 10.88414 | -3.79551 | 1.089396 |
| H | 10.96561 | -3.946   | 2.173606 |
| C | 9.644706 | -4.48925 | 0.510403 |
| H | 9.61664  | -4.29618 | -0.57616 |
| H | 9.766805 | -5.58059 | 0.632821 |
| C | 8.303597 | -4.05162 | 1.121275 |
| H | 8.255571 | -2.94963 | 1.074305 |
| C | 7.137302 | -4.57156 | 0.278782 |
| H | 7.24647  | -4.25102 | -0.76831 |
| H | 7.083881 | -5.67392 | 0.300404 |
| H | 6.184816 | -4.18001 | 0.662082 |
| C | 8.15507  | -4.46629 | 2.588508 |
| H | 8.915858 | -3.98841 | 3.222865 |
| H | 7.164375 | -4.18676 | 2.980343 |
| H | 8.25491  | -5.56064 | 2.694777 |
| C | 3.402568 | -5.82417 | 5.95251  |
| H | 3.638204 | -5.99764 | 7.014647 |
| C | 3.07401  | -4.33243 | 5.728386 |



|   |          |          |          |
|---|----------|----------|----------|
| H | 2.058063 | -4.09253 | 6.077455 |
| H | 3.778174 | -3.73461 | 6.327525 |
| C | 3.278058 | -3.89601 | 4.269649 |
| O | 4.394165 | -4.05725 | 3.768976 |
| O | 2.269095 | -3.37706 | 3.662835 |
| C | 2.260771 | -6.73584 | 5.545103 |
| O | 2.192006 | -7.29679 | 4.451488 |
| N | 1.249367 | -6.84371 | 6.455926 |
| H | 1.382426 | -6.42426 | 7.368315 |
| C | 0.122937 | -7.73998 | 6.270366 |
| H | 0.464564 | -8.76528 | 6.056866 |
| C | -0.82951 | -7.38493 | 5.124054 |
| O | -1.66791 | -8.1769  | 4.739327 |
| N | -0.63213 | -6.16802 | 4.546525 |
| H | 0.069058 | -5.54812 | 4.933777 |
| C | -1.30658 | -5.78915 | 3.327624 |
| H | -2.39473 | -5.90325 | 3.448026 |
| C | -0.96248 | -4.33822 | 2.976518 |
| H | -1.56222 | -4.04743 | 2.104708 |
| H | 0.103908 | -4.29192 | 2.725355 |
| C | -1.25834 | -3.36913 | 4.106918 |
| O | -2.42385 | -3.0697  | 4.398122 |
| N | -0.17674 | -2.91319 | 4.754755 |
| H | 0.790514 | -3.04806 | 4.377852 |
| H | -0.30275 | -2.19094 | 5.455058 |
| C | -0.93456 | -6.66858 | 2.116567 |
| O | -1.61191 | -6.57775 | 1.089953 |
| N | 0.150524 | -7.45276 | 2.243604 |
| H | 0.673746 | -7.43977 | 3.122302 |
| C | 0.512166 | -8.46675 | 1.271993 |
| H | 0.046269 | -8.20363 | 0.312619 |
| C | 2.038746 | -8.60299 | 1.117026 |
| H | 2.476608 | -8.88202 | 2.08715  |
| H | 2.231015 | -9.42629 | 0.410837 |
| C | 2.656647 | -7.33118 | 0.622431 |
| C | 2.609856 | -6.99854 | -0.76102 |
| H | 2.208278 | -7.73026 | -1.46648 |
| C | 3.046366 | -5.77885 | -1.21585 |
| H | 2.998381 | -5.51006 | -2.27052 |
| C | 3.549549 | -4.79461 | -0.27655 |
| O | 3.848196 | -3.61318 | -0.63917 |
| H | 3.811796 | -3.29762 | -2.2101  |
| C | 3.666084 | -5.17696 | 1.110587 |
| H | 4.099699 | -4.48311 | 1.83765  |
| C | 3.216278 | -6.40488 | 1.535114 |
| H | 3.267565 | -6.66599 | 2.593886 |
| C | -0.19235 | 7.576547 | -4.04867 |

|   |          |          |          |
|---|----------|----------|----------|
| C | -0.22261 | 7.543594 | -2.5288  |
| C | -0.73976 | 6.262543 | -4.64853 |
| O | 0.778123 | 7.251215 | -1.87057 |
| C | -0.18895 | 5.052974 | -3.97071 |
| C | -0.81994 | 4.053818 | -3.26278 |
| N | 1.162152 | 4.775322 | -3.86223 |
| C | 1.309068 | 3.661282 | -3.1215  |
| N | 0.126807 | 3.193643 | -2.73876 |
| H | -0.76737 | 8.430001 | -4.4398  |
| H | -0.52362 | 6.246037 | -5.73    |
| H | -1.83513 | 6.228078 | -4.54966 |
| H | -1.88356 | 3.905907 | -3.09859 |
| H | 2.277837 | 3.258575 | -2.84852 |
| H | 1.964399 | 5.373365 | -4.06834 |
| N | -1.40798 | 7.815336 | -1.95351 |
| H | -2.25597 | 7.886731 | -2.51279 |
| C | -1.6361  | 7.763615 | -0.52746 |
| H | -1.16213 | 8.602783 | 0.005143 |
| H | -1.19827 | 6.846788 | -0.09681 |
| C | -3.14844 | 7.758806 | -0.30638 |
| O | -3.90743 | 7.423419 | -1.21524 |
| N | -3.57131 | 8.130953 | 0.916702 |
| H | -2.89304 | 8.517765 | 1.5858   |
| C | -4.99492 | 8.234461 | 1.187294 |
| H | -5.4868  | 8.671376 | 0.303292 |
| C | -5.65877 | 6.891343 | 1.508678 |
| H | -5.37409 | 6.164708 | 0.732405 |
| H | -5.25814 | 6.511531 | 2.463494 |
| C | -7.18254 | 6.997475 | 1.57067  |
| H | -7.58018 | 7.246551 | 0.572706 |
| H | -7.48327 | 7.833152 | 2.229873 |
| C | -7.87323 | 5.719683 | 2.05332  |
| H | -8.96618 | 5.80812  | 1.958201 |
| H | -7.56606 | 4.865649 | 1.434099 |
| N | -7.55035 | 5.42264  | 3.45002  |
| H | -7.80759 | 6.135933 | 4.124025 |
| C | -6.68188 | 4.488699 | 3.874423 |
| N | -6.35386 | 3.438023 | 3.128275 |
| H | -6.93353 | 3.089229 | 2.37466  |
| H | -5.65646 | 2.802059 | 3.552863 |
| N | -6.11627 | 4.600778 | 5.084105 |
| H | -6.14974 | 5.470911 | 5.597361 |
| H | -5.48624 | 3.849662 | 5.389102 |
| C | -5.48232 | 0.576878 | -5.22659 |
| H | -6.41627 | 0.00377  | -5.29422 |
| H | -5.43987 | 1.309778 | -6.04963 |
| N | -4.35438 | -0.3362  | -5.26042 |

|    |          |          |          |
|----|----------|----------|----------|
| H  | -4.46834 | -1.31325 | -5.58857 |
| C  | -3.10532 | -0.00737 | -4.92664 |
| N  | -2.82123 | 1.188039 | -4.36578 |
| H  | -3.53668 | 1.716955 | -3.88177 |
| H  | -1.86662 | 1.334213 | -4.04389 |
| N  | -2.10665 | -0.85345 | -5.16373 |
| H  | -2.27198 | -1.77441 | -5.55335 |
| H  | -1.20066 | -0.68278 | -4.7205  |
| O  | -3.06144 | 2.317346 | -1.53752 |
| C  | -2.57811 | 3.026045 | -0.63391 |
| O  | -1.44068 | 2.803353 | -0.07472 |
| C  | -3.33001 | 4.252301 | -0.15834 |
| H  | -4.31305 | 3.954331 | 0.232189 |
| H  | -2.78157 | 4.790758 | 0.621257 |
| O  | -0.06383 | 0.307348 | 0.02602  |
| O  | -1.27812 | -0.59824 | 2.273671 |
| Fe | 0.156223 | 1.881525 | -1.02906 |
| C  | -2.6914  | -1.70268 | -1.66945 |
| N  | -2.19583 | -0.3234  | -1.48377 |
| H  | -1.60312 | -0.20315 | -0.6301  |
| H  | -1.5365  | -0.07202 | -2.25142 |
| H  | -2.90327 | 0.430766 | -1.44714 |
| C  | -3.4892  | -2.20136 | -0.44933 |
| O  | -3.28986 | -1.62276 | 0.664132 |
| O  | -4.22266 | -3.17429 | -0.67845 |
| C  | -1.53774 | -2.66918 | -1.97484 |
| C  | -0.61895 | -3.01696 | -0.79672 |
| C  | 0.567402 | -2.12557 | -0.42921 |
| C  | 1.109552 | -2.61503 | 0.898924 |
| N  | 2.420911 | -2.11164 | 1.347518 |
| H  | 2.409515 | -1.0805  | 1.460356 |
| H  | 2.579383 | -2.57864 | 2.307514 |
| H  | 3.172633 | -2.35719 | 0.682306 |
| H  | -8.98865 | 1.762506 | -0.63831 |
| H  | 2.026122 | 10.44185 | 3.297061 |
| H  | 2.908025 | 10.34337 | -1.24792 |
| H  | 7.09946  | 4.038529 | -4.07634 |
| H  | 11.7963  | -4.20746 | 0.629241 |
| H  | -2.19268 | 8.955233 | 5.259613 |
| H  | -5.12879 | 8.9372   | 2.024292 |
| H  | 0.858093 | 7.721547 | -4.338   |
| H  | -3.51366 | 4.931039 | -1.00469 |
| H  | 4.290348 | -6.08411 | 5.360945 |
| H  | 0.098456 | -9.44347 | 1.578792 |
| H  | -0.45971 | -7.77821 | 7.201516 |
| H  | -3.25072 | 1.605627 | 6.769865 |
| H  | -6.38554 | -1.53719 | 4.852863 |

|   |          |          |          |
|---|----------|----------|----------|
| H | 0.348305 | -7.14431 | -2.8591  |
| H | -3.21862 | -9.29008 | -1.94803 |
| H | -7.05236 | -2.81191 | -5.57487 |
| H | -0.84835 | -0.13331 | 1.509483 |
| H | -1.98438 | -1.1239  | 1.836699 |
| H | 0.388953 | -2.35973 | 1.685779 |
| H | 1.186769 | -3.71378 | 0.880429 |
| H | 0.265254 | -0.93399 | -0.28079 |
| H | 1.333523 | -2.07899 | -1.21969 |
| H | -1.23736 | -3.17242 | 0.100799 |
| H | -0.18587 | -4.01083 | -1.00621 |
| H | -0.9679  | -2.31333 | -2.84555 |
| H | -2.03431 | -3.59427 | -2.29556 |
| H | -3.36938 | -1.69806 | -2.53335 |
| H | -5.52839 | 1.124588 | -4.27161 |
| O | 1.999451 | 0.69138  | 1.725995 |
| H | 1.216941 | 0.556599 | 1.133225 |
| H | 1.687516 | 0.414015 | 2.630224 |
| O | -0.16616 | 2.521018 | 2.366677 |
| H | -0.75434 | 2.679631 | 1.600264 |
| H | 0.697066 | 2.289348 | 1.980119 |
| O | 3.416048 | -0.10716 | -0.56271 |
| H | 2.661136 | 0.212479 | -1.09958 |
| H | 3.364684 | 0.376488 | 0.279344 |
| O | 0.908023 | -0.20753 | 3.993721 |
| H | 0.082428 | -0.47282 | 3.540992 |
| H | 0.684392 | 0.618227 | 4.48087  |
| O | 0.215645 | 2.277092 | 4.968848 |
| H | -0.03596 | 2.502163 | 4.03843  |
| H | 0.985426 | 2.829296 | 5.162083 |
| O | 7.397577 | 3.908934 | -0.71639 |
| H | 6.828717 | 3.200648 | -1.07411 |
| H | 8.262919 | 3.474594 | -0.55842 |

<sup>5</sup>IM1<sub>C,C5</sub>

|   |          |          |          |
|---|----------|----------|----------|
| C | 6.529424 | 1.788793 | -2.80434 |
| H | 6.063876 | 1.85112  | -1.8071  |
| C | 5.514245 | 1.395938 | -3.87376 |
| H | 6.015638 | 1.392886 | -4.85364 |
| H | 5.196277 | 0.36161  | -3.70289 |
| C | 4.272262 | 2.27659  | -3.94062 |
| H | 3.857156 | 2.460148 | -2.93404 |
| H | 4.501829 | 3.274803 | -4.3409  |
| C | 3.147672 | 1.652047 | -4.76452 |
| O | 3.114995 | 0.426987 | -4.99147 |
| N | 2.209689 | 2.499827 | -5.18661 |
| H | 2.134855 | 3.467167 | -4.80097 |
| H | 1.404005 | 2.107979 | -5.66103 |
| C | 7.71561  | 0.832447 | -2.76147 |
| O | 8.109513 | 0.234893 | -3.77768 |
| N | 8.328521 | 0.702307 | -1.57784 |
| H | 7.914314 | 1.071843 | -0.7135  |
| C | 9.511446 | -0.11904 | -1.37541 |
| H | 9.952394 | 0.212123 | -0.42438 |
| C | 9.227303 | -1.62534 | -1.31842 |
| H | 9.011526 | -1.98203 | -2.34023 |
| H | 10.15573 | -2.13211 | -1.00134 |
| C | 8.069575 | -1.99466 | -0.3915  |
| H | 7.132912 | -1.55593 | -0.76375 |
| H | 8.206748 | -1.54874 | 0.6065   |
| C | 7.894286 | -3.509   | -0.28034 |
| H | 7.967629 | -3.95813 | -1.28442 |
| H | 8.705977 | -3.94968 | 0.326703 |
| N | 6.590275 | -3.8604  | 0.271517 |
| H | 6.228278 | -3.32977 | 1.085652 |
| C | 5.814699 | -4.83881 | -0.18075 |
| N | 6.298039 | -5.80163 | -0.99719 |
| H | 7.289971 | -5.99917 | -0.96446 |
| H | 5.651703 | -6.57326 | -1.21828 |
| N | 4.503519 | -4.84499 | 0.10332  |
| H | 4.108665 | -4.08042 | 0.66523  |
| H | 3.980272 | -5.71984 | 0.065916 |
| C | 4.888397 | -5.85465 | -4.88476 |
| H | 5.970085 | -6.04137 | -4.96319 |
| C | 4.619931 | -4.65557 | -3.95074 |
| H | 3.527081 | -4.5675  | -3.84907 |
| H | 5.024579 | -4.89134 | -2.956   |
| C | 5.197155 | -3.36736 | -4.4347  |
| N | 4.610011 | -2.63954 | -5.45237 |
| C | 5.388374 | -1.58492 | -5.65296 |

|   |          |          |          |
|---|----------|----------|----------|
| H | 5.182518 | -0.77336 | -6.34606 |
| N | 6.455813 | -1.60306 | -4.82591 |
| H | 7.146656 | -0.83995 | -4.65452 |
| C | 6.349544 | -2.72159 | -4.03361 |
| H | 7.08437  | -2.95492 | -3.26947 |
| C | 4.134555 | -7.04512 | -4.33622 |
| O | 2.907099 | -7.07199 | -4.2983  |
| N | 4.877403 | -8.03868 | -3.78005 |
| H | 5.887747 | -7.97433 | -3.78875 |
| C | 4.241987 | -9.05984 | -2.97129 |
| H | 3.47412  | -9.56098 | -3.58243 |
| C | 5.270473 | -10.0792 | -2.48482 |
| H | 4.781019 | -10.8648 | -1.89228 |
| H | 6.024777 | -9.594   | -1.84575 |
| H | 5.775673 | -10.5557 | -3.33806 |
| C | 3.552277 | -8.38642 | -1.76994 |
| O | 4.136488 | -7.50891 | -1.12611 |
| N | 2.336581 | -8.85219 | -1.45554 |
| H | 1.89896  | -9.48171 | -2.1197  |
| C | 1.506165 | -8.31719 | -0.38667 |
| H | 2.153608 | -7.75632 | 0.30041  |
| C | 0.382946 | -7.40171 | -0.90235 |
| H | -0.20885 | -7.97779 | -1.6397  |
| C | -0.53355 | -7.03084 | 0.268062 |
| H | -1.01232 | -7.93073 | 0.694816 |
| H | 0.069066 | -6.53183 | 1.042029 |
| H | -1.33076 | -6.34545 | -0.05282 |
| C | 0.934358 | -6.15312 | -1.59721 |
| H | 1.615701 | -6.42421 | -2.41656 |
| H | 1.467236 | -5.5257  | -0.8667  |
| H | 0.110891 | -5.56241 | -2.02227 |
| C | 0.443962 | -2.37223 | 5.75425  |
| H | -0.41887 | -1.68611 | 5.745946 |
| C | 1.733423 | -1.54333 | 5.742119 |
| H | 1.633875 | -0.77556 | 4.956295 |
| C | 1.940448 | -0.87151 | 7.098289 |
| H | 2.873815 | -0.28671 | 7.118347 |
| H | 2.023911 | -1.6331  | 7.888611 |
| H | 1.106157 | -0.19567 | 7.344354 |
| O | 2.83141  | -2.38891 | 5.421471 |
| H | 3.585988 | -1.83104 | 5.113558 |
| C | 0.277609 | -3.33241 | 4.601348 |
| O | -0.27241 | -4.44169 | 4.785886 |
| N | 0.729076 | -2.96331 | 3.400788 |
| H | 1.224409 | -2.05556 | 3.273102 |
| C | 0.895331 | -3.90423 | 2.317929 |
| H | 0.009915 | -4.54075 | 2.200523 |

|   |          |          |          |
|---|----------|----------|----------|
| H | 1.010526 | -3.35846 | 1.37206  |
| C | 2.128162 | -4.80396 | 2.442926 |
| O | 2.260232 | -5.75021 | 1.658036 |
| N | 3.017919 | -4.46382 | 3.3872   |
| H | 2.820668 | -3.66913 | 4.006556 |
| C | 4.308501 | -5.10335 | 3.555933 |
| H | 4.506234 | -5.70471 | 2.658668 |
| C | 5.423462 | -4.08086 | 3.79256  |
| H | 5.244905 | -3.55656 | 4.745969 |
| H | 6.37333  | -4.63546 | 3.906551 |
| O | 5.529314 | -3.14451 | 2.742021 |
| H | 5.336671 | -2.24574 | 3.085997 |
| C | -5.38808 | -3.83395 | 5.22542  |
| H | -5.34439 | -2.85563 | 5.726928 |
| C | -4.16657 | -4.0465  | 4.327819 |
| H | -4.16604 | -5.08905 | 3.974346 |
| H | -3.25649 | -3.93086 | 4.940085 |
| C | -4.0672  | -3.11251 | 3.110285 |
| H | -4.90071 | -3.3664  | 2.430397 |
| C | -4.21948 | -1.63829 | 3.503733 |
| H | -5.25126 | -1.40643 | 3.805755 |
| H | -3.98075 | -0.97714 | 2.658468 |
| H | -3.53717 | -1.37618 | 4.32714  |
| C | -2.75207 | -3.37376 | 2.373142 |
| H | -2.66696 | -2.78232 | 1.452034 |
| H | -2.65941 | -4.43659 | 2.095061 |
| H | -1.8966  | -3.12499 | 3.015053 |
| C | -6.69919 | -3.99226 | 4.477683 |
| O | -6.89592 | -4.91446 | 3.687705 |
| N | -7.6628  | -3.08237 | 4.765645 |
| H | -7.41943 | -2.27974 | 5.333102 |
| C | -8.92081 | -3.07467 | 4.070647 |
| H | -9.21622 | -4.11706 | 3.875175 |
| C | -8.83928 | -2.35602 | 2.718326 |
| O | -7.75376 | -2.09806 | 2.199716 |
| N | -10.0206 | -2.0985  | 2.129582 |
| H | -10.8678 | -2.18266 | 2.678749 |
| C | -10.0837 | -1.41106 | 0.85487  |
| H | -9.53076 | -1.9762  | 0.093555 |
| C | -9.52483 | 0.014297 | 0.966403 |
| O | -9.68642 | 0.686008 | 1.972181 |
| N | -8.85863 | 0.439857 | -0.13425 |
| C | -8.26466 | 1.757396 | -0.18304 |
| C | -7.89938 | 2.063674 | -1.63441 |
| C | -7.02145 | 1.882395 | 0.754634 |
| O | -7.72097 | 1.15366  | -2.45003 |
| C | -5.94338 | 0.887085 | 0.481636 |

|   |          |          |          |
|---|----------|----------|----------|
| C | -4.66112 | 1.032832 | -0.00271 |
| N | -6.10904 | -0.47795 | 0.670086 |
| C | -4.98811 | -1.10646 | 0.299214 |
| N | -4.07803 | -0.22021 | -0.10863 |
| H | -8.60051 | -0.21865 | -0.87243 |
| H | -8.99688 | 2.495465 | 0.179049 |
| H | -6.61637 | 2.900786 | 0.686835 |
| H | -7.40812 | 1.752521 | 1.776693 |
| H | -4.14234 | 1.944266 | -0.28051 |
| H | -4.84639 | -2.18132 | 0.308984 |
| H | -6.92058 | -0.97212 | 1.071433 |
| N | -7.74317 | 3.363405 | -1.94571 |
| H | -7.71356 | 4.072002 | -1.19589 |
| C | -7.04926 | 3.720413 | -3.16346 |
| H | -7.41494 | 3.109781 | -3.99945 |
| C | -5.54239 | 3.538632 | -2.95944 |
| O | -5.03459 | 3.77645  | -1.85774 |
| N | -4.80476 | 3.085466 | -3.99227 |
| C | -3.36881 | 2.885594 | -3.80126 |
| C | -2.65281 | 4.247558 | -3.81826 |
| C | -2.75855 | 1.921508 | -4.81703 |
| O | -2.53637 | 4.888726 | -4.85116 |
| C | -1.37932 | 1.379078 | -4.37033 |
| C | -1.47066 | 0.48875  | -3.15956 |
| O | -1.05148 | -0.7018  | -3.13346 |
| O | -2.06317 | 0.929759 | -2.11099 |
| H | -5.21119 | 3.016036 | -4.91913 |
| H | -3.26796 | 2.452558 | -2.80468 |
| H | -3.44868 | 1.079658 | -4.98599 |
| H | -2.62992 | 2.452208 | -5.77349 |
| H | -0.71077 | 2.219027 | -4.10662 |
| H | -0.9196  | 0.805838 | -5.18714 |
| N | -2.24329 | 4.631764 | -2.59217 |
| H | -2.31497 | 3.966078 | -1.82946 |
| C | -1.41725 | 5.784314 | -2.29184 |
| H | -1.01702 | 5.593658 | -1.28317 |
| C | -0.23588 | 5.967246 | -3.24986 |
| H | -0.59713 | 6.205701 | -4.26053 |
| H | 0.373637 | 6.819269 | -2.9209  |
| C | 0.673612 | 4.740532 | -3.38048 |
| O | 1.788313 | 4.930326 | -3.95527 |
| O | 0.296954 | 3.619569 | -2.9465  |
| C | -2.28073 | 7.041848 | -2.12033 |
| O | -1.79234 | 8.155433 | -1.93397 |
| N | -3.6139  | 6.810124 | -2.12018 |
| H | -3.92057 | 5.842372 | -2.14908 |
| C | -4.61267 | 7.860058 | -2.01252 |



|   |          |          |          |
|---|----------|----------|----------|
| H | -4.17003 | 8.75777  | -2.47166 |
| C | -5.88623 | 7.466852 | -2.7451  |
| H | -6.61545 | 8.287678 | -2.71851 |
| H | -6.35514 | 6.600581 | -2.25852 |
| H | -5.65527 | 7.225373 | -3.79308 |
| C | -4.87895 | 8.197318 | -0.52799 |
| O | -5.94575 | 7.937246 | 0.028163 |
| N | -3.8317  | 8.800673 | 0.067683 |
| H | -2.95114 | 8.76741  | -0.45353 |
| C | -3.81907 | 9.278406 | 1.445089 |
| H | -4.64998 | 9.998287 | 1.556216 |
| C | -4.04139 | 8.176692 | 2.503057 |
| H | -5.08758 | 7.85496  | 2.42426  |
| H | -3.89837 | 8.659447 | 3.479102 |
| C | -3.13001 | 6.980226 | 2.373706 |
| C | -3.57722 | 5.814645 | 1.729628 |
| H | -4.59362 | 5.781836 | 1.330944 |
| C | -2.75506 | 4.689768 | 1.632039 |
| H | -3.11957 | 3.776561 | 1.160914 |
| C | -1.4634  | 4.721197 | 2.166628 |
| H | -0.82283 | 3.840894 | 2.112929 |
| C | -0.99778 | 5.879933 | 2.790527 |
| H | 0.018454 | 5.905552 | 3.188194 |
| C | -1.82819 | 6.99822  | 2.899859 |
| H | -1.47398 | 7.900787 | 3.398123 |
| C | -2.51505 | 10.05976 | 1.725804 |
| O | -2.0697  | 10.13523 | 2.860203 |
| N | -1.92173 | 10.64211 | 0.651579 |
| H | -2.35952 | 10.55733 | -0.257   |
| C | -0.55099 | 11.1356  | 0.678878 |
| H | -0.3124  | 11.36331 | 1.725815 |
| C | 0.430536 | 10.11856 | 0.080923 |
| H | 0.12036  | 9.905487 | -0.95658 |
| H | 1.428417 | 10.58924 | 0.022349 |
| C | 0.533762 | 8.788838 | 0.845448 |
| H | -0.48921 | 8.396962 | 0.976054 |
| C | 1.296878 | 7.749206 | 0.024676 |
| H | 0.823859 | 7.59988  | -0.95637 |
| H | 2.342274 | 8.052982 | -0.14945 |
| H | 1.317396 | 6.784057 | 0.55246  |
| C | 1.153735 | 8.956481 | 2.235934 |
| H | 0.531656 | 9.588709 | 2.886178 |
| H | 1.271426 | 7.978387 | 2.727502 |
| H | 2.157156 | 9.411016 | 2.162613 |
| C | 4.698804 | 5.695406 | 4.325436 |
| H | 4.223975 | 6.167389 | 5.199581 |
| C | 4.076359 | 4.327824 | 4.018751 |

|   |          |          |          |
|---|----------|----------|----------|
| H | 4.783171 | 3.793556 | 3.362526 |
| H | 4.001596 | 3.732029 | 4.939059 |
| C | 2.764495 | 4.160412 | 3.258324 |
| O | 2.307822 | 5.061951 | 2.537207 |
| O | 2.306203 | 2.971691 | 3.34772  |
| C | 6.168443 | 5.366619 | 4.556195 |
| O | 7.009039 | 5.451871 | 3.665036 |
| N | 6.463048 | 4.735454 | 5.729021 |
| H | 5.776867 | 4.723611 | 6.473812 |
| C | 7.714853 | 4.018261 | 5.89348  |
| H | 8.579558 | 4.67998  | 5.740993 |
| C | 7.914829 | 2.849903 | 4.906271 |
| O | 9.02326  | 2.41803  | 4.663121 |
| N | 6.779981 | 2.373216 | 4.311596 |
| H | 5.883858 | 2.712821 | 4.632945 |
| C | 6.809202 | 1.406445 | 3.232147 |
| H | 7.394628 | 0.524983 | 3.538273 |
| C | 5.388997 | 0.949871 | 2.842591 |
| H | 5.474389 | 0.237897 | 2.010505 |
| H | 4.802938 | 1.814624 | 2.494846 |
| C | 4.654826 | 0.260762 | 3.972248 |
| O | 4.899583 | -0.91823 | 4.284    |
| N | 3.776934 | 1.022241 | 4.650421 |
| H | 3.285631 | 1.805448 | 4.172099 |
| H | 3.231865 | 0.550939 | 5.362795 |
| C | 7.516587 | 1.906185 | 1.954123 |
| O | 7.781869 | 1.068682 | 1.087138 |
| N | 7.776488 | 3.216056 | 1.829903 |
| H | 7.570561 | 3.852342 | 2.601177 |
| C | 8.603757 | 3.742245 | 0.750358 |
| H | 8.503241 | 3.07092  | -0.11203 |
| C | 8.233176 | 5.176087 | 0.35231  |
| H | 8.331638 | 5.828838 | 1.234194 |
| H | 8.985204 | 5.513643 | -0.37823 |
| C | 6.846794 | 5.309049 | -0.22871 |
| C | 6.603491 | 5.209856 | -1.60489 |
| H | 7.445094 | 5.08725  | -2.29315 |
| C | 5.306497 | 5.281001 | -2.12521 |
| H | 5.135673 | 5.217054 | -3.2019  |
| C | 4.220228 | 5.456955 | -1.25921 |
| O | 2.92855  | 5.487276 | -1.68153 |
| H | 2.781827 | 5.359368 | -2.65695 |
| C | 4.449882 | 5.597253 | 0.117124 |
| H | 3.616516 | 5.782356 | 0.794263 |
| C | 5.746379 | 5.516106 | 0.615936 |
| H | 5.92616  | 5.638645 | 1.684013 |
| C | -8.04751 | -3.06884 | -3.51858 |

|   |          |          |          |
|---|----------|----------|----------|
| C | -7.76163 | -3.11502 | -2.0242  |
| C | -6.76299 | -2.99503 | -4.37753 |
| O | -7.89768 | -2.11853 | -1.31081 |
| C | -5.75833 | -2.02868 | -3.84136 |
| C | -4.4431  | -2.20905 | -3.47257 |
| N | -6.0521  | -0.72235 | -3.49369 |
| C | -4.96136 | -0.17641 | -2.92892 |
| N | -3.96383 | -1.05095 | -2.89028 |
| H | -8.63995 | -3.94393 | -3.82825 |
| H | -7.05237 | -2.73963 | -5.41103 |
| H | -6.27965 | -3.98221 | -4.42746 |
| H | -3.82194 | -3.08964 | -3.604   |
| H | -4.95459 | 0.823612 | -2.51346 |
| H | -6.95383 | -0.23978 | -3.44182 |
| N | -7.32057 | -4.28719 | -1.52718 |
| H | -7.18986 | -5.11866 | -2.10325 |
| C | -7.01657 | -4.48229 | -0.13149 |
| H | -7.90329 | -4.33648 | 0.506854 |
| H | -6.27632 | -3.74823 | 0.223394 |
| C | -6.46416 | -5.89851 | 0.040284 |
| O | -6.27308 | -6.61151 | -0.94059 |
| N | -6.20446 | -6.25642 | 1.313199 |
| H | -6.47307 | -5.64022 | 2.087834 |
| C | -5.78806 | -7.59857 | 1.669272 |
| H | -5.84666 | -8.21585 | 0.761536 |
| C | -4.37931 | -7.65285 | 2.265594 |
| H | -3.64884 | -7.32224 | 1.506692 |
| H | -4.32307 | -6.92904 | 3.094801 |
| C | -4.03403 | -9.05249 | 2.771562 |
| H | -4.06705 | -9.77565 | 1.93891  |
| H | -4.80772 | -9.38388 | 3.487093 |
| C | -2.66454 | -9.17758 | 3.442441 |
| H | -2.49413 | -10.2182 | 3.757789 |
| H | -1.85518 | -8.94646 | 2.734173 |
| N | -2.5046  | -8.33024 | 4.622243 |
| H | -2.98333 | -8.62828 | 5.464408 |
| C | -1.87052 | -7.1459  | 4.67133  |
| N | -1.28147 | -6.61701 | 3.604655 |
| H | -1.29363 | -7.06483 | 2.700013 |
| H | -0.75907 | -5.73323 | 3.759294 |
| N | -1.81989 | -6.4592  | 5.821529 |
| H | -2.12892 | -6.87243 | 6.690604 |
| H | -1.26609 | -5.59141 | 5.826926 |
| C | 1.77205  | -4.61369 | -6.52414 |
| H | 2.546283 | -4.71273 | -7.29598 |
| H | 0.794488 | -4.63809 | -7.03194 |
| N | 1.973749 | -3.34382 | -5.84759 |

|    |          |          |          |
|----|----------|----------|----------|
| H  | 2.955893 | -2.94892 | -5.8443  |
| C  | 1.10944  | -2.84376 | -4.97409 |
| N  | -0.02653 | -3.49161 | -4.67293 |
| H  | -0.12348 | -4.46552 | -4.92944 |
| H  | -0.6311  | -3.18257 | -3.91011 |
| N  | 1.38309  | -1.67784 | -4.34131 |
| H  | 2.031462 | -0.99303 | -4.7735  |
| H  | 0.580454 | -1.24977 | -3.86109 |
| O  | -1.62098 | -3.99154 | -2.40171 |
| C  | -2.53887 | -3.87756 | -1.57721 |
| O  | -2.79351 | -2.77673 | -0.95506 |
| C  | -3.46294 | -5.02315 | -1.25183 |
| H  | -3.0931  | -5.96983 | -1.66158 |
| H  | -3.607   | -5.10211 | -0.16519 |
| O  | -1.02865 | -0.78221 | 0.016728 |
| O  | 0.451796 | -2.86962 | -0.81683 |
| Fe | -2.46722 | -0.88001 | -1.25744 |
| C  | 3.878158 | -1.58961 | -1.40839 |
| N  | 2.892888 | -2.62377 | -1.84549 |
| H  | 1.984694 | -2.61743 | -1.2827  |
| H  | 2.618312 | -2.46775 | -2.82914 |
| H  | 3.286624 | -3.56389 | -1.72632 |
| C  | 4.126172 | -1.69604 | 0.103952 |
| O  | 3.257761 | -2.35462 | 0.758529 |
| O  | 5.104342 | -1.08065 | 0.532529 |
| C  | 3.394795 | -0.17868 | -1.72623 |
| C  | 2.076403 | 0.241792 | -1.03223 |
| C  | 1.868333 | 1.720166 | -1.06546 |
| C  | 2.399157 | 2.59745  | 0.016643 |
| N  | 1.602045 | 3.853398 | 0.161788 |
| H  | 0.576721 | 3.650121 | 0.042354 |
| H  | 1.76471  | 4.319401 | 1.094517 |
| H  | 1.888779 | 4.530297 | -0.57601 |
| H  | 1.075339 | -9.16578 | 0.170984 |
| H  | -9.69643 | -2.61445 | 4.701549 |
| H  | -11.1373 | -1.34653 | 0.547163 |
| H  | -7.24242 | 4.779447 | -3.39041 |
| H  | -0.5056  | 12.08181 | 0.116872 |
| H  | -5.38996 | -4.59409 | 6.025707 |
| H  | -6.50552 | -8.00982 | 2.400381 |
| H  | -8.66786 | -2.17681 | -3.68253 |
| H  | -4.4506  | -4.81665 | -1.6911  |
| H  | 4.610404 | 6.377256 | 3.471044 |
| H  | 9.662865 | 3.711891 | 1.06316  |
| H  | 7.771154 | 3.628691 | 6.920139 |
| H  | 0.385063 | -2.97966 | 6.669272 |
| H  | 4.291624 | -5.79963 | 4.414849 |

|   |          |          |          |
|---|----------|----------|----------|
| H | 6.9312   | 2.796151 | -3.00283 |
| H | 10.23111 | 0.085063 | -2.18204 |
| H | 4.514598 | -5.62843 | -5.89321 |
| H | -0.06805 | -2.12769 | -0.41855 |
| H | -0.16569 | -3.28523 | -1.45095 |
| H | 2.388045 | 2.075659 | 0.980325 |
| H | 3.447106 | 2.908385 | -0.16159 |
| H | 1.501345 | 2.206483 | -1.97557 |
| H | -0.40662 | -0.04753 | -0.10595 |
| H | 2.075303 | -0.12111 | 0.007259 |
| H | 3.302111 | -0.04887 | -2.81011 |
| H | 4.207958 | 0.478156 | -1.38774 |
| H | 4.809505 | -1.78182 | -1.95866 |
| H | 1.858647 | -5.47599 | -5.83875 |
| O | -1.94714 | 1.486379 | 1.330569 |
| H | -1.89592 | 0.577207 | 0.983925 |
| H | -1.03348 | 1.639489 | 1.6707   |
| O | -1.15991 | -0.41497 | 3.496519 |
| H | -0.99066 | -0.98741 | 2.730229 |
| H | -1.86303 | 0.176119 | 3.176474 |
| O | -0.93883 | 3.219    | -0.55835 |
| H | -0.63094 | 3.017942 | -1.46725 |
| H | -1.39072 | 2.453005 | -0.14871 |
| O | 2.236196 | -0.83778 | 2.67566  |
| H | 2.70821  | -1.35746 | 1.97298  |
| H | 1.791633 | -0.06508 | 2.276114 |
| O | 0.580239 | 1.366054 | 2.304963 |
| H | 0.161237 | 0.882039 | 3.044141 |
| H | 1.144977 | 2.088877 | 2.721201 |
| O | -6.75122 | 5.228527 | -0.14065 |
| H | -5.92987 | 4.90739  | -0.55411 |
| H | -6.62846 | 6.194809 | -0.01476 |
| H | 1.236063 | -0.26706 | -1.53888 |

<sup>5</sup>TS2<sub>C,C5</sub>

|   |          |          |          |
|---|----------|----------|----------|
| C | 30.04273 | 41.48735 | 60.14723 |
| H | 30.28208 | 40.44714 | 60.4155  |
| C | 31.24888 | 42.41311 | 60.28731 |
| H | 30.94348 | 43.42031 | 59.96978 |
| H | 31.51342 | 42.50676 | 61.34684 |
| C | 32.50411 | 42.01124 | 59.52099 |
| H | 32.84195 | 40.99427 | 59.7831  |
| H | 32.33471 | 41.98835 | 58.43175 |
| C | 33.65288 | 42.97131 | 59.83142 |
| O | 33.57972 | 43.76275 | 60.77657 |
| N | 34.73788 | 42.90557 | 59.04151 |
| H | 34.90295 | 42.20044 | 58.31169 |
| H | 35.48333 | 43.56613 | 59.23381 |
| C | 28.85519 | 41.98762 | 60.96755 |
| O | 28.55317 | 43.18387 | 60.98576 |
| N | 28.14113 | 41.04639 | 61.62172 |
| H | 28.51639 | 40.10483 | 61.76879 |
| C | 26.86    | 41.32554 | 62.25679 |
| H | 26.34331 | 40.35795 | 62.35019 |
| C | 26.92663 | 42.00467 | 63.62853 |
| H | 27.30375 | 43.03061 | 63.48924 |
| H | 25.89007 | 42.10816 | 63.99397 |
| C | 27.77093 | 41.25546 | 64.6569  |
| H | 28.8177  | 41.19298 | 64.32007 |
| H | 27.42677 | 40.2122  | 64.7489  |
| C | 27.74185 | 41.91836 | 66.03393 |
| H | 28.02416 | 42.98549 | 65.94779 |
| H | 26.71269 | 41.89295 | 66.43824 |
| N | 28.65519 | 41.22885 | 66.93041 |
| H | 29.3459  | 40.59529 | 66.49576 |
| C | 28.96527 | 41.61301 | 68.16545 |
| N | 28.31805 | 42.65521 | 68.76005 |
| H | 27.39021 | 42.89307 | 68.43091 |
| H | 28.50111 | 42.75891 | 69.75974 |
| N | 29.9481  | 41.00421 | 68.8181  |
| H | 30.308   | 40.13186 | 68.39774 |
| H | 30.16042 | 41.29247 | 69.77661 |
| C | 31.10371 | 45.40978 | 66.85314 |
| H | 30.06551 | 45.73714 | 66.68833 |
| C | 31.33808 | 44.06547 | 66.12898 |
| H | 32.34405 | 43.69605 | 66.36986 |
| H | 30.63586 | 43.29396 | 66.47543 |
| C | 31.19577 | 44.25464 | 64.65579 |
| N | 32.16669 | 44.89952 | 63.90966 |
| C | 31.66611 | 45.04141 | 62.68967 |

|   |          |          |          |
|---|----------|----------|----------|
| H | 32.18749 | 45.45317 | 61.83001 |
| N | 30.41642 | 44.52474 | 62.61774 |
| H | 29.82023 | 44.38608 | 61.7937  |
| C | 30.10391 | 44.01075 | 63.85473 |
| H | 29.15517 | 43.53008 | 64.05011 |
| C | 31.42764 | 45.34307 | 68.32803 |
| O | 32.58158 | 45.42091 | 68.75051 |
| N | 30.36155 | 45.16047 | 69.15122 |
| H | 29.46811 | 44.9185  | 68.73569 |
| C | 30.50645 | 44.98164 | 70.5925  |
| H | 31.30003 | 45.67216 | 70.91413 |
| C | 29.21338 | 45.31293 | 71.31985 |
| H | 29.33938 | 45.18978 | 72.40447 |
| H | 28.39357 | 44.64791 | 71.00982 |
| H | 28.92022 | 46.35242 | 71.11484 |
| C | 30.98471 | 43.5394  | 70.85242 |
| O | 30.18041 | 42.61956 | 71.05479 |
| N | 32.31458 | 43.3969  | 70.76535 |
| H | 32.81218 | 44.2208  | 70.42328 |
| C | 33.07591 | 42.16028 | 70.83991 |
| H | 32.38672 | 41.30415 | 70.83511 |
| C | 34.07807 | 42.05865 | 69.67741 |
| H | 34.54614 | 43.05614 | 69.57164 |
| C | 35.1887  | 41.0561  | 69.9967  |
| H | 35.74218 | 41.34108 | 70.90749 |
| H | 34.75822 | 40.05248 | 70.12483 |
| H | 35.9009  | 41.00567 | 69.16367 |
| C | 33.37223 | 41.71514 | 68.3631  |
| H | 32.55363 | 42.41513 | 68.15274 |
| H | 32.95242 | 40.7014  | 68.41355 |
| H | 34.08032 | 41.74756 | 67.52193 |
| C | 33.72895 | 33.52396 | 68.73231 |
| H | 34.63212 | 33.05217 | 68.31504 |
| C | 32.59384 | 33.41819 | 67.71338 |
| H | 32.95746 | 33.83237 | 66.75574 |
| C | 32.19149 | 31.96752 | 67.4725  |
| H | 31.35898 | 31.90894 | 66.75247 |
| H | 31.84716 | 31.50399 | 68.40962 |
| H | 33.0363  | 31.3859  | 67.07263 |
| O | 31.50391 | 34.19156 | 68.18903 |
| H | 30.92863 | 34.43227 | 67.42229 |
| C | 34.04098 | 34.9492  | 69.10906 |
| O | 34.23589 | 35.26781 | 70.30008 |
| N | 34.06445 | 35.87685 | 68.1385  |
| H | 33.89935 | 35.6475  | 67.15381 |
| C | 34.04577 | 37.28867 | 68.4447  |
| H | 34.91778 | 37.5973  | 69.03611 |

|   |          |          |          |
|---|----------|----------|----------|
| H | 34.07888 | 37.84336 | 67.49698 |
| C | 32.7717  | 37.74424 | 69.17244 |
| O | 32.77303 | 38.80421 | 69.80825 |
| N | 31.71094 | 36.93895 | 69.0296  |
| H | 31.81151 | 36.02686 | 68.56942 |
| C | 30.37348 | 37.27839 | 69.46734 |
| H | 30.445   | 38.14638 | 70.13751 |
| C | 29.49384 | 37.5983  | 68.25664 |
| H | 29.3644  | 36.70185 | 67.63138 |
| H | 28.49874 | 37.91986 | 68.60628 |
| O | 30.03265 | 38.65443 | 67.48955 |
| H | 30.80619 | 38.40002 | 66.93426 |
| C | 40.18657 | 34.06067 | 71.03256 |
| H | 39.9971  | 33.08712 | 70.5566  |
| C | 38.99332 | 34.99851 | 70.84676 |
| H | 39.12492 | 35.87564 | 71.49985 |
| H | 38.08823 | 34.47736 | 71.20571 |
| C | 38.74882 | 35.48967 | 69.40972 |
| H | 39.56518 | 36.18977 | 69.15883 |
| C | 38.77903 | 34.36067 | 68.37422 |
| H | 39.78221 | 33.9194  | 68.28375 |
| H | 38.49697 | 34.745   | 67.38465 |
| H | 38.05806 | 33.56462 | 68.62815 |
| C | 37.42761 | 36.25732 | 69.3593  |
| H | 37.24735 | 36.68769 | 68.36674 |
| H | 37.41383 | 37.07686 | 70.09316 |
| H | 36.58358 | 35.59573 | 69.59857 |
| C | 41.48745 | 34.64962 | 70.52332 |
| O | 41.82676 | 35.81277 | 70.74587 |
| N | 42.28744 | 33.80172 | 69.83583 |
| H | 41.9353  | 32.88545 | 69.59095 |
| C | 43.54936 | 34.22894 | 69.29945 |
| H | 44.12974 | 34.74223 | 70.08218 |
| C | 43.40995 | 35.17577 | 68.10009 |
| O | 42.335   | 35.37553 | 67.5411  |
| N | 44.56921 | 35.75822 | 67.73702 |
| H | 45.42551 | 35.43914 | 68.17395 |
| C | 44.66546 | 36.59104 | 66.55785 |
| H | 44.04037 | 37.48347 | 66.67199 |
| C | 44.25255 | 35.82395 | 65.29793 |
| O | 44.53887 | 34.64833 | 65.1393  |
| N | 43.57022 | 36.56753 | 64.39177 |
| C | 43.10571 | 35.96024 | 63.16851 |
| C | 42.80771 | 37.05193 | 62.14386 |
| C | 41.86705 | 35.03865 | 63.40043 |
| O | 42.5661  | 38.21645 | 62.46864 |
| C | 40.70256 | 35.74625 | 64.00348 |



|   |          |          |          |
|---|----------|----------|----------|
| C | 39.53738 | 36.23771 | 63.4519  |
| N | 40.65284 | 36.10765 | 65.33994 |
| C | 39.51588 | 36.79185 | 65.5551  |
| N | 38.80918 | 36.89085 | 64.43106 |
| H | 43.18831 | 37.47739 | 64.65822 |
| H | 43.90605 | 35.30958 | 62.78477 |
| H | 41.57362 | 34.57586 | 62.44831 |
| H | 42.21483 | 34.23362 | 64.06494 |
| H | 39.1991  | 36.16585 | 62.4208  |
| H | 39.22115 | 37.21191 | 66.51104 |
| H | 41.36606 | 35.91358 | 66.05796 |
| N | 42.80199 | 36.63254 | 60.86044 |
| H | 42.78967 | 35.6269  | 60.65871 |
| C | 42.29439 | 37.48344 | 59.81145 |
| H | 42.7163  | 38.49236 | 59.91421 |
| C | 40.76626 | 37.53308 | 59.84058 |
| O | 40.089   | 36.52058 | 60.04896 |
| N | 40.19981 | 38.73814 | 59.65805 |
| C | 38.75694 | 38.87816 | 59.66597 |
| C | 38.1667  | 38.45403 | 58.31863 |
| C | 38.36142 | 40.32919 | 59.97494 |
| O | 38.68858 | 38.7803  | 57.26725 |
| C | 36.90668 | 40.48665 | 60.43174 |
| C | 36.66222 | 39.98206 | 61.83717 |
| O | 36.10088 | 40.73451 | 62.67185 |
| O | 37.03457 | 38.79734 | 62.12172 |
| H | 40.76995 | 39.5162  | 59.34536 |
| H | 38.38311 | 38.2181  | 60.45279 |
| H | 39.03633 | 40.71649 | 60.75595 |
| H | 38.52035 | 40.9376  | 59.0704  |
| H | 36.23548 | 39.93031 | 59.76178 |
| H | 36.59586 | 41.53544 | 60.37064 |
| N | 36.99415 | 37.76208 | 58.39208 |
| H | 36.73347 | 37.29552 | 59.26447 |
| C | 36.27145 | 37.43463 | 57.17177 |
| H | 35.42519 | 36.79743 | 57.47121 |
| C | 35.75179 | 38.68098 | 56.42475 |
| H | 36.54595 | 39.09604 | 55.79774 |
| H | 34.92998 | 38.37598 | 55.75835 |
| C | 35.27128 | 39.79891 | 57.32341 |
| O | 34.34665 | 39.5288  | 58.24571 |
| O | 35.70293 | 40.93132 | 57.234   |
| C | 37.14119 | 36.60279 | 56.20326 |
| O | 37.06963 | 36.75461 | 54.99518 |
| N | 37.93841 | 35.66969 | 56.79257 |
| H | 38.02519 | 35.7176  | 57.80261 |
| C | 39.06288 | 35.07755 | 56.06965 |

|   |          |          |          |
|---|----------|----------|----------|
| H | 39.57413 | 35.87808 | 55.50922 |
| C | 40.04479 | 34.44397 | 57.05155 |
| H | 40.87221 | 33.99745 | 56.48476 |
| H | 39.54982 | 33.64737 | 57.63262 |
| H | 40.44695 | 35.19219 | 57.74921 |
| C | 38.68046 | 34.05692 | 54.98343 |
| O | 39.54555 | 33.65176 | 54.22759 |
| N | 37.38082 | 33.67081 | 54.94102 |
| H | 36.74119 | 34.0338  | 55.63803 |
| C | 36.84704 | 32.81549 | 53.89954 |
| H | 37.7155  | 32.48263 | 53.31049 |
| C | 36.13381 | 31.57969 | 54.48102 |
| H | 36.86932 | 31.01218 | 55.07144 |
| H | 35.82114 | 30.95668 | 53.63359 |
| C | 34.93566 | 31.93508 | 55.32991 |
| C | 35.07893 | 32.27123 | 56.68766 |
| H | 36.06989 | 32.22167 | 57.14917 |
| C | 33.97004 | 32.63169 | 57.45935 |
| H | 34.07643 | 32.87133 | 58.51951 |
| C | 32.69513 | 32.65246 | 56.88609 |
| H | 31.83844 | 32.90093 | 57.51171 |
| C | 32.54151 | 32.31753 | 55.53884 |
| H | 31.54778 | 32.31862 | 55.08475 |
| C | 33.65051 | 31.97046 | 54.76548 |
| H | 33.53412 | 31.73136 | 53.70767 |
| C | 35.90804 | 33.56615 | 52.9278  |
| O | 35.15867 | 32.9382  | 52.19117 |
| N | 35.98807 | 34.91546 | 52.96311 |
| H | 36.6167  | 35.3652  | 53.62395 |
| C | 35.10699 | 35.78254 | 52.20519 |
| H | 34.56836 | 35.15065 | 51.48695 |
| C | 34.14153 | 36.55338 | 53.11427 |
| H | 34.74588 | 37.1799  | 53.79208 |
| H | 33.5498  | 37.24603 | 52.48842 |
| C | 33.19077 | 35.67553 | 53.9435  |
| H | 33.80418 | 34.95058 | 54.50761 |
| C | 32.42558 | 36.51958 | 54.96791 |
| H | 33.11301 | 37.06544 | 55.63463 |
| H | 31.78008 | 37.26388 | 54.47023 |
| H | 31.78465 | 35.88635 | 55.60278 |
| C | 32.22907 | 34.87901 | 53.05661 |
| H | 32.76935 | 34.16406 | 52.41955 |
| H | 31.51756 | 34.30389 | 53.66766 |
| H | 31.64526 | 35.55371 | 52.40684 |
| C | 29.50216 | 31.87727 | 60.71078 |
| H | 29.1625  | 30.84065 | 60.86344 |
| C | 30.77796 | 32.13364 | 61.53989 |

|   |          |          |          |
|---|----------|----------|----------|
| H | 30.54052 | 32.27082 | 62.60501 |
| H | 31.41904 | 31.24006 | 61.46861 |
| C | 31.62928 | 33.29567 | 61.00512 |
| O | 31.86637 | 33.32913 | 59.79586 |
| O | 32.07606 | 34.14563 | 61.8608  |
| C | 28.3805  | 32.82856 | 61.08068 |
| O | 28.15639 | 33.88364 | 60.48639 |
| N | 27.66805 | 32.4864  | 62.19352 |
| H | 27.83485 | 31.57872 | 62.61109 |
| C | 26.5434  | 33.27089 | 62.66886 |
| H | 25.80252 | 33.42567 | 61.86876 |
| C | 26.89051 | 34.67402 | 63.18023 |
| O | 26.02372 | 35.50204 | 63.38364 |
| N | 28.21933 | 34.93015 | 63.32686 |
| H | 28.88054 | 34.17978 | 63.16747 |
| C | 28.72372 | 36.25242 | 63.6111  |
| H | 28.20475 | 36.66737 | 64.4894  |
| C | 30.22987 | 36.17474 | 63.88127 |
| H | 30.57568 | 37.15147 | 64.24442 |
| H | 30.73763 | 35.92549 | 62.94381 |
| C | 30.58088 | 35.12632 | 64.92177 |
| O | 30.26612 | 35.27713 | 66.10878 |
| N | 31.20243 | 34.04089 | 64.43933 |
| H | 31.61114 | 34.03339 | 63.47782 |
| H | 31.55432 | 33.35235 | 65.0955  |
| C | 28.46181 | 37.26839 | 62.47812 |
| O | 28.69132 | 38.46312 | 62.68523 |
| N | 28.00471 | 36.77978 | 61.3092  |
| H | 27.89142 | 35.76889 | 61.20819 |
| C | 27.4053  | 37.61776 | 60.28659 |
| H | 27.78535 | 38.63974 | 60.41063 |
| C | 27.68639 | 37.11396 | 58.85787 |
| H | 27.27842 | 36.09827 | 58.7439  |
| H | 27.14686 | 37.77524 | 58.16171 |
| C | 29.15277 | 37.1134  | 58.55974 |
| C | 29.81694 | 38.31532 | 58.17624 |
| H | 29.21984 | 39.21071 | 57.98681 |
| C | 31.18524 | 38.36984 | 58.06903 |
| H | 31.70642 | 39.29182 | 57.80617 |
| C | 31.97181 | 37.19204 | 58.36959 |
| O | 33.24235 | 37.23152 | 58.45383 |
| H | 33.76064 | 38.17858 | 58.30364 |
| C | 31.28309 | 35.96098 | 58.66161 |
| H | 31.85931 | 35.05197 | 58.85604 |
| C | 29.91367 | 35.93782 | 58.76871 |
| H | 29.40802 | 35.01434 | 59.05909 |
| C | 42.85184 | 40.98124 | 66.04978 |

|   |          |          |          |
|---|----------|----------|----------|
| C | 42.41505 | 39.69295 | 66.7298  |
| C | 41.65367 | 41.80094 | 65.52524 |
| O | 42.37449 | 38.62591 | 66.1118  |
| C | 40.65564 | 40.97684 | 64.78239 |
| C | 39.3133  | 40.77935 | 65.01692 |
| N | 40.95447 | 40.16685 | 63.70126 |
| C | 39.83128 | 39.52397 | 63.32947 |
| N | 38.81099 | 39.86689 | 64.10874 |
| H | 43.44985 | 41.60466 | 66.732   |
| H | 42.03731 | 42.62079 | 64.89466 |
| H | 41.12595 | 42.27679 | 66.36544 |
| H | 38.69224 | 41.2442  | 65.77617 |
| H | 39.81387 | 38.78987 | 62.5311  |
| H | 41.86568 | 39.87995 | 63.33814 |
| N | 42.06264 | 39.78681 | 68.02497 |
| H | 41.94536 | 40.69378 | 68.47417 |
| C | 41.60191 | 38.67013 | 68.81817 |
| H | 42.42949 | 38.0164  | 69.13976 |
| H | 40.92679 | 38.02836 | 68.22929 |
| C | 40.86614 | 39.24062 | 70.03422 |
| O | 40.54745 | 40.42701 | 70.06451 |
| N | 40.60979 | 38.37054 | 71.0304  |
| H | 40.99259 | 37.41795 | 70.98145 |
| C | 39.98248 | 38.82997 | 72.25737 |
| H | 40.32368 | 39.85823 | 72.45343 |
| C | 38.45138 | 38.80915 | 72.20762 |
| H | 38.1158  | 39.36341 | 71.3162  |
| H | 38.11464 | 37.76774 | 72.07803 |
| C | 37.81086 | 39.41233 | 73.45756 |
| H | 38.00803 | 40.49639 | 73.49945 |
| H | 38.27502 | 38.98854 | 74.36767 |
| C | 36.29677 | 39.19725 | 73.5312  |
| H | 35.86664 | 39.74463 | 74.38415 |
| H | 35.81839 | 39.58723 | 72.62295 |
| N | 35.95833 | 37.77919 | 73.6598  |
| H | 36.35998 | 37.29473 | 74.4553  |
| C | 35.40582 | 37.01082 | 72.70562 |
| N | 34.73382 | 37.52142 | 71.68282 |
| H | 34.34853 | 38.45803 | 71.6627  |
| H | 34.40077 | 36.83065 | 70.98582 |
| N | 35.52465 | 35.67477 | 72.76987 |
| H | 36.1976  | 35.23793 | 73.38434 |
| H | 35.06265 | 35.11841 | 72.04384 |
| C | 35.01569 | 44.617   | 66.47226 |
| H | 34.24304 | 45.26339 | 66.90572 |
| H | 35.99059 | 45.12704 | 66.53985 |
| N | 34.67544 | 44.30734 | 65.09428 |

|    |          |          |          |
|----|----------|----------|----------|
| H  | 33.82501 | 44.72735 | 64.65068 |
| C  | 35.36584 | 43.449   | 64.34804 |
| N  | 36.35273 | 42.69703 | 64.889   |
| H  | 36.31369 | 42.42468 | 65.86815 |
| H  | 36.76539 | 41.99508 | 64.27908 |
| N  | 35.13031 | 43.32611 | 63.04143 |
| H  | 34.42888 | 43.86202 | 62.52966 |
| H  | 35.50923 | 42.49708 | 62.57695 |
| O  | 36.28636 | 40.44538 | 66.71515 |
| C  | 37.0566  | 39.49586 | 66.98777 |
| O  | 37.06902 | 38.38221 | 66.35658 |
| C  | 38.08404 | 39.65689 | 68.08871 |
| H  | 37.97092 | 38.858   | 68.8329  |
| H  | 39.08678 | 39.55016 | 67.65116 |
| O  | 35.41036 | 37.56218 | 64.02808 |
| O  | 33.45339 | 36.31341 | 65.37015 |
| Fe | 37.26667 | 38.33512 | 64.23343 |
| C  | 33.09824 | 40.64956 | 64.62857 |
| N  | 34.41479 | 39.98965 | 64.75547 |
| H  | 34.37553 | 38.95587 | 64.67644 |
| H  | 35.05819 | 40.28575 | 63.98851 |
| H  | 34.94129 | 40.17985 | 65.64566 |
| C  | 32.00775 | 39.93868 | 65.46021 |
| O  | 32.23218 | 38.74963 | 65.84651 |
| O  | 30.98113 | 40.61111 | 65.62744 |
| C  | 32.65083 | 40.77006 | 63.16478 |
| C  | 32.2182  | 39.46948 | 62.47056 |
| C  | 33.24829 | 38.52621 | 61.9261  |
| C  | 32.82185 | 37.09794 | 61.8881  |
| N  | 33.60794 | 36.14405 | 61.07741 |
| H  | 34.62926 | 36.16301 | 61.27476 |
| H  | 33.14511 | 35.18293 | 61.27901 |
| H  | 33.54062 | 36.36023 | 60.06612 |
| H  | 33.62021 | 42.13784 | 71.80136 |
| H  | 44.12141 | 33.34445 | 68.98003 |
| H  | 45.71231 | 36.90634 | 66.4413  |
| H  | 42.60572 | 37.07361 | 58.83845 |
| H  | 35.71173 | 36.49943 | 51.62531 |
| H  | 40.33391 | 33.85802 | 72.10748 |
| H  | 40.34232 | 38.19402 | 73.08175 |
| H  | 43.50361 | 40.68355 | 65.21582 |
| H  | 38.02424 | 40.63129 | 68.58485 |
| H  | 29.73733 | 32.00626 | 59.64629 |
| H  | 26.31188 | 37.65499 | 60.43644 |
| H  | 26.04073 | 32.72261 | 63.47797 |
| H  | 33.45332 | 33.01009 | 69.66395 |
| H  | 29.94528 | 36.43376 | 70.0317  |

|   |          |          |          |
|---|----------|----------|----------|
| H | 29.70212 | 41.46342 | 59.0965  |
| H | 26.27133 | 41.96051 | 61.57771 |
| H | 31.76008 | 46.17176 | 66.40898 |
| H | 34.24928 | 36.73065 | 64.94791 |
| H | 32.86532 | 37.08337 | 65.5303  |
| H | 32.79273 | 36.69569 | 62.91471 |
| H | 31.78339 | 37.02966 | 61.5141  |
| H | 35.0634  | 37.8277  | 63.16175 |
| H | 34.02101 | 38.89799 | 61.24405 |
| H | 31.51571 | 38.92447 | 63.12106 |
| H | 31.59326 | 39.76809 | 61.60745 |
| H | 33.42496 | 41.2882  | 62.58099 |
| H | 31.78245 | 41.44185 | 63.19478 |
| H | 33.20153 | 41.66702 | 65.02916 |
| H | 35.04963 | 43.71192 | 67.10014 |
| O | 36.22194 | 35.10415 | 63.28549 |
| H | 35.85125 | 35.97947 | 63.56364 |
| H | 35.51276 | 34.46126 | 63.54602 |
| O | 36.57775 | 35.55154 | 66.08582 |
| H | 36.68539 | 36.49553 | 66.29952 |
| H | 36.76169 | 35.45856 | 65.1304  |
| O | 36.39714 | 36.45312 | 60.9686  |
| H | 36.66534 | 37.29172 | 61.40827 |
| H | 36.56711 | 35.75586 | 61.64866 |
| O | 34.21237 | 33.7176  | 64.48459 |
| H | 33.79589 | 34.54035 | 64.80728 |
| H | 34.74334 | 33.38501 | 65.24244 |
| O | 35.91757 | 33.05825 | 66.59312 |
| H | 36.22479 | 33.9988  | 66.59209 |
| H | 36.68032 | 32.54642 | 66.29179 |
| O | 41.63554 | 34.25245 | 60.15281 |
| H | 40.89165 | 34.88441 | 60.05161 |
| H | 41.47852 | 33.52699 | 59.53567 |

<sup>5</sup>Pr<sub>C,C5</sub>

|   |          |          |          |
|---|----------|----------|----------|
| C | 7.331513 | 1.274535 | -2.8222  |
| H | 6.811787 | 1.597536 | -1.90707 |
| C | 6.342839 | 0.769653 | -3.8662  |
| H | 6.889781 | 0.47797  | -4.77312 |
| H | 5.861128 | -0.14465 | -3.49389 |
| C | 5.267046 | 1.786022 | -4.22207 |
| H | 4.820832 | 2.220165 | -3.31321 |
| H | 5.699015 | 2.64062  | -4.77191 |
| C | 4.146567 | 1.199019 | -5.06855 |
| O | 4.256301 | 0.099607 | -5.62799 |
| N | 3.032557 | 1.943244 | -5.13382 |
| H | 2.902072 | 2.823814 | -4.60983 |
| H | 2.268086 | 1.625904 | -5.71813 |
| C | 8.400793 | 0.245365 | -2.48019 |
| O | 8.949855 | -0.44164 | -3.34997 |
| N | 8.722307 | 0.174256 | -1.17649 |
| H | 8.099374 | 0.605585 | -0.48106 |
| C | 9.78069  | -0.67384 | -0.65745 |
| H | 10.00656 | -0.30386 | 0.354376 |
| C | 9.432809 | -2.16663 | -0.59354 |
| H | 9.502098 | -2.59079 | -1.60802 |
| H | 10.21156 | -2.66603 | 0.008905 |
| C | 8.0486   | -2.45167 | -0.01166 |
| H | 7.272131 | -2.14686 | -0.73154 |
| H | 7.871077 | -1.8488  | 0.894847 |
| C | 7.853911 | -3.93075 | 0.309656 |
| H | 8.132197 | -4.55114 | -0.56086 |
| H | 8.529979 | -4.22253 | 1.136732 |
| N | 6.465587 | -4.19226 | 0.647236 |
| H | 5.848588 | -3.4079  | 0.930507 |
| C | 5.885705 | -5.38961 | 0.656798 |
| N | 6.61768  | -6.5281  | 0.593044 |
| H | 7.566603 | -6.51511 | 0.947207 |
| H | 6.079763 | -7.39895 | 0.674856 |
| N | 4.557899 | -5.46284 | 0.69873  |
| H | 4.034372 | -4.65488 | 0.324346 |
| H | 4.121714 | -6.37744 | 0.7972   |
| C | 5.533077 | -6.47698 | -3.86437 |
| H | 6.596255 | -6.69613 | -4.05163 |
| C | 5.418191 | -5.22094 | -2.9731  |
| H | 4.371631 | -5.04395 | -2.68554 |
| H | 5.965828 | -5.38943 | -2.03503 |
| C | 5.964875 | -4.00426 | -3.64082 |
| N | 5.278715 | -3.32385 | -4.63109 |
| C | 6.077243 | -2.34335 | -5.03375 |

|   |          |          |          |
|---|----------|----------|----------|
| H | 5.812418 | -1.57062 | -5.75162 |
| N | 7.248832 | -2.36485 | -4.35761 |
| H | 7.972752 | -1.62985 | -4.32743 |
| C | 7.194384 | -3.40888 | -3.46412 |
| H | 8.017794 | -3.6348  | -2.79537 |
| C | 4.844503 | -7.66283 | -3.22443 |
| O | 3.691938 | -7.99391 | -3.48852 |
| N | 5.57744  | -8.31022 | -2.27313 |
| H | 6.485307 | -7.94338 | -2.01097 |
| C | 5.021552 | -9.40603 | -1.49292 |
| H | 4.466057 | -10.0498 | -2.19144 |
| C | 6.124884 | -10.211  | -0.82134 |
| H | 5.699752 | -11.0485 | -0.25052 |
| H | 6.699279 | -9.5889  | -0.11867 |
| H | 6.81089  | -10.6172 | -1.57854 |
| C | 4.027434 | -8.8309  | -0.46782 |
| O | 4.419393 | -8.3287  | 0.594872 |
| N | 2.740249 | -8.89375 | -0.83939 |
| H | 2.582094 | -9.12201 | -1.81924 |
| C | 1.623162 | -8.34591 | -0.08925 |
| H | 2.018326 | -7.94081 | 0.854023 |
| C | 0.867876 | -7.25745 | -0.86601 |
| H | 0.596313 | -7.68435 | -1.85029 |
| C | -0.42448 | -6.8937  | -0.13327 |
| H | -1.08534 | -7.76646 | -0.00888 |
| H | -0.18905 | -6.47117 | 0.855736 |
| H | -0.97593 | -6.12559 | -0.68981 |
| C | 1.732961 | -6.01865 | -1.08983 |
| H | 2.664839 | -6.26619 | -1.61497 |
| H | 1.972921 | -5.55104 | -0.12612 |
| H | 1.188161 | -5.27284 | -1.68274 |
| C | -0.72571 | -1.35796 | 5.403336 |
| H | -1.61454 | -0.77535 | 5.113134 |
| C | 0.511801 | -0.45575 | 5.34819  |
| H | 0.481557 | 0.102462 | 4.39217  |
| C | 0.510963 | 0.553658 | 6.492321 |
| H | 1.410162 | 1.188823 | 6.45286  |
| H | 0.521827 | 0.030319 | 7.460609 |
| H | -0.37437 | 1.207507 | 6.450272 |
| O | 1.657121 | -1.28679 | 5.384909 |
| H | 2.440674 | -0.73747 | 5.130433 |
| C | -0.61691 | -2.54945 | 4.486661 |
| O | -0.96453 | -3.68853 | 4.856212 |
| N | -0.13136 | -2.32776 | 3.254942 |
| H | 0.229818 | -1.40209 | 3.000555 |
| C | 0.209456 | -3.39691 | 2.3485   |
| H | -0.6129  | -4.11473 | 2.252147 |



|   |          |          |          |
|---|----------|----------|----------|
| H | 0.390061 | -2.9685  | 1.353003 |
| C | 1.494209 | -4.1561  | 2.698478 |
| O | 1.670241 | -5.28963 | 2.237255 |
| N | 2.372754 | -3.48546 | 3.459174 |
| H | 2.071267 | -2.62263 | 3.926261 |
| C | 3.730302 | -3.93496 | 3.718137 |
| H | 3.888229 | -4.85323 | 3.138487 |
| C | 4.745723 | -2.85769 | 3.334733 |
| H | 4.588293 | -1.9546  | 3.946425 |
| H | 5.756818 | -3.23807 | 3.555296 |
| O | 4.722644 | -2.51786 | 1.959611 |
| H | 3.807427 | -2.36691 | 1.62913  |
| C | -5.67472 | -4.13651 | 4.849702 |
| H | -5.72603 | -3.21826 | 5.453675 |
| C | -4.47878 | -4.09971 | 3.8938   |
| H | -4.35103 | -5.09766 | 3.450264 |
| H | -3.56371 | -3.90171 | 4.476177 |
| C | -4.5784  | -3.07439 | 2.753524 |
| H | -5.42009 | -3.37777 | 2.108458 |
| C | -4.87698 | -1.66238 | 3.264994 |
| H | -5.89961 | -1.58023 | 3.659007 |
| H | -4.79288 | -0.92857 | 2.451887 |
| H | -4.16465 | -1.36986 | 4.053371 |
| C | -3.29907 | -3.10874 | 1.915418 |
| H | -3.39489 | -2.51666 | 0.996562 |
| H | -3.04022 | -4.14141 | 1.63052  |
| H | -2.4556  | -2.68912 | 2.479492 |
| C | -6.99032 | -4.36919 | 4.127502 |
| O | -7.12754 | -5.24837 | 3.276071 |
| N | -8.01632 | -3.56675 | 4.502839 |
| H | -7.8154  | -2.7966  | 5.129107 |
| C | -9.28025 | -3.56455 | 3.816193 |
| H | -9.44957 | -4.5756  | 3.41503  |
| C | -9.28586 | -2.58741 | 2.633417 |
| O | -8.23435 | -2.25006 | 2.094149 |
| N | -10.5011 | -2.18733 | 2.218933 |
| H | -11.3084 | -2.40077 | 2.791592 |
| C | -10.6659 | -1.30221 | 1.081269 |
| H | -10.3309 | -1.80473 | 0.163741 |
| C | -9.90324 | 0.014731 | 1.288101 |
| O | -9.88719 | 0.588356 | 2.363387 |
| N | -9.27146 | 0.463776 | 0.175049 |
| C | -8.48197 | 1.677615 | 0.155381 |
| C | -8.12129 | 1.949736 | -1.31667 |
| C | -7.23633 | 1.568449 | 1.08867  |
| O | -8.27379 | 1.066329 | -2.16668 |
| C | -6.2641  | 0.531078 | 0.63839  |

|   |          |          |          |
|---|----------|----------|----------|
| C | -4.97079 | 0.66483  | 0.186393 |
| N | -6.59192 | -0.79495 | 0.405559 |
| C | -5.55429 | -1.39637 | -0.19366 |
| N | -4.54742 | -0.53247 | -0.3584  |
| H | -9.22886 | -0.10658 | -0.6672  |
| H | -9.08577 | 2.515898 | 0.538913 |
| H | -6.72881 | 2.542469 | 1.131857 |
| H | -7.63579 | 1.353758 | 2.090919 |
| H | -4.35769 | 1.556697 | 0.176188 |
| H | -5.56121 | -2.43161 | -0.52091 |
| H | -7.43722 | -1.28592 | 0.734143 |
| N | -7.6558  | 3.180409 | -1.61237 |
| H | -7.31071 | 3.7976   | -0.8566  |
| C | -7.10615 | 3.440358 | -2.92253 |
| H | -7.68621 | 2.888515 | -3.6775  |
| C | -5.65212 | 2.969549 | -2.99043 |
| O | -5.20635 | 2.297601 | -2.0506  |
| N | -4.90008 | 3.232321 | -4.07201 |
| C | -3.49352 | 2.831438 | -4.06427 |
| C | -2.64182 | 4.091402 | -3.89341 |
| C | -3.0806  | 1.969927 | -5.25812 |
| O | -2.77206 | 5.057174 | -4.63115 |
| C | -1.6508  | 1.426381 | -5.12539 |
| C | -1.35183 | 0.48926  | -3.96712 |
| O | -0.35456 | -0.26131 | -4.03993 |
| O | -2.10573 | 0.531921 | -2.92652 |
| H | -5.20876 | 3.899464 | -4.77427 |
| H | -3.3846  | 2.214804 | -3.17575 |
| H | -3.79846 | 1.137861 | -5.3448  |
| H | -3.14445 | 2.561551 | -6.18544 |
| H | -0.92512 | 2.248768 | -4.99265 |
| H | -1.35315 | 0.905606 | -6.04745 |
| N | -1.83124 | 4.04613  | -2.81155 |
| H | -1.65351 | 3.143692 | -2.38949 |
| C | -0.95306 | 5.139056 | -2.42978 |
| H | -0.5613  | 4.87512  | -1.43375 |
| C | 0.220557 | 5.346375 | -3.39555 |
| H | -0.18472 | 5.594433 | -4.39006 |
| H | 0.818274 | 6.208838 | -3.07638 |
| C | 1.108084 | 4.110188 | -3.53273 |
| O | 2.35056  | 4.275546 | -3.68881 |
| O | 0.563929 | 2.967392 | -3.48905 |
| C | -1.78275 | 6.427292 | -2.2179  |
| O | -1.32584 | 7.542875 | -2.42078 |
| N | -3.04395 | 6.199876 | -1.7781  |
| H | -3.29346 | 5.268316 | -1.44555 |
| C | -4.09125 | 7.197198 | -1.88766 |

|   |          |          |          |
|---|----------|----------|----------|
| H | -3.66495 | 8.011417 | -2.49183 |
| C | -5.31941 | 6.628728 | -2.58313 |
| H | -6.09777 | 7.397865 | -2.6884  |
| H | -5.74044 | 5.809073 | -1.98658 |
| H | -5.02971 | 6.263692 | -3.57832 |
| C | -4.42102 | 7.783464 | -0.50518 |
| O | -5.45882 | 7.523574 | 0.102785 |
| N | -3.45753 | 8.612408 | -0.0548  |
| H | -2.56824 | 8.566433 | -0.54973 |
| C | -3.50231 | 9.346453 | 1.204768 |
| H | -4.41563 | 9.967826 | 1.195025 |
| C | -3.57907 | 8.442225 | 2.452506 |
| H | -4.59428 | 8.027559 | 2.494879 |
| H | -3.43342 | 9.099305 | 3.321004 |
| C | -2.56972 | 7.319861 | 2.463056 |
| C | -2.95247 | 6.016876 | 2.10912  |
| H | -3.99218 | 5.818635 | 1.838878 |
| C | -2.02398 | 4.971625 | 2.129238 |
| H | -2.35202 | 3.957119 | 1.893807 |
| C | -0.69217 | 5.218708 | 2.473044 |
| H | 0.023019 | 4.399936 | 2.525416 |
| C | -0.29435 | 6.518017 | 2.803252 |
| H | 0.748295 | 6.718933 | 3.054884 |
| C | -1.22901 | 7.554341 | 2.812518 |
| H | -0.92508 | 8.562636 | 3.094032 |
| C | -2.29749 | 10.31415 | 1.277475 |
| O | -1.80553 | 10.62299 | 2.349348 |
| N | -1.84033 | 10.77148 | 0.081126 |
| H | -2.33722 | 10.50704 | -0.76017 |
| C | -0.52754 | 11.38047 | -0.09006 |
| H | -0.23539 | 11.79513 | 0.883374 |
| C | 0.50135  | 10.36287 | -0.60194 |
| H | 0.137991 | 9.94885  | -1.55956 |
| H | 1.439822 | 10.89952 | -0.8293  |
| C | 0.795613 | 9.203338 | 0.363948 |
| H | -0.17076 | 8.753566 | 0.652209 |
| C | 1.594783 | 8.097314 | -0.32777 |
| H | 1.066037 | 7.725687 | -1.21862 |
| H | 2.587476 | 8.453459 | -0.6498  |
| H | 1.757542 | 7.258117 | 0.365225 |
| C | 1.494917 | 9.672521 | 1.644078 |
| H | 0.853858 | 10.34117 | 2.237548 |
| H | 1.775696 | 8.8147   | 2.272571 |
| H | 2.425497 | 10.21357 | 1.399372 |
| C | 5.386649 | 5.930213 | 4.531054 |
| H | 4.969463 | 6.355178 | 5.45662  |
| C | 4.421003 | 4.921761 | 3.89345  |

|   |          |          |          |
|---|----------|----------|----------|
| H | 4.996046 | 4.288218 | 3.201024 |
| H | 3.995083 | 4.249616 | 4.65596  |
| C | 3.267697 | 5.439118 | 3.030678 |
| O | 3.104928 | 6.631248 | 2.820656 |
| O | 2.571395 | 4.462041 | 2.53328  |
| C | 6.654889 | 5.130275 | 4.761753 |
| O | 7.523443 | 5.014586 | 3.899844 |
| N | 6.667741 | 4.344988 | 5.878608 |
| H | 5.964961 | 4.492378 | 6.593004 |
| C | 7.618166 | 3.259273 | 6.026818 |
| H | 8.651354 | 3.619635 | 5.915217 |
| C | 7.464464 | 2.123908 | 4.996194 |
| O | 8.334354 | 1.290327 | 4.842976 |
| N | 6.316031 | 2.150171 | 4.256183 |
| H | 5.634116 | 2.869635 | 4.451857 |
| C | 6.121017 | 1.306467 | 3.099318 |
| H | 6.358741 | 0.26526  | 3.361882 |
| C | 4.675964 | 1.396567 | 2.592411 |
| H | 4.571551 | 0.645382 | 1.796311 |
| H | 4.499015 | 2.387386 | 2.154581 |
| C | 3.620309 | 1.098718 | 3.64087  |
| O | 3.655572 | 0.042473 | 4.285997 |
| N | 2.671911 | 2.032577 | 3.793428 |
| H | 2.649907 | 2.941985 | 3.276609 |
| H | 1.918713 | 1.852103 | 4.447609 |
| C | 7.033525 | 1.656209 | 1.90376  |
| O | 7.043129 | 0.880676 | 0.937981 |
| N | 7.715057 | 2.804357 | 1.96474  |
| H | 7.636306 | 3.400758 | 2.791437 |
| C | 8.632244 | 3.26806  | 0.935892 |
| H | 8.521929 | 2.613623 | 0.062787 |
| C | 8.381249 | 4.732424 | 0.551851 |
| H | 8.508046 | 5.361201 | 1.445631 |
| H | 9.169805 | 5.024844 | -0.16101 |
| C | 7.01814  | 4.975813 | -0.05126 |
| C | 6.713854 | 4.556666 | -1.35403 |
| H | 7.487842 | 4.078969 | -1.95886 |
| C | 5.446601 | 4.753648 | -1.90873 |
| H | 5.229323 | 4.437714 | -2.93025 |
| C | 4.454102 | 5.395609 | -1.15613 |
| O | 3.186348 | 5.580837 | -1.62421 |
| H | 3.042527 | 5.215269 | -2.54108 |
| C | 4.744356 | 5.847658 | 0.13608  |
| H | 3.988751 | 6.391986 | 0.702273 |
| C | 6.010729 | 5.62524  | 0.677433 |
| H | 6.235358 | 5.980084 | 1.68461  |
| C | -8.81623 | -3.53284 | -3.16806 |

|   |          |          |          |
|---|----------|----------|----------|
| C | -8.33994 | -3.50666 | -1.71816 |
| C | -7.67254 | -3.46303 | -4.20098 |
| O | -8.61712 | -2.57114 | -0.96718 |
| C | -6.67855 | -2.39796 | -3.87494 |
| C | -5.30508 | -2.42971 | -3.77827 |
| N | -7.03443 | -1.11684 | -3.48739 |
| C | -5.92398 | -0.43693 | -3.1672  |
| N | -4.84627 | -1.20078 | -3.32944 |
| H | -9.41388 | -4.44042 | -3.34854 |
| H | -8.111   | -3.30219 | -5.20048 |
| H | -7.13315 | -4.42058 | -4.25764 |
| H | -4.63632 | -3.2563  | -4.00177 |
| H | -5.93466 | 0.560885 | -2.74363 |
| H | -7.95796 | -0.72181 | -3.31438 |
| N | -7.59915 | -4.56442 | -1.32906 |
| H | -7.27382 | -5.25035 | -2.00717 |
| C | -7.12553 | -4.79699 | 0.016283 |
| H | -7.92998 | -5.15199 | 0.68161  |
| H | -6.76495 | -3.86918 | 0.484202 |
| C | -6.01246 | -5.85113 | -0.05418 |
| O | -5.54614 | -6.1814  | -1.14221 |
| N | -5.64006 | -6.38418 | 1.130002 |
| H | -6.13057 | -6.06682 | 1.975382 |
| C | -4.83844 | -7.59478 | 1.200067 |
| H | -4.59327 | -7.87753 | 0.166771 |
| C | -3.55817 | -7.46743 | 2.028215 |
| H | -2.87454 | -6.74597 | 1.551494 |
| H | -3.80792 | -7.05098 | 3.018144 |
| C | -2.87195 | -8.82485 | 2.206314 |
| H | -2.66465 | -9.27653 | 1.221111 |
| H | -3.5654  | -9.52018 | 2.712697 |
| C | -1.55093 | -8.78066 | 2.980286 |
| H | -1.14477 | -9.79538 | 3.104902 |
| H | -0.80204 | -8.21284 | 2.415327 |
| N | -1.68654 | -8.17714 | 4.30682  |
| H | -2.22986 | -8.69441 | 4.989349 |
| C | -1.44325 | -6.88294 | 4.57903  |
| N | -0.66228 | -6.13523 | 3.815991 |
| H | 0.030651 | -6.49147 | 3.163321 |
| H | -0.61694 | -5.13022 | 4.07764  |
| N | -2.00113 | -6.3047  | 5.656953 |
| H | -2.76231 | -6.74213 | 6.157744 |
| H | -1.76161 | -5.33241 | 5.857461 |
| C | 2.154821 | -5.07477 | -4.79616 |
| H | 3.025499 | -5.71613 | -4.96325 |
| H | 1.367944 | -5.37161 | -5.50706 |
| N | 2.535844 | -3.68682 | -4.99117 |

|    |          |          |          |
|----|----------|----------|----------|
| H  | 3.572988 | -3.46963 | -4.97643 |
| C  | 1.639449 | -2.70795 | -4.98755 |
| N  | 0.340422 | -2.9833  | -4.70569 |
| H  | 0.140273 | -3.76586 | -4.09077 |
| H  | -0.2598  | -2.17095 | -4.57623 |
| N  | 1.962124 | -1.44274 | -5.27093 |
| H  | 2.902339 | -1.11358 | -5.53707 |
| H  | 1.250132 | -0.73539 | -5.09148 |
| O  | -0.56203 | -3.63501 | -1.87327 |
| C  | -1.74919 | -3.35337 | -1.66164 |
| O  | -2.11121 | -2.15677 | -1.31842 |
| C  | -2.83446 | -4.4012  | -1.72941 |
| H  | -2.99719 | -4.79179 | -0.71301 |
| H  | -3.79387 | -3.98371 | -2.05774 |
| O  | 1.164354 | 1.529934 | -1.48481 |
| O  | 1.087789 | -0.22627 | 1.808268 |
| Fe | -3.30106 | -0.71993 | -2.01191 |
| C  | 2.408489 | -1.61489 | -1.88102 |
| N  | 0.95896  | -1.28977 | -1.75675 |
| H  | 0.786029 | -0.65599 | -0.96981 |
| H  | 0.568898 | -0.80503 | -2.59759 |
| H  | 0.393761 | -2.16875 | -1.65119 |
| C  | 2.877333 | -2.41656 | -0.64935 |
| O  | 2.439528 | -2.04889 | 0.487204 |
| O  | 3.669701 | -3.34308 | -0.8629  |
| C  | 3.276773 | -0.37709 | -2.14355 |
| C  | 3.393565 | 0.654473 | -1.00599 |
| C  | 2.509759 | 1.899003 | -1.16563 |
| C  | 2.563946 | 2.703205 | 0.127462 |
| N  | 1.802117 | 3.974056 | 0.162608 |
| H  | 0.793366 | 3.832412 | 0.059472 |
| H  | 2.00433  | 4.391197 | 1.170551 |
| H  | 2.151081 | 4.654945 | -0.55253 |
| H  | 0.931298 | -9.16937 | 0.164268 |
| H  | -10.0948 | -3.33699 | 4.520715 |
| H  | -11.7347 | -1.06301 | 0.987031 |
| H  | -7.1729  | 4.511989 | -3.15692 |
| H  | -0.61676 | 12.22222 | -0.79474 |
| H  | -5.55067 | -4.97131 | 5.561076 |
| H  | -5.45913 | -8.40629 | 1.621757 |
| H  | -9.49319 | -2.67498 | -3.28286 |
| H  | -2.54668 | -5.24305 | -2.37039 |
| H  | 5.591046 | 6.75584  | 3.838461 |
| H  | 9.668272 | 3.155984 | 1.29987  |
| H  | 7.525652 | 2.831212 | 7.034958 |
| H  | -0.87215 | -1.75223 | 6.418442 |
| H  | 3.853982 | -4.17224 | 4.78939  |

|   |          |          |          |
|---|----------|----------|----------|
| H | 7.864177 | 2.161527 | -3.20856 |
| H | 10.68236 | -0.53867 | -1.27373 |
| H | 5.061445 | -6.29559 | -4.83879 |
| H | 0.274763 | -0.30131 | 1.259071 |
| H | 1.727105 | -0.82912 | 1.352002 |
| H | 2.200382 | 2.079946 | 0.954165 |
| H | 3.606735 | 2.970038 | 0.336068 |
| H | 0.949293 | 1.966888 | -2.37184 |
| H | 2.889105 | 2.51948  | -1.99343 |
| H | 3.1612   | 0.173765 | -0.04536 |
| H | 4.439265 | 0.987942 | -0.91991 |
| H | 2.917055 | 0.103134 | -3.06466 |
| H | 4.27069  | -0.78167 | -2.37773 |
| H | 2.506862 | -2.28632 | -2.73862 |
| H | 1.804864 | -5.2748  | -3.77057 |
| O | -1.05458 | 2.273138 | -0.14633 |
| H | -0.23711 | 2.046228 | -0.65999 |
| H | -0.73939 | 2.303214 | 0.805275 |
| O | -1.24593 | -0.36174 | 0.471582 |
| H | -1.5091  | -1.07936 | -0.14994 |
| H | -1.34471 | 0.522191 | 0.037718 |
| O | -3.60324 | 3.622398 | -0.35202 |
| H | -4.02889 | 3.054816 | -1.02635 |
| H | -2.69156 | 3.285188 | -0.24964 |
| O | -0.16488 | 2.089988 | 2.361788 |
| H | 0.528696 | 1.399296 | 2.318434 |
| H | -0.9336  | 1.626485 | 2.763521 |
| O | -2.23426 | 0.365927 | 2.924196 |
| H | -2.07779 | -0.05827 | 2.051377 |
| H | -3.15783 | 0.651445 | 2.906959 |
| O | -6.15482 | 4.779484 | 0.183231 |
| H | -5.22936 | 4.469599 | 0.190633 |
| H | -6.08638 | 5.75957  | 0.225685 |

<sup>5</sup>Re<sub>C2</sub>

|   |          |          |          |
|---|----------|----------|----------|
| C | -0.10808 | -6.5304  | -2.8828  |
| H | 0.137805 | -5.97433 | -1.96546 |
| C | -0.23678 | -5.59933 | -4.08164 |
| H | -0.43524 | -6.20251 | -4.98065 |
| H | -1.11629 | -4.96575 | -3.9366  |
| C | 0.957839 | -4.682   | -4.31666 |
| H | 1.207985 | -4.12307 | -3.39877 |
| H | 1.866681 | -5.24392 | -4.58065 |
| C | 0.650864 | -3.64252 | -5.38995 |
| O | -0.48865 | -3.18862 | -5.53784 |
| N | 1.690876 | -3.24849 | -6.14867 |
| H | 2.669574 | -3.41825 | -5.88847 |
| H | 1.507046 | -2.54042 | -6.85131 |
| C | -1.36779 | -7.36484 | -2.6754  |
| O | -2.02525 | -7.78282 | -3.63498 |
| N | -1.68435 | -7.65021 | -1.39809 |
| H | -1.26281 | -7.13733 | -0.61698 |
| C | -2.72661 | -8.5983  | -1.0331  |
| H | -2.55402 | -8.8461  | 0.02523  |
| C | -4.16635 | -8.11106 | -1.21321 |
| H | -4.39571 | -8.07463 | -2.28934 |
| H | -4.82183 | -8.88789 | -0.78095 |
| C | -4.46928 | -6.7578  | -0.5692  |
| H | -4.0656  | -5.93833 | -1.18543 |
| H | -3.97656 | -6.67335 | 0.414085 |
| C | -5.9728  | -6.53839 | -0.40606 |
| H | -6.48603 | -6.70927 | -1.36769 |
| H | -6.37878 | -7.2809  | 0.308141 |
| N | -6.24152 | -5.18331 | 0.032013 |
| H | -5.52339 | -4.67604 | 0.587236 |
| C | -7.33106 | -4.47751 | -0.24364 |
| N | -8.46355 | -5.07163 | -0.69773 |
| H | -8.63925 | -6.0329  | -0.43199 |
| H | -9.2734  | -4.45096 | -0.80209 |
| N | -7.30784 | -3.15511 | -0.10104 |
| H | -6.40408 | -2.66932 | -0.10278 |
| H | -8.19099 | -2.64962 | -0.14156 |
| C | -7.5458  | -3.12174 | -4.71621 |
| H | -7.91428 | -3.91743 | -5.38381 |
| C | -6.72631 | -3.74287 | -3.56408 |
| H | -6.48816 | -2.97019 | -2.81547 |
| H | -7.33135 | -4.49775 | -3.04218 |
| C | -5.44888 | -4.36764 | -4.01784 |
| N | -4.43602 | -3.61602 | -4.58056 |
| C | -3.4385  | -4.45457 | -4.83135 |



|   |          |          |          |
|---|----------|----------|----------|
| H | -2.46796 | -4.18661 | -5.25119 |
| N | -3.7647  | -5.71756 | -4.46364 |
| H | -3.13463 | -6.53305 | -4.43661 |
| C | -5.04054 | -5.68183 | -3.94635 |
| H | -5.53707 | -6.57258 | -3.5756  |
| C | -8.69466 | -2.29776 | -4.17108 |
| O | -8.66047 | -1.07308 | -4.09236 |
| N | -9.75607 | -3.00819 | -3.69558 |
| H | -9.72596 | -4.0209  | -3.71237 |
| C | -10.8404 | -2.35747 | -2.97192 |
| H | -11.1456 | -1.47592 | -3.55593 |
| C | -12.0203 | -3.3037  | -2.80036 |
| H | -12.8481 | -2.79608 | -2.28516 |
| H | -11.7338 | -4.17503 | -2.19197 |
| H | -12.3803 | -3.64922 | -3.78051 |
| C | -10.2947 | -1.89107 | -1.61114 |
| O | -10.0481 | -2.70922 | -0.71314 |
| N | -10.0704 | -0.57955 | -1.48763 |
| H | -10.1125 | -0.03693 | -2.34435 |
| C | -9.43757 | 0.033092 | -0.32237 |
| H | -8.51635 | -0.51117 | -0.05902 |
| C | -9.07915 | 1.496158 | -0.59826 |
| H | -10.0033 | 2.012385 | -0.92253 |
| C | -8.58131 | 2.166012 | 0.685992 |
| H | -9.34895 | 2.152339 | 1.476474 |
| H | -7.69353 | 1.635383 | 1.065511 |
| H | -8.29971 | 3.210591 | 0.488802 |
| C | -8.0309  | 1.611012 | -1.71142 |
| H | -8.33827 | 1.111026 | -2.64257 |
| H | -7.09135 | 1.145696 | -1.37638 |
| H | -7.83299 | 2.667593 | -1.94499 |
| C | -3.01578 | 1.510569 | 4.932677 |
| H | -2.10243 | 2.121229 | 4.870892 |
| C | -2.61765 | 0.072017 | 5.275278 |
| H | -1.83312 | -0.24576 | 4.564747 |
| C | -2.05128 | -0.01653 | 6.688551 |
| H | -1.80974 | -1.06217 | 6.938456 |
| H | -2.79816 | 0.325461 | 7.421887 |
| H | -1.13957 | 0.590231 | 6.77755  |
| O | -3.76074 | -0.75407 | 5.126556 |
| H | -3.43905 | -1.68776 | 5.103455 |
| C | -3.8054  | 1.648366 | 3.650617 |
| O | -4.7884  | 2.41345  | 3.57889  |
| N | -3.42359 | 0.909141 | 2.601082 |
| H | -2.6074  | 0.283054 | 2.66233  |
| C | -4.26771 | 0.735788 | 1.442142 |
| H | -4.76178 | 1.677007 | 1.178527 |

|   |          |          |          |
|---|----------|----------|----------|
| H | -3.64771 | 0.441849 | 0.591093 |
| C | -5.3613  | -0.33187 | 1.574008 |
| O | -6.14999 | -0.47883 | 0.637394 |
| N | -5.36962 | -1.04063 | 2.715338 |
| H | -4.68611 | -0.83439 | 3.452535 |
| C | -6.26531 | -2.1552  | 2.967615 |
| H | -7.0082  | -2.17812 | 2.162289 |
| C | -5.51775 | -3.48935 | 3.057144 |
| H | -4.84412 | -3.48993 | 3.927454 |
| H | -6.25936 | -4.29226 | 3.206279 |
| O | -4.78606 | -3.80755 | 1.890014 |
| H | -4.20873 | -3.06048 | 1.59357  |
| C | -1.89052 | 7.930853 | 4.964299 |
| H | -1.42859 | 7.51723  | 5.873061 |
| C | -2.55363 | 6.833419 | 4.124327 |
| H | -3.02329 | 7.311938 | 3.252736 |
| H | -3.37207 | 6.368743 | 4.70169  |
| C | -1.59869 | 5.739027 | 3.626167 |
| H | -0.74099 | 6.227414 | 3.12799  |
| C | -1.04993 | 4.887989 | 4.774109 |
| H | -0.44388 | 5.479249 | 5.479197 |
| H | -0.41774 | 4.077286 | 4.390022 |
| H | -1.87052 | 4.427946 | 5.349905 |
| C | -2.31101 | 4.881343 | 2.580199 |
| H | -1.65776 | 4.08307  | 2.20493  |
| H | -2.62535 | 5.499904 | 1.724765 |
| H | -3.21583 | 4.411517 | 2.998376 |
| C | -0.87553 | 8.682161 | 4.129831 |
| O | -1.19659 | 9.318628 | 3.122328 |
| N | 0.415273 | 8.609049 | 4.519413 |
| H | 0.662476 | 8.035172 | 5.314716 |
| C | 1.454295 | 9.272578 | 3.772829 |
| H | 1.302743 | 10.36397 | 3.794009 |
| C | 1.549454 | 8.796499 | 2.321127 |
| O | 1.296216 | 7.639935 | 1.991798 |
| N | 1.973034 | 9.741611 | 1.457937 |
| H | 2.292236 | 10.62634 | 1.83346  |
| C | 2.356164 | 9.386715 | 0.109739 |
| H | 1.509123 | 8.930665 | -0.41409 |
| C | 3.539812 | 8.4139   | 0.119625 |
| O | 4.419857 | 8.489818 | 0.962107 |
| N | 3.514669 | 7.490235 | -0.8711  |
| C | 4.552732 | 6.489834 | -0.94795 |
| C | 4.560655 | 5.886925 | -2.34713 |
| C | 4.384972 | 5.381874 | 0.140033 |
| O | 3.538346 | 5.819071 | -3.03577 |
| C | 3.073486 | 4.676069 | 0.077664 |

|   |          |          |          |
|---|----------|----------|----------|
| C | 2.725701 | 3.422603 | -0.37699 |
| N | 1.877782 | 5.276021 | 0.445754 |
| C | 0.871377 | 4.424709 | 0.200137 |
| N | 1.34897  | 3.282924 | -0.29555 |
| H | 2.66307  | 7.344041 | -1.419   |
| H | 5.518219 | 6.975733 | -0.74547 |
| H | 5.210236 | 4.662928 | 0.053688 |
| H | 4.501679 | 5.892736 | 1.107663 |
| H | 3.3726   | 2.632674 | -0.74998 |
| H | -0.17895 | 4.638177 | 0.371166 |
| H | 1.751076 | 6.215855 | 0.846782 |
| N | 5.750692 | 5.394855 | -2.74566 |
| H | 6.510522 | 5.288414 | -2.05667 |
| C | 5.811225 | 4.505117 | -3.88181 |
| H | 5.229359 | 4.920231 | -4.71542 |
| C | 5.294334 | 3.125524 | -3.4795  |
| O | 5.60726  | 2.61972  | -2.39411 |
| N | 4.464386 | 2.498512 | -4.32503 |
| C | 3.913709 | 1.202429 | -3.96153 |
| C | 5.041154 | 0.1546   | -3.90512 |
| C | 2.839549 | 0.767677 | -4.95465 |
| O | 5.809987 | 0.012898 | -4.84169 |
| C | 1.948779 | -0.35128 | -4.40193 |
| C | 0.87915  | 0.130244 | -3.44415 |
| O | -0.31452 | -0.12676 | -3.69504 |
| O | 1.24363  | 0.780247 | -2.39799 |
| H | 4.294304 | 2.880749 | -5.24811 |
| H | 3.472883 | 1.308607 | -2.96389 |
| H | 2.215532 | 1.636102 | -5.22631 |
| H | 3.337962 | 0.4184   | -5.8727  |
| H | 2.558693 | -1.10694 | -3.88036 |
| H | 1.439977 | -0.87107 | -5.21828 |
| N | 5.063812 | -0.55896 | -2.75464 |
| H | 4.463074 | -0.27064 | -1.96943 |
| C | 6.039634 | -1.5889  | -2.47019 |
| H | 5.749777 | -2.03219 | -1.50569 |
| C | 6.070881 | -2.70286 | -3.54459 |
| H | 6.66155  | -2.38853 | -4.41061 |
| H | 6.54065  | -3.59759 | -3.1076  |
| C | 4.693711 | -3.06443 | -4.07581 |
| O | 3.736072 | -3.36501 | -3.1958  |
| O | 4.436788 | -3.07701 | -5.26147 |
| C | 7.460745 | -1.03579 | -2.26023 |
| O | 8.40645  | -1.80016 | -2.06644 |
| N | 7.601254 | 0.303899 | -2.31304 |
| H | 6.779241 | 0.901657 | -2.35917 |
| C | 8.909962 | 0.929265 | -2.45893 |

|   |          |          |          |
|---|----------|----------|----------|
| H | 9.566506 | 0.151232 | -2.87862 |
| C | 8.852738 | 2.117436 | -3.40737 |
| H | 9.86735  | 2.482826 | -3.61741 |
| H | 8.29264  | 2.948204 | -2.96169 |
| H | 8.376044 | 1.812621 | -4.35036 |
| C | 9.493782 | 1.296849 | -1.07982 |
| O | 9.668259 | 2.458218 | -0.71559 |
| N | 9.794859 | 0.212387 | -0.33575 |
| H | 9.44951  | -0.68106 | -0.69503 |
| C | 10.33437 | 0.271101 | 1.01775  |
| H | 11.28599 | 0.831446 | 0.975252 |
| C | 9.42856  | 1.00358  | 2.027334 |
| H | 9.500834 | 2.076706 | 1.811716 |
| H | 9.862475 | 0.819605 | 3.019693 |
| C | 7.976056 | 0.589236 | 2.008455 |
| C | 7.027758 | 1.397355 | 1.361317 |
| H | 7.355766 | 2.307054 | 0.855362 |
| C | 5.668946 | 1.074877 | 1.397004 |
| H | 4.940945 | 1.736983 | 0.923276 |
| C | 5.242247 | -0.07235 | 2.070622 |
| H | 4.179628 | -0.29155 | 2.15169  |
| C | 6.178488 | -0.90864 | 2.685745 |
| H | 5.829632 | -1.80363 | 3.205725 |
| C | 7.535652 | -0.57719 | 2.65738  |
| H | 8.268805 | -1.20789 | 3.160959 |
| C | 10.68013 | -1.15317 | 1.501737 |
| O | 10.58526 | -1.45904 | 2.679893 |
| N | 11.09632 | -2.01686 | 0.538807 |
| H | 11.1572  | -1.6864  | -0.41663 |
| C | 11.17865 | -3.45342 | 0.759492 |
| H | 11.30096 | -3.60358 | 1.839954 |
| C | 9.941012 | -4.18448 | 0.223269 |
| H | 9.878079 | -4.00935 | -0.86486 |
| H | 10.09235 | -5.27077 | 0.358268 |
| C | 8.606852 | -3.76613 | 0.861509 |
| H | 8.529566 | -2.66739 | 0.789109 |
| C | 7.429858 | -4.33662 | 0.069048 |
| H | 7.49509  | -4.03666 | -0.98751 |
| H | 7.408454 | -5.43953 | 0.116033 |
| H | 6.476532 | -3.96181 | 0.467801 |
| C | 8.510596 | -4.14402 | 2.342443 |
| H | 9.293776 | -3.65526 | 2.939309 |
| H | 7.537794 | -3.833   | 2.756783 |
| H | 8.598679 | -5.23637 | 2.475217 |
| C | 3.940391 | -5.85521 | 5.440824 |
| H | 4.493364 | -6.1358  | 6.353412 |
| C | 3.739207 | -4.32897 | 5.422562 |

|   |          |          |          |
|---|----------|----------|----------|
| H | 3.127535 | -4.01065 | 6.284222 |
| H | 4.715564 | -3.83551 | 5.515411 |
| C | 3.050049 | -3.84171 | 4.144904 |
| O | 3.733657 | -3.12611 | 3.365094 |
| O | 1.861772 | -4.20766 | 3.938276 |
| C | 2.661908 | -6.67787 | 5.392836 |
| O | 2.437912 | -7.50969 | 4.512395 |
| N | 1.775574 | -6.44971 | 6.394949 |
| H | 1.996807 | -5.74515 | 7.086731 |
| C | 0.54935  | -7.20663 | 6.536748 |
| H | 0.759992 | -8.28669 | 6.498346 |
| C | -0.53142 | -6.96427 | 5.478147 |
| O | -1.53983 | -7.64755 | 5.479489 |
| N | -0.26612 | -5.99982 | 4.556458 |
| H | 0.606515 | -5.46112 | 4.574767 |
| C | -1.13876 | -5.81244 | 3.424127 |
| H | -2.11675 | -6.23613 | 3.705107 |
| C | -1.30955 | -4.33232 | 3.041528 |
| H | -2.1428  | -4.24516 | 2.335334 |
| H | -0.38685 | -3.99182 | 2.562721 |
| C | -1.59718 | -3.43064 | 4.228484 |
| O | -2.75142 | -3.1589  | 4.578747 |
| N | -0.51401 | -2.94701 | 4.855927 |
| H | 0.433746 | -3.17164 | 4.535744 |
| H | -0.64061 | -2.3265  | 5.646183 |
| C | -0.69431 | -6.62495 | 2.19164  |
| O | -1.25309 | -6.45065 | 1.103395 |
| N | 0.281901 | -7.53023 | 2.39614  |
| H | 0.751176 | -7.55251 | 3.303642 |
| C | 0.662843 | -8.53514 | 1.426204 |
| H | 0.197872 | -8.27887 | 0.465685 |
| C | 2.191084 | -8.6671  | 1.268526 |
| H | 2.632551 | -8.90881 | 2.246223 |
| H | 2.379618 | -9.51395 | 0.588955 |
| C | 2.81621  | -7.42187 | 0.720303 |
| C | 2.735692 | -7.12219 | -0.66852 |
| H | 2.262985 | -7.84507 | -1.33755 |
| C | 3.227821 | -5.94337 | -1.17289 |
| H | 3.152141 | -5.69352 | -2.23222 |
| C | 3.835049 | -4.97168 | -0.28444 |
| O | 4.203202 | -3.82939 | -0.69788 |
| H | 4.032003 | -3.45625 | -2.2431  |
| C | 3.959548 | -5.31496 | 1.115166 |
| H | 4.424493 | -4.58929 | 1.783555 |
| C | 3.442463 | -6.49542 | 1.591544 |
| H | 3.477347 | -6.73949 | 2.654019 |
| C | -0.21325 | 7.805485 | -3.75851 |

|   |          |          |          |
|---|----------|----------|----------|
| C | -0.20781 | 7.908918 | -2.24417 |
| C | -0.93818 | 6.541202 | -4.26213 |
| O | 0.650093 | 7.341173 | -1.56265 |
| C | -0.39369 | 5.25119  | -3.74027 |
| C | -1.04205 | 4.135651 | -3.25875 |
| N | 0.952271 | 4.925393 | -3.71309 |
| C | 1.071801 | 3.672383 | -3.23358 |
| N | -0.11816 | 3.157399 | -2.9401  |
| H | -0.68547 | 8.691131 | -4.2099  |
| H | -0.89757 | 6.545896 | -5.3654  |
| H | -2.00462 | 6.587719 | -3.99235 |
| H | -2.11194 | 3.98895  | -3.13952 |
| H | 2.033539 | 3.202242 | -3.06022 |
| H | 1.76623  | 5.543175 | -3.77662 |
| N | -1.20107 | 8.637046 | -1.69775 |
| H | -1.95995 | 9.002578 | -2.26999 |
| C | -1.41974 | 8.767408 | -0.27654 |
| H | -0.78325 | 9.546394 | 0.179297 |
| H | -1.16127 | 7.831005 | 0.242599 |
| C | -2.88971 | 9.126737 | -0.05099 |
| O | -3.63287 | 9.315321 | -1.02014 |
| N | -3.27364 | 9.21262  | 1.229629 |
| H | -2.5544  | 9.17638  | 1.967695 |
| C | -4.65503 | 9.440028 | 1.614555 |
| H | -5.13218 | 10.08476 | 0.86013  |
| C | -5.44714 | 8.136184 | 1.762963 |
| H | -5.42443 | 7.589665 | 0.807963 |
| H | -4.94263 | 7.496317 | 2.504003 |
| C | -6.89596 | 8.365568 | 2.186361 |
| H | -7.42173 | 8.965058 | 1.425786 |
| H | -6.93006 | 8.96347  | 3.116236 |
| C | -7.67835 | 7.06591  | 2.392997 |
| H | -8.74026 | 7.287433 | 2.586504 |
| H | -7.63867 | 6.455353 | 1.483791 |
| N | -7.16603 | 6.28108  | 3.511051 |
| H | -7.23926 | 6.708505 | 4.426904 |
| C | -6.4651  | 5.132089 | 3.449619 |
| N | -6.2376  | 4.495424 | 2.308301 |
| H | -6.57577 | 4.805145 | 1.375347 |
| H | -5.75098 | 3.598231 | 2.393274 |
| N | -5.96662 | 4.618649 | 4.586693 |
| H | -6.23661 | 4.994785 | 5.484742 |
| H | -5.47775 | 3.708685 | 4.521405 |
| C | -5.51149 | -0.06344 | -3.4823  |
| H | -6.51861 | -0.42036 | -3.73329 |
| H | -5.47854 | 1.013722 | -3.69779 |
| N | -4.53522 | -0.77403 | -4.29216 |

|    |          |          |          |
|----|----------|----------|----------|
| H  | -4.64759 | -1.79886 | -4.45354 |
| C  | -3.32469 | -0.31607 | -4.59354 |
| N  | -2.92195 | 0.912631 | -4.21773 |
| H  | -3.324   | 1.328224 | -3.37486 |
| H  | -1.93099 | 1.106055 | -4.33474 |
| N  | -2.49428 | -1.08165 | -5.32191 |
| H  | -2.80804 | -2.00417 | -5.59635 |
| H  | -1.4885  | -0.98328 | -5.18866 |
| O  | -3.2115  | 1.717174 | -1.54806 |
| C  | -2.82524 | 2.708924 | -0.89421 |
| O  | -1.61824 | 2.898585 | -0.52523 |
| C  | -3.77687 | 3.825907 | -0.52579 |
| H  | -3.6603  | 4.020625 | 0.549153 |
| O  | -0.19523 | 0.549646 | 0.076447 |
| O  | -1.26828 | -0.86091 | 2.062757 |
| Fe | 0.028001 | 1.87068  | -1.08681 |
| C  | -2.50193 | -2.11483 | -1.71087 |
| N  | -1.89476 | -0.76745 | -1.56881 |
| H  | -1.28195 | -0.60344 | -0.73702 |
| H  | -1.28786 | -0.54231 | -2.39444 |
| H  | -2.58102 | 0.012677 | -1.5246  |
| C  | -3.52563 | -2.36459 | -0.58823 |
| O  | -3.15551 | -2.09269 | 0.601078 |
| O  | -4.61926 | -2.82653 | -0.93518 |
| C  | -1.43591 | -3.21221 | -1.82241 |
| C  | -0.5588  | -3.46935 | -0.58864 |
| C  | 0.746069 | -2.66856 | -0.47525 |
| C  | 1.355079 | -2.9325  | 0.896115 |
| N  | 2.648485 | -2.26475 | 1.148355 |
| H  | 2.530444 | -1.24223 | 1.165949 |
| H  | 3.058469 | -2.59066 | 2.110242 |
| H  | 3.34434  | -2.48954 | 0.422214 |
| H  | -10.1216 | -0.04621 | 0.538591 |
| H  | 2.423063 | 9.057754 | 4.248647 |
| H  | 2.652581 | 10.30076 | -0.42472 |
| H  | 6.858699 | 4.399344 | -4.20079 |
| H  | 12.08614 | -3.83836 | 0.268155 |
| H  | -2.64498 | 8.665178 | 5.289007 |
| H  | -4.65401 | 9.996087 | 2.565459 |
| H  | 0.838949 | 7.796107 | -4.08072 |
| H  | -3.39287 | 4.726204 | -1.03333 |
| H  | 4.560001 | -6.16793 | 4.58929  |
| H  | 0.263075 | -9.51793 | 1.731363 |
| H  | 0.108013 | -6.99807 | 7.521119 |
| H  | -3.64492 | 1.92855  | 5.732018 |
| H  | -6.79608 | -1.98904 | 3.921022 |
| H  | 0.717678 | -7.24695 | -3.04223 |

|   |          |          |          |
|---|----------|----------|----------|
| H | -2.58642 | -9.51753 | -1.62303 |
| H | -6.91659 | -2.4514  | -5.31613 |
| H | -0.86129 | -0.31049 | 1.336937 |
| H | -1.90457 | -1.44161 | 1.573671 |
| H | 0.668655 | -2.57773 | 1.671888 |
| H | 1.499961 | -4.00778 | 1.06803  |
| H | 0.573611 | -1.58667 | -0.58486 |
| H | 1.451859 | -2.96007 | -1.27268 |
| H | -1.1644  | -3.30241 | 0.310919 |
| H | -0.30504 | -4.53921 | -0.55279 |
| H | -0.82545 | -3.00139 | -2.71547 |
| H | -1.99973 | -4.12813 | -2.05264 |
| H | -3.06713 | -2.10919 | -2.64807 |
| H | -5.33991 | -0.21696 | -2.40355 |
| O | 1.973729 | 0.58418  | 1.538707 |
| H | 1.154537 | 0.503876 | 0.964039 |
| H | 1.722772 | 0.101069 | 2.380065 |
| O | 0.093903 | 2.420279 | 2.440511 |
| H | -0.52986 | 2.029617 | 1.802826 |
| H | 0.953317 | 2.079509 | 2.10875  |
| O | 3.26048  | -0.01212 | -0.77476 |
| H | 2.468624 | 0.199124 | -1.31002 |
| H | 3.080524 | 0.3615   | 0.111029 |
| O | 1.043092 | -0.76455 | 3.594593 |
| H | 0.161217 | -0.97348 | 3.215154 |
| H | 0.854709 | -0.07759 | 4.272327 |
| O | 0.318812 | 1.501021 | 4.948329 |
| H | 0.162039 | 1.877573 | 4.044642 |
| H | 1.025038 | 2.042462 | 5.326164 |
| O | 7.427101 | 4.15724  | -0.91548 |
| H | 6.865778 | 3.438164 | -1.26358 |
| H | 8.314209 | 3.751395 | -0.81174 |
| C | -5.23917 | 3.627677 | -0.90592 |
| H | -5.29221 | 3.133506 | -1.8867  |
| H | -5.77082 | 2.981082 | -0.19661 |
| C | -5.92496 | 4.984227 | -1.0401  |
| O | -5.43364 | 5.772656 | -1.87289 |
| O | -6.92552 | 5.248902 | -0.28804 |
| C | -7.4146  | 8.562724 | -1.3165  |
| N | -8.24282 | 7.546957 | -1.0457  |
| N | -6.15632 | 8.311452 | -1.63275 |
| N | -7.85652 | 9.841891 | -1.24096 |
| H | -7.26732 | 10.54207 | -1.67562 |
| H | -5.86245 | 7.303944 | -1.768   |
| H | -5.40577 | 8.993867 | -1.49796 |
| H | -7.82966 | 6.603313 | -0.85165 |
| H | -9.24394 | 7.680938 | -1.03479 |



|   |          |          |          |
|---|----------|----------|----------|
| C | -9.20512 | 10.22243 | -0.86565 |
| H | -9.50407 | 9.713122 | 0.063833 |
| H | -9.23116 | 11.30312 | -0.67614 |
| H | -9.94873 | 9.995688 | -1.65041 |
